# Supplementary material for: Why choose Random Forest to predict rare species distribution with few samples in large undersampled areas? Three Asian crane species models provide supporting evidence
Source: PeerJ journal article supplement (doi:10.7717/peerj.2849), 2017-01-12
Supplement: LiteraturePoint.pdf [file LiteraturePoint.pdf]

| Species           | X            | Y           |
|-------------------|--------------|-------------|
| Hooded Crane      | -5149269.912 | 8337727.926 |
| Hooded Crane      | -5215490.008 | 8264306.159 |
| Hooded Crane      | -5350579.006 | 8163245.022 |
| Hooded Crane      | -5420772.309 | 8142684.375 |
| Hooded Crane      | -5493614.415 | 8117063.617 |
| Hooded Crane      | -5557185.708 | 8050860.992 |
| Hooded Crane      | -6305119.629 | 8648728.475 |
| Hooded Crane      | -6312536.280 | 8688219.834 |
| Hooded Crane      | -5104416.833 | 7202863.745 |
| Hooded Crane      | -4985220.658 | 7266611.894 |
| Hooded Crane      | -4536248.401 | 6972732.579 |
| Hooded Crane      | -4481947.922 | 6807122.344 |
| Hooded Crane      | -4438242.658 | 6697881.302 |
| Hooded Crane      | -4803777.593 | 6337890.620 |
| Hooded Crane      | -4737557.496 | 6527358.147 |
| Hooded Crane      | -4810399.602 | 7092542.512 |
| Hooded Crane      | -4879268.503 | 7001409.844 |
| Hooded Crane      | -4805101.995 | 6854709.193 |
| Hooded Crane      | -4856753.670 | 6700009.098 |
| Hooded Crane      | -4785235.966 | 6627976.248 |
| Hooded Crane      | -4873970.895 | 6815753.465 |
| Hooded Crane      | -4715042.663 | 5841740.168 |
| Hooded Crane      | -4752125.917 | 5895681.711 |
| Hooded Crane      | -4953435.012 | 5868669.017 |
| Hooded Crane      | -5075279.990 | 5824472.696 |
| Hooded Crane      | -5017006.305 | 5834061.508 |
| Hooded Crane      | -5073955.588 | 5895681.711 |
| Hooded Crane      | -9320771.797 | 8723557.370 |
| Hooded Crane      | -9875431.328 | 6983634.516 |
| White-naped Crane | -4883415.148 | 6278093.693 |
| White-naped Crane | -5003141.083 | 6149709.288 |
| White-naped Crane | -5096378.980 | 6127441.880 |
| White-naped Crane | -5250440.035 | 5857165.063 |
| White-naped Crane | -5216005.585 | 5938349.090 |
| White-naped Crane | -5153758.694 | 6041114.012 |
| White-naped Crane | -5289642.333 | 6086440.394 |
| White-naped Crane | -5443537.838 | 5939125.951 |
| White-naped Crane | -5824762.243 | 6559340.609 |
| White-naped Crane | -5864118.018 | 6504579.965 |
| White-naped Crane | -5830791.473 | 6376030.929 |
| White-naped Crane | -5765693.917 | 6355258.695 |
| White-naped Crane | -5736027.314 | 6503064.064 |
| White-naped Crane | -5803571.812 | 6449234.596 |
| White-naped Crane | -5696560.136 | 6399035.881 |
| White-naped Crane | -5638021.570 | 6445108.429 |
| White-naped Crane | -5600143.675 | 6318614.798 |
| White-naped Crane | -5557762.813 | 6215255.128 |
| White-naped Crane | -5512203.386 | 6211243.417 |
| White-naped Crane | -5310894.292 | 5592426.269 |
| White-naped Crane | -5276459.841 | 5642976.553 |
| White-naped Crane | -6197175.239 | 5903598.655 |
| White-naped Crane | -6398484.334 | 5586404.328 |
| White-naped Crane | -6811697.738 | 6197564.516 |
| White-naped Crane | -6979102.143 | 6207180.170 |
| White-naped Crane | -7083041.207 | 6761906.950 |
| White-naped Crane | -7316301.498 | 6356591.778 |
| White-naped Crane | -7250346.282 | 6249539.777 |

|                    |               |             |
|--------------------|---------------|-------------|
| White-naped Crane  | -7170882.166  | 6402017.325 |
| White-naped Crane  | -7205051.736  | 6372523.730 |
| White-naped Crane  | -7229685.612  | 6329699.494 |
| White-naped Crane  | -7730786.329  | 5963399.951 |
| White-naped Crane  | -7804687.957  | 6036163.121 |
| White-naped Crane  | -7847598.580  | 6134553.815 |
| White-naped Crane  | -7646554.365  | 6293431.025 |
| White-naped Crane  | -7679134.653  | 6152457.706 |
| White-naped Crane  | -7722354.303  | 6173713.093 |
| White-naped Crane  | -7778641.385  | 6184700.746 |
| White-naped Crane  | -7811089.233  | 6154768.081 |
| White-naped Crane  | -8609703.601  | 6029866.460 |
| White-naped Crane  | -6964399.074  | 5158944.876 |
| White-naped Crane  | -7055120.607  | 5326024.927 |
| Black-necked Crane | -11422278.870 | 4100547.792 |
| Black-necked Crane | -11167993.700 | 3924871.144 |
| Black-necked Crane | -11341556.570 | 4007036.776 |
| Black-necked Crane | -11311095.330 | 3971704.647 |
| Black-necked Crane | -11285600.590 | 3944783.464 |
| Black-necked Crane | -11353476.190 | 3902944.557 |
| Black-necked Crane | -11303855.260 | 3843070.070 |
| Black-necked Crane | -11236575.650 | 3858130.640 |
| Black-necked Crane | -11263063.680 | 3893978.310 |
| Black-necked Crane | -11136419.960 | 3765495.328 |
| Black-necked Crane | -11012601.620 | 3792918.654 |
| Black-necked Crane | -10666575.130 | 3769081.872 |
| Black-necked Crane | -10530294.170 | 3651081.117 |
| Black-necked Crane | -10174493.590 | 3595674.406 |
| Black-necked Crane | -10671059.330 | 3433693.030 |
| Black-necked Crane | -10535016.760 | 3399543.080 |
| Black-necked Crane | -10548154.830 | 3351499.788 |
| Black-necked Crane | -10335862.030 | 3378326.021 |
| Black-necked Crane | -10281296.670 | 3365051.685 |
| Black-necked Crane | -10237326.520 | 3336738.417 |
| Black-necked Crane | -10213752.170 | 3396751.745 |
| Black-necked Crane | -10145677.910 | 3383458.405 |
| Black-necked Crane | -10100913.130 | 3369877.136 |
| Black-necked Crane | -10126341.640 | 3431864.134 |
| Black-necked Crane | -10034587.080 | 3705425.351 |
| Black-necked Crane | -9796724.488  | 3669787.694 |
| Black-necked Crane | -9828355.621  | 3780774.340 |
| Black-necked Crane | -9961597.078  | 3573147.363 |
| Black-necked Crane | -9897694.684  | 3544441.394 |
| Black-necked Crane | -9867895.641  | 3505888.765 |
| Black-necked Crane | -9821541.573  | 3454922.446 |
| Black-necked Crane | -9861273.631  | 3448471.278 |
| Black-necked Crane | -9899681.287  | 3438232.052 |
| Black-necked Crane | -9941399.948  | 3389046.981 |
| Black-necked Crane | -9860942.531  | 3375082.604 |
| Black-necked Crane | -9875179.851  | 3412102.547 |
| Black-necked Crane | -9812270.759  | 3379232.593 |
| Black-necked Crane | -10124984.130 | 4405538.119 |
| Black-necked Crane | -11284555.420 | 3878983.419 |
| Black-necked Crane | -11253862.400 | 3845142.092 |
| Black-necked Crane | -8897923.528  | 4391451.129 |
| Black-necked Crane | -9468343.442  | 4313764.970 |
| Black-necked Crane | -9299879.516  | 4318182.315 |
| Black-necked Crane | -9214381.093  | 4113144.946 |

|                    |               |             |
|--------------------|---------------|-------------|
| Black-necked Crane | -9115713.149  | 4082679.017 |
| Black-necked Crane | -9097171.522  | 4121979.747 |
| Black-necked Crane | -9222989.706  | 3967186.666 |
| Black-necked Crane | -9291196.406  | 3893728.721 |
| Black-necked Crane | -9315697.841  | 3779343.624 |
| Black-necked Crane | -8569671.059  | 3938363.210 |
| Black-necked Crane | -8495749.565  | 3809158.271 |
| Black-necked Crane | -10975194.990 | 3561501.916 |
| Black-necked Crane | -11044394.990 | 3627525.901 |
