# Supplementary material for: Why choose Random Forest to predict rare species distribution with few samples in large undersampled areas? Three Asian crane species models provide supporting evidence
Source: PeerJ journal article supplement (doi:10.7717/peerj.2849), 2017-01-12
Supplement: PresencePoint.pdf [file PresencePoint.pdf]

| Species           | X            | Y           |
|-------------------|--------------|-------------|
| Hooded Crane      | -5829746.073 | 6207759.267 |
| Hooded Crane      | -5829585.328 | 6208657.913 |
| Hooded Crane      | -5797488.134 | 6227852.033 |
| Hooded Crane      | -5829987.302 | 6208030.760 |
| Hooded Crane      | -5781068.509 | 6142620.139 |
| Hooded Crane      | -5842485.921 | 6203908.415 |
| Hooded Crane      | -5611417.605 | 6123943.226 |
| Hooded Crane      | -5617728.863 | 6130609.536 |
| Hooded Crane      | -5619284.219 | 6128828.836 |
| Hooded Crane      | -5720284.950 | 6120514.903 |
| Hooded Crane      | -5784340.077 | 6224291.890 |
| Hooded Crane      | -5819619.116 | 6221408.445 |
| Hooded Crane      | -5792042.829 | 6160425.921 |
| Hooded Crane      | -5611176.487 | 6124017.462 |
| Hooded Crane      | -5787840.519 | 6132186.387 |
| Hooded Crane      | -5819498.446 | 6221338.071 |
| Hooded Crane      | -5791838.670 | 6235291.265 |
| Hooded Crane      | -5794303.172 | 6134867.908 |
| Hooded Crane      | -5774111.041 | 6120769.541 |
| Hooded Crane      | -5774114.158 | 6120769.541 |
| Hooded Crane      | -5783474.234 | 6228203.841 |
| Hooded Crane      | -5793313.653 | 6234544.645 |
| Hooded Crane      | -5607765.769 | 6127433.351 |
| Hooded Crane      | -5786009.870 | 6134566.244 |
| Hooded Crane      | -5789717.477 | 6234258.151 |
| Hooded Crane      | -5788919.650 | 6235516.600 |
| Hooded Crane      | -5783165.100 | 6229325.230 |
| Hooded Crane      | -5780978.897 | 6116184.908 |
| Hooded Crane      | -5782546.609 | 6134213.649 |
| Hooded Crane      | -5846901.631 | 6208573.661 |
| Hooded Crane      | -5780480.965 | 6114421.236 |
| Hooded Crane      | -5781247.844 | 6116092.407 |
| Hooded Crane      | -5231700.699 | 6246003.976 |
| White-naped Crane | -6185993.179 | 5944318.022 |
| White-naped Crane | -6205239.707 | 5946496.282 |
| White-naped Crane | -6215239.904 | 5937819.195 |
| White-naped Crane | -6206191.488 | 5947738.136 |
| White-naped Crane | -6215093.329 | 5938208.226 |
| White-naped Crane | -6197792.433 | 5939035.311 |
| White-naped Crane | -6209653.524 | 5936589.651 |
| White-naped Crane | -5273235.226 | 5872610.731 |
| White-naped Crane | -5276358.294 | 5870316.158 |
| White-naped Crane | -5301411.413 | 5865971.317 |
| White-naped Crane | -5299800.398 | 5865903.978 |
| White-naped Crane | -5301157.828 | 5864829.365 |
| White-naped Crane | -6205505.014 | 5946854.004 |
| White-naped Crane | -6204818.507 | 5944094.837 |
| White-naped Crane | -6206559.432 | 5943718.173 |
| White-naped Crane | -6203621.822 | 5944557.604 |
| White-naped Crane | -6208513.757 | 5950631.097 |
| White-naped Crane | -6204286.734 | 5948501.692 |
| White-naped Crane | -5860111.581 | 6183532.074 |
| White-naped Crane | -5839928.690 | 6208568.943 |
| White-naped Crane | -6167699.691 | 5923617.166 |
| White-naped Crane | -6176614.156 | 5926442.160 |
| White-naped Crane | -6178343.949 | 5924248.158 |
| White-naped Crane | -6180828.266 | 5926565.723 |

|                    |              |             |
|--------------------|--------------|-------------|
| White-naped Crane  | -6182434.718 | 5930175.904 |
| White-naped Crane  | -6181183.598 | 5931920.231 |
| White-naped Crane  | -6188471.240 | 5925776.615 |
| White-naped Crane  | -6196568.508 | 5930435.533 |
| White-naped Crane  | -6195872.205 | 5926712.925 |
| White-naped Crane  | -6189023.496 | 5934325.517 |
| White-naped Crane  | -6185243.976 | 5938793.163 |
| White-naped Crane  | -6179814.925 | 5941651.713 |
| White-naped Crane  | -6104709.779 | 5885088.115 |
| White-naped Crane  | -6102307.950 | 5884734.293 |
| White-naped Crane  | -5144481.878 | 5786307.907 |
| White-naped Crane  | -5869258.258 | 6170018.688 |
| White-naped Crane  | -5869258.258 | 6170857.398 |
| White-naped Crane  | -5791705.754 | 6136538.443 |
| White-naped Crane  | -5840810.006 | 6210043.479 |
| White-naped Crane  | -5858002.633 | 6216365.850 |
| Black-necked Crane | -9048070.166 | 4176962.818 |
| Black-necked Crane | -8650487.037 | 3825222.745 |
| Black-necked Crane | -8629573.199 | 3844535.335 |
| Black-necked Crane | -8616037.061 | 3880253.350 |
| Black-necked Crane | -8622692.730 | 3906065.919 |
| Black-necked Crane | -8625944.184 | 3913251.051 |
| Black-necked Crane | -8625865.336 | 3913848.788 |
| Black-necked Crane | -8612547.506 | 3932729.107 |
| Black-necked Crane | -8602935.680 | 3939477.357 |
| Black-necked Crane | -8584012.291 | 3944250.817 |
| Black-necked Crane | -8577697.392 | 3967727.105 |
| Black-necked Crane | -8580713.527 | 3986422.522 |
| Black-necked Crane | -8609259.551 | 3999901.077 |
| Black-necked Crane | -8609466.428 | 3999658.007 |
| Black-necked Crane | -8630198.447 | 3742674.402 |
| Black-necked Crane | -8646049.719 | 4033972.417 |
| Black-necked Crane | -8644825.828 | 4033639.276 |
| Black-necked Crane | -8644313.135 | 4036081.677 |
| Black-necked Crane | -8641422.235 | 4035069.808 |
| Black-necked Crane | -8747599.377 | 4138414.916 |
| Black-necked Crane | -8947225.530 | 4405316.168 |
| Black-necked Crane | -8945432.359 | 4403884.742 |
| Black-necked Crane | -8946953.726 | 4401514.231 |
| Black-necked Crane | -8944786.706 | 4405367.403 |
| Black-necked Crane | -8941867.352 | 4407725.300 |
| Black-necked Crane | -8851827.204 | 4419699.048 |
| Black-necked Crane | -8853454.940 | 4420316.672 |
| Black-necked Crane | -8855256.769 | 4421335.579 |
| Black-necked Crane | -8856292.964 | 4421935.549 |
| Black-necked Crane | -8856023.326 | 4422073.683 |
| Black-necked Crane | -8855714.102 | 4422033.554 |
| Black-necked Crane | -8854385.070 | 4423849.126 |
| Black-necked Crane | -8852620.968 | 4423267.182 |
| Black-necked Crane | -8874711.397 | 4417280.988 |
| Black-necked Crane | -8853125.924 | 4424535.306 |
| Black-necked Crane | -8820745.867 | 4353153.313 |
| Black-necked Crane | -8820618.162 | 4353337.695 |
| Black-necked Crane | -8820100.526 | 4352165.908 |
| Black-necked Crane | -8853641.089 | 4333664.909 |
| Black-necked Crane | -9373216.774 | 4707686.881 |
| Black-necked Crane | -9375929.567 | 4718866.788 |
| Black-necked Crane | -9371217.970 | 4716238.225 |

|                    |               |             |
|--------------------|---------------|-------------|
| Black-necked Crane | -9369514.164  | 4715945.146 |
| Black-necked Crane | -9375349.160  | 4719047.135 |
| Black-necked Crane | -9377646.670  | 4719039.189 |
| Black-necked Crane | -9385390.178  | 4723755.578 |
| Black-necked Crane | -9372666.669  | 4716586.913 |
| Black-necked Crane | -9371076.656  | 4716436.793 |
| Black-necked Crane | -9370208.982  | 4715091.773 |
| Black-necked Crane | -9371029.346  | 4716430.042 |
| Black-necked Crane | -9370872.261  | 4716480.875 |
| Black-necked Crane | -9373019.491  | 4716625.437 |
| Black-necked Crane | -9376384.740  | 4719184.979 |
| Black-necked Crane | -9377286.428  | 4719130.953 |
| Black-necked Crane | -9361240.343  | 4698441.153 |
| Black-necked Crane | -9378217.183  | 4708132.489 |
| Black-necked Crane | -9384186.382  | 4716910.592 |
| Black-necked Crane | -9552412.087  | 4541148.039 |
| Black-necked Crane | -10261304.808 | 3270358.041 |
| Black-necked Crane | -10251421.493 | 3270987.453 |
| Black-necked Crane | -10253612.941 | 3267494.090 |
| Black-necked Crane | -10255471.667 | 3264042.866 |
| Black-necked Crane | -10255883.240 | 3264520.373 |
| Black-necked Crane | -10257171.145 | 3263673.307 |
| Black-necked Crane | -10256152.571 | 3264151.849 |
| Black-necked Crane | -10256902.432 | 3265490.111 |
| Black-necked Crane | -10257269.786 | 3264664.292 |
| Black-necked Crane | -10259174.278 | 3261814.493 |
| Black-necked Crane | -10262642.188 | 3269873.334 |
| Black-necked Crane | -10258587.685 | 3266834.448 |
| Black-necked Crane | -10397579.037 | 3298745.989 |
| Black-necked Crane | -10397521.522 | 3300125.944 |
| Black-necked Crane | -10397973.603 | 3303748.839 |
| Black-necked Crane | -10363436.731 | 3303429.317 |
| Black-necked Crane | -10347018.652 | 3314738.899 |
