# Supplementary material for: Why choose Random Forest to predict rare species distribution with few samples in large undersampled areas? Three Asian crane species models provide supporting evidence
Source: PeerJ journal article supplement (doi:10.7717/peerj.2849), 2017-01-12
Supplement: Satellite_Point.pdf [file Satellite_Point.pdf]

| Species      | X            | Y           |
|--------------|--------------|-------------|
| Hooded Crane | -4812704.489 | 6737836.289 |
| Hooded Crane | -5103804.957 | 7213595.239 |
| Hooded Crane | -4812165.702 | 6737025.829 |
| Hooded Crane | -5100340.694 | 7214352.933 |
| Hooded Crane | -5101133.289 | 7211522.932 |
| Hooded Crane | -5101881.356 | 7212459.791 |
| Hooded Crane | -5101204.534 | 7208270.56  |
| Hooded Crane | -5018796.941 | 7273043.067 |
| Hooded Crane | -5100262.771 | 7214162.071 |
| Hooded Crane | -5098840.108 | 7213461.648 |
| Hooded Crane | -4812185.74  | 6737158.804 |
| Hooded Crane | -4812541.962 | 6735002.731 |
| Hooded Crane | -4812154.57  | 6736928.795 |
| Hooded Crane | -5101001.932 | 7212828.078 |
| Hooded Crane | -4812722.3   | 6736679.028 |
| Hooded Crane | -4985982.182 | 7283255.694 |
| Hooded Crane | -4812159.023 | 6736989.89  |
| Hooded Crane | -4812179.061 | 6737085.128 |
| Hooded Crane | -5105730.784 | 7227969.625 |
| Hooded Crane | -4813094.107 | 6735252.447 |
| Hooded Crane | -4812653.282 | 6736274.744 |
| Hooded Crane | -5100347.374 | 7209542.734 |
| Hooded Crane | -4810386.817 | 6737581.102 |
| Hooded Crane | -5015443.998 | 7273689.257 |
| Hooded Crane | -4812225.815 | 6737076.143 |
| Hooded Crane | -4812196.872 | 6737110.286 |
| Hooded Crane | -4812141.212 | 6737024.032 |
| Hooded Crane | -4812450.68  | 6736290.915 |
| Hooded Crane | -4812744.564 | 6736849.731 |
| Hooded Crane | -5020687.146 | 7268951.782 |
| Hooded Crane | -5099982.246 | 7209609.495 |
| Hooded Crane | -4810771.982 | 6737155.21  |
| Hooded Crane | -5016018.407 | 7268494.338 |
| Hooded Crane | -4810932.282 | 6737277.404 |
| Hooded Crane | -4814116.02  | 6735176.993 |
| Hooded Crane | -4817553.566 | 6741183.219 |
| Hooded Crane | -5093507.904 | 7222910.253 |
| Hooded Crane | -4812435.095 | 6735288.378 |
| Hooded Crane | -5102268.748 | 7215011.442 |
| Hooded Crane | -4814614.731 | 6734612.903 |
| Hooded Crane | -5093527.942 | 7223273.302 |
| Hooded Crane | -4978975.733 | 7271195.185 |
| Hooded Crane | -5020286.396 | 7269799.47  |
| Hooded Crane | -5101847.96  | 7213478.824 |
| Hooded Crane | -4812132.306 | 6737040.205 |
| Hooded Crane | -5017904.159 | 7270260.836 |
| Hooded Crane | -4812234.72  | 6737092.316 |
| Hooded Crane | -5016661.833 | 7269069.031 |
| Hooded Crane | -4812156.797 | 6737031.22  |
| Hooded Crane | -4810124.103 | 6736970.124 |
| Hooded Crane | -4812063.288 | 6737216.307 |
| Hooded Crane | -4812156.797 | 6737056.377 |
| Hooded Crane | -5019139.805 | 7269628.387 |
| Hooded Crane | -4812058.835 | 6735383.596 |
| Hooded Crane | -4812116.722 | 6737038.408 |
| Hooded Crane | -5093242.964 | 7222877.771 |
| Hooded Crane | -5004964.381 | 7268811.471 |

|              |              |             |
|--------------|--------------|-------------|
| Hooded Crane | -4973888.432 | 7259291.605 |
| Hooded Crane | -5017213.978 | 7269755.257 |
| Hooded Crane | -5004968.834 | 7268805.705 |
| Hooded Crane | -5005402.98  | 7268840.302 |
| Hooded Crane | -5019257.804 | 7270539.591 |
| Hooded Crane | -4809968.255 | 6737561.334 |
| Hooded Crane | -4812181.287 | 6737036.611 |
| Hooded Crane | -4812167.929 | 6737106.692 |
| Hooded Crane | -4812163.476 | 6737074.346 |
| Hooded Crane | -4812216.909 | 6735804.004 |
| Hooded Crane | -5018565.396 | 7269526.508 |
| Hooded Crane | -5102506.972 | 7211732.809 |
| Hooded Crane | -4812154.57  | 6737013.25  |
| Hooded Crane | -4812156.797 | 6737092.316 |
| Hooded Crane | -4812154.57  | 6737074.346 |
| Hooded Crane | -5100351.826 | 7212305.23  |
| Hooded Crane | -4809921.501 | 6737487.655 |
| Hooded Crane | -4812147.891 | 6737013.25  |
| Hooded Crane | -5017429.938 | 7269357.354 |
| Hooded Crane | -4812078.873 | 6735895.635 |
| Hooded Crane | -5019870.061 | 7272233.483 |
| Hooded Crane | -5100325.11  | 7214341.481 |
| Hooded Crane | -5005774.787 | 7263258.718 |
| Hooded Crane | -5016748.662 | 7266639.852 |
| Hooded Crane | -4809859.162 | 6737489.452 |
| Hooded Crane | -5094565.439 | 7220506.914 |
| Hooded Crane | -4812550.868 | 6734986.563 |
| Hooded Crane | -5004944.344 | 7268824.925 |
| Hooded Crane | -5016394.666 | 7268921.029 |
| Hooded Crane | -5017830.688 | 7270033.994 |
| Hooded Crane | -4812150.117 | 6735715.968 |
| Hooded Crane | -4812181.287 | 6737047.392 |
| Hooded Crane | -4812161.249 | 6737059.971 |
| Hooded Crane | -5016842.171 | 7272654.61  |
| Hooded Crane | -4813062.937 | 6734857.217 |
| Hooded Crane | -4812161.249 | 6737083.331 |
| Hooded Crane | -4812123.401 | 6737058.174 |
| Hooded Crane | -4812562     | 6735534.509 |
| Hooded Crane | -5016332.327 | 7272271.941 |
| Hooded Crane | -5017423.258 | 7265953.901 |
| Hooded Crane | -5004953.249 | 7268803.783 |
| Hooded Crane | -5004951.023 | 7268807.627 |
| Hooded Crane | -5016254.404 | 7270158.948 |
| Hooded Crane | -5102190.824 | 7215074.433 |
| Hooded Crane | -5016606.173 | 7275495.411 |
| Hooded Crane | -4812150.117 | 6737088.722 |
| Hooded Crane | -5016715.267 | 7268603.892 |
| Hooded Crane | -5016434.741 | 7272233.483 |
| Hooded Crane | -5017621.407 | 7265519.689 |
| Hooded Crane | -5016630.664 | 7269197.814 |
| Hooded Crane | -5103379.717 | 7215578.377 |
| Hooded Crane | -4812167.929 | 6737065.362 |
| Hooded Crane | -5017178.356 | 7269718.734 |
| Hooded Crane | -5101925.884 | 7212467.424 |
| Hooded Crane | -4810627.267 | 6737295.374 |
| Hooded Crane | -5100278.355 | 7208968.609 |
| Hooded Crane | -5016690.776 | 7272104.65  |
| Hooded Crane | -4810616.135 | 6737257.637 |

|              |              |             |
|--------------|--------------|-------------|
| Hooded Crane | -5015711.165 | 7274866.383 |
| Hooded Crane | -5016254.404 | 7269962.867 |
| Hooded Crane | -5016457.005 | 7268676.928 |
| Hooded Crane | -4812023.213 | 6735489.594 |
| Hooded Crane | -4812105.59  | 6736984.5   |
| Hooded Crane | -5020517.94  | 7273291.152 |
| Hooded Crane | -5016042.897 | 7268705.759 |
| Hooded Crane | -4813461.461 | 6734744.042 |
| Hooded Crane | -4812372.756 | 6735694.408 |
| Hooded Crane | -5015510.79  | 7268573.14  |
| Hooded Crane | -4811958.648 | 6735629.73  |
| Hooded Crane | -5019469.311 | 7270360.802 |
| Hooded Crane | -5016632.89  | 7273756.571 |
| Hooded Crane | -5016813.228 | 7270007.081 |
| Hooded Crane | -4813074.069 | 6735259.633 |
| Hooded Crane | -4812192.419 | 6737088.722 |
| Hooded Crane | -5023414.473 | 7269664.91  |
| Hooded Crane | -5018937.204 | 7273087.299 |
| Hooded Crane | -5016748.662 | 7269094.018 |
| Hooded Crane | -5015584.261 | 7273898.895 |
| Hooded Crane | -4963025.876 | 7249511.133 |
| Hooded Crane | -4812134.533 | 6737126.458 |
| Hooded Crane | -5018458.53  | 7273468.085 |
| Hooded Crane | -4812626.565 | 6735671.052 |
| Hooded Crane | -5016136.405 | 7273820.04  |
| Hooded Crane | -5015492.979 | 7266197.916 |
| Hooded Crane | -5106173.836 | 7214702.222 |
| Hooded Crane | -5015150.114 | 7269440.008 |
| Hooded Crane | -5017830.688 | 7270255.068 |
| Hooded Crane | -5019507.159 | 7275162.616 |
| Hooded Crane | -5102146.297 | 7215311.13  |
| Hooded Crane | -5018235.891 | 7269499.597 |
| Hooded Crane | -5012939.309 | 7279738.354 |
| Hooded Crane | -4811255.109 | 6737002.469 |
| Hooded Crane | -4814140.51  | 6734842.846 |
| Hooded Crane | -5009152.22  | 7266368.923 |
| Hooded Crane | -4812165.702 | 6737076.143 |
| Hooded Crane | -4812172.381 | 6737067.159 |
| Hooded Crane | -5019440.368 | 7270360.802 |
| Hooded Crane | -5004975.513 | 7268815.315 |
| Hooded Crane | -5005910.597 | 7269119.006 |
| Hooded Crane | -5017810.65  | 7270095.51  |
| Hooded Crane | -4963166.139 | 7249361.586 |
| Hooded Crane | -5018389.512 | 7268628.878 |
| Hooded Crane | -5019280.068 | 7272969.99  |
| Hooded Crane | -5015942.709 | 7273887.356 |
| Hooded Crane | -5013520.397 | 7288468.218 |
| Hooded Crane | -4813332.33  | 6735115.911 |
| Hooded Crane | -4811308.542 | 6736700.59  |
| Hooded Crane | -5102083.958 | 7212818.536 |
| Hooded Crane | -5004964.381 | 7268650.02  |
| Hooded Crane | -4812165.702 | 6737094.113 |
| Hooded Crane | -5016666.286 | 7266238.266 |
| Hooded Crane | -4814222.886 | 6734431.469 |
| Hooded Crane | -4812069.967 | 6735883.058 |
| Hooded Crane | -4810228.743 | 6736238.809 |
| Hooded Crane | -5017959.818 | 7275772.431 |
| Hooded Crane | -4810371.232 | 6737523.596 |

|              |              |             |
|--------------|--------------|-------------|
| Hooded Crane | -4814307.489 | 6735556.068 |
| Hooded Crane | -4812152.344 | 6737090.519 |
| Hooded Crane | -5016174.254 | 7266169.095 |
| Hooded Crane | -5021199.216 | 7271512.428 |
| Hooded Crane | -4812159.023 | 6737095.91  |
| Hooded Crane | -5017162.771 | 7269749.49  |
| Hooded Crane | -5016615.079 | 7271962.359 |
| Hooded Crane | -5018084.496 | 7271870.063 |
| Hooded Crane | -5018013.252 | 7268213.735 |
| Hooded Crane | -5016209.876 | 7272594.997 |
| Hooded Crane | -5018705.659 | 7270362.724 |
| Hooded Crane | -5018373.927 | 7273339.231 |
| Hooded Crane | -5018607.698 | 7269386.187 |
| Hooded Crane | -4810898.886 | 6736982.703 |
| Hooded Crane | -5017768.349 | 7266199.837 |
| Hooded Crane | -5016318.969 | 7269332.365 |
| Hooded Crane | -5018609.924 | 7269370.809 |
| Hooded Crane | -5018721.244 | 7272679.609 |
| Hooded Crane | -4810471.42  | 6737588.29  |
| Hooded Crane | -5015395.017 | 7277569.449 |
| Hooded Crane | -4812495.208 | 6736154.361 |
| Hooded Crane | -5099254.216 | 7212448.342 |
| Hooded Crane | -5017278.543 | 7267358.533 |
| Hooded Crane | -5016719.719 | 7266576.443 |
| Hooded Crane | -5016027.312 | 7268671.162 |
| Hooded Crane | -4812617.659 | 6736991.687 |
| Hooded Crane | -4812147.891 | 6737068.956 |
| Hooded Crane | -5014361.973 | 7283796.817 |
| Hooded Crane | -5018897.129 | 7269451.542 |
| Hooded Crane | -5016372.403 | 7271983.51  |
| Hooded Crane | -4810458.061 | 6737636.811 |
| Hooded Crane | -4812132.306 | 6737090.519 |
| Hooded Crane | -4991519.213 | 7287208.107 |
| Hooded Crane | -5103330.736 | 7215206.142 |
| Hooded Crane | -4812236.947 | 6735926.178 |
| Hooded Crane | -4871679.328 | 6903821.009 |
| Hooded Crane | -4812163.476 | 6737056.377 |
| Hooded Crane | -5019184.333 | 7273123.838 |
| Hooded Crane | -4812147.891 | 6735811.191 |
| Hooded Crane | -5019148.711 | 7274416.284 |
| Hooded Crane | -4812147.891 | 6737104.895 |
| Hooded Crane | -4812323.776 | 6736573.013 |
| Hooded Crane | -5100785.972 | 7214664.048 |
| Hooded Crane | -5018832.563 | 7269345.821 |
| Hooded Crane | -5100109.15  | 7209346.268 |
| Hooded Crane | -5021526.495 | 7272698.839 |
| Hooded Crane | -4812159.023 | 6737095.91  |
| Hooded Crane | -4814271.867 | 6734806.917 |
| Hooded Crane | -5004935.438 | 7268798.016 |
| Hooded Crane | -5017808.424 | 7268832.614 |
| Hooded Crane | -5015232.491 | 7281047.304 |
| Hooded Crane | -4812147.891 | 6737052.783 |
| Hooded Crane | -5019119.768 | 7273104.607 |
| Hooded Crane | -5018988.411 | 7272893.067 |
| Hooded Crane | -4812833.619 | 6737006.063 |
| Hooded Crane | -5019079.693 | 7273177.686 |
| Hooded Crane | -5018344.984 | 7272589.228 |
| Hooded Crane | -5015766.824 | 7273727.722 |

|              |              |             |
|--------------|--------------|-------------|
| Hooded Crane | -5017144.96  | 7269566.875 |
| Hooded Crane | -5019471.537 | 7275151.075 |
| Hooded Crane | -5017167.224 | 7271222.102 |
| Hooded Crane | -4812138.986 | 6737108.489 |
| Hooded Crane | -5023806.318 | 7269388.109 |
| Hooded Crane | -5099545.873 | 7211171.878 |
| Hooded Crane | -5074047.031 | 7240451.49  |
| Hooded Crane | -4812143.438 | 6737076.143 |
| Hooded Crane | -5023394.436 | 7269620.698 |
| Hooded Crane | -5018144.609 | 7268161.843 |
| Hooded Crane | -5015833.616 | 7273681.564 |
| Hooded Crane | -5017098.206 | 7269553.42  |
| Hooded Crane | -4812138.986 | 6737058.174 |
| Hooded Crane | -5018436.266 | 7273439.237 |
| Hooded Crane | -5016027.312 | 7268594.282 |
| Hooded Crane | -5019068.561 | 7273044.99  |
| Hooded Crane | -5101208.986 | 7214973.266 |
| Hooded Crane | -4812112.269 | 6736979.109 |
| Hooded Crane | -4812147.891 | 6737113.879 |
| Hooded Crane | -5019010.674 | 7273760.418 |
| Hooded Crane | -4812156.797 | 6737054.58  |
| Hooded Crane | -5019442.594 | 7270331.965 |
| Hooded Crane | -4809966.029 | 6737451.715 |
| Hooded Crane | -5019244.445 | 7273852.736 |
| Hooded Crane | -5022154.337 | 7270478.071 |
| Hooded Crane | -5020232.962 | 7273294.998 |
| Hooded Crane | -4812163.476 | 6737063.565 |
| Hooded Crane | -5016730.851 | 7266699.42  |
| Hooded Crane | -5019070.787 | 7272943.067 |
| Hooded Crane | -5016630.664 | 7271870.063 |
| Hooded Crane | -4813042.9   | 6734945.244 |
| Hooded Crane | -5015570.902 | 7273760.418 |
| Hooded Crane | -4810355.647 | 6737557.74  |
| Hooded Crane | -4812141.212 | 6737079.737 |
| Hooded Crane | -4812154.57  | 6737076.143 |
| Hooded Crane | -5019382.482 | 7272829.606 |
| Hooded Crane | -5016009.501 | 7271131.738 |
| Hooded Crane | -5019705.308 | 7270041.684 |
| Hooded Crane | -5017149.413 | 7268156.078 |
| Hooded Crane | -5015185.737 | 7268417.46  |
| Hooded Crane | -4814069.265 | 6735135.673 |
| Hooded Crane | -4814225.113 | 6734530.269 |
| Hooded Crane | -5017465.56  | 7268926.795 |
| Hooded Crane | -4870490.436 | 6904516.425 |
| Hooded Crane | -5016160.895 | 7269270.856 |
| Hooded Crane | -5015875.918 | 7272677.686 |
| Hooded Crane | -4810188.668 | 6737473.279 |
| Hooded Crane | -4813105.239 | 6734920.094 |
| Hooded Crane | -5100267.224 | 7214297.582 |
| Hooded Crane | -5017118.243 | 7269545.731 |
| Hooded Crane | -5015806.899 | 7273685.41  |
| Hooded Crane | -5100282.808 | 7208781.693 |
| Hooded Crane | -5017291.901 | 7269826.382 |
| Hooded Crane | -4812152.344 | 6737085.128 |
| Hooded Crane | -5017365.372 | 7268907.574 |
| Hooded Crane | -5016902.283 | 7271883.523 |
| Hooded Crane | -5016123.047 | 7272391.163 |
| Hooded Crane | -5020544.657 | 7272729.608 |

|              |              |             |
|--------------|--------------|-------------|
| Hooded Crane | -5016817.68  | 7270066.674 |
| Hooded Crane | -5016697.455 | 7275655.081 |
| Hooded Crane | -4812156.797 | 6735841.734 |
| Hooded Crane | -5018338.305 | 7268480.884 |
| Hooded Crane | -5011648.003 | 7277242.338 |
| Hooded Crane | -5015208.001 | 7269403.486 |
| Hooded Crane | -5016174.254 | 7271852.758 |
| Hooded Crane | -4812161.249 | 6737079.737 |
| Hooded Crane | -4812159.023 | 6737068.956 |
| Hooded Crane | -5101997.128 | 7212660.152 |
| Hooded Crane | -5016180.933 | 7266169.095 |
| Hooded Crane | -4813143.087 | 6735410.544 |
| Hooded Crane | -5015831.39  | 7273954.672 |
| Hooded Crane | -5020655.977 | 7273235.38  |
| Hooded Crane | -5017051.451 | 7269737.957 |
| Hooded Crane | -4812161.249 | 6737058.174 |
| Hooded Crane | -5018545.359 | 7272756.53  |
| Hooded Crane | -5018547.585 | 7271898.905 |
| Hooded Crane | -4812138.986 | 6737086.925 |
| Hooded Crane | -4809859.162 | 6737457.106 |
| Hooded Crane | -5100445.335 | 7208835.097 |
| Hooded Crane | -4814741.635 | 6734788.952 |
| Hooded Crane | -5100966.31  | 7212875.785 |
| Hooded Crane | -5019716.44  | 7270045.528 |
| Hooded Crane | -4872017.74  | 6903894.401 |
| Hooded Crane | -5006324.705 | 7270258.913 |
| Hooded Crane | -5017405.447 | 7268223.344 |
| Hooded Crane | -4814162.774 | 6734779.97  |
| Hooded Crane | -5016908.962 | 7268377.099 |
| Hooded Crane | -4812152.344 | 6737033.017 |
| Hooded Crane | -5016485.948 | 7269332.365 |
| Hooded Crane | -4812156.797 | 6737059.971 |
| Hooded Crane | -5017877.442 | 7270203.163 |
| Hooded Crane | -5015840.295 | 7271435.52  |
| Hooded Crane | -5016296.705 | 7272425.776 |
| Hooded Crane | -5015513.016 | 7273758.495 |
| Hooded Crane | -5101155.553 | 7214938.908 |
| Hooded Crane | -5016859.982 | 7269318.91  |
| Hooded Crane | -5015804.673 | 7271429.751 |
| Hooded Crane | -4812154.57  | 6737094.113 |
| Hooded Crane | -4812145.665 | 6737090.519 |
| Hooded Crane | -5020698.278 | 7269013.289 |
| Hooded Crane | -5016492.628 | 7267252.841 |
| Hooded Crane | -4812147.891 | 6737094.113 |
| Hooded Crane | -5018438.492 | 7273464.238 |
| Hooded Crane | -4812145.665 | 6737074.346 |
| Hooded Crane | -5100405.26  | 7211889.267 |
| Hooded Crane | -5015446.224 | 7273827.733 |
| Hooded Crane | -4812156.797 | 6737099.504 |
| Hooded Crane | -5018487.473 | 7269464.997 |
| Hooded Crane | -5016730.851 | 7266687.891 |
| Hooded Crane | -5015642.147 | 7273889.279 |
| Hooded Crane | -5019738.704 | 7270133.957 |
| Hooded Crane | -5015606.524 | 7273902.742 |
| Hooded Crane | -4809634.297 | 6737397.804 |
| Hooded Crane | -4812047.704 | 6735403.358 |
| Hooded Crane | -4812372.756 | 6736163.345 |
| Hooded Crane | -5018507.51  | 7269468.842 |

|              |              |             |
|--------------|--------------|-------------|
| Hooded Crane | -4854680.842 | 6956939.289 |
| Hooded Crane | -5106659.189 | 7212351.025 |
| Hooded Crane | -4813710.817 | 6735018.9   |
| Hooded Crane | -5015838.069 | 7273679.641 |
| Hooded Crane | -4809892.558 | 6737415.774 |
| Hooded Crane | -5015301.509 | 7287057.832 |
| Hooded Crane | -4812239.173 | 6737103.098 |
| Hooded Crane | -5023797.413 | 7269343.898 |
| Hooded Crane | -5015610.977 | 7274064.302 |
| Hooded Crane | -5018071.138 | 7268148.39  |
| Hooded Crane | -5016739.757 | 7266691.734 |
| Hooded Crane | -5017697.104 | 7270064.752 |
| Hooded Crane | -4991668.381 | 7286021.401 |
| Hooded Crane | -4812159.023 | 6737088.722 |
| Hooded Crane | -5106543.416 | 7212102.97  |
| Hooded Crane | -4812210.23  | 6737058.174 |
| Hooded Crane | -4811969.78  | 6735412.341 |
| Hooded Crane | -5017160.544 | 7268121.484 |
| Hooded Crane | -5017405.447 | 7272123.878 |
| Hooded Crane | -5015751.24  | 7273708.49  |
| Hooded Crane | -4809819.087 | 6737708.694 |
| Hooded Crane | -5013694.056 | 7278387.288 |
| Hooded Crane | -4812691.13  | 6735189.568 |
| Hooded Crane | -5014927.476 | 7281053.079 |
| Hooded Crane | -5015742.334 | 7273702.72  |
| Hooded Crane | -5018672.263 | 7274447.06  |
| Hooded Crane | -4813298.935 | 6735133.876 |
| Hooded Crane | -5020028.135 | 7272212.331 |
| Hooded Crane | -5019280.068 | 7273002.682 |
| Hooded Crane | -5019718.666 | 7270045.528 |
| Hooded Crane | -5015573.129 | 7273898.895 |
| Hooded Crane | -5019444.82  | 7275029.887 |
| Hooded Crane | -5017202.846 | 7269743.724 |
| Hooded Crane | -4810938.961 | 6736973.718 |
| Hooded Crane | -5016713.04  | 7269372.731 |
| Hooded Crane | -5100734.765 | 7207955.886 |
| Hooded Crane | -5093483.414 | 7223173.94  |
| Hooded Crane | -5099634.929 | 7210044.413 |
| Hooded Crane | -5017826.235 | 7270062.83  |
| Hooded Crane | -5104586.42  | 7213079.973 |
| Hooded Crane | -4812150.117 | 6737067.159 |
| Hooded Crane | -4812121.174 | 6737092.316 |
| Hooded Crane | -5017156.092 | 7269674.522 |
| Hooded Crane | -5017196.167 | 7269753.335 |
| Hooded Crane | -4810638.399 | 6737252.246 |
| Hooded Crane | -5101725.509 | 7212539.935 |
| Hooded Crane | -5017921.97  | 7270205.086 |
| Hooded Crane | -4812161.249 | 6737061.768 |
| Hooded Crane | -5019266.709 | 7273237.303 |
| Hooded Crane | -5016454.779 | 7269378.498 |
| Hooded Crane | -5015619.883 | 7269807.159 |
| Hooded Crane | -5018741.281 | 7271941.207 |
| Hooded Crane | -5017138.281 | 7270316.586 |
| Hooded Crane | -4812167.929 | 6737065.362 |
| Hooded Crane | -5018654.452 | 7272971.913 |
| Hooded Crane | -5019854.476 | 7270033.994 |
| Hooded Crane | -5100151.451 | 7208598.597 |
| Hooded Crane | -4812354.945 | 6737068.956 |

|              |              |             |
|--------------|--------------|-------------|
| Hooded Crane | -5021880.491 | 7273785.421 |
| Hooded Crane | -5016741.983 | 7266691.734 |
| Hooded Crane | -5102132.938 | 7212793.729 |
| Hooded Crane | -4812179.061 | 6737068.956 |
| Hooded Crane | -5016775.379 | 7272764.222 |
| Hooded Crane | -4812190.192 | 6737103.098 |
| Hooded Crane | -4812154.57  | 6737054.58  |
| Hooded Crane | -5015610.977 | 7271668.17  |
| Hooded Crane | -5099652.74  | 7211137.536 |
| Hooded Crane | -5018494.152 | 7269366.965 |
| Hooded Crane | -4812163.476 | 6737090.519 |
| Hooded Crane | -4812138.986 | 6737047.392 |
| Hooded Crane | -5018877.091 | 7272485.387 |
| Hooded Crane | -5018467.435 | 7273471.931 |
| Hooded Crane | -5018881.544 | 7273854.659 |
| Hooded Crane | -4812163.476 | 6737074.346 |
| Hooded Crane | -5020684.92  | 7273231.534 |
| Hooded Crane | -5017563.521 | 7269812.926 |
| Hooded Crane | -4814245.15  | 6734528.473 |
| Hooded Crane | -5016960.169 | 7268984.458 |
| Hooded Crane | -4814345.338 | 6734790.749 |
| Hooded Crane | -4812159.023 | 6737072.55  |
| Hooded Crane | -5016367.95  | 7268901.808 |
| Hooded Crane | -4813310.067 | 6735092.556 |
| Hooded Crane | -4812012.081 | 6735437.493 |
| Hooded Crane | -5018044.421 | 7272043.118 |
| Hooded Crane | -4812020.987 | 6735439.289 |
| Hooded Crane | -5014671.441 | 7280795.121 |
| Hooded Crane | -5013084.025 | 7279143.625 |
| Hooded Crane | -5023801.865 | 7269351.587 |
| Hooded Crane | -4810397.949 | 6737505.626 |
| Hooded Crane | -5019219.955 | 7270593.42  |
| Hooded Crane | -5093394.358 | 7223001.969 |
| Hooded Crane | -5074033.672 | 7240371.058 |
| Hooded Crane | -5074323.103 | 7240485.961 |
| Hooded Crane | -4812152.344 | 6737070.753 |
| Hooded Crane | -5020684.92  | 7269113.239 |
| Hooded Crane | -5021439.666 | 7268946.016 |
| Hooded Crane | -5100647.936 | 7214059.008 |
| Hooded Crane | -5015455.13  | 7273989.292 |
| Hooded Crane | -4810958.999 | 6736928.795 |
| Hooded Crane | -5017739.406 | 7268690.382 |
| Hooded Crane | -5016844.397 | 7266883.889 |
| Hooded Crane | -5023049.346 | 7272744.992 |
| Hooded Crane | -4814229.566 | 6735457.255 |
| Hooded Crane | -4816088.601 | 6734803.324 |
| Hooded Crane | -4814291.904 | 6734727.874 |
| Hooded Crane | -4813882.249 | 6734611.107 |
| Hooded Crane | -4811831.744 | 6737570.32  |
| Hooded Crane | -5020324.244 | 7269445.775 |
| Hooded Crane | -5016739.757 | 7269020.978 |
| Hooded Crane | -5020691.599 | 7272179.642 |
| Hooded Crane | -4812145.665 | 6737099.504 |
| Hooded Crane | -5016750.889 | 7268997.912 |
| Hooded Crane | -4813786.514 | 6733281.882 |
| Hooded Crane | -4812159.023 | 6737088.722 |
| Hooded Crane | -4810571.607 | 6737239.667 |
| Hooded Crane | -5016670.739 | 7269109.395 |



|              |              |             |
|--------------|--------------|-------------|
| Hooded Crane | -4812147.891 | 6737072.55  |
| Hooded Crane | -5019177.654 | 7274456.677 |
| Hooded Crane | -5015960.52  | 7268640.41  |
| Hooded Crane | -4812181.287 | 6737119.27  |
| Hooded Crane | -4812755.696 | 6735112.318 |
| Hooded Crane | -5014430.991 | 7290655.593 |
| Hooded Crane | -5017009.15  | 7272771.914 |
| Hooded Crane | -5016138.632 | 7272604.612 |
| Hooded Crane | -5020740.579 | 7274750.971 |
| Hooded Crane | -5100251.639 | 7214322.395 |
| Hooded Crane | -4811183.864 | 6736959.343 |
| Hooded Crane | -4812172.381 | 6737022.235 |
| Hooded Crane | -5016766.474 | 7270049.373 |
| Hooded Crane | -4810284.403 | 6737579.305 |
| Hooded Crane | -5016824.36  | 7270070.519 |
| Hooded Crane | -5016824.36  | 7270080.131 |
| Hooded Crane | -5019431.462 | 7270358.879 |
| Hooded Crane | -5107665.517 | 7211492.405 |
| Hooded Crane | -5017055.904 | 7272741.146 |
| Hooded Crane | -5015795.768 | 7273798.884 |
| Hooded Crane | -5019716.44  | 7270064.752 |
| Hooded Crane | -5106659.189 | 7212253.71  |
| Hooded Crane | -5020700.504 | 7269074.797 |
| Hooded Crane | -4810435.797 | 6737593.681 |
| Hooded Crane | -5074055.936 | 7240428.51  |
| Hooded Crane | -5014631.366 | 7280758.546 |
| Hooded Crane | -5023786.281 | 7269365.042 |
| Hooded Crane | -5018678.942 | 7272993.067 |
| Hooded Crane | -5015766.824 | 7273866.199 |
| Hooded Crane | -5015524.148 | 7273898.895 |
| Hooded Crane | -5021134.65  | 7268753.809 |
| Hooded Crane | -5017803.971 | 7270043.606 |
| Hooded Crane | -5015844.748 | 7272581.536 |
| Hooded Crane | -4814127.152 | 6734837.456 |
| Hooded Crane | -4871674.876 | 6903841.191 |
| Hooded Crane | -5073978.013 | 7223944.032 |
| Hooded Crane | -4812288.154 | 6736546.061 |
| Hooded Crane | -5099392.252 | 7212908.225 |
| Hooded Crane | -5018503.058 | 7269530.353 |
| Hooded Crane | -5023403.342 | 7269653.377 |
| Hooded Crane | -5014364.199 | 7283798.743 |
| Hooded Crane | -5103929.635 | 7214755.666 |
| Hooded Crane | -4812172.381 | 6735706.985 |
| Hooded Crane | -5017249.6   | 7268108.031 |
| Hooded Crane | -5016735.304 | 7266712.87  |
| Hooded Crane | -5101090.988 | 7214291.857 |
| Hooded Crane | -4809629.844 | 6737421.165 |
| Hooded Crane | -5097958.457 | 7217092.314 |
| Hooded Crane | -4812444.001 | 6736339.428 |
| Hooded Crane | -4810901.113 | 6737221.698 |
| Hooded Crane | -5071310.798 | 7218150.145 |
| Hooded Crane | -4809536.336 | 6737877.623 |
| Hooded Crane | -5015446.224 | 7274008.525 |
| Hooded Crane | -5015624.336 | 7273627.713 |
| Hooded Crane | -5014680.346 | 7280804.746 |
| Hooded Crane | -4810335.61  | 6737403.195 |
| Hooded Crane | -5017797.292 | 7270041.684 |
| Hooded Crane | -5019460.405 | 7275179.929 |

|              |              |             |
|--------------|--------------|-------------|
| Hooded Crane | -5016608.4   | 7272877.682 |
| Hooded Crane | -5019186.559 | 7270389.638 |
| Hooded Crane | -5018053.327 | 7272039.272 |
| Hooded Crane | -5015833.616 | 7273668.101 |
| Hooded Crane | -5015608.751 | 7273885.432 |
| Hooded Crane | -5017679.293 | 7270074.364 |
| Hooded Crane | -5019119.768 | 7273925.822 |
| Hooded Crane | -5016684.097 | 7269318.91  |
| Hooded Crane | -5018304.909 | 7269559.186 |
| Hooded Crane | -5017799.518 | 7270047.451 |
| Hooded Crane | -5093436.66  | 7223212.156 |
| Hooded Crane | -4866474.029 | 6905206.397 |
| Hooded Crane | -4812421.737 | 6736350.209 |
| Hooded Crane | -5014315.218 | 7283423.226 |
| Hooded Crane | -5021911.66  | 7272414.238 |
| Hooded Crane | -4813051.805 | 6735468.035 |
| Hooded Crane | -5020239.642 | 7275024.116 |
| Hooded Crane | -4812090.005 | 6737103.098 |
| Hooded Crane | -5018534.227 | 7271835.452 |
| Hooded Crane | -4813953.493 | 6734736.856 |
| Hooded Crane | -4812165.702 | 6737092.316 |
| Hooded Crane | -5019226.634 | 7273858.506 |
| Hooded Crane | -4812143.438 | 6737040.205 |
| Hooded Crane | -5019228.861 | 7274554.774 |
| Hooded Crane | -5015993.916 | 7272621.919 |
| Hooded Crane | -4812092.231 | 6735924.382 |
| Hooded Crane | -4812156.797 | 6737067.159 |
| Hooded Crane | -4814089.303 | 6735281.192 |
| Hooded Crane | -5018667.81  | 7273035.375 |
| Hooded Crane | -4812633.244 | 6735335.088 |
| Hooded Crane | -4812887.053 | 6735139.266 |
| Hooded Crane | -5015829.163 | 7273670.024 |
| Hooded Crane | -5016508.212 | 7269332.365 |
| Hooded Crane | -4814360.923 | 6734776.377 |
| Hooded Crane | -5100979.668 | 7212826.17  |
| Hooded Crane | -5100302.846 | 7214320.486 |
| Hooded Crane | -5015853.654 | 7272575.767 |
| Hooded Crane | -4810415.76  | 6737586.493 |
| Hooded Crane | -5019206.597 | 7270601.11  |
| Hooded Crane | -4812143.438 | 6737068.956 |
| Hooded Crane | -5018356.116 | 7269436.164 |
| Hooded Crane | -5023394.436 | 7269651.454 |
| Hooded Crane | -5014375.331 | 7283798.743 |
| Hooded Crane | -5018507.51  | 7269566.875 |
| Hooded Crane | -5017881.895 | 7272762.299 |
| Hooded Crane | -4814082.624 | 6734837.456 |
| Hooded Crane | -5101006.385 | 7212906.317 |
| Hooded Crane | -4810230.969 | 6736298.102 |
| Hooded Crane | -4812147.891 | 6737108.489 |
| Hooded Crane | -5016819.907 | 7270070.519 |
| Hooded Crane | -5015691.127 | 7272406.546 |
| Hooded Crane | -5090299.676 | 7230673.637 |
| Hooded Crane | -5019297.879 | 7273043.067 |
| Hooded Crane | -4811998.723 | 6735396.172 |
| Hooded Crane | -5016815.454 | 7270066.674 |
| Hooded Crane | -5016808.775 | 7270033.994 |
| Hooded Crane | -5094594.382 | 7222560.596 |
| Hooded Crane | -4811259.562 | 6735671.052 |

|              |              |             |
|--------------|--------------|-------------|
| Hooded Crane | -4814265.188 | 6735539.899 |
| Hooded Crane | -5017657.029 | 7270022.46  |
| Hooded Crane | -4810892.207 | 6736659.262 |
| Hooded Crane | -4812481.85  | 6736012.42  |
| Hooded Crane | -5018151.288 | 7273673.871 |
| Hooded Crane | -5020829.635 | 7274752.894 |
| Hooded Crane | -4812633.244 | 6735114.114 |
| Hooded Crane | -5101095.441 | 7214318.577 |
| Hooded Crane | -5023799.639 | 7269347.743 |
| Hooded Crane | -5018376.153 | 7272170.028 |
| Hooded Crane | -5017808.424 | 7270055.14  |
| Hooded Crane | -5017824.009 | 7270041.684 |
| Hooded Crane | -5017913.064 | 7270295.439 |
| Hooded Crane | -5019084.145 | 7273204.61  |
| Hooded Crane | -4812154.57  | 6737056.377 |
| Hooded Crane | -4814238.471 | 6734548.233 |
| Hooded Crane | -5014368.652 | 7283791.04  |
| Hooded Crane | -4812132.306 | 6737085.128 |
| Hooded Crane | -4812272.569 | 6736714.965 |
| Hooded Crane | -4810168.631 | 6737493.046 |
| Hooded Crane | -4812145.665 | 6737095.91  |
| Hooded Crane | -4812056.609 | 6735723.155 |
| Hooded Crane | -5016419.157 | 7268655.786 |
| Hooded Crane | -4809796.823 | 6738132.819 |
| Hooded Crane | -5019950.211 | 7272270.018 |
| Hooded Crane | -5022074.187 | 7270116.656 |
| Hooded Crane | -4812172.381 | 6737090.519 |
| Hooded Crane | -5020974.35  | 7273616.173 |
| Hooded Crane | -5102624.97  | 7215828.452 |
| Hooded Crane | -5100972.989 | 7212816.628 |
| Hooded Crane | -4812145.665 | 6737058.174 |
| Hooded Crane | -5018507.51  | 7269568.798 |
| Hooded Crane | -4812590.943 | 6735432.103 |
| Hooded Crane | -5018233.664 | 7270074.364 |
| Hooded Crane | -5016641.796 | 7269111.317 |
| Hooded Crane | -5018405.096 | 7275780.126 |
| Hooded Crane | -5019297.879 | 7273048.837 |
| Hooded Crane | -5019378.029 | 7270358.879 |
| Hooded Crane | -4856637.839 | 6956342.695 |
| Hooded Crane | -5015555.317 | 7268957.548 |
| Hooded Crane | -5074018.088 | 7240394.039 |
| Hooded Crane | -4814276.32  | 6734548.233 |
| Hooded Crane | -4814245.15  | 6734539.251 |
| Hooded Crane | -5084259.481 | 7231888.263 |
| Hooded Crane | -4812159.023 | 6737079.737 |
| Hooded Crane | -5016655.154 | 7270295.439 |
| Hooded Crane | -5019302.332 | 7270337.733 |
| Hooded Crane | -5018193.589 | 7272014.275 |
| Hooded Crane | -4814269.641 | 6734717.095 |
| Hooded Crane | -4849333.054 | 6937430.13  |
| Hooded Crane | -4812143.438 | 6737086.925 |
| Hooded Crane | -5018485.246 | 7269455.386 |
| Hooded Crane | -5017830.688 | 7272977.682 |
| Hooded Crane | -4812216.909 | 6737104.895 |
| Hooded Crane | -4813330.104 | 6735112.318 |
| Hooded Crane | -5018251.476 | 7270816.433 |
| Hooded Crane | -5018231.438 | 7267281.666 |
| Hooded Crane | -4812557.547 | 6735514.746 |

|              |              |             |
|--------------|--------------|-------------|
| Hooded Crane | -4812161.249 | 6737068.956 |
| Hooded Crane | -5101549.624 | 7213516.993 |
| Hooded Crane | -5100300.619 | 7214291.857 |
| Hooded Crane | -5019119.768 | 7271873.909 |
| Hooded Crane | -4812826.94  | 6736855.122 |
| Hooded Crane | -5019375.802 | 7273081.529 |
| Hooded Crane | -5017737.179 | 7268701.915 |
| Hooded Crane | -5016425.836 | 7275256.875 |
| Hooded Crane | -5019707.534 | 7270070.519 |
| Hooded Crane | -5020802.918 | 7269036.355 |
| Hooded Crane | -4813463.687 | 6734576.976 |
| Hooded Crane | -4812533.057 | 6735848.921 |
| Hooded Crane | -4812121.174 | 6737079.737 |
| Hooded Crane | -5018434.039 | 7273464.238 |
| Hooded Crane | -4871672.649 | 6903835.687 |
| Hooded Crane | -5100405.26  | 7212211.732 |
| Hooded Crane | -5101013.064 | 7212780.371 |
| Hooded Crane | -5019291.2   | 7270455.002 |
| Hooded Crane | -4812154.57  | 6737059.971 |
| Hooded Crane | -4809574.184 | 6737719.477 |
| Hooded Crane | -5016706.361 | 7273385.387 |
| Hooded Crane | -5019716.44  | 7270068.597 |
| Hooded Crane | -5101102.12  | 7212847.16  |
| Hooded Crane | -5016085.198 | 7268436.679 |
| Hooded Crane | -5016045.123 | 7266434.253 |
| Hooded Crane | -4812141.212 | 6737009.657 |
| Hooded Crane | -5019794.364 | 7268425.147 |
| Hooded Crane | -4809894.785 | 6737372.645 |
| Hooded Crane | -5101124.384 | 7214589.608 |
| Hooded Crane | -4812170.155 | 6735879.464 |
| Hooded Crane | -4810910.018 | 6736463.407 |
| Hooded Crane | -5015751.24  | 7273718.106 |
| Hooded Crane | -4812757.922 | 6736896.451 |
| Hooded Crane | -5016724.172 | 7270091.665 |
| Hooded Crane | -4855486.795 | 6956139.531 |
| Hooded Crane | -4812174.608 | 6737094.113 |
| Hooded Crane | -5019865.608 | 7270035.917 |
| Hooded Crane | -5015461.809 | 7273995.062 |
| Hooded Crane | -5103290.661 | 7215206.142 |
| Hooded Crane | -5075093.434 | 7240384.464 |
| Hooded Crane | -5011627.966 | 7273152.685 |
| Hooded Crane | -4810943.414 | 6736984.5   |
| Hooded Crane | -4811858.46  | 6735730.341 |
| Hooded Crane | -4814180.585 | 6734887.757 |
| Hooded Crane | -4812141.212 | 6737050.986 |
| Hooded Crane | -5023804.092 | 7269347.743 |
| Hooded Crane | -5019126.447 | 7270643.405 |
| Hooded Crane | -4962863.35  | 7249334.744 |
| Hooded Crane | -4809870.294 | 6737505.626 |
| Hooded Crane | -5016579.457 | 7269180.514 |
| Hooded Crane | -5016312.29  | 7272606.535 |
| Hooded Crane | -5016837.718 | 7269774.48  |
| Hooded Crane | -4813085.201 | 6735349.461 |
| Hooded Crane | -5093423.301 | 7223259.927 |
| Hooded Crane | -4812152.344 | 6737018.641 |
| Hooded Crane | -5014916.344 | 7280968.376 |
| Hooded Crane | -5100440.882 | 7208131.339 |
| Hooded Crane | -4810297.761 | 6736546.061 |

|              |              |             |
|--------------|--------------|-------------|
| Hooded Crane | -5020635.939 | 7269007.523 |
| Hooded Crane | -5099828.625 | 7211782.417 |
| Hooded Crane | -5018743.508 | 7272837.298 |
| Hooded Crane | -4812150.117 | 6737079.737 |
| Hooded Crane | -4812176.834 | 6737097.707 |
| Hooded Crane | -5021335.025 | 7273560.399 |
| Hooded Crane | -5019462.632 | 7270422.32  |
| Hooded Crane | -5100273.903 | 7214303.308 |
| Hooded Crane | -5019671.912 | 7270124.345 |
| Hooded Crane | -4814256.282 | 6734562.604 |
| Hooded Crane | -5015105.587 | 7269786.014 |
| Hooded Crane | -5023396.662 | 7269670.677 |
| Hooded Crane | -5019273.388 | 7273069.991 |
| Hooded Crane | -5097101.297 | 7217812.159 |
| Hooded Crane | -4812450.68  | 6736316.07  |
| Hooded Crane | -5018117.892 | 7271422.061 |
| Hooded Crane | -4811967.554 | 6737027.626 |
| Hooded Crane | -5017038.093 | 7269845.605 |
| Hooded Crane | -5018652.226 | 7274448.983 |
| Hooded Crane | -4812150.117 | 6737079.737 |
| Hooded Crane | -4812145.665 | 6737079.737 |
| Hooded Crane | -5019578.404 | 7270237.767 |
| Hooded Crane | -5019489.348 | 7275187.624 |
| Hooded Crane | -5015617.656 | 7273912.359 |
| Hooded Crane | -4813312.293 | 6735121.3   |
| Hooded Crane | -4814178.359 | 6734866.2   |
| Hooded Crane | -4810081.801 | 6736826.371 |
| Hooded Crane | -5019854.476 | 7270032.072 |
| Hooded Crane | -5018202.495 | 7272008.507 |
| Hooded Crane | -4809876.973 | 6737061.768 |
| Hooded Crane | -4812138.986 | 6737079.737 |
| Hooded Crane | -5018788.035 | 7272833.452 |
| Hooded Crane | -5014666.988 | 7280795.121 |
| Hooded Crane | -4813492.631 | 6734830.271 |
| Hooded Crane | -5018447.398 | 7273468.085 |
| Hooded Crane | -4814303.036 | 6734589.55  |
| Hooded Crane | -4814251.829 | 6734523.084 |
| Hooded Crane | -5018480.794 | 7269459.23  |
| Hooded Crane | -4811337.485 | 6735726.748 |
| Hooded Crane | -5099953.303 | 7209285.231 |
| Hooded Crane | -4814365.375 | 6734760.21  |
| Hooded Crane | -4810854.359 | 6736705.98  |
| Hooded Crane | -4812154.57  | 6737077.94  |
| Hooded Crane | -4810052.858 | 6736871.294 |
| Hooded Crane | -5019433.689 | 7270353.112 |
| Hooded Crane | -5019398.066 | 7270368.492 |
| Hooded Crane | -5023383.304 | 7269662.988 |
| Hooded Crane | -5019433.689 | 7275104.908 |
| Hooded Crane | -5015568.676 | 7273921.975 |
| Hooded Crane | -4814242.924 | 6734523.084 |
| Hooded Crane | -4812706.715 | 6737011.454 |
| Hooded Crane | -5018220.306 | 7269491.908 |
| Hooded Crane | -5018474.114 | 7269468.842 |
| Hooded Crane | -4812143.438 | 6737061.768 |
| Hooded Crane | -5099051.615 | 7213104.781 |
| Hooded Crane | -5104252.461 | 7215061.071 |
| Hooded Crane | -5019286.747 | 7270305.051 |
| Hooded Crane | -4812167.929 | 6737067.159 |

|              |              |             |
|--------------|--------------|-------------|
| Hooded Crane | -5019233.313 | 7274214.326 |
| Hooded Crane | -5018338.305 | 7273621.943 |
| Hooded Crane | -4814249.603 | 6734546.437 |
| Hooded Crane | -4809881.426 | 6737273.81  |
| Hooded Crane | -5103682.506 | 7215440.934 |
| Hooded Crane | -4812176.834 | 6737099.504 |
| Hooded Crane | -5019685.271 | 7270120.501 |
| Hooded Crane | -4810642.852 | 6737241.464 |
| Hooded Crane | -5020103.832 | 7274725.965 |
| Hooded Crane | -5017819.556 | 7270049.373 |
| Hooded Crane | -4855615.926 | 6955781.236 |
| Hooded Crane | -5018198.042 | 7269265.089 |
| Hooded Crane | -5019061.881 | 7273246.919 |
| Hooded Crane | -4810662.889 | 6737228.886 |
| Hooded Crane | -4810063.99  | 6736725.746 |
| Hooded Crane | -5093358.736 | 7221301.577 |
| Hooded Crane | -5019340.18  | 7270539.591 |
| Hooded Crane | -5016436.968 | 7272139.261 |
| Hooded Crane | -4812159.023 | 6737074.346 |
| Hooded Crane | -5018489.699 | 7269588.02  |
| Hooded Crane | -4813183.162 | 6735220.109 |
| Hooded Crane | -4811851.781 | 6735494.984 |
| Hooded Crane | -5020415.526 | 7272043.118 |
| Hooded Crane | -4814276.32  | 6734664.999 |
| Hooded Crane | -5018209.174 | 7268011.937 |
| Hooded Crane | -4871672.649 | 6903833.852 |
| Hooded Crane | -5018496.378 | 7269541.886 |
| Hooded Crane | -5019306.784 | 7273035.375 |
| Hooded Crane | -5019246.672 | 7273183.455 |
| Hooded Crane | -5019440.368 | 7270112.811 |
| Hooded Crane | -4811021.338 | 6736693.402 |
| Hooded Crane | -5018485.246 | 7269457.308 |
| Hooded Crane | -5019255.577 | 7273025.759 |
| Hooded Crane | -5019858.929 | 7270018.615 |
| Hooded Crane | -5019444.82  | 7270358.879 |
| Hooded Crane | -5016307.837 | 7272418.084 |
| Hooded Crane | -4810771.982 | 6737200.134 |
| Hooded Crane | -5103609.035 | 7215395.121 |
| Hooded Crane | -5016505.986 | 7272048.887 |
| Hooded Crane | -5075040.001 | 7240378.718 |
| Hooded Crane | -4811255.109 | 6737043.798 |
| Hooded Crane | -4810215.385 | 6736871.294 |
| Hooded Crane | -4812528.604 | 6735484.204 |
| Hooded Crane | -4812666.64  | 6734961.412 |
| Hooded Crane | -4812161.249 | 6737056.377 |
| Hooded Crane | -5015829.163 | 7273668.101 |
| Hooded Crane | -4812130.08  | 6736898.247 |
| Hooded Crane | -4810676.247 | 6737266.622 |
| Hooded Crane | -4814249.603 | 6734668.592 |
| Hooded Crane | -5100409.712 | 7214207.877 |
| Hooded Crane | -5100322.883 | 7214345.298 |
| Hooded Crane | -5018594.34  | 7269276.622 |
| Hooded Crane | -5023383.304 | 7269655.299 |
| Hooded Crane | -5019288.973 | 7270595.343 |
| Hooded Crane | -5099797.455 | 7209344.36  |
| Hooded Crane | -5018503.058 | 7269553.42  |
| Hooded Crane | -5018324.946 | 7273539.244 |
| Hooded Crane | -4809567.505 | 6737591.884 |

|              |              |             |
|--------------|--------------|-------------|
| Hooded Crane | -5018803.62  | 7274050.839 |
| Hooded Crane | -5019711.987 | 7270072.441 |
| Hooded Crane | -5019718.666 | 7270053.218 |
| Hooded Crane | -5018467.435 | 7270572.273 |
| Hooded Crane | -5075044.453 | 7240361.483 |
| Hooded Crane | -5099639.382 | 7210656.772 |
| Hooded Crane | -4812152.344 | 6737061.768 |
| Hooded Crane | -4812595.395 | 6736511.921 |
| Hooded Crane | -4812170.155 | 6737103.098 |
| Hooded Crane | -5017821.782 | 7270049.373 |
| Hooded Crane | -4810333.383 | 6737626.029 |
| Hooded Crane | -4814245.15  | 6734519.491 |
| Hooded Crane | -4811958.648 | 6735480.611 |
| Hooded Crane | -4812141.212 | 6737040.205 |
| Hooded Crane | -4812517.472 | 6735935.162 |
| Hooded Crane | -5020413.3   | 7272050.809 |
| Hooded Crane | -5019300.105 | 7274383.586 |
| Hooded Crane | -4814236.245 | 6734747.634 |
| Hooded Crane | -4812147.891 | 6737063.565 |
| Hooded Crane | -5023423.379 | 7269680.288 |
| Hooded Crane | -4812141.212 | 6737115.676 |
| Hooded Crane | -5095663.049 | 7225683.23  |
| Hooded Crane | -4812136.759 | 6737079.737 |
| Hooded Crane | -5017899.706 | 7275776.278 |
| Hooded Crane | -5016559.419 | 7269195.891 |
| Hooded Crane | -4810230.969 | 6737579.305 |
| Hooded Crane | -5017033.64  | 7272748.838 |
| Hooded Crane | -5020350.961 | 7274850.995 |
| Hooded Crane | -5016051.802 | 7268473.197 |
| Hooded Crane | -5099801.908 | 7211915.979 |
| Hooded Crane | -4849473.316 | 6937638.343 |
| Hooded Crane | -5019324.595 | 7274337.424 |
| Hooded Crane | -5016539.382 | 7272033.504 |
| Hooded Crane | -5021319.441 | 7272245.02  |
| Hooded Crane | -4810642.852 | 6737263.028 |
| Hooded Crane | -5014399.821 | 7283787.188 |
| Hooded Crane | -4812143.438 | 6737090.519 |
| Hooded Crane | -5019195.465 | 7273110.376 |
| Hooded Crane | -5023392.21  | 7269647.61  |
| Hooded Crane | -4963822.924 | 7250326.022 |
| Hooded Crane | -4811998.723 | 6735415.934 |
| Hooded Crane | -5016554.966 | 7271956.59  |
| Hooded Crane | -4810756.397 | 6736961.14  |
| Hooded Crane | -5017799.518 | 7270035.917 |
| Hooded Crane | -5021562.117 | 7271039.452 |
| Hooded Crane | -5100349.6   | 7214299.491 |
| Hooded Crane | -5020785.107 | 7273681.564 |
| Hooded Crane | -5014680.346 | 7280804.746 |
| Hooded Crane | -5019286.747 | 7273114.222 |
| Hooded Crane | -5101859.092 | 7212969.291 |
| Hooded Crane | -5021357.289 | 7270997.155 |
| Hooded Crane | -4813111.918 | 6735229.092 |
| Hooded Crane | -4812791.318 | 6736826.371 |
| Hooded Crane | -5019838.891 | 7272966.144 |
| Hooded Crane | -5017810.65  | 7270047.451 |
| Hooded Crane | -5102092.863 | 7215311.13  |
| Hooded Crane | -5019981.38  | 7275002.957 |
| Hooded Crane | -5102326.634 | 7215261.499 |

|              |              |             |
|--------------|--------------|-------------|
| Hooded Crane | -5100307.299 | 7207902.488 |
| Hooded Crane | -5015829.163 | 7273677.717 |
| Hooded Crane | -4812472.944 | 6736289.118 |
| Hooded Crane | -4812179.061 | 6735326.105 |
| Hooded Crane | -5102575.99  | 7212549.476 |
| Hooded Crane | -5100993.027 | 7212805.179 |
| Hooded Crane | -5019226.634 | 7272771.914 |
| Hooded Crane | -5019852.25  | 7270020.538 |
| Hooded Crane | -5019424.783 | 7269937.877 |
| Hooded Crane | -4810682.927 | 6737223.495 |
| Hooded Crane | -5019402.519 | 7275158.769 |
| Hooded Crane | -4809852.483 | 6736979.109 |
| Hooded Crane | -5022432.636 | 7272712.301 |
| Hooded Crane | -4812804.676 | 6735311.733 |
| Hooded Crane | -4871668.196 | 6903826.513 |
| Hooded Crane | -5019090.824 | 7274212.402 |
| Hooded Crane | -4812165.702 | 6737083.331 |
| Hooded Crane | -5019251.125 | 7270410.785 |
| Hooded Crane | -4812125.627 | 6735723.155 |
| Hooded Crane | -4810716.322 | 6736003.436 |
| Hooded Crane | -5016726.398 | 7266685.969 |
| Hooded Crane | -5016539.382 | 7271798.919 |
| Hooded Crane | -4814276.32  | 6735638.713 |
| Hooded Crane | -5022163.242 | 7271877.754 |
| Hooded Crane | -5016336.78  | 7273750.802 |
| Hooded Crane | -4871917.552 | 6901474.657 |
| Hooded Crane | -5017857.405 | 7270764.524 |
| Hooded Crane | -5015457.356 | 7273998.908 |
| Hooded Crane | -4809556.373 | 6737724.868 |
| Hooded Crane | -5019050.749 | 7273233.457 |
| Hooded Crane | -4810366.779 | 6736213.654 |
| Hooded Crane | -4856150.259 | 6956640.063 |
| Hooded Crane | -5018240.344 | 7269495.753 |
| Hooded Crane | -5015818.031 | 7273818.117 |
| Hooded Crane | -5017185.035 | 7268150.312 |
| Hooded Crane | -5097159.183 | 7217873.262 |
| Hooded Crane | -4812150.117 | 6737047.392 |
| Hooded Crane | -5020789.56  | 7269119.006 |
| Hooded Crane | -4810633.946 | 6737228.886 |
| Hooded Crane | -4812479.623 | 6736779.652 |
| Hooded Crane | -5019211.05  | 7270591.498 |
| Hooded Crane | -5017338.656 | 7267990.797 |
| Hooded Crane | -5019683.044 | 7270158.948 |
| Hooded Crane | -4814067.039 | 6735062.016 |
| Hooded Crane | -4814167.227 | 6734763.802 |
| Hooded Crane | -5018155.741 | 7275595.445 |
| Hooded Crane | -5019921.268 | 7274570.162 |
| Hooded Crane | -5019246.672 | 7270543.436 |
| Hooded Crane | -5074527.931 | 7240309.778 |
| Hooded Crane | -4812539.736 | 6736114.833 |
| Hooded Crane | -5014675.893 | 7280814.372 |
| Hooded Crane | -4812049.93  | 6735315.326 |
| Hooded Crane | -5015746.787 | 7268863.367 |
| Hooded Crane | -5020535.751 | 7270526.133 |
| Hooded Crane | -4809872.521 | 6736975.515 |
| Hooded Crane | -4812141.212 | 6737077.94  |
| Hooded Crane | -5019542.782 | 7275160.693 |
| Hooded Crane | -5019805.496 | 7273033.452 |



|              |              |             |
|--------------|--------------|-------------|
| Hooded Crane | -4810159.725 | 6736833.559 |
| Hooded Crane | -4812152.344 | 6737081.534 |
| Hooded Crane | -4813995.795 | 6734729.67  |
| Hooded Crane | -4812143.438 | 6737074.346 |
| Hooded Crane | -4814249.603 | 6734569.79  |
| Hooded Crane | -5023064.93  | 7269799.47  |
| Hooded Crane | -5021054.5   | 7270224.31  |
| Hooded Crane | -5020477.865 | 7274652.872 |
| Hooded Crane | -4812170.155 | 6737076.143 |
| Hooded Crane | -4812150.117 | 6737058.174 |
| Hooded Crane | -5095709.804 | 7225096.446 |
| Hooded Crane | -5018409.549 | 7271583.569 |
| Hooded Crane | -4814271.867 | 6734812.306 |
| Hooded Crane | -5018487.473 | 7269468.842 |
| Hooded Crane | -5102671.725 | 7212560.925 |
| Hooded Crane | -4812150.117 | 6737077.94  |
| Hooded Crane | -5016089.651 | 7268594.282 |
| Hooded Crane | -4812521.925 | 6736008.827 |
| Hooded Crane | -4812152.344 | 6737068.956 |
| Hooded Crane | -5102665.045 | 7215843.724 |
| Hooded Crane | -4813229.917 | 6734370.393 |
| Hooded Crane | -4814225.113 | 6734501.527 |
| Hooded Crane | -5018173.552 | 7271927.748 |
| Hooded Crane | -4849186.112 | 6937444.871 |
| Hooded Crane | -5015602.072 | 7273891.202 |
| Hooded Crane | -4814614.731 | 6734747.634 |
| Hooded Crane | -4812686.677 | 6736901.841 |
| Hooded Crane | -4814165     | 6735051.237 |
| Hooded Crane | -4812735.658 | 6735457.255 |
| Hooded Crane | -4814282.999 | 6735626.136 |
| Hooded Crane | -5023389.983 | 7269726.423 |
| Hooded Crane | -5018627.735 | 7269370.809 |
| Hooded Crane | -5093485.64  | 7223279.035 |
| Hooded Crane | -5021893.849 | 7271985.433 |
| Hooded Crane | -5014678.12  | 7280822.072 |
| Hooded Crane | -4812163.476 | 6737090.519 |
| Hooded Crane | -5023374.398 | 7269724.501 |
| Hooded Crane | -5019865.608 | 7275066.436 |
| Hooded Crane | -4813396.896 | 6734479.971 |
| Hooded Crane | -4810691.832 | 6737464.294 |
| Hooded Crane | -5018507.51  | 7269564.953 |
| Hooded Crane | -5019805.496 | 7272929.605 |
| Hooded Crane | -5104564.156 | 7213030.357 |
| Hooded Crane | -5016452.553 | 7267325.864 |
| Hooded Crane | -4812145.665 | 6737052.783 |
| Hooded Crane | -5100307.299 | 7214318.577 |
| Hooded Crane | -4811994.27  | 6735013.51  |
| Hooded Crane | -5018483.02  | 7269451.542 |
| Hooded Crane | -5018705.659 | 7268846.068 |
| Hooded Crane | -5019438.141 | 7275037.582 |
| Hooded Crane | -5018414.002 | 7275662.776 |
| Hooded Crane | -4813040.673 | 6734911.111 |
| Hooded Crane | -5020495.676 | 7270574.195 |
| Hooded Crane | -5075193.621 | 7240106.788 |
| Hooded Crane | -4812147.891 | 6737077.94  |
| Hooded Crane | -5023000.365 | 7269991.702 |
| Hooded Crane | -4812150.117 | 6737070.753 |
| Hooded Crane | -4810391.27  | 6737541.567 |

|              |              |             |
|--------------|--------------|-------------|
| Hooded Crane | -5018505.284 | 7269574.564 |
| Hooded Crane | -4811989.817 | 6735394.375 |
| Hooded Crane | -5017280.77  | 7269809.082 |
| Hooded Crane | -4810665.115 | 6737245.058 |
| Hooded Crane | -4814189.491 | 6734815.899 |
| Hooded Crane | -4814220.66  | 6734530.269 |
| Hooded Crane | -5097199.258 | 7217932.457 |
| Hooded Crane | -4855595.888 | 6955860.65  |
| Hooded Crane | -4811947.516 | 6735453.662 |
| Hooded Crane | -5018647.773 | 7273810.423 |
| Hooded Crane | -4813022.862 | 6734947.041 |
| Hooded Crane | -5016412.478 | 7271943.13  |
| Hooded Crane | -4812127.854 | 6737068.956 |
| Hooded Crane | -4812127.854 | 6737085.128 |
| Hooded Crane | -4810173.083 | 6736224.435 |
| Hooded Crane | -5017035.867 | 7272748.838 |
| Hooded Crane | -5018645.547 | 7269353.509 |
| Hooded Crane | -5017817.329 | 7270033.994 |
| Hooded Crane | -4810914.471 | 6736682.621 |
| Hooded Crane | -5019309.011 | 7273108.453 |
| Hooded Crane | -4811250.656 | 6735879.464 |
| Hooded Crane | -4812152.344 | 6737072.55  |
| Hooded Crane | -4963346.476 | 7249401.848 |
| Hooded Crane | -5017766.123 | 7273481.547 |
| Hooded Crane | -5019211.05  | 7274348.964 |
| Hooded Crane | -5103991.974 | 7214990.445 |
| Hooded Crane | -4810642.852 | 6737257.637 |
| Hooded Crane | -4810760.85  | 6737502.032 |
| Hooded Crane | -4809863.615 | 6737401.398 |
| Hooded Crane | -4811028.017 | 6736817.387 |
| Hooded Crane | -4812181.287 | 6737079.737 |
| Hooded Crane | -5018491.926 | 7269589.942 |
| Hooded Crane | -5016871.114 | 7270889.491 |
| Hooded Crane | -4814280.773 | 6734724.281 |
| Hooded Crane | -4964628.877 | 7252460.477 |
| Hooded Crane | -5019841.118 | 7275035.658 |
| Hooded Crane | -5014640.271 | 7280556.422 |
| Hooded Crane | -5014361.973 | 7283823.778 |
| Hooded Crane | -5104708.871 | 7215458.114 |
| Hooded Crane | -4812410.605 | 6735451.866 |
| Hooded Crane | -5100329.562 | 7214186.883 |
| Hooded Crane | -4812138.986 | 6735694.408 |
| Hooded Crane | -4812294.833 | 6736903.638 |
| Hooded Crane | -5018514.19  | 7269570.72  |
| Hooded Crane | -4812145.665 | 6737050.986 |
| Hooded Crane | -4963335.344 | 7249328.993 |
| Hooded Crane | -4810199.8   | 6737027.626 |
| Hooded Crane | -4814318.621 | 6734767.395 |
| Hooded Crane | -4812417.284 | 6735500.374 |
| Hooded Crane | -4812154.57  | 6737074.346 |
| Hooded Crane | -5018229.212 | 7269516.897 |
| Hooded Crane | -5020640.392 | 7274895.237 |
| Hooded Crane | -4813312.293 | 6735119.504 |
| Hooded Crane | -5100739.218 | 7214251.775 |
| Hooded Crane | -5016806.549 | 7273550.783 |
| Hooded Crane | -4812751.243 | 6735017.103 |
| Hooded Crane | -5020722.768 | 7273208.456 |
| Hooded Crane | -4810823.189 | 6737207.322 |

|              |              |             |
|--------------|--------------|-------------|
| Hooded Crane | -4809565.279 | 6737636.811 |
| Hooded Crane | -4813292.255 | 6735121.3   |
| Hooded Crane | -4812076.647 | 6735356.647 |
| Hooded Crane | -4810133.008 | 6736912.623 |
| Hooded Crane | -5018509.737 | 7269534.197 |
| Hooded Crane | -4963252.968 | 7249353.917 |
| Hooded Crane | -4963339.797 | 7249357.751 |
| Hooded Crane | -4812392.794 | 6736175.922 |
| Hooded Crane | -4810709.643 | 6737297.171 |
| Hooded Crane | -4814100.435 | 6734833.864 |
| Hooded Crane | -5103413.112 | 7214347.207 |
| Hooded Crane | -5100670.2   | 7213549.436 |
| Hooded Crane | -4810674.021 | 6737081.534 |
| Hooded Crane | -5093476.735 | 7223129.992 |
| Hooded Crane | -4813312.293 | 6735112.318 |
| Hooded Crane | -4814209.528 | 6734503.324 |
| Hooded Crane | -5099118.406 | 7210208.467 |
| Hooded Crane | -5018489.699 | 7269470.764 |
| Hooded Crane | -4812130.08  | 6737092.316 |
| Hooded Crane | -5019186.559 | 7274270.104 |
| Hooded Crane | -4813303.387 | 6735103.335 |
| Hooded Crane | -4813314.519 | 6734476.378 |
| Hooded Crane | -4813385.764 | 6734824.881 |
| Hooded Crane | -4810852.132 | 6737225.292 |
| Hooded Crane | -5097132.467 | 7217863.715 |
| Hooded Crane | -5019233.313 | 7274398.974 |
| Hooded Crane | -5021987.358 | 7273227.687 |
| Hooded Crane | -4810930.056 | 6737056.377 |
| Hooded Crane | -4812152.344 | 6737068.956 |
| Hooded Crane | -4812145.665 | 6737097.707 |
| Hooded Crane | -5018307.135 | 7272216.177 |
| Hooded Crane | -5020328.697 | 7271939.285 |
| Hooded Crane | -4814231.792 | 6734747.634 |
| Hooded Crane | -4814227.339 | 6734539.251 |
| Hooded Crane | -4814169.453 | 6734830.271 |
| Hooded Crane | -5106449.908 | 7225488.268 |
| Hooded Crane | -4813459.235 | 6734602.125 |
| Hooded Crane | -5106928.582 | 7225018.085 |
| Hooded Crane | -4812147.891 | 6737067.159 |
| Hooded Crane | -5103019.041 | 7211589.711 |
| Hooded Crane | -5104570.835 | 7213026.54  |
| Hooded Crane | -5016632.89  | 7269355.432 |
| Hooded Crane | -5100716.954 | 7213910.141 |
| Hooded Crane | -4811958.648 | 6735487.797 |
| Hooded Crane | -5099786.323 | 7210803.669 |
| Hooded Crane | -4812161.249 | 6737068.956 |
| Hooded Crane | -5020448.922 | 7274674.03  |
| Hooded Crane | -5093625.903 | 7223410.883 |
| Hooded Crane | -4814262.961 | 6734715.299 |
| Hooded Crane | -4813595.044 | 6734616.496 |
| Hooded Crane | -5093389.905 | 7222908.343 |
| Hooded Crane | -5016049.576 | 7273246.919 |
| Hooded Crane | -5018572.076 | 7276068.698 |
| Hooded Crane | -5018997.316 | 7273952.748 |
| Hooded Crane | -4810313.346 | 6737527.19  |
| Hooded Crane | -5019705.308 | 7270066.674 |
| Hooded Crane | -5098995.955 | 7212894.867 |
| Hooded Crane | -4812824.714 | 6736862.309 |

|              |              |             |
|--------------|--------------|-------------|
| Hooded Crane | -5017806.198 | 7270053.218 |
| Hooded Crane | -4809897.011 | 6737489.452 |
| Hooded Crane | -5023000.365 | 7270003.236 |
| Hooded Crane | -5023799.639 | 7269359.276 |
| Hooded Crane | -4812826.94  | 6735088.963 |
| Hooded Crane | -4813572.781 | 6734623.682 |
| Hooded Crane | -5095696.445 | 7225211.124 |
| Hooded Crane | -4812731.205 | 6735094.353 |
| Hooded Crane | -4810889.981 | 6737148.022 |
| Hooded Crane | -5018044.421 | 7272041.195 |
| Hooded Crane | -4812688.904 | 6735024.289 |
| Hooded Crane | -5020170.624 | 7273370.002 |
| Hooded Crane | -5014673.667 | 7280814.372 |
| Hooded Crane | -5101166.685 | 7214505.626 |
| Hooded Crane | -5023799.639 | 7269353.509 |
| Hooded Crane | -4812539.736 | 6735989.063 |
| Hooded Crane | -4812143.438 | 6737063.565 |
| Hooded Crane | -4812352.719 | 6735647.696 |
| Hooded Crane | -5020411.074 | 7272083.498 |
| Hooded Crane | -4812604.301 | 6735182.382 |
| Hooded Crane | -4811348.617 | 6735715.968 |
| Hooded Crane | -5019211.05  | 7274414.361 |
| Hooded Crane | -4812141.212 | 6737065.362 |
| Hooded Crane | -4814018.059 | 6734726.077 |
| Hooded Crane | -4810945.641 | 6736882.075 |
| Hooded Crane | -4812733.432 | 6735410.544 |
| Hooded Crane | -4812214.683 | 6737042.001 |
| Hooded Crane | -4811114.846 | 6737094.113 |
| Hooded Crane | -4812156.797 | 6735804.004 |
| Hooded Crane | -4812161.249 | 6737052.783 |
| Hooded Crane | -5014484.424 | 7283789.114 |
| Hooded Crane | -4812134.533 | 6737083.331 |
| Hooded Crane | -4812381.662 | 6736192.093 |
| Hooded Crane | -5019422.557 | 7275031.811 |
| Hooded Crane | -4812163.476 | 6737070.753 |
| Hooded Crane | -5020457.828 | 7274658.642 |
| Hooded Crane | -4812141.212 | 6737068.956 |
| Hooded Crane | -5018503.058 | 7269549.575 |
| Hooded Crane | -5015751.24  | 7273718.106 |
| Hooded Crane | -5101807.885 | 7212526.577 |
| Hooded Crane | -4810861.038 | 6737228.886 |
| Hooded Crane | -4810633.946 | 6737254.043 |
| Hooded Crane | -4813425.839 | 6734939.855 |
| Hooded Crane | -5095631.88  | 7225656.471 |
| Hooded Crane | -4849847.35  | 6937623.602 |
| Hooded Crane | -5075035.548 | 7240371.058 |
| Hooded Crane | -4812163.476 | 6737050.986 |
| Hooded Crane | -4812815.808 | 6735417.73  |
| Hooded Crane | -4812138.986 | 6737081.534 |
| Hooded Crane | -4812976.108 | 6735211.127 |
| Hooded Crane | -4812194.645 | 6736634.106 |
| Hooded Crane | -5106636.925 | 7212223.18  |
| Hooded Crane | -4814238.471 | 6734559.012 |
| Hooded Crane | -5101870.224 | 7212667.785 |
| Hooded Crane | -4818326.123 | 6742175.702 |
| Hooded Crane | -5093452.244 | 7222994.326 |
| Hooded Crane | -5021368.421 | 7270949.09  |
| Hooded Crane | -4812715.62  | 6735035.068 |

|              |              |             |
|--------------|--------------|-------------|
| Hooded Crane | -4871677.102 | 6903813.67  |
| Hooded Crane | -4812156.797 | 6737068.956 |
| Hooded Crane | -4812147.891 | 6737076.143 |
| Hooded Crane | -5020408.847 | 7272054.655 |
| Hooded Crane | -4810625.04  | 6737239.667 |
| Hooded Crane | -4812713.394 | 6735376.409 |
| Hooded Crane | -4812041.024 | 6735358.444 |
| Hooded Crane | -4814238.471 | 6734542.844 |
| Hooded Crane | -4812134.533 | 6737059.971 |
| Hooded Crane | -5014671.441 | 7280808.596 |
| Hooded Crane | -4962932.368 | 7248797.935 |
| Hooded Crane | -4857094.249 | 6958987.998 |
| Hooded Crane | -4812617.659 | 6734814.103 |
| Hooded Crane | -5015826.937 | 7273677.717 |
| Hooded Crane | -5019340.18  | 7275104.908 |
| Hooded Crane | -4814238.471 | 6734544.641 |
| Hooded Crane | -4813283.35  | 6735085.37  |
| Hooded Crane | -5015430.64  | 7274933.708 |
| Hooded Crane | -4857316.888 | 6956104.439 |
| Hooded Crane | -5017031.414 | 7272754.607 |
| Hooded Crane | -5017038.093 | 7272739.223 |
| Hooded Crane | -5104279.178 | 7214978.992 |
| Hooded Crane | -5018418.455 | 7273441.16  |
| Hooded Crane | -5101932.563 | 7213001.732 |
| Hooded Crane | -4812147.891 | 6737079.737 |
| Hooded Crane | -4810255.46  | 6736475.985 |
| Hooded Crane | -5019863.382 | 7272521.924 |
| Hooded Crane | -4809785.691 | 6737412.18  |
| Hooded Crane | -4849239.545 | 6937511.204 |
| Hooded Crane | -5023398.889 | 7269661.066 |
| Hooded Crane | -5019228.861 | 7273087.299 |
| Hooded Crane | -4810914.471 | 6736998.875 |
| Hooded Crane | -4814245.15  | 6734866.2   |
| Hooded Crane | -5103649.11  | 7213410.121 |
| Hooded Crane | -4812290.38  | 6736576.607 |
| Hooded Crane | -4812147.891 | 6737061.768 |
| Hooded Crane | -4813301.161 | 6735114.114 |
| Hooded Crane | -4813853.306 | 6734727.874 |
| Hooded Crane | -5023385.53  | 7269741.801 |
| Hooded Crane | -4810745.266 | 6737446.323 |
| Hooded Crane | -5017815.103 | 7270043.606 |
| Hooded Crane | -4813303.387 | 6735108.725 |
| Hooded Crane | -4812156.797 | 6737115.676 |
| Hooded Crane | -4812141.212 | 6737077.94  |
| Hooded Crane | -4812172.381 | 6737050.986 |
| Hooded Crane | -4812101.137 | 6735719.561 |
| Hooded Crane | -4810451.382 | 6737599.073 |
| Hooded Crane | -4809854.71  | 6736977.312 |
| Hooded Crane | -4814191.717 | 6734519.491 |
| Hooded Crane | -5044600.799 | 7287127.19  |
| Hooded Crane | -4810682.927 | 6737221.698 |
| Hooded Crane | -4856412.973 | 6956326.072 |
| Hooded Crane | -5023806.318 | 7269349.665 |
| Hooded Crane | -5022114.262 | 7274046.992 |
| Hooded Crane | -4812094.458 | 6735354.85  |
| Hooded Crane | -5020264.132 | 7270781.827 |
| Hooded Crane | -4812232.494 | 6736556.842 |
| Hooded Crane | -4812141.212 | 6737079.737 |

|              |              |             |
|--------------|--------------|-------------|
| Hooded Crane | -4812134.533 | 6737076.143 |
| Hooded Crane | -5101360.381 | 7215101.156 |
| Hooded Crane | -5019206.597 | 7270595.343 |
| Hooded Crane | -4813312.293 | 6735133.876 |
| Hooded Crane | -4809868.068 | 6736964.733 |
| Hooded Crane | -4812163.476 | 6737059.971 |
| Hooded Crane | -5019211.05  | 7274470.141 |
| Hooded Crane | -5101035.328 | 7212772.738 |
| Hooded Crane | -4811916.347 | 6735482.408 |
| Hooded Crane | -4810317.799 | 6736603.56  |
| Hooded Crane | -4812138.986 | 6737040.205 |
| Hooded Crane | -5019832.212 | 7270579.963 |
| Hooded Crane | -5106772.735 | 7212452.158 |
| Hooded Crane | -4812159.023 | 6737085.128 |
| Hooded Crane | -5020460.054 | 7274666.336 |
| Hooded Crane | -5019500.48  | 7274366.275 |
| Hooded Crane | -5017812.877 | 7270043.606 |
| Hooded Crane | -4809580.864 | 6737622.434 |
| Hooded Crane | -5086594.964 | 7221853.686 |
| Hooded Crane | -4812018.76  | 6735349.461 |
| Hooded Crane | -5023788.507 | 7269401.564 |
| Hooded Crane | -4813603.95  | 6734672.185 |
| Hooded Crane | -5020787.334 | 7273212.302 |
| Hooded Crane | -4812152.344 | 6737081.534 |
| Hooded Crane | -4812152.344 | 6737088.722 |
| Hooded Crane | -5106492.209 | 7212144.948 |
| Hooded Crane | -4814278.546 | 6734745.838 |
| Hooded Crane | -5093525.715 | 7223204.513 |
| Hooded Crane | -5074020.314 | 7240405.529 |
| Hooded Crane | -4812415.058 | 6736423.877 |
| Hooded Crane | -5015450.677 | 7274006.602 |
| Hooded Crane | -4811909.667 | 6735435.696 |
| Hooded Crane | -4810967.904 | 6737148.022 |
| Hooded Crane | -4812408.379 | 6735268.616 |
| Hooded Crane | -5097152.504 | 7217873.262 |
| Hooded Crane | -5018336.078 | 7272089.267 |
| Hooded Crane | -5015757.919 | 7273712.336 |
| Hooded Crane | -5100970.763 | 7214085.728 |
| Hooded Crane | -5020399.942 | 7272077.73  |
| Hooded Crane | -5022931.347 | 7273085.376 |
| Hooded Crane | -5101269.099 | 7213564.704 |
| Hooded Crane | -4991991.208 | 7298172.535 |
| Hooded Crane | -5018743.508 | 7272914.22  |
| Hooded Crane | -5016839.944 | 7272754.607 |
| Hooded Crane | -4809529.657 | 6737568.522 |
| Hooded Crane | -4809632.071 | 6737631.42  |
| Hooded Crane | -4810727.454 | 6736975.515 |
| Hooded Crane | -5103085.833 | 7214665.956 |
| Hooded Crane | -5093180.625 | 7222669.504 |
| Hooded Crane | -4812159.023 | 6737094.113 |
| Hooded Crane | -4811923.026 | 6735494.984 |
| Hooded Crane | -4812147.891 | 6737074.346 |
| Hooded Crane | -4812722.3   | 6734920.094 |
| Hooded Crane | -5097876.081 | 7221112.455 |
| Hooded Crane | -4811802.801 | 6735814.784 |
| Hooded Crane | -5103506.621 | 7215183.236 |
| Hooded Crane | -4814225.113 | 6734541.048 |
| Hooded Crane | -5019304.558 | 7273041.144 |

|              |              |             |
|--------------|--------------|-------------|
| Hooded Crane | -5018694.527 | 7272948.836 |
| Hooded Crane | -4812116.722 | 6737083.331 |
| Hooded Crane | -4814352.017 | 6734769.192 |
| Hooded Crane | -4809514.072 | 6737854.26  |
| Hooded Crane | -4812150.117 | 6737077.94  |
| Hooded Crane | -4810235.422 | 6737557.74  |
| Hooded Crane | -5020411.074 | 7272077.73  |
| Hooded Crane | -4810642.852 | 6737252.246 |
| Hooded Crane | -4814225.113 | 6734544.641 |
| Hooded Crane | -5018937.204 | 7274348.964 |
| Hooded Crane | -4812147.891 | 6737110.286 |
| Hooded Crane | -4812150.117 | 6737056.377 |
| Hooded Crane | -5094471.931 | 7220501.183 |
| Hooded Crane | -5101191.175 | 7214757.575 |
| Hooded Crane | -5100037.905 | 7209687.702 |
| Hooded Crane | -5101028.649 | 7213709.747 |
| Hooded Crane | -4812150.117 | 6737061.768 |
| Hooded Crane | -4811983.138 | 6735410.544 |
| Hooded Crane | -4810647.304 | 6737255.84  |
| Hooded Crane | -4813960.172 | 6734799.731 |
| Hooded Crane | -4849319.695 | 6937430.13  |
| Hooded Crane | -4812150.117 | 6737056.377 |
| Hooded Crane | -5019246.672 | 7273112.299 |
| Hooded Crane | -4813136.408 | 6735130.283 |
| Hooded Crane | -4871686.008 | 6903837.522 |
| Hooded Crane | -5018398.417 | 7275776.278 |
| Hooded Crane | -4812152.344 | 6737059.971 |
| Hooded Crane | -5014373.104 | 7283794.891 |
| Hooded Crane | -4812152.344 | 6737081.534 |
| Hooded Crane | -4809910.369 | 6737239.667 |
| Hooded Crane | -5020678.24  | 7274485.529 |
| Hooded Crane | -5104566.382 | 7213030.357 |
| Hooded Crane | -4809861.389 | 6737354.675 |
| Hooded Crane | -4809988.293 | 6736765.277 |
| Hooded Crane | -5073793.222 | 7240734.923 |
| Hooded Crane | -5097299.446 | 7217936.276 |
| Hooded Crane | -5109455.534 | 7208079.847 |
| Hooded Crane | -5101890.262 | 7213024.632 |
| Hooded Crane | -5101876.903 | 7213318.518 |
| Hooded Crane | -5020310.886 | 7269297.766 |
| Hooded Crane | -5102798.629 | 7214929.364 |
| Hooded Crane | -4810941.188 | 6736501.14  |
| Hooded Crane | -4849488.901 | 6933786.362 |
| Hooded Crane | -4811923.026 | 6735428.51  |
| Hooded Crane | -5022646.369 | 7271950.822 |
| Hooded Crane | -4814229.566 | 6734533.862 |
| Hooded Crane | -4812448.454 | 6735390.782 |
| Hooded Crane | -5100006.736 | 7213784.178 |
| Hooded Crane | -4812130.08  | 6737052.783 |
| Hooded Crane | -4810718.549 | 6736984.5   |
| Hooded Crane | -4812130.08  | 6736966.53  |
| Hooded Crane | -4814245.15  | 6735511.153 |
| Hooded Crane | -4812136.759 | 6737059.971 |
| Hooded Crane | -5100046.811 | 7209758.28  |
| Hooded Crane | -5103344.094 | 7215492.475 |
| Hooded Crane | -5099813.04  | 7211723.269 |
| Hooded Crane | -4856947.307 | 6956542.17  |
| Hooded Crane | -4812481.85  | 6735514.746 |

|              |              |             |
|--------------|--------------|-------------|
| Hooded Crane | -4812744.564 | 6735020.696 |
| Hooded Crane | -4813595.044 | 6734783.563 |
| Hooded Crane | -4810785.341 | 6737171.382 |
| Hooded Crane | -4812096.684 | 6735706.985 |
| Hooded Crane | -4812161.249 | 6737076.143 |
| Hooded Crane | -4812165.702 | 6737054.58  |
| Hooded Crane | -4810177.536 | 6736267.557 |
| Hooded Crane | -4809469.544 | 6738425.765 |
| Hooded Crane | -4812145.665 | 6737063.565 |
| Hooded Crane | -5022866.782 | 7273025.759 |
| Hooded Crane | -5086623.907 | 7221853.686 |
| Hooded Crane | -5100979.668 | 7215047.709 |
| Hooded Crane | -4812130.08  | 6735814.784 |
| Hooded Crane | -5015991.69  | 7274006.602 |
| Hooded Crane | -5023530.246 | 7273906.589 |
| Hooded Crane | -4810916.698 | 6737031.22  |
| Hooded Crane | -4812577.584 | 6735698.002 |
| Hooded Crane | -5014417.632 | 7290672.941 |
| Hooded Crane | -5100178.168 | 7208863.707 |
| Hooded Crane | -4964312.729 | 7251467.01  |
| Hooded Crane | -4812163.476 | 6737079.737 |
| Hooded Crane | -5018186.91  | 7270810.666 |
| Hooded Crane | -5100814.915 | 7213904.415 |
| Hooded Crane | -4812150.117 | 6737079.737 |
| Hooded Crane | -4810564.928 | 6737511.017 |
| Hooded Crane | -4810881.075 | 6737049.189 |
| Hooded Crane | -5101805.659 | 7212580.007 |
| Hooded Crane | -4810694.059 | 6737227.089 |
| Hooded Crane | -5075053.359 | 7240401.699 |
| Hooded Crane | -4812330.455 | 6736555.045 |
| Hooded Crane | -4856312.786 | 6955941.912 |
| Hooded Crane | -4812141.212 | 6737065.362 |
| Hooded Crane | -5020402.168 | 7272075.807 |
| Hooded Crane | -4813868.89  | 6734639.849 |
| Hooded Crane | -4810217.611 | 6736707.777 |
| Hooded Crane | -4856370.672 | 6956954.066 |
| Hooded Crane | -4812259.211 | 6736720.355 |
| Hooded Crane | -5101583.02  | 7213131.498 |
| Hooded Crane | -4813109.691 | 6735455.459 |
| Hooded Crane | -4814222.886 | 6734532.066 |
| Hooded Crane | -4812526.377 | 6734925.483 |
| Hooded Crane | -4871672.649 | 6903833.852 |
| Hooded Crane | -4812159.023 | 6737067.159 |
| Hooded Crane | -5103092.512 | 7211721.361 |
| Hooded Crane | -4814238.471 | 6734535.659 |
| Hooded Crane | -5093398.811 | 7222763.128 |
| Hooded Crane | -4812154.57  | 6737061.768 |
| Hooded Crane | -4812780.186 | 6736878.481 |
| Hooded Crane | -5016423.609 | 7267838.972 |
| Hooded Crane | -5074069.295 | 7240426.594 |
| Hooded Crane | -5074064.842 | 7240422.764 |
| Hooded Crane | -4810262.139 | 6736483.172 |
| Hooded Crane | -4810239.875 | 6736876.685 |
| Hooded Crane | -4809407.205 | 6736698.793 |
| Hooded Crane | -4812150.117 | 6737067.159 |
| Hooded Crane | -5019306.784 | 7273054.606 |
| Hooded Crane | -5100993.027 | 7212797.546 |
| Hooded Crane | -4812138.986 | 6737065.362 |



|              |              |             |
|--------------|--------------|-------------|
| Hooded Crane | -5016606.173 | 7272791.145 |
| Hooded Crane | -4810954.546 | 6736918.013 |
| Hooded Crane | -4809643.203 | 6737643.999 |
| Hooded Crane | -4812163.476 | 6737074.346 |
| Hooded Crane | -5023372.172 | 7269726.423 |
| Hooded Crane | -4812130.08  | 6737090.519 |
| Hooded Crane | -4814307.489 | 6734585.957 |
| Hooded Crane | -5103413.112 | 7215618.465 |
| Hooded Crane | -4813054.032 | 6734329.077 |
| Hooded Crane | -4812167.929 | 6737103.098 |
| Hooded Crane | -5097163.636 | 7217863.715 |
| Hooded Crane | -4814087.077 | 6734823.085 |
| Hooded Crane | -5093456.697 | 7222887.325 |
| Hooded Crane | -4813229.917 | 6734373.986 |
| Hooded Crane | -4813287.803 | 6735114.114 |
| Hooded Crane | -4812130.08  | 6737094.113 |
| Hooded Crane | -4814227.339 | 6735579.424 |
| Hooded Crane | -4813766.476 | 6735063.812 |
| Hooded Crane | -4810328.931 | 6737572.117 |
| Hooded Crane | -5103021.268 | 7211902.623 |
| Hooded Crane | -5100563.333 | 7213900.598 |
| Hooded Crane | -4849471.09  | 6937656.769 |
| Hooded Crane | -4812147.891 | 6737063.565 |
| Hooded Crane | -4812150.117 | 6737070.753 |
| Hooded Crane | -5101979.317 | 7212305.23  |
| Hooded Crane | -5022403.693 | 7272712.301 |
| Hooded Crane | -4810006.104 | 6737496.64  |
| Hooded Crane | -5018445.171 | 7273471.931 |
| Hooded Crane | -5099543.647 | 7209422.565 |
| Hooded Crane | -4814360.923 | 6734744.042 |
| Hooded Crane | -4813490.404 | 6734959.616 |
| Hooded Crane | -4812152.344 | 6737077.94  |
| Hooded Crane | -5100803.783 | 7213952.128 |
| Hooded Crane | -5019845.571 | 7270028.227 |
| Hooded Crane | -4810647.304 | 6737182.164 |
| Hooded Crane | -5100574.465 | 7214024.653 |
| Hooded Crane | -5099425.648 | 7211690.833 |
| Hooded Crane | -4814165     | 6735396.172 |
| Hooded Crane | -5099757.38  | 7209315.749 |
| Hooded Crane | -5099919.907 | 7209331.008 |
| Hooded Crane | -4812138.986 | 6737077.94  |
| Hooded Crane | -4813557.196 | 6734587.754 |
| Hooded Crane | -4811927.478 | 6735451.866 |
| Hooded Crane | -4812746.79  | 6735405.154 |
| Hooded Crane | -4810656.21  | 6737491.249 |
| Hooded Crane | -4849911.915 | 6937542.528 |
| Hooded Crane | -5017926.423 | 7275764.736 |
| Hooded Crane | -4813394.669 | 6734772.785 |
| Hooded Crane | -5097421.897 | 7222778.413 |
| Hooded Crane | -5019952.437 | 7272021.967 |
| Hooded Crane | -5099543.647 | 7211770.969 |
| Hooded Crane | -4814229.566 | 6734544.641 |
| Hooded Crane | -4814276.32  | 6734546.437 |
| Hooded Crane | -4814229.566 | 6734713.502 |
| Hooded Crane | -4812228.041 | 6735380.002 |
| Hooded Crane | -5093416.622 | 7223179.672 |
| Hooded Crane | -5101095.441 | 7214309.034 |
| Hooded Crane | -4856205.919 | 6956510.771 |

|              |              |             |
|--------------|--------------|-------------|
| Hooded Crane | -5015285.924 | 7282706.907 |
| Hooded Crane | -5099686.136 | 7210071.119 |
| Hooded Crane | -4812165.702 | 6737058.174 |
| Hooded Crane | -4814205.075 | 6734848.235 |
| Hooded Crane | -5101888.035 | 7212730.757 |
| Hooded Crane | -4813247.728 | 6735157.231 |
| Hooded Crane | -5102115.127 | 7215307.312 |
| Hooded Crane | -4811179.412 | 6737200.134 |
| Hooded Crane | -5013979.033 | 7282508.583 |
| Hooded Crane | -5095614.069 | 7225616.331 |
| Hooded Crane | -4812156.797 | 6737074.346 |
| Hooded Crane | -5019660.78  | 7272539.231 |
| Hooded Crane | -4855905.357 | 6956473.831 |
| Hooded Crane | -5100636.804 | 7208100.825 |
| Hooded Crane | -4810874.396 | 6737241.464 |
| Hooded Crane | -5093323.114 | 7222870.128 |
| Hooded Crane | -4812152.344 | 6737068.956 |
| Hooded Crane | -4812143.438 | 6737070.753 |
| Hooded Crane | -5099877.605 | 7209273.786 |
| Hooded Crane | -4812399.473 | 6735556.068 |
| Hooded Crane | -5015593.166 | 7273898.895 |
| Hooded Crane | -4814109.341 | 6734772.785 |
| Hooded Crane | -4814311.942 | 6734663.203 |
| Hooded Crane | -5074069.295 | 7240418.934 |
| Hooded Crane | -5101554.077 | 7213459.74  |
| Hooded Crane | -4812535.283 | 6734907.518 |
| Hooded Crane | -4812143.438 | 6737077.94  |
| Hooded Crane | -4811108.167 | 6736686.215 |
| Hooded Crane | -5018260.381 | 7270547.281 |
| Hooded Crane | -5019447.047 | 7275052.97  |
| Hooded Crane | -4810636.172 | 6737257.637 |
| Hooded Crane | -4813265.539 | 6734458.415 |
| Hooded Crane | -4855658.227 | 6955871.731 |
| Hooded Crane | -5101983.77  | 7212986.466 |
| Hooded Crane | -5021566.57  | 7272096.958 |
| Hooded Crane | -5023389.983 | 7269659.143 |
| Hooded Crane | -5023376.625 | 7269730.268 |
| Hooded Crane | -4812163.476 | 6737124.661 |
| Hooded Crane | -4856858.251 | 6953094.539 |
| Hooded Crane | -4812557.547 | 6735534.509 |
| Hooded Crane | -5019847.797 | 7270026.305 |
| Hooded Crane | -4812152.344 | 6737090.519 |
| Hooded Crane | -4812125.627 | 6737040.205 |
| Hooded Crane | -4810694.059 | 6737268.419 |
| Hooded Crane | -5105205.356 | 7212436.893 |
| Hooded Crane | -5103566.733 | 7215337.854 |
| Hooded Crane | -4856052.298 | 6956290.98  |
| Hooded Crane | -4812147.891 | 6737061.768 |
| Hooded Crane | -4812829.166 | 6735480.611 |
| Hooded Crane | -4812152.344 | 6737085.128 |
| Hooded Crane | -4812145.665 | 6737094.113 |
| Hooded Crane | -5101890.262 | 7212406.362 |
| Hooded Crane | -4813318.972 | 6735121.3   |
| Hooded Crane | -4814320.848 | 6734670.388 |
| Hooded Crane | -5093616.997 | 7223559.932 |
| Hooded Crane | -4812145.665 | 6737067.159 |
| Hooded Crane | -4810453.608 | 6737622.434 |
| Hooded Crane | -4810224.29  | 6737568.522 |

|              |              |             |
|--------------|--------------|-------------|
| Hooded Crane | -4810832.095 | 6737140.834 |
| Hooded Crane | -4810346.742 | 6737379.834 |
| Hooded Crane | -4812840.298 | 6735159.027 |
| Hooded Crane | -4812132.306 | 6735751.901 |
| Hooded Crane | -4812740.111 | 6735092.556 |
| Hooded Crane | -4812154.57  | 6737068.956 |
| Hooded Crane | -5019438.141 | 7275043.352 |
| Hooded Crane | -4813103.012 | 6734853.625 |
| Hooded Crane | -4855760.641 | 6955487.594 |
| Hooded Crane | -5101113.252 | 7214330.029 |
| Hooded Crane | -4810351.195 | 6737473.279 |
| Hooded Crane | -5105240.978 | 7212984.557 |
| Hooded Crane | -4812147.891 | 6737081.534 |
| Hooded Crane | -4812196.872 | 6736912.623 |
| Hooded Crane | -5020578.053 | 7271950.822 |
| Hooded Crane | -5103640.204 | 7215467.659 |
| Hooded Crane | -4814222.886 | 6734506.917 |
| Hooded Crane | -4813454.782 | 6734569.79  |
| Hooded Crane | -5101021.97  | 7212881.509 |
| Hooded Crane | -4812130.08  | 6737095.91  |
| Hooded Crane | -4812125.627 | 6737076.143 |
| Hooded Crane | -4811157.148 | 6736781.449 |
| Hooded Crane | -5019725.346 | 7270053.218 |
| Hooded Crane | -5016054.029 | 7273745.032 |
| Hooded Crane | -4813160.898 | 6734359.615 |
| Hooded Crane | -4813374.632 | 6734679.37  |
| Hooded Crane | -5099957.755 | 7212020.922 |
| Hooded Crane | -5093149.455 | 7222726.825 |
| Hooded Crane | -4813082.975 | 6734850.032 |
| Hooded Crane | -5102003.808 | 7212471.24  |
| Hooded Crane | -5097132.467 | 7217854.167 |
| Hooded Crane | -5100316.204 | 7214232.689 |
| Hooded Crane | -5016661.833 | 7272050.809 |
| Hooded Crane | -5103615.714 | 7215087.794 |
| Hooded Crane | -4856931.722 | 6956346.389 |
| Hooded Crane | -4811934.158 | 6735500.374 |
| Hooded Crane | -5105724.105 | 7213879.604 |
| Hooded Crane | -4814256.282 | 6734659.61  |
| Hooded Crane | -4814231.792 | 6734492.546 |
| Hooded Crane | -4812156.797 | 6737058.174 |
| Hooded Crane | -5102999.004 | 7215671.915 |
| Hooded Crane | -4810863.264 | 6736657.465 |
| Hooded Crane | -4814082.624 | 6735155.434 |
| Hooded Crane | -5102527.009 | 7212574.282 |
| Hooded Crane | -4810324.478 | 6736517.312 |
| Hooded Crane | -5096420.022 | 7220359.834 |
| Hooded Crane | -4810371.232 | 6737403.195 |
| Hooded Crane | -4809856.936 | 6736977.312 |
| Hooded Crane | -4810907.792 | 6737085.128 |
| Hooded Crane | -5102072.826 | 7215280.588 |
| Hooded Crane | -4811976.459 | 6735548.882 |
| Hooded Crane | -4858766.267 | 6953048.384 |
| Hooded Crane | -4812141.212 | 6736849.731 |
| Hooded Crane | -4810239.875 | 6736436.455 |
| Hooded Crane | -5100968.536 | 7212828.078 |
| Hooded Crane | -4812034.345 | 6736803.012 |
| Hooded Crane | -4810651.757 | 6737255.84  |
| Hooded Crane | -5018371.701 | 7271598.951 |

|              |              |             |
|--------------|--------------|-------------|
| Hooded Crane | -4809556.373 | 6737663.767 |
| Hooded Crane | -4814225.113 | 6734751.227 |
| Hooded Crane | -5099788.55  | 7211896.899 |
| Hooded Crane | -4810291.082 | 6736547.858 |
| Hooded Crane | -4812143.438 | 6737083.331 |
| Hooded Crane | -4814245.15  | 6735518.34  |
| Hooded Crane | -5020453.375 | 7274664.413 |
| Hooded Crane | -4809890.332 | 6737372.645 |
| Hooded Crane | -5101099.893 | 7213515.084 |
| Hooded Crane | -4813419.16  | 6734699.131 |
| Hooded Crane | -5101974.865 | 7215108.791 |
| Hooded Crane | -5105561.579 | 7228023.161 |
| Hooded Crane | -5021559.891 | 7274370.122 |
| Hooded Crane | -4812147.891 | 6737072.55  |
| Hooded Crane | -5017561.295 | 7273244.996 |
| Hooded Crane | -4814236.245 | 6734555.419 |
| Hooded Crane | -4812107.816 | 6735694.408 |
| Hooded Crane | -5101928.11  | 7212728.848 |
| Hooded Crane | -4810849.906 | 6737187.555 |
| Hooded Crane | -5101489.512 | 7213349.052 |
| Hooded Crane | -4812379.436 | 6736303.493 |
| Hooded Crane | -5020620.354 | 7274800.983 |
| Hooded Crane | -4810649.531 | 6737250.449 |
| Hooded Crane | -5093345.378 | 7223152.921 |
| Hooded Crane | -4814225.113 | 6734524.88  |
| Hooded Crane | -4814136.057 | 6735277.599 |
| Hooded Crane | -4812415.058 | 6736413.097 |
| Hooded Crane | -5074069.295 | 7240417.019 |
| Hooded Crane | -5104646.532 | 7213053.257 |
| Hooded Crane | -5021593.287 | 7272746.915 |
| Hooded Crane | -4810631.72  | 6737248.652 |
| Hooded Crane | -4809649.882 | 6737437.338 |
| Hooded Crane | -5101921.431 | 7212646.794 |
| Hooded Crane | -5101131.063 | 7213415.846 |
| Hooded Crane | -4812152.344 | 6737068.956 |
| Hooded Crane | -4811054.734 | 6736610.747 |
| Hooded Crane | -4813481.499 | 6734830.271 |
| Hooded Crane | -5017104.885 | 7270653.018 |
| Hooded Crane | -4812156.797 | 6737072.55  |
| Hooded Crane | -4812147.891 | 6736903.638 |
| Hooded Crane | -5101937.016 | 7213118.14  |
| Hooded Crane | -4812147.891 | 6737074.346 |
| Hooded Crane | -4855197.365 | 6955847.722 |
| Hooded Crane | -4963344.25  | 7249352     |
| Hooded Crane | -4813031.768 | 6734939.855 |
| Hooded Crane | -4812517.472 | 6736001.64  |
| Hooded Crane | -4812167.929 | 6735778.851 |
| Hooded Crane | -5103544.469 | 7215402.756 |
| Hooded Crane | -5099029.351 | 7213083.79  |
| Hooded Crane | -4809556.373 | 6737566.725 |
| Hooded Crane | -5103134.814 | 7214688.861 |
| Hooded Crane | -5099565.911 | 7211076.485 |
| Hooded Crane | -5022762.141 | 7272027.735 |
| Hooded Crane | -4813305.614 | 6735114.114 |
| Hooded Crane | -5093314.208 | 7222917.896 |
| Hooded Crane | -5100271.676 | 7214272.77  |
| Hooded Crane | -4963480.06  | 7249467.035 |
| Hooded Crane | -4810658.436 | 6737245.058 |

|              |              |             |
|--------------|--------------|-------------|
| Hooded Crane | -5104207.934 | 7211534.38  |
| Hooded Crane | -5099521.383 | 7210969.647 |
| Hooded Crane | -4813321.199 | 6735133.876 |
| Hooded Crane | -4811918.573 | 6735460.848 |
| Hooded Crane | -4813314.519 | 6735106.928 |
| Hooded Crane | -4812132.306 | 6737065.362 |
| Hooded Crane | -4963299.722 | 7249459.366 |
| Hooded Crane | -5103324.057 | 7215475.295 |
| Hooded Crane | -5100810.463 | 7213856.702 |
| Hooded Crane | -5101079.856 | 7214255.593 |
| Hooded Crane | -4814151.642 | 6735211.127 |
| Hooded Crane | -4813828.815 | 6734496.138 |
| Hooded Crane | -4855560.266 | 6955777.542 |
| Hooded Crane | -4811243.977 | 6737054.58  |
| Hooded Crane | -4813572.781 | 6734648.831 |
| Hooded Crane | -5017803.971 | 7270047.451 |
| Hooded Crane | -4812408.379 | 6735473.425 |
| Hooded Crane | -4813287.803 | 6735114.114 |
| Hooded Crane | -4810910.018 | 6737165.991 |
| Hooded Crane | -5097132.467 | 7217865.624 |
| Hooded Crane | -4812138.986 | 6737079.737 |
| Hooded Crane | -5018997.316 | 7273821.963 |
| Hooded Crane | -5100897.292 | 7214461.726 |
| Hooded Crane | -5099608.212 | 7211047.868 |
| Hooded Crane | -4812165.702 | 6737085.128 |
| Hooded Crane | -4812152.344 | 6737054.58  |
| Hooded Crane | -5024291.671 | 7272693.07  |
| Hooded Crane | -4812141.212 | 6737065.362 |
| Hooded Crane | -4810943.414 | 6736900.044 |
| Hooded Crane | -4813969.078 | 6734815.899 |
| Hooded Crane | -4812130.08  | 6737086.925 |
| Hooded Crane | -5017806.198 | 7270060.907 |
| Hooded Crane | -4810640.625 | 6737257.637 |
| Hooded Crane | -4813775.382 | 6735062.016 |
| Hooded Crane | -5018823.658 | 7273660.408 |
| Hooded Crane | -4809543.015 | 6737584.696 |
| Hooded Crane | -4814196.17  | 6734756.617 |
| Hooded Crane | -4812190.192 | 6737110.286 |
| Hooded Crane | -5099862.021 | 7211952.232 |
| Hooded Crane | -4810676.247 | 6737245.058 |
| Hooded Crane | -4812332.681 | 6735629.73  |
| Hooded Crane | -5093432.207 | 7222984.773 |
| Hooded Crane | -5019567.272 | 7274452.83  |
| Hooded Crane | -4812147.891 | 6737074.346 |
| Hooded Crane | -5015450.677 | 7273995.062 |
| Hooded Crane | -5102947.797 | 7215376.032 |
| Hooded Crane | -5100843.859 | 7214226.963 |
| Hooded Crane | -5101908.073 | 7212662.06  |
| Hooded Crane | -4809640.976 | 6738183.14  |
| Hooded Crane | -4814305.263 | 6735604.577 |
| Hooded Crane | -5097375.143 | 7217976.376 |
| Hooded Crane | -5101925.884 | 7212207.916 |
| Hooded Crane | -5101571.888 | 7213520.81  |
| Hooded Crane | -5020170.624 | 7274700.959 |
| Hooded Crane | -4814323.074 | 6734621.885 |
| Hooded Crane | -4857141.003 | 6960107.715 |
| Hooded Crane | -4811943.063 | 6735518.34  |
| Hooded Crane | -5101222.345 | 7214475.087 |

|              |              |             |
|--------------|--------------|-------------|
| Hooded Crane | -5020063.757 | 7272927.682 |
| Hooded Crane | -4814245.15  | 6734526.677 |
| Hooded Crane | -5101102.12  | 7214312.851 |
| Hooded Crane | -5103163.757 | 7215481.021 |
| Hooded Crane | -4812125.627 | 6736997.078 |
| Hooded Crane | -5099548.1   | 7210313.387 |
| Hooded Crane | -4812726.752 | 6736948.561 |
| Hooded Crane | -4812167.929 | 6737068.956 |
| Hooded Crane | -4810649.531 | 6737246.855 |
| Hooded Crane | -4810642.852 | 6737241.464 |
| Hooded Crane | -5102462.444 | 7212566.65  |
| Hooded Crane | -4814314.168 | 6734693.742 |
| Hooded Crane | -5017156.092 | 7268181.062 |
| Hooded Crane | -5018525.321 | 7277167.296 |
| Hooded Crane | -5075828.143 | 7240240.837 |
| Hooded Crane | -4855647.095 | 6956381.481 |
| Hooded Crane | -4812123.401 | 6737081.534 |
| Hooded Crane | -4809881.426 | 6737101.301 |
| Hooded Crane | -4813454.782 | 6734569.79  |
| Hooded Crane | -4856343.955 | 6956728.721 |
| Hooded Crane | -4812154.57  | 6737063.565 |
| Hooded Crane | -4814227.339 | 6734533.862 |
| Hooded Crane | -4813285.576 | 6735117.707 |
| Hooded Crane | -4811940.837 | 6735401.561 |
| Hooded Crane | -5103577.865 | 7215484.839 |
| Hooded Crane | -4812134.533 | 6737077.94  |
| Hooded Crane | -5102366.709 | 7212639.162 |
| Hooded Crane | -4810941.188 | 6736959.343 |
| Hooded Crane | -5100981.895 | 7213677.303 |
| Hooded Crane | -5101600.831 | 7213312.793 |
| Hooded Crane | -5075033.321 | 7240395.954 |
| Hooded Crane | -5102092.863 | 7212822.353 |
| Hooded Crane | -4812114.495 | 6735265.023 |
| Hooded Crane | -4812757.922 | 6736885.669 |
| Hooded Crane | -4812646.602 | 6735031.475 |
| Hooded Crane | -4811840.649 | 6735746.511 |
| Hooded Crane | -5101634.227 | 7212496.046 |
| Hooded Crane | -4813056.258 | 6734354.226 |
| Hooded Crane | -5027713.632 | 7270956.781 |
| Hooded Crane | -4810629.493 | 6737232.48  |
| Hooded Crane | -4814271.867 | 6734539.251 |
| Hooded Crane | -4812018.76  | 6735358.444 |
| Hooded Crane | -5099730.664 | 7209342.453 |
| Hooded Crane | -5100754.803 | 7214106.722 |
| Hooded Crane | -5101952.601 | 7212952.116 |
| Hooded Crane | -4810869.943 | 6737042.001 |
| Hooded Crane | -5103337.415 | 7215460.023 |
| Hooded Crane | -5103366.358 | 7215412.301 |
| Hooded Crane | -5109860.737 | 7207631.69  |
| Hooded Crane | -4858641.59  | 6957783.463 |
| Hooded Crane | -4812150.117 | 6737076.143 |
| Hooded Crane | -5094630.005 | 7222379.086 |
| Hooded Crane | -4809269.169 | 6737333.111 |
| Hooded Crane | -4810636.172 | 6737279.201 |
| Hooded Crane | -4813258.86  | 6734995.546 |
| Hooded Crane | -5101088.761 | 7214236.507 |
| Hooded Crane | -4812176.834 | 6737092.316 |
| Hooded Crane | -5101093.214 | 7213335.693 |

|              |              |             |
|--------------|--------------|-------------|
| Hooded Crane | -5099109.501 | 7212923.492 |
| Hooded Crane | -4963337.571 | 7249359.669 |
| Hooded Crane | -4812143.438 | 6737072.55  |
| Hooded Crane | -4813575.007 | 6734612.903 |
| Hooded Crane | -4813501.536 | 6734792.545 |
| Hooded Crane | -4812996.146 | 6734921.89  |
| Hooded Crane | -5019444.82  | 7275054.894 |
| Hooded Crane | -5097123.561 | 7217892.358 |
| Hooded Crane | -5075031.095 | 7240380.634 |
| Hooded Crane | -5076520.55  | 7240459.15  |
| Hooded Crane | -4812125.627 | 6737085.128 |
| Hooded Crane | -4812152.344 | 6737086.925 |
| Hooded Crane | -4812713.394 | 6737004.266 |
| Hooded Crane | -5100296.167 | 7212270.884 |
| Hooded Crane | -4812150.117 | 6737072.55  |
| Hooded Crane | -5016977.981 | 7269787.936 |
| Hooded Crane | -5100814.915 | 7213948.311 |
| Hooded Crane | -4814567.977 | 6734765.599 |
| Hooded Crane | -5099790.776 | 7212040.003 |
| Hooded Crane | -4855388.834 | 6956459.055 |
| Hooded Crane | -5101035.328 | 7213614.324 |
| Hooded Crane | -5099890.964 | 7211477.141 |
| Hooded Crane | -4812161.249 | 6737076.143 |
| Hooded Crane | -4856301.654 | 6956272.51  |
| Hooded Crane | -5099670.551 | 7210078.749 |
| Hooded Crane | -4812187.966 | 6734673.981 |
| Hooded Crane | -5103435.376 | 7215393.212 |
| Hooded Crane | -5103108.097 | 7215074.433 |
| Hooded Crane | -4810645.078 | 6737255.84  |
| Hooded Crane | -4814171.679 | 6734762.006 |
| Hooded Crane | -5093407.717 | 7222896.878 |
| Hooded Crane | -5103337.415 | 7214757.575 |
| Hooded Crane | -5022005.169 | 7271333.617 |
| Hooded Crane | -5100120.282 | 7211866.37  |
| Hooded Crane | -5101093.214 | 7214278.496 |
| Hooded Crane | -4812682.225 | 6735085.37  |
| Hooded Crane | -4812831.393 | 6735079.981 |
| Hooded Crane | -4813494.857 | 6734656.017 |
| Hooded Crane | -4813103.012 | 6735367.426 |
| Hooded Crane | -5093289.718 | 7222736.378 |
| Hooded Crane | -5100126.961 | 7211723.269 |
| Hooded Crane | -4812163.476 | 6737086.925 |
| Hooded Crane | -4813835.495 | 6734673.981 |
| Hooded Crane | -5099510.251 | 7210914.32  |
| Hooded Crane | -4964170.24  | 7251307.836 |
| Hooded Crane | -4812374.983 | 6735730.341 |
| Hooded Crane | -4810331.157 | 6737503.829 |
| Hooded Crane | -4813312.293 | 6735110.521 |
| Hooded Crane | -5086621.68  | 7221840.313 |
| Hooded Crane | -4811410.956 | 6736377.161 |
| Hooded Crane | -4812159.023 | 6737070.753 |
| Hooded Crane | -5074071.521 | 7240409.359 |
| Hooded Crane | -4856168.071 | 6956429.503 |
| Hooded Crane | -5092561.688 | 7220942.44  |
| Hooded Crane | -4812138.986 | 6737061.768 |
| Hooded Crane | -4812049.93  | 6736785.043 |
| Hooded Crane | -4812711.168 | 6736910.826 |
| Hooded Crane | -4809859.162 | 6737379.834 |

|              |              |             |
|--------------|--------------|-------------|
| Hooded Crane | -5016748.662 | 7275468.479 |
| Hooded Crane | -5103689.185 | 7214780.48  |
| Hooded Crane | -5100984.121 | 7212892.959 |
| Hooded Crane | -5099565.911 | 7211118.458 |
| Hooded Crane | -5104548.571 | 7213041.807 |
| Hooded Crane | -5104553.024 | 7213037.99  |
| Hooded Crane | -4809868.068 | 6736952.155 |
| Hooded Crane | -4963515.682 | 7249127.685 |
| Hooded Crane | -5101609.737 | 7213440.656 |
| Hooded Crane | -5097535.443 | 7221104.814 |
| Hooded Crane | -4812147.891 | 6737068.956 |
| Hooded Crane | -4810943.414 | 6737047.392 |
| Hooded Crane | -4814262.961 | 6734560.808 |
| Hooded Crane | -4812555.32  | 6734984.767 |
| Hooded Crane | -5103865.069 | 7214948.452 |
| Hooded Crane | -5023806.318 | 7269372.731 |
| Hooded Crane | -5099844.209 | 7209420.657 |
| Hooded Crane | -4812150.117 | 6737083.331 |
| Hooded Crane | -5100679.106 | 7214221.238 |
| Hooded Crane | -4810674.021 | 6737372.645 |
| Hooded Crane | -5099679.457 | 7210095.918 |
| Hooded Crane | -4812147.891 | 6737092.316 |
| Hooded Crane | -5101042.007 | 7212799.454 |
| Hooded Crane | -4816137.582 | 6741524.821 |
| Hooded Crane | -5101959.28  | 7212894.867 |
| Hooded Crane | -5099485.761 | 7211938.876 |
| Hooded Crane | -4811747.141 | 6735755.494 |
| Hooded Crane | -5100336.242 | 7214291.857 |
| Hooded Crane | -4812154.57  | 6737061.768 |
| Hooded Crane | -4809672.146 | 6737430.15  |
| Hooded Crane | -4812145.665 | 6737088.722 |
| Hooded Crane | -4812141.212 | 6737052.783 |
| Hooded Crane | -4812125.627 | 6735600.984 |
| Hooded Crane | -5101367.06  | 7213505.542 |
| Hooded Crane | -4810838.774 | 6737169.585 |
| Hooded Crane | -4809870.294 | 6737480.467 |
| Hooded Crane | -4856444.143 | 6956283.592 |
| Hooded Crane | -5101066.497 | 7214299.491 |
| Hooded Crane | -5100291.714 | 7214278.496 |
| Hooded Crane | -5101006.385 | 7214184.974 |
| Hooded Crane | -5099167.387 | 7213232.641 |
| Hooded Crane | -4812147.891 | 6736898.247 |
| Hooded Crane | -4810636.172 | 6737246.855 |
| Hooded Crane | -4810631.72  | 6737250.449 |
| Hooded Crane | -4814222.886 | 6734548.233 |
| Hooded Crane | -4812020.987 | 6735365.63  |
| Hooded Crane | -4813318.972 | 6735126.69  |
| Hooded Crane | -5093238.511 | 7223011.523 |
| Hooded Crane | -4812731.205 | 6736935.983 |
| Hooded Crane | -4810867.717 | 6737173.179 |
| Hooded Crane | -4812165.702 | 6737043.798 |
| Hooded Crane | -5096898.696 | 7223099.419 |
| Hooded Crane | -4809861.389 | 6736968.327 |
| Hooded Crane | -4814240.698 | 6734562.604 |
| Hooded Crane | -5100276.129 | 7214253.684 |
| Hooded Crane | -4809990.519 | 6736497.547 |
| Hooded Crane | -5101807.885 | 7212478.873 |
| Hooded Crane | -5097116.882 | 7217871.353 |



|              |              |             |
|--------------|--------------|-------------|
| Hooded Crane | -4813608.403 | 6734729.67  |
| Hooded Crane | -5093220.7   | 7223365.023 |
| Hooded Crane | -4810867.717 | 6737169.585 |
| Hooded Crane | -5021724.644 | 7274375.892 |
| Hooded Crane | -4812141.212 | 6737081.534 |
| Hooded Crane | -4812159.023 | 6737068.956 |
| Hooded Crane | -5100260.544 | 7214267.044 |
| Hooded Crane | -4812199.098 | 6737113.879 |
| Hooded Crane | -4812136.759 | 6737086.925 |
| Hooded Crane | -4811028.017 | 6736887.466 |
| Hooded Crane | -5100725.86  | 7213900.598 |
| Hooded Crane | -4810845.453 | 6737435.541 |
| Hooded Crane | -4814236.245 | 6734557.215 |
| Hooded Crane | -5093267.454 | 7223068.846 |
| Hooded Crane | -4812150.117 | 6737072.55  |
| Hooded Crane | -4812234.72  | 6735830.954 |
| Hooded Crane | -5103099.191 | 7215597.466 |
| Hooded Crane | -4814180.585 | 6734855.421 |
| Hooded Crane | -4813514.894 | 6734778.174 |
| Hooded Crane | -5091775.773 | 7219605.375 |
| Hooded Crane | -5020618.128 | 7275016.422 |
| Hooded Crane | -5101391.55  | 7212898.684 |
| Hooded Crane | -5099069.426 | 7210263.788 |
| Hooded Crane | -5075946.141 | 7240556.819 |
| Hooded Crane | -5075705.691 | 7240281.052 |
| Hooded Crane | -4812156.797 | 6737045.595 |
| Hooded Crane | -5021691.248 | 7272581.536 |
| Hooded Crane | -4812130.08  | 6737083.331 |
| Hooded Crane | -4812161.249 | 6737070.753 |
| Hooded Crane | -4813082.975 | 6735663.866 |
| Hooded Crane | -4812138.986 | 6737068.956 |
| Hooded Crane | -4812366.077 | 6736177.719 |
| Hooded Crane | -4810892.207 | 6737162.397 |
| Hooded Crane | -5103704.769 | 7215601.284 |
| Hooded Crane | -4812415.058 | 6735457.255 |
| Hooded Crane | -4812831.393 | 6736794.027 |
| Hooded Crane | -4809638.75  | 6737629.623 |
| Hooded Crane | -5100959.631 | 7212833.803 |
| Hooded Crane | -5104806.832 | 7215099.247 |
| Hooded Crane | -5100229.375 | 7214303.308 |
| Hooded Crane | -4812141.212 | 6737072.55  |
| Hooded Crane | -4813479.272 | 6734779.97  |
| Hooded Crane | -4812170.155 | 6735719.561 |
| Hooded Crane | -5101836.828 | 7212518.945 |
| Hooded Crane | -4812312.644 | 6735780.648 |
| Hooded Crane | -5097121.335 | 7217844.62  |
| Hooded Crane | -4809805.729 | 6737568.522 |
| Hooded Crane | -5093274.133 | 7222873.949 |
| Hooded Crane | -4849455.505 | 6937649.399 |
| Hooded Crane | -4813343.462 | 6734481.767 |
| Hooded Crane | -4812145.665 | 6737074.346 |
| Hooded Crane | -4811947.516 | 6735444.679 |
| Hooded Crane | -4812145.665 | 6735795.021 |
| Hooded Crane | -4811117.073 | 6736919.81  |
| Hooded Crane | -5099968.887 | 7211645.042 |
| Hooded Crane | -4812159.023 | 6737076.143 |
| Hooded Crane | -4812713.394 | 6735132.08  |
| Hooded Crane | -5099191.877 | 7212383.464 |

|              |              |             |
|--------------|--------------|-------------|
| Hooded Crane | -4814218.434 | 6734555.419 |
| Hooded Crane | -5097123.561 | 7217856.077 |
| Hooded Crane | -4812766.827 | 6735514.746 |
| Hooded Crane | -5101010.838 | 7213812.806 |
| Hooded Crane | -4810769.756 | 6737428.353 |
| Hooded Crane | -4813321.199 | 6735117.707 |
| Hooded Crane | -5101609.737 | 7213270.808 |
| Hooded Crane | -4855268.609 | 6956514.465 |
| Hooded Crane | -5101133.289 | 7207170.211 |
| Hooded Crane | -5099572.59  | 7210378.247 |
| Hooded Crane | -5100233.828 | 7208396.433 |
| Hooded Crane | -5100367.411 | 7207959.7   |
| Hooded Crane | -5019453.726 | 7275174.158 |
| Hooded Crane | -4812159.023 | 6737088.722 |
| Hooded Crane | -4812666.64  | 6736995.281 |
| Hooded Crane | -4812176.834 | 6737047.392 |
| Hooded Crane | -5021740.228 | 7272885.374 |
| Hooded Crane | -5022940.252 | 7272183.488 |
| Hooded Crane | -4813245.501 | 6734893.147 |
| Hooded Crane | -4856662.329 | 6956416.574 |
| Hooded Crane | -4811076.998 | 6736581.998 |
| Hooded Crane | -4811114.846 | 6736608.95  |
| Hooded Crane | -5103506.621 | 7215162.239 |
| Hooded Crane | -4812014.308 | 6735347.664 |
| Hooded Crane | -5101102.12  | 7213375.77  |
| Hooded Crane | -4812161.249 | 6737072.55  |
| Hooded Crane | -4812199.098 | 6735775.258 |
| Hooded Crane | -4813942.361 | 6734799.731 |
| Hooded Crane | -5099703.947 | 7210446.924 |
| Hooded Crane | -5022457.126 | 7272718.07  |
| Hooded Crane | -5101142.195 | 7213469.282 |
| Hooded Crane | -4812708.941 | 6735017.103 |
| Hooded Crane | -4813321.199 | 6735101.539 |
| Hooded Crane | -4812143.438 | 6735775.258 |
| Hooded Crane | -5075026.642 | 7240372.973 |
| Hooded Crane | -4856838.214 | 6956575.417 |
| Hooded Crane | -4812141.212 | 6737077.94  |
| Hooded Crane | -4813263.312 | 6734463.804 |
| Hooded Crane | -5102014.94  | 7213007.457 |
| Hooded Crane | -5100986.347 | 7212812.812 |
| Hooded Crane | -4812138.986 | 6737065.362 |
| Hooded Crane | -4810834.321 | 6737176.773 |
| Hooded Crane | -4812617.659 | 6735121.3   |
| Hooded Crane | -5101979.317 | 7212797.546 |
| Hooded Crane | -4813241.048 | 6735168.01  |
| Hooded Crane | -4813359.047 | 6735099.742 |
| Hooded Crane | -4964312.729 | 7251495.776 |
| Hooded Crane | -4811825.065 | 6736980.906 |
| Hooded Crane | -4855538.002 | 6956350.083 |
| Hooded Crane | -4812138.986 | 6737067.159 |
| Hooded Crane | -5101578.567 | 7213287.984 |
| Hooded Crane | -5097132.467 | 7217856.077 |
| Hooded Crane | -4812147.891 | 6737077.94  |
| Hooded Crane | -4857412.622 | 6955792.317 |
| Hooded Crane | -4812150.117 | 6737050.986 |
| Hooded Crane | -4810912.245 | 6737077.94  |
| Hooded Crane | -5103019.041 | 7215620.374 |
| Hooded Crane | -5103388.622 | 7215578.377 |

|              |              |             |
|--------------|--------------|-------------|
| Hooded Crane | -5093432.207 | 7223017.256 |
| Hooded Crane | -5100302.846 | 7214280.405 |
| Hooded Crane | -5101088.761 | 7214524.712 |
| Hooded Crane | -5100269.45  | 7214291.857 |
| Hooded Crane | -5103502.168 | 7215526.836 |
| Hooded Crane | -4812134.533 | 6737043.798 |
| Hooded Crane | -4810874.396 | 6737164.194 |
| Hooded Crane | -4810573.833 | 6737514.611 |
| Hooded Crane | -4813423.612 | 6734559.012 |
| Hooded Crane | -4812094.458 | 6735306.343 |
| Hooded Crane | -4812764.601 | 6735130.283 |
| Hooded Crane | -4812152.344 | 6737081.534 |
| Hooded Crane | -4812170.155 | 6737104.895 |
| Hooded Crane | -4812147.891 | 6736901.841 |
| Hooded Crane | -5003597.378 | 7286450.983 |
| Hooded Crane | -5101794.527 | 7212394.913 |
| Hooded Crane | -4812145.665 | 6737052.783 |
| Hooded Crane | -4814307.489 | 6735660.272 |
| Hooded Crane | -5100819.368 | 7214284.222 |
| Hooded Crane | -5100964.084 | 7212801.362 |
| Hooded Crane | -4964920.534 | 7250318.352 |
| Hooded Crane | -5101919.205 | 7212976.924 |
| Hooded Crane | -5016808.775 | 7271202.876 |
| Hooded Crane | -5102119.58  | 7215072.524 |
| Hooded Crane | -5101155.553 | 7215112.609 |
| Hooded Crane | -4855607.02  | 6956002.86  |
| Hooded Crane | -4812143.438 | 6737061.768 |
| Hooded Crane | -5099178.519 | 7213261.267 |
| Hooded Crane | -4811900.762 | 6735683.629 |
| Hooded Crane | -5103355.226 | 7214790.024 |
| Hooded Crane | -4814225.113 | 6734553.622 |
| Hooded Crane | -4814198.396 | 6734533.862 |
| Hooded Crane | -4814267.414 | 6734762.006 |
| Hooded Crane | -5099541.42  | 7209401.583 |
| Hooded Crane | -5101095.441 | 7214299.491 |
| Hooded Crane | -5101104.346 | 7214505.626 |
| Hooded Crane | -5097154.731 | 7217871.353 |
| Hooded Crane | -5101819.017 | 7212375.831 |
| Hooded Crane | -5102086.184 | 7215299.676 |
| Hooded Crane | -5086594.964 | 7221861.328 |
| Hooded Crane | -5102190.824 | 7212665.877 |
| Hooded Crane | -5099534.741 | 7211248.192 |
| Hooded Crane | -5103535.564 | 7215169.874 |
| Hooded Crane | -4812152.344 | 6737061.768 |
| Hooded Crane | -4814231.792 | 6734530.269 |
| Hooded Crane | -5102874.326 | 7215471.477 |
| Hooded Crane | -4812150.117 | 6737065.362 |
| Hooded Crane | -4855898.677 | 6956237.418 |
| Hooded Crane | -4812152.344 | 6737074.346 |
| Hooded Crane | -4812118.948 | 6737077.94  |
| Hooded Crane | -5097139.146 | 7217865.624 |
| Hooded Crane | -5104397.177 | 7214770.936 |
| Hooded Crane | -5101680.981 | 7213247.908 |
| Hooded Crane | -5017138.281 | 7268182.984 |
| Hooded Crane | -4813307.84  | 6735117.707 |
| Hooded Crane | -5020010.323 | 7274789.442 |
| Hooded Crane | -5097145.825 | 7217880.901 |
| Hooded Crane | -4856335.05  | 6956470.137 |

|              |              |             |
|--------------|--------------|-------------|
| Hooded Crane | -4812143.438 | 6737065.362 |
| Hooded Crane | -5103488.81  | 7215177.509 |
| Hooded Crane | -5102152.976 | 7215070.615 |
| Hooded Crane | -5101598.605 | 7213448.289 |
| Hooded Crane | -5101896.941 | 7212709.766 |
| Hooded Crane | -5100242.733 | 7214297.582 |
| Hooded Crane | -4855607.02  | 6955999.166 |
| Hooded Crane | -5103054.664 | 7215612.738 |
| Hooded Crane | -5103027.947 | 7215536.38  |
| Hooded Crane | -5099552.552 | 7209624.755 |
| Hooded Crane | -5019188.786 | 7270495.374 |
| Hooded Crane | -5101865.771 | 7213060.89  |
| Hooded Crane | -4814225.113 | 6734508.713 |
| Hooded Crane | -5100269.45  | 7214253.684 |
| Hooded Crane | -5103346.321 | 7215549.743 |
| Hooded Crane | -5101396.003 | 7213141.04  |
| Hooded Crane | -4814254.056 | 6734650.628 |
| Hooded Crane | -5094471.931 | 7220518.375 |
| Hooded Crane | -5093389.905 | 7223055.471 |
| Hooded Crane | -5074964.303 | 7240353.823 |
| Hooded Crane | -4812138.986 | 6735299.157 |
| Hooded Crane | -4812619.886 | 6736188.5   |
| Hooded Crane | -5092330.144 | 7220262.418 |
| Hooded Crane | -4812154.57  | 6737092.316 |
| Hooded Crane | -5101529.587 | 7213509.359 |
| Hooded Crane | -4813748.665 | 6734460.211 |
| Hooded Crane | -4812063.288 | 6735892.041 |
| Hooded Crane | -4813105.239 | 6734803.324 |
| Hooded Crane | -4809854.71  | 6737024.032 |
| Hooded Crane | -5100705.822 | 7214156.345 |
| Hooded Crane | -5097125.788 | 7217854.167 |
| Hooded Crane | -4856317.239 | 6954398.074 |
| Hooded Crane | -5097134.693 | 7217880.901 |
| Hooded Crane | -4963324.212 | 7249359.669 |
| Hooded Crane | -5100445.335 | 7209157.436 |
| Hooded Crane | -5102090.637 | 7214698.405 |
| Hooded Crane | -5100966.31  | 7212814.72  |
| Hooded Crane | -4812161.249 | 6737049.189 |
| Hooded Crane | -5103393.075 | 7215553.561 |
| Hooded Crane | -5103399.754 | 7215557.378 |
| Hooded Crane | -4812720.073 | 6736916.217 |
| Hooded Crane | -5101689.887 | 7212454.066 |
| Hooded Crane | -4814365.375 | 6734772.785 |
| Hooded Crane | -4810847.679 | 6737185.758 |
| Hooded Crane | -4812156.797 | 6737052.783 |
| Hooded Crane | -5103304.019 | 7215545.925 |
| Hooded Crane | -5101102.12  | 7214293.765 |
| Hooded Crane | -5098172.191 | 7222547.221 |
| Hooded Crane | -5101598.605 | 7213478.824 |
| Hooded Crane | -4812136.759 | 6737068.956 |
| Hooded Crane | -5102722.932 | 7212440.709 |
| Hooded Crane | -5099746.248 | 7209399.675 |
| Hooded Crane | -4812134.533 | 6737059.971 |
| Hooded Crane | -5099118.406 | 7210223.728 |
| Hooded Crane | -5103261.718 | 7215204.233 |
| Hooded Crane | -4814222.886 | 6734541.048 |
| Hooded Crane | -4812141.212 | 6737108.489 |
| Hooded Crane | -5101856.866 | 7212452.158 |

|              |              |             |
|--------------|--------------|-------------|
| Hooded Crane | -5101910.299 | 7213169.665 |
| Hooded Crane | -4812143.438 | 6737081.534 |
| Hooded Crane | -5097121.335 | 7217842.71  |
| Hooded Crane | -5101896.941 | 7213028.448 |
| Hooded Crane | -4813443.65  | 6734580.568 |
| Hooded Crane | -4812259.211 | 6736689.809 |
| Hooded Crane | -5100376.317 | 7212278.516 |
| Hooded Crane | -4812156.797 | 6737077.94  |
| Hooded Crane | -4810887.754 | 6737140.834 |
| Hooded Crane | -5104573.061 | 7213015.09  |
| Hooded Crane | -5103488.81  | 7215091.612 |
| Hooded Crane | -5094458.573 | 7220522.195 |
| Hooded Crane | -4856433.011 | 6956486.76  |
| Hooded Crane | -4812159.023 | 6737074.346 |
| Hooded Crane | -4812152.344 | 6737074.346 |
| Hooded Crane | -5101678.755 | 7212717.399 |
| Hooded Crane | -5100251.639 | 7214303.308 |
| Hooded Crane | -5100984.121 | 7212818.536 |
| Hooded Crane | -5100993.027 | 7212812.812 |
| Hooded Crane | -5103032.4   | 7215626.1   |
| Hooded Crane | -5101242.382 | 7214929.364 |
| Hooded Crane | -4812679.998 | 6736973.718 |
| Hooded Crane | -5101812.338 | 7212450.25  |
| Hooded Crane | -5103344.094 | 7215534.471 |
| Hooded Crane | -4812152.344 | 6737067.159 |
| Hooded Crane | -5099158.481 | 7213057.073 |
| Hooded Crane | -4812132.306 | 6737076.143 |
| Hooded Crane | -5098837.881 | 7213480.733 |
| Hooded Crane | -5099870.926 | 7209712.5   |
| Hooded Crane | -4813949.04  | 6734781.767 |
| Hooded Crane | -4810364.553 | 6736226.231 |
| Hooded Crane | -4810769.756 | 6736959.343 |
| Hooded Crane | -5100828.274 | 7213944.494 |
| Hooded Crane | -4810878.849 | 6737165.991 |
| Hooded Crane | -4811802.801 | 6737660.173 |
| Hooded Crane | -5100289.487 | 7214312.851 |
| Hooded Crane | -5100240.507 | 7214372.019 |
| Hooded Crane | -5101004.159 | 7213751.734 |
| Hooded Crane | -4856457.501 | 6956294.674 |
| Hooded Crane | -4812136.759 | 6737067.159 |
| Hooded Crane | -4964237.032 | 7251691.392 |
| Hooded Crane | -5099532.515 | 7211177.601 |
| Hooded Crane | -4812484.076 | 6735951.332 |
| Hooded Crane | -5018574.302 | 7269293.922 |
| Hooded Crane | -4812221.362 | 6735755.494 |
| Hooded Crane | -4811036.923 | 6736682.621 |
| Hooded Crane | -5102377.841 | 7212265.159 |
| Hooded Crane | -5101073.177 | 7212891.051 |
| Hooded Crane | -4811934.158 | 6735484.204 |
| Hooded Crane | -4811063.639 | 6736608.95  |
| Hooded Crane | -4812005.402 | 6735421.324 |
| Hooded Crane | -5020642.618 | 7274797.136 |
| Hooded Crane | -5102072.826 | 7212524.669 |
| Hooded Crane | -5099995.604 | 7209941.404 |
| Hooded Crane | -4812726.752 | 6736926.998 |
| Hooded Crane | -5095896.82  | 7225801.739 |
| Hooded Crane | -4813287.803 | 6735119.504 |
| Hooded Crane | -4810858.811 | 6736680.824 |

|              |              |             |
|--------------|--------------|-------------|
| Hooded Crane | -5100935.14  | 7214675.5   |
| Hooded Crane | -4812145.665 | 6737090.519 |
| Hooded Crane | -5102139.617 | 7215082.068 |
| Hooded Crane | -5093418.848 | 7223345.914 |
| Hooded Crane | -5101712.151 | 7212602.905 |
| Hooded Crane | -4812150.117 | 6737079.737 |
| Hooded Crane | -4812136.759 | 6737063.565 |
| Hooded Crane | -5103749.297 | 7213400.579 |
| Hooded Crane | -4813312.293 | 6735117.707 |
| Hooded Crane | -5102079.505 | 7215299.676 |
| Hooded Crane | -4813396.896 | 6734420.691 |
| Hooded Crane | -5101921.431 | 7212316.679 |
| Hooded Crane | -4856332.823 | 6956466.443 |
| Hooded Crane | -5096268.627 | 7220115.343 |
| Hooded Crane | -5100296.167 | 7214337.664 |
| Hooded Crane | -5101620.869 | 7213278.442 |
| Hooded Crane | -5103475.451 | 7213558.979 |
| Hooded Crane | -5102317.729 | 7206089.084 |
| Hooded Crane | -5015795.768 | 7272439.236 |
| Hooded Crane | -5103353     | 7215536.38  |
| Hooded Crane | -5101037.554 | 7214221.238 |
| Hooded Crane | -4812757.922 | 6735168.01  |
| Hooded Crane | -4812179.061 | 6737067.159 |
| Hooded Crane | -4811310.769 | 6737176.773 |
| Hooded Crane | -5100997.479 | 7212808.995 |
| Hooded Crane | -4812147.891 | 6737076.143 |
| Hooded Crane | -4810642.852 | 6737241.464 |
| Hooded Crane | -5101485.059 | 7213266.992 |
| Hooded Crane | -5106850.658 | 7212263.251 |
| Hooded Crane | -5100273.903 | 7214265.136 |
| Hooded Crane | -5101665.396 | 7213276.534 |
| Hooded Crane | -4812150.117 | 6737086.925 |
| Hooded Crane | -4814220.66  | 6734524.88  |
| Hooded Crane | -5097125.788 | 7217865.624 |
| Hooded Crane | -5099939.944 | 7211961.772 |
| Hooded Crane | -4812415.058 | 6736432.861 |
| Hooded Crane | -5103181.568 | 7215196.598 |
| Hooded Crane | -5099799.682 | 7211954.14  |
| Hooded Crane | -5101090.988 | 7208079.847 |
| Hooded Crane | -5103662.468 | 7215215.686 |
| Hooded Crane | -4809609.807 | 6737600.87  |
| Hooded Crane | -5022679.765 | 7271818.147 |
| Hooded Crane | -4813049.579 | 6734841.049 |
| Hooded Crane | -5101142.195 | 7214100.996 |
| Hooded Crane | -4812773.507 | 6736935.983 |
| Hooded Crane | -5100311.751 | 7214293.765 |
| Hooded Crane | -4812138.986 | 6737049.189 |
| Hooded Crane | -4810139.687 | 6737595.478 |
| Hooded Crane | -4816449.276 | 6737164.194 |
| Hooded Crane | -5100247.186 | 7214244.141 |
| Hooded Crane | -4812132.306 | 6737065.362 |
| Hooded Crane | -5100630.125 | 7214083.819 |
| Hooded Crane | -4812152.344 | 6737081.534 |
| Hooded Crane | -4813036.221 | 6734927.279 |
| Hooded Crane | -4814202.849 | 6734735.06  |
| Hooded Crane | -4856277.164 | 6956289.133 |
| Hooded Crane | -4812141.212 | 6737085.128 |
| Hooded Crane | -5101583.02  | 7213448.289 |

|              |              |             |
|--------------|--------------|-------------|
| Hooded Crane | -5100113.603 | 7211578.263 |
| Hooded Crane | -4812715.62  | 6736934.186 |
| Hooded Crane | -4813321.199 | 6735117.707 |
| Hooded Crane | -5101709.924 | 7212709.766 |
| Hooded Crane | -4810609.456 | 6737255.84  |
| Hooded Crane | -5100347.374 | 7207919.652 |
| Hooded Crane | -5093365.415 | 7221303.487 |
| Hooded Crane | -5015844.748 | 7271199.03  |
| Hooded Crane | -5099619.344 | 7211139.444 |
| Hooded Crane | -5103515.526 | 7213923.5   |
| Hooded Crane | -5100060.169 | 7211767.153 |
| Hooded Crane | -4812130.08  | 6736878.481 |
| Hooded Crane | -5016630.664 | 7272070.038 |
| Hooded Crane | -4818660.081 | 6741708.213 |
| Hooded Crane | -4814225.113 | 6734532.066 |
| Hooded Crane | -4813303.387 | 6735121.3   |
| Hooded Crane | -4964800.309 | 7252849.843 |
| Hooded Crane | -5099879.832 | 7211784.325 |
| Hooded Crane | -4812706.715 | 6735354.85  |
| Hooded Crane | -5101683.207 | 7212866.243 |
| Hooded Crane | -5093133.871 | 7222701.986 |
| Hooded Crane | -4812159.023 | 6737083.331 |
| Hooded Crane | -4855595.888 | 6956366.706 |
| Hooded Crane | -5100970.763 | 7212828.078 |
| Hooded Crane | -4812147.891 | 6737050.986 |
| Hooded Crane | -5100972.989 | 7212841.436 |
| Hooded Crane | -4812152.344 | 6737079.737 |
| Hooded Crane | -4963355.382 | 7249305.986 |
| Hooded Crane | -4814251.829 | 6734776.377 |
| Hooded Crane | -5097123.561 | 7217863.715 |
| Hooded Crane | -5101678.755 | 7213278.442 |
| Hooded Crane | -5101195.628 | 7214944.634 |
| Hooded Crane | -5101549.624 | 7213509.359 |
| Hooded Crane | -4812829.166 | 6735076.388 |
| Hooded Crane | -4810219.838 | 6737564.928 |
| Hooded Crane | -5093815.146 | 7223496.873 |
| Hooded Crane | -5099875.379 | 7210347.725 |
| Hooded Crane | -5101193.402 | 7214919.82  |
| Hooded Crane | -5099764.059 | 7209407.305 |
| Hooded Crane | -5101538.492 | 7213513.176 |
| Hooded Crane | -5102431.274 | 7212616.263 |
| Hooded Crane | -4855529.097 | 6956344.542 |
| Hooded Crane | -4814269.641 | 6734727.874 |
| Hooded Crane | -4814643.674 | 6734690.149 |
| Hooded Crane | -4812136.759 | 6736921.607 |
| Hooded Crane | -4856323.918 | 6956483.066 |
| Hooded Crane | -5101075.403 | 7214301.4   |
| Hooded Crane | -4812152.344 | 6737067.159 |
| Hooded Crane | -4812165.702 | 6737059.971 |
| Hooded Crane | -5101418.267 | 7212944.483 |
| Hooded Crane | -5093447.792 | 7223173.94  |
| Hooded Crane | -4814238.471 | 6734850.032 |
| Hooded Crane | -5020829.635 | 7272610.381 |
| Hooded Crane | -5097303.899 | 7217970.648 |
| Hooded Crane | -5093563.564 | 7223515.981 |
| Hooded Crane | -5101525.134 | 7213337.602 |
| Hooded Crane | -5101099.893 | 7214288.039 |
| Hooded Crane | -5101493.964 | 7215072.524 |

|              |              |             |
|--------------|--------------|-------------|
| Hooded Crane | -4812535.283 | 6736008.827 |
| Hooded Crane | -5100305.072 | 7214297.582 |
| Hooded Crane | -5101567.435 | 7213125.773 |
| Hooded Crane | -5101059.818 | 7214650.687 |
| Hooded Crane | -5100932.914 | 7213734.558 |
| Hooded Crane | -5100716.954 | 7214217.42  |
| Hooded Crane | -4812132.306 | 6737081.534 |
| Hooded Crane | -4811965.327 | 6735798.614 |
| Hooded Crane | -4963355.382 | 7249380.758 |
| Hooded Crane | -5100298.393 | 7214280.405 |
| Hooded Crane | -5101551.85  | 7212732.665 |
| Hooded Crane | -4812212.456 | 6735812.987 |
| Hooded Crane | -5099668.325 | 7210109.271 |
| Hooded Crane | -5102139.617 | 7212768.922 |
| Hooded Crane | -5101903.62  | 7212934.941 |
| Hooded Crane | -5014373.104 | 7283819.926 |
| Hooded Crane | -5100405.26  | 7208127.525 |
| Hooded Crane | -4814231.792 | 6734521.288 |
| Hooded Crane | -4812147.891 | 6737047.392 |
| Hooded Crane | -5099327.687 | 7212272.792 |
| Hooded Crane | -4858456.799 | 6956549.558 |
| Hooded Crane | -5100895.065 | 7213839.525 |
| Hooded Crane | -4816393.616 | 6734936.262 |
| Hooded Crane | -5100979.668 | 7212906.317 |
| Hooded Crane | -5100260.544 | 7214284.222 |
| Hooded Crane | -5097123.561 | 7217867.534 |
| Hooded Crane | -4855620.379 | 6956001.013 |
| Hooded Crane | -4875504.266 | 6968580.935 |
| Hooded Crane | -5099804.134 | 7209434.009 |
| Hooded Crane | -5099338.819 | 7210124.532 |
| Hooded Crane | -5101663.17  | 7213246     |
| Hooded Crane | -4810856.585 | 6737169.585 |
| Hooded Crane | -5099536.968 | 7211204.311 |
| Hooded Crane | -5101113.252 | 7214165.888 |
| Hooded Crane | -4812292.606 | 6735768.071 |
| Hooded Crane | -5100269.45  | 7214301.4   |
| Hooded Crane | -5103727.033 | 7215398.938 |
| Hooded Crane | -4812548.641 | 6736042.964 |
| Hooded Crane | -5017712.689 | 7272629.611 |
| Hooded Crane | -5100964.084 | 7212763.197 |
| Hooded Crane | -5101053.139 | 7212797.546 |
| Hooded Crane | -5017131.601 | 7275420.387 |
| Hooded Crane | -5100986.347 | 7212797.546 |
| Hooded Crane | -5102295.465 | 7215269.134 |
| Hooded Crane | -4812132.306 | 6737063.565 |
| Hooded Crane | -4810874.396 | 6736414.893 |
| Hooded Crane | -5018019.931 | 7271525.887 |
| Hooded Crane | -4812686.677 | 6735176.993 |
| Hooded Crane | -5096972.167 | 7223061.203 |
| Hooded Crane | -5100247.186 | 7208302.981 |
| Hooded Crane | -5103350.773 | 7214774.754 |
| Hooded Crane | -4856348.408 | 6956723.18  |
| Hooded Crane | -5101088.761 | 7214289.948 |
| Hooded Crane | -5097130.24  | 7217859.896 |
| Hooded Crane | -5100262.771 | 7214282.313 |
| Hooded Crane | -4812401.7   | 6737088.722 |
| Hooded Crane | -4810482.552 | 6737588.29  |
| Hooded Crane | -5099815.266 | 7211793.865 |



|              |              |             |
|--------------|--------------|-------------|
| Hooded Crane | -5100285.035 | 7214333.846 |
| Hooded Crane | -4964539.821 | 7252600.493 |
| Hooded Crane | -5100244.96  | 7214299.491 |
| Hooded Crane | -4812141.212 | 6737033.017 |
| Hooded Crane | -4812161.249 | 6735728.545 |
| Hooded Crane | -5100964.084 | 7212816.628 |
| Hooded Crane | -5101077.629 | 7214284.222 |
| Hooded Crane | -4812165.702 | 6737083.331 |
| Hooded Crane | -4856337.276 | 6956471.984 |
| Hooded Crane | -5100739.218 | 7213976.94  |
| Hooded Crane | -5103548.922 | 7214387.288 |
| Hooded Crane | -5100378.543 | 7208718.753 |
| Hooded Crane | -5100950.725 | 7213740.283 |
| Hooded Crane | -5099695.041 | 7210158.869 |
| Hooded Crane | -5092559.462 | 7220955.812 |
| Hooded Crane | -5104288.084 | 7215070.615 |
| Hooded Crane | -5101721.056 | 7213165.848 |
| Hooded Crane | -5102081.731 | 7215286.314 |
| Hooded Crane | -5093187.304 | 7223330.627 |
| Hooded Crane | -4810858.811 | 6737151.616 |
| Hooded Crane | -4875047.856 | 6968752.971 |
| Hooded Crane | -5100986.347 | 7212786.096 |
| Hooded Crane | -5102010.487 | 7212383.464 |
| Hooded Crane | -5101921.431 | 7212923.492 |
| Hooded Crane | -4811931.931 | 6735462.645 |
| Hooded Crane | -4814140.51  | 6734823.085 |
| Hooded Crane | -5100454.24  | 7214121.991 |
| Hooded Crane | -5100285.035 | 7214274.679 |
| Hooded Crane | -5075011.057 | 7240367.228 |
| Hooded Crane | -4855546.908 | 6956049.032 |
| Hooded Crane | -4812130.08  | 6737076.143 |
| Hooded Crane | -5101070.95  | 7214265.136 |
| Hooded Crane | -4811940.837 | 6735514.746 |
| Hooded Crane | -4812374.983 | 6736238.809 |
| Hooded Crane | -5101872.451 | 7212917.767 |
| Hooded Crane | -5093425.528 | 7223210.245 |
| Hooded Crane | -4856179.202 | 6956494.148 |
| Hooded Crane | -5096268.627 | 7220082.872 |
| Hooded Crane | -5100846.085 | 7214072.368 |
| Hooded Crane | -4814641.448 | 6734731.467 |
| Hooded Crane | -5103680.279 | 7215471.477 |
| Hooded Crane | -5099648.287 | 7209561.808 |
| Hooded Crane | -4814104.888 | 6734819.492 |
| Hooded Crane | -5101001.932 | 7214797.659 |
| Hooded Crane | -4812147.891 | 6737077.94  |
| Hooded Crane | -5102925.533 | 7215666.189 |
| Hooded Crane | -4856339.503 | 6956708.404 |
| Hooded Crane | -4812123.401 | 6737079.737 |
| Hooded Crane | -4812154.57  | 6737077.94  |
| Hooded Crane | -4812136.759 | 6737077.94  |
| Hooded Crane | -4814311.942 | 6734781.767 |
| Hooded Crane | -5101770.037 | 7212591.456 |
| Hooded Crane | -5100970.763 | 7212837.619 |
| Hooded Crane | -5097125.788 | 7217863.715 |
| Hooded Crane | -4812156.797 | 6737076.143 |
| Hooded Crane | -5103531.111 | 7213505.542 |
| Hooded Crane | -4855239.666 | 6955844.029 |
| Hooded Crane | -4812161.249 | 6737059.971 |

|              |              |             |
|--------------|--------------|-------------|
| Hooded Crane | -4812156.797 | 6737054.58  |
| Hooded Crane | -5016632.89  | 7271973.896 |
| Hooded Crane | -5093385.453 | 7223240.818 |
| Hooded Crane | -4812130.08  | 6737058.174 |
| Hooded Crane | -4812143.438 | 6737061.768 |
| Hooded Crane | -5097128.014 | 7217856.077 |
| Hooded Crane | -5100752.577 | 7214093.362 |
| Hooded Crane | -4873774.361 | 6966735.024 |
| Hooded Crane | -4812234.72  | 6735868.684 |
| Hooded Crane | -4810233.196 | 6737577.508 |
| Hooded Crane | -5100302.846 | 7214272.77  |
| Hooded Crane | -5097145.825 | 7217808.34  |
| Hooded Crane | -5099692.815 | 7209117.381 |
| Hooded Crane | -4855533.549 | 6956346.389 |
| Hooded Crane | -4855604.794 | 6955993.625 |
| Hooded Crane | -5101028.649 | 7214165.888 |
| Hooded Crane | -5099572.59  | 7211045.96  |
| Hooded Crane | -5101090.988 | 7214205.969 |
| Hooded Crane | -4812145.665 | 6737065.362 |
| Hooded Crane | -5097136.919 | 7217865.624 |
| Hooded Crane | -5101269.099 | 7214568.612 |
| Hooded Crane | -5099601.533 | 7211648.858 |
| Hooded Crane | -5097119.108 | 7217848.439 |
| Hooded Crane | -5100289.487 | 7214267.044 |
| Hooded Crane | -5016708.587 | 7272006.584 |
| Hooded Crane | -4814296.357 | 6734609.311 |
| Hooded Crane | -5101665.396 | 7213307.068 |
| Hooded Crane | -5099866.473 | 7210349.632 |
| Hooded Crane | -5097266.05  | 7217951.553 |
| Hooded Crane | -5101896.941 | 7213020.815 |
| Hooded Crane | -5100986.347 | 7212778.463 |
| Hooded Crane | -5101925.884 | 7212656.336 |
| Hooded Crane | -5103426.471 | 7215108.791 |
| Hooded Crane | -5104089.935 | 7215502.02  |
| Hooded Crane | -5099772.965 | 7209334.823 |
| Hooded Crane | -4812138.986 | 6737052.783 |
| Hooded Crane | -4810642.852 | 6737266.622 |
| Hooded Crane | -4856337.276 | 6956473.831 |
| Hooded Crane | -4856328.371 | 6956479.372 |
| Hooded Crane | -5093349.83  | 7221309.218 |
| Hooded Crane | -5101079.856 | 7214276.588 |
| Hooded Crane | -5102956.702 | 7215649.008 |
| Hooded Crane | -5100636.804 | 7214566.704 |
| Hooded Crane | -4813274.444 | 6734483.564 |
| Hooded Crane | -5094500.874 | 7220522.195 |
| Hooded Crane | -5101894.715 | 7213058.982 |
| Hooded Crane | -5101574.114 | 7213499.817 |
| Hooded Crane | -5101447.21  | 7212996.007 |
| Hooded Crane | -4827585.678 | 7132479.542 |
| Hooded Crane | -5100975.216 | 7212799.454 |
| Hooded Crane | -4812145.665 | 6737077.94  |
| Hooded Crane | -5103397.528 | 7214809.111 |
| Hooded Crane | -5100278.355 | 7214274.679 |
| Hooded Crane | -5100808.236 | 7214870.192 |
| Hooded Crane | -4812292.606 | 6735714.171 |
| Hooded Crane | -4810215.385 | 6737584.696 |
| Hooded Crane | -5101834.602 | 7212389.189 |
| Hooded Crane | -4818668.987 | 6741672.254 |

|              |              |             |
|--------------|--------------|-------------|
| Hooded Crane | -4812170.155 | 6737113.879 |
| Hooded Crane | -4812415.058 | 6737288.186 |
| Hooded Crane | -4812121.174 | 6737081.534 |
| Hooded Crane | -4812163.476 | 6735750.104 |
| Hooded Crane | -5091782.452 | 7219599.645 |
| Hooded Crane | -4814122.699 | 6734907.518 |
| Hooded Crane | -5093407.717 | 7223066.936 |
| Hooded Crane | -4812159.023 | 6737088.722 |
| Hooded Crane | -5100857.217 | 7213925.409 |
| Hooded Crane | -4812098.911 | 6737052.783 |
| Hooded Crane | -5097145.825 | 7217812.159 |
| Hooded Crane | -4855549.134 | 6956050.879 |
| Hooded Crane | -5101585.246 | 7214811.02  |
| Hooded Crane | -4812145.665 | 6737079.737 |
| Hooded Crane | -5099764.059 | 7209163.158 |
| Hooded Crane | -4811123.752 | 6736689.809 |
| Hooded Crane | -5100736.992 | 7214095.271 |
| Hooded Crane | -5101039.781 | 7212784.188 |
| Hooded Crane | -4812125.627 | 6737052.783 |
| Hooded Crane | -5101465.021 | 7213345.235 |
| Hooded Crane | -4856101.279 | 6956363.012 |
| Hooded Crane | -4812141.212 | 6737079.737 |
| Hooded Crane | -5099708.4   | 7209687.702 |
| Hooded Crane | -4812637.697 | 6736930.592 |
| Hooded Crane | -5100282.808 | 7214270.862 |
| Hooded Crane | -4809966.029 | 6737505.626 |
| Hooded Crane | -5103702.543 | 7215586.013 |
| Hooded Crane | -5100993.027 | 7214184.974 |
| Hooded Crane | -5097357.332 | 7217869.443 |
| Hooded Crane | -4812771.28  | 6736851.528 |
| Hooded Crane | -5103257.265 | 7215385.576 |
| Hooded Crane | -4856343.955 | 6956710.251 |
| Hooded Crane | -5099554.779 | 7211236.745 |
| Hooded Crane | -5100639.031 | 7214038.013 |
| Hooded Crane | -5023456.775 | 7269707.2   |
| Hooded Crane | -5100334.015 | 7212265.159 |
| Hooded Crane | -5101082.082 | 7214280.405 |
| Hooded Crane | -4812092.231 | 6736988.093 |
| Hooded Crane | -5103074.701 | 7211547.735 |
| Hooded Crane | -5103317.378 | 7215507.746 |
| Hooded Crane | -5101166.685 | 7213591.422 |
| Hooded Crane | -5100111.376 | 7211721.361 |
| Hooded Crane | -5099156.255 | 7210177.945 |
| Hooded Crane | -4814242.924 | 6734548.233 |
| Hooded Crane | -5099467.95  | 7212076.257 |
| Hooded Crane | -5101896.941 | 7213030.357 |
| Hooded Crane | -5102660.593 | 7212412.087 |
| Hooded Crane | -5091789.131 | 7219605.375 |
| Hooded Crane | -5093418.848 | 7223345.914 |
| Hooded Crane | -4812141.212 | 6737076.143 |
| Hooded Crane | -5100142.546 | 7211545.828 |
| Hooded Crane | -5086599.416 | 7221863.238 |
| Hooded Crane | -5101536.266 | 7213545.619 |
| Hooded Crane | -5100968.536 | 7212826.17  |
| Hooded Crane | -5100981.895 | 7212826.17  |
| Hooded Crane | -5097132.467 | 7217863.715 |
| Hooded Crane | -4812996.146 | 6734923.686 |
| Hooded Crane | -4812143.438 | 6737074.346 |

|              |              |             |
|--------------|--------------|-------------|
| Hooded Crane | -5103355.226 | 7215553.561 |
| Hooded Crane | -4812156.797 | 6737042.001 |
| Hooded Crane | -5097130.24  | 7217861.805 |
| Hooded Crane | -4812143.438 | 6737054.58  |
| Hooded Crane | -5102798.629 | 7215475.295 |
| Hooded Crane | -5093140.55  | 7222875.86  |
| Hooded Crane | -4814340.885 | 6734641.646 |
| Hooded Crane | -4856328.371 | 6956488.607 |
| Hooded Crane | -4965437.056 | 7252556.378 |
| Hooded Crane | -4812147.891 | 6737085.128 |
| Hooded Crane | -5100260.544 | 7214270.862 |
| Hooded Crane | -4810542.664 | 6737530.784 |
| Hooded Crane | -5100280.582 | 7214270.862 |
| Hooded Crane | -5102763.007 | 7215853.269 |
| Hooded Crane | -5102077.278 | 7215297.767 |
| Hooded Crane | -4812114.495 | 6737031.22  |
| Hooded Crane | -4812172.381 | 6737065.362 |
| Hooded Crane | -5020698.278 | 7273875.816 |
| Hooded Crane | -5100365.185 | 7212051.452 |
| Hooded Crane | -5101663.17  | 7213286.075 |
| Hooded Crane | -5093830.731 | 7223491.14  |
| Hooded Crane | -5100260.544 | 7214293.765 |
| Hooded Crane | -5101204.534 | 7213686.846 |
| Hooded Crane | -5099868.7   | 7210342.002 |
| Hooded Crane | -5018042.195 | 7272112.341 |
| Hooded Crane | -5102139.617 | 7215085.885 |
| Hooded Crane | -5097156.957 | 7217815.978 |
| Hooded Crane | -5097132.467 | 7217865.624 |
| Hooded Crane | -5100282.808 | 7214282.313 |
| Hooded Crane | -5101449.437 | 7213446.381 |
| Hooded Crane | -5100325.11  | 7212247.986 |
| Hooded Crane | -4810255.46  | 6737575.711 |
| Hooded Crane | -5097121.335 | 7217861.805 |
| Hooded Crane | -5099154.029 | 7213301.343 |
| Hooded Crane | -5100285.035 | 7214280.405 |
| Hooded Crane | -4812789.091 | 6735493.187 |
| Hooded Crane | -4813586.139 | 6734612.903 |
| Hooded Crane | -4964544.274 | 7252592.821 |
| Hooded Crane | -4812161.249 | 6737070.753 |
| Hooded Crane | -5100251.639 | 7214276.588 |
| Hooded Crane | -5100995.253 | 7212829.986 |
| Hooded Crane | -5101567.435 | 7213282.259 |
| Hooded Crane | -5099777.418 | 7211837.75  |
| Hooded Crane | -4812595.395 | 6736914.42  |
| Hooded Crane | -5101529.587 | 7212747.931 |
| Hooded Crane | -5100837.179 | 7214068.55  |
| Hooded Crane | -5101166.685 | 7215152.694 |
| Hooded Crane | -4856326.144 | 6956704.709 |
| Hooded Crane | -4812152.344 | 6737090.519 |
| Hooded Crane | -5100129.187 | 7209691.517 |
| Hooded Crane | -5098980.37  | 7213081.881 |
| Hooded Crane | -5097125.788 | 7217861.805 |
| Hooded Crane | -5100966.31  | 7214627.782 |
| Hooded Crane | -5099151.802 | 7213333.785 |
| Hooded Crane | -5100269.45  | 7214309.034 |
| Hooded Crane | -5100968.536 | 7214393.014 |
| Hooded Crane | -5099272.027 | 7212398.729 |
| Hooded Crane | -5101126.61  | 7215076.341 |

|              |              |             |
|--------------|--------------|-------------|
| Hooded Crane | -5097116.882 | 7217856.077 |
| Hooded Crane | -4812138.986 | 6737072.55  |
| Hooded Crane | -5101160.006 | 7214807.203 |
| Hooded Crane | -4966080.483 | 7251986.742 |
| Hooded Crane | -4812147.891 | 6737085.128 |
| Hooded Crane | -4812688.904 | 6736966.53  |
| Hooded Crane | -5101042.007 | 7214606.786 |
| Hooded Crane | -5093527.942 | 7223454.833 |
| Hooded Crane | -5101756.678 | 7212646.794 |
| Hooded Crane | -5101195.628 | 7214933.181 |
| Hooded Crane | -4813040.673 | 6734914.704 |
| Hooded Crane | -5100313.978 | 7212255.619 |
| Hooded Crane | -4814165     | 6735345.868 |
| Hooded Crane | -5101393.777 | 7212999.824 |
| Hooded Crane | -5096190.704 | 7221641.626 |
| Hooded Crane | -4812130.08  | 6737067.159 |
| Hooded Crane | -4810627.267 | 6737230.683 |
| Hooded Crane | -5103241.68  | 7215545.925 |
| Hooded Crane | -4812147.891 | 6737088.722 |
| Hooded Crane | -5099138.444 | 7210187.483 |
| Hooded Crane | -5097123.561 | 7217857.986 |
| Hooded Crane | -4964562.085 | 7252673.379 |
| Hooded Crane | -4812826.94  | 6735069.202 |
| Hooded Crane | -5100289.487 | 7214282.313 |
| Hooded Crane | -5106100.365 | 7214066.642 |
| Hooded Crane | -5100305.072 | 7214289.948 |
| Hooded Crane | -5101070.95  | 7212807.087 |
| Hooded Crane | -4812121.174 | 6735827.361 |
| Hooded Crane | -4812651.055 | 6734943.448 |
| Hooded Crane | -4855246.345 | 6955238.283 |
| Hooded Crane | -5101073.177 | 7214272.77  |
| Hooded Crane | -5097134.693 | 7217854.167 |
| Hooded Crane | -4964542.048 | 7252596.657 |
| Hooded Crane | -4812145.665 | 6737074.346 |
| Hooded Crane | -4812150.117 | 6737065.362 |
| Hooded Crane | -5101215.666 | 7214524.712 |
| Hooded Crane | -4855322.042 | 6956431.35  |
| Hooded Crane | -4875047.856 | 6968754.821 |
| Hooded Crane | -4875497.587 | 6968579.086 |
| Hooded Crane | -5100988.574 | 7212801.362 |
| Hooded Crane | -5101102.12  | 7214494.174 |
| Hooded Crane | -4812136.759 | 6737070.753 |
| Hooded Crane | -5100293.94  | 7208329.682 |
| Hooded Crane | -5100267.224 | 7214270.862 |
| Hooded Crane | -4812154.57  | 6737038.408 |
| Hooded Crane | -4812014.308 | 6735353.054 |
| Hooded Crane | -4812392.794 | 6736174.126 |
| Hooded Crane | -4813312.293 | 6735128.486 |
| Hooded Crane | -4812103.363 | 6737072.55  |
| Hooded Crane | -4856339.503 | 6956708.404 |
| Hooded Crane | -5100264.997 | 7214293.765 |
| Hooded Crane | -5099534.741 | 7210906.689 |
| Hooded Crane | -5097134.693 | 7217863.715 |
| Hooded Crane | -5103704.769 | 7211469.51  |
| Hooded Crane | -5103174.889 | 7215179.418 |
| Hooded Crane | -5101678.755 | 7213301.343 |
| Hooded Crane | -5098978.144 | 7212919.675 |
| Hooded Crane | -4812161.249 | 6737090.519 |

|              |              |             |
|--------------|--------------|-------------|
| Hooded Crane | -5099681.683 | 7210055.858 |
| Hooded Crane | -4812076.647 | 6737077.94  |
| Hooded Crane | -4812172.381 | 6737085.128 |
| Hooded Crane | -5097134.693 | 7217831.254 |
| Hooded Crane | -4812535.283 | 6735999.843 |
| Hooded Crane | -4812145.665 | 6737056.377 |
| Hooded Crane | -5097141.372 | 7217815.978 |
| Hooded Crane | -4812815.808 | 6735035.068 |
| Hooded Crane | -5097128.014 | 7217842.71  |
| Hooded Crane | -5100924.009 | 7214667.865 |
| Hooded Crane | -5101754.452 | 7212751.747 |
| Hooded Crane | -5103317.378 | 7211370.298 |
| Hooded Crane | -5100264.997 | 7214291.857 |
| Hooded Crane | -5100305.072 | 7214341.481 |
| Hooded Crane | -4814325.3   | 6734702.724 |
| Hooded Crane | -4810885.528 | 6736682.621 |
| Hooded Crane | -4855529.097 | 6956348.236 |
| Hooded Crane | -5100750.35  | 7214087.636 |
| Hooded Crane | -5100977.442 | 7212816.628 |
| Hooded Crane | -5103346.321 | 7215549.743 |
| Hooded Crane | -5099873.153 | 7210345.817 |
| Hooded Crane | -4810992.395 | 6736997.078 |
| Hooded Crane | -5101099.893 | 7213589.514 |
| Hooded Crane | -5101471.7   | 7213328.06  |
| Hooded Crane | -5101689.887 | 7213352.869 |
| Hooded Crane | -5101010.838 | 7213417.755 |
| Hooded Crane | -4810190.894 | 6737537.973 |
| Hooded Crane | -5099726.211 | 7211950.324 |
| Hooded Crane | -5097159.183 | 7217857.986 |
| Hooded Crane | -5101531.813 | 7213513.176 |
| Hooded Crane | -5099917.68  | 7208829.375 |
| Hooded Crane | -5097125.788 | 7217850.348 |
| Hooded Crane | -5101108.799 | 7214267.044 |
| Hooded Crane | -5100267.224 | 7214278.496 |
| Hooded Crane | -5101050.913 | 7212789.913 |
| Hooded Crane | -5093812.919 | 7223491.14  |
| Hooded Crane | -5101763.358 | 7215349.307 |
| Hooded Crane | -5100273.903 | 7214244.141 |
| Hooded Crane | -5100260.544 | 7214291.857 |
| Hooded Crane | -4812152.344 | 6737072.55  |
| Hooded Crane | -4812121.174 | 6737049.189 |
| Hooded Crane | -4812143.438 | 6737056.377 |
| Hooded Crane | -5102072.826 | 7215292.041 |
| Hooded Crane | -4814287.452 | 6734645.239 |
| Hooded Crane | -4811954.195 | 6737554.146 |
| Hooded Crane | -4812165.702 | 6737079.737 |
| Hooded Crane | -5100262.771 | 7214301.4   |
| Hooded Crane | -5101981.544 | 7212667.785 |
| Hooded Crane | -5099550.326 | 7211440.891 |
| Hooded Crane | -4810208.706 | 6737564.928 |
| Hooded Crane | -4812775.733 | 6735011.714 |
| Hooded Crane | -5100743.671 | 7214120.082 |
| Hooded Crane | -4964542.048 | 7252588.985 |
| Hooded Crane | -4813831.042 | 6734666.796 |
| Hooded Crane | -5103159.304 | 7215196.598 |
| Hooded Crane | -5100273.903 | 7214270.862 |
| Hooded Crane | -5101262.42  | 7214692.678 |
| Hooded Crane | -5100008.962 | 7210162.684 |

|              |              |             |
|--------------|--------------|-------------|
| Hooded Crane | -4856326.144 | 6956471.984 |
| Hooded Crane | -4812167.929 | 6737067.159 |
| Hooded Crane | -4812150.117 | 6737086.925 |
| Hooded Crane | -5100262.771 | 7214289.948 |
| Hooded Crane | -4811945.29  | 6735430.307 |
| Hooded Crane | -5101019.743 | 7212776.555 |
| Hooded Crane | -5101761.131 | 7212599.089 |
| Hooded Crane | -4812167.929 | 6737068.956 |
| Hooded Crane | -5100238.28  | 7211503.853 |
| Hooded Crane | -5100080.207 | 7211908.347 |
| Hooded Crane | -5100280.582 | 7214274.679 |
| Hooded Crane | -4812150.117 | 6737095.91  |
| Hooded Crane | -5097132.467 | 7217869.443 |
| Hooded Crane | -5103368.585 | 7215551.652 |
| Hooded Crane | -5099641.608 | 7210746.436 |
| Hooded Crane | -5100133.64  | 7209760.188 |
| Hooded Crane | -4814325.3   | 6734654.221 |
| Hooded Crane | -5093271.907 | 7221177.405 |
| Hooded Crane | -5099672.777 | 7211313.061 |
| Hooded Crane | -5101716.603 | 7212562.833 |
| Hooded Crane | -4812156.797 | 6737063.565 |
| Hooded Crane | -5016590.589 | 7272087.344 |
| Hooded Crane | -5101039.781 | 7212786.096 |
| Hooded Crane | -5099145.123 | 7210187.483 |
| Hooded Crane | -5099111.727 | 7212788.004 |
| Hooded Crane | -5102139.617 | 7212639.162 |
| Hooded Crane | -5102702.894 | 7215649.008 |
| Hooded Crane | -5093334.246 | 7223122.348 |
| Hooded Crane | -4849455.505 | 6937645.714 |
| Hooded Crane | -4811996.497 | 6735415.934 |
| Hooded Crane | -4856508.708 | 6956353.777 |
| Hooded Crane | -5100002.283 | 7213761.277 |
| Hooded Crane | -5101068.724 | 7214274.679 |
| Hooded Crane | -4874117.225 | 6967328.702 |
| Hooded Crane | -5100921.782 | 7214278.496 |
| Hooded Crane | -5099207.462 | 7212393.005 |
| Hooded Crane | -4814242.924 | 6734557.215 |
| Hooded Crane | -5100340.694 | 7214289.948 |
| Hooded Crane | -5100968.536 | 7214150.619 |
| Hooded Crane | -5100282.808 | 7214270.862 |
| Hooded Crane | -5101999.355 | 7212400.638 |
| Hooded Crane | -5100739.218 | 7214089.545 |
| Hooded Crane | -4812303.738 | 6736114.833 |
| Hooded Crane | -5100282.808 | 7214270.862 |
| Hooded Crane | -5099975.566 | 7209754.465 |
| Hooded Crane | -5101632.001 | 7213364.319 |
| Hooded Crane | -4812150.117 | 6737056.377 |
| Hooded Crane | -5101937.016 | 7212856.702 |
| Hooded Crane | -5091219.175 | 7227401.787 |
| Hooded Crane | -4855524.644 | 6956348.236 |
| Hooded Crane | -5100946.272 | 7212797.546 |
| Hooded Crane | -4856330.597 | 6956479.372 |
| Hooded Crane | -5099672.777 | 7209996.723 |
| Hooded Crane | -5106198.326 | 7225966.126 |
| Hooded Crane | -5097125.788 | 7217856.077 |
| Hooded Crane | -4964539.821 | 7252600.493 |
| Hooded Crane | -5101638.68  | 7212765.105 |
| Hooded Crane | -5097121.335 | 7217859.896 |

|              |              |             |
|--------------|--------------|-------------|
| Hooded Crane | -5103304.019 | 7214152.528 |
| Hooded Crane | -5100287.261 | 7214257.501 |
| Hooded Crane | -5086603.869 | 7221851.776 |
| Hooded Crane | -5091775.773 | 7219588.186 |
| Hooded Crane | -4812161.249 | 6737065.362 |
| Hooded Crane | -5100968.536 | 7212801.362 |
| Hooded Crane | -5099815.266 | 7209344.36  |
| Hooded Crane | -5097128.014 | 7217857.986 |
| Hooded Crane | -5103212.737 | 7215612.738 |
| Hooded Crane | -5097119.108 | 7217859.896 |
| Hooded Crane | -4812150.117 | 6737088.722 |
| Hooded Crane | -5100256.092 | 7214240.324 |
| Hooded Crane | -4812619.886 | 6736132.801 |
| Hooded Crane | -4812154.57  | 6737077.94  |
| Hooded Crane | -5100979.668 | 7214677.409 |
| Hooded Crane | -5100895.065 | 7214148.711 |
| Hooded Crane | -5100260.544 | 7214263.227 |
| Hooded Crane | -5101580.794 | 7213440.656 |
| Hooded Crane | -4856341.729 | 6956708.404 |
| Hooded Crane | -5101104.346 | 7214505.626 |
| Hooded Crane | -5101482.832 | 7213370.045 |
| Hooded Crane | -5101772.263 | 7212671.601 |
| Hooded Crane | -5101734.414 | 7213249.816 |
| Hooded Crane | -5099405.611 | 7209954.757 |
| Hooded Crane | -5100975.216 | 7212831.894 |
| Hooded Crane | -4812152.344 | 6737067.159 |
| Hooded Crane | -4892988.105 | 6953011.46  |
| Hooded Crane | -5100260.544 | 7214274.679 |
| Hooded Crane | -4809872.521 | 6737480.467 |
| Hooded Crane | -5100264.997 | 7214265.136 |
| Hooded Crane | -4818252.652 | 6742127.154 |
| Hooded Crane | -4814282.999 | 6734754.82  |
| Hooded Crane | -5100814.915 | 7214141.077 |
| Hooded Crane | -4812165.702 | 6737133.646 |
| Hooded Crane | -5101030.875 | 7214454.091 |
| Hooded Crane | -5099946.623 | 7210387.786 |
| Hooded Crane | -4810865.491 | 6737446.323 |
| Hooded Crane | -5100993.027 | 7212822.353 |
| Hooded Crane | -5099875.379 | 7210343.91  |
| Hooded Crane | -4812379.436 | 6736181.313 |
| Hooded Crane | -5099939.944 | 7211744.257 |
| Hooded Crane | -4809591.996 | 6737604.464 |
| Hooded Crane | -4810562.702 | 6737379.834 |
| Hooded Crane | -4814303.036 | 6735654.882 |
| Hooded Crane | -5100583.371 | 7214662.139 |
| Hooded Crane | -4812145.665 | 6737086.925 |
| Hooded Crane | -5100320.657 | 7214343.39  |
| Hooded Crane | -5093830.731 | 7223481.585 |
| Hooded Crane | -5101115.478 | 7214215.512 |
| Hooded Crane | -4963337.571 | 7249373.089 |
| Hooded Crane | -4812132.306 | 6737050.986 |
| Hooded Crane | -4812130.08  | 6737063.565 |
| Hooded Crane | -4812136.759 | 6737067.159 |
| Hooded Crane | -4812150.117 | 6737054.58  |
| Hooded Crane | -4873843.379 | 6966368.852 |
| Hooded Crane | -5100146.998 | 7209487.418 |
| Hooded Crane | -5100338.468 | 7214186.883 |
| Hooded Crane | -4812174.608 | 6737115.676 |



|              |              |             |
|--------------|--------------|-------------|
| Hooded Crane | -4856341.729 | 6956710.251 |
| Hooded Crane | -5099603.759 | 7211030.697 |
| Hooded Crane | -4812161.249 | 6737065.362 |
| Hooded Crane | -5099922.133 | 7210092.103 |
| Hooded Crane | -5097128.014 | 7217846.529 |
| Hooded Crane | -5103201.605 | 7215150.786 |
| Hooded Crane | -5100336.242 | 7214309.034 |
| Hooded Crane | -4812145.665 | 6737068.956 |
| Hooded Crane | -5101001.932 | 7214696.496 |
| Hooded Crane | -5098911.352 | 7205465.645 |
| Hooded Crane | -5100979.668 | 7212912.042 |
| Hooded Crane | -5101763.358 | 7212637.253 |
| Hooded Crane | -5097121.335 | 7217857.986 |
| Hooded Crane | -5101803.433 | 7212749.839 |
| Hooded Crane | -5093336.472 | 7222990.505 |
| Hooded Crane | -5100977.442 | 7212812.812 |
| Hooded Crane | -5098975.917 | 7213068.523 |
| Hooded Crane | -4812477.397 | 6736244.199 |
| Hooded Crane | -5100594.503 | 7212015.198 |
| Hooded Crane | -5099280.933 | 7210162.684 |
| Hooded Crane | -5097123.561 | 7217854.167 |
| Hooded Crane | -5100242.733 | 7214146.802 |
| Hooded Crane | -5100273.903 | 7214274.679 |
| Hooded Crane | -4855520.191 | 6956357.471 |
| Hooded Crane | -4875043.403 | 6968743.722 |
| Hooded Crane | -4812141.212 | 6737056.377 |
| Hooded Crane | -5100975.216 | 7212816.628 |
| Hooded Crane | -5099033.804 | 7212837.619 |
| Hooded Crane | -5101104.346 | 7214574.338 |
| Hooded Crane | -5099777.418 | 7211582.079 |
| Hooded Crane | -5099343.272 | 7210145.515 |
| Hooded Crane | -5101037.554 | 7212767.013 |
| Hooded Crane | -4816914.592 | 6739177.051 |
| Hooded Crane | -4875041.177 | 6968745.572 |
| Hooded Crane | -5101070.95  | 7214268.953 |
| Hooded Crane | -5102313.276 | 7215217.595 |
| Hooded Crane | -4812143.438 | 6737068.956 |
| Hooded Crane | -4964553.18  | 7252717.495 |
| Hooded Crane | -5100273.903 | 7214272.77  |
| Hooded Crane | -5100006.736 | 7209695.332 |
| Hooded Crane | -5103350.773 | 7213749.826 |
| Hooded Crane | -5100509.9   | 7214793.841 |
| Hooded Crane | -5091789.131 | 7219605.375 |
| Hooded Crane | -5099928.812 | 7209752.558 |
| Hooded Crane | -5099530.289 | 7211448.522 |
| Hooded Crane | -4812179.061 | 6737099.504 |
| Hooded Crane | -4812147.891 | 6737045.595 |
| Hooded Crane | -5097130.24  | 7217850.348 |
| Hooded Crane | -5099826.398 | 7209559.901 |
| Hooded Crane | -4812156.797 | 6737068.956 |
| Hooded Crane | -5099695.041 | 7210057.766 |
| Hooded Crane | -5101001.932 | 7212808.995 |
| Hooded Crane | -5101665.396 | 7213196.382 |
| Hooded Crane | -5100269.45  | 7214282.313 |
| Hooded Crane | -4812459.586 | 6735516.543 |
| Hooded Crane | -5099559.232 | 7210956.292 |
| Hooded Crane | -5097128.014 | 7217861.805 |
| Hooded Crane | -4812508.566 | 6735863.294 |

|              |              |             |
|--------------|--------------|-------------|
| Hooded Crane | -5101469.474 | 7213345.235 |
| Hooded Crane | -5098815.617 | 7213473.099 |
| Hooded Crane | -4817912.014 | 6740809.272 |
| Hooded Crane | -5101587.473 | 7213448.289 |
| Hooded Crane | -5099984.472 | 7211860.646 |
| Hooded Crane | -5100278.355 | 7214278.496 |
| Hooded Crane | -5099784.097 | 7212179.294 |
| Hooded Crane | -5097141.372 | 7217808.34  |
| Hooded Crane | -5093427.754 | 7223206.424 |
| Hooded Crane | -5086594.964 | 7221868.97  |
| Hooded Crane | -4965172.116 | 7252596.657 |
| Hooded Crane | -5101088.761 | 7214288.039 |
| Hooded Crane | -5100305.072 | 7214242.232 |
| Hooded Crane | -5099623.797 | 7211139.444 |
| Hooded Crane | -5101077.629 | 7213446.381 |
| Hooded Crane | -5100431.976 | 7209170.787 |
| Hooded Crane | -5099770.739 | 7209239.453 |
| Hooded Crane | -5100325.11  | 7208003.563 |
| Hooded Crane | -5100264.997 | 7214272.77  |
| Hooded Crane | -5103068.022 | 7215715.822 |
| Hooded Crane | -5097125.788 | 7217846.529 |
| Hooded Crane | -5097132.467 | 7217859.896 |
| Hooded Crane | -5100300.619 | 7214316.669 |
| Hooded Crane | -5086606.096 | 7221859.417 |
| Hooded Crane | -5101044.234 | 7214236.507 |
| Hooded Crane | -4892843.39  | 6953053.923 |
| Hooded Crane | -4812143.438 | 6737115.676 |
| Hooded Crane | -5101580.794 | 7213375.77  |
| Hooded Crane | -5101950.374 | 7212854.794 |
| Hooded Crane | -5100803.783 | 7214728.944 |
| Hooded Crane | -4809721.126 | 6737518.205 |
| Hooded Crane | -5100592.276 | 7207738.483 |
| Hooded Crane | -5101088.761 | 7214484.63  |
| Hooded Crane | -5102003.808 | 7212398.729 |
| Hooded Crane | -5093240.737 | 7223044.006 |
| Hooded Crane | -5099728.437 | 7209304.305 |
| Hooded Crane | -4812130.08  | 6737068.956 |
| Hooded Crane | -4812285.927 | 6735780.648 |
| Hooded Crane | -5101044.234 | 7212782.279 |
| Hooded Crane | -5102749.648 | 7214599.151 |
| Hooded Crane | -4812136.759 | 6737072.55  |
| Hooded Crane | -5100431.976 | 7207988.307 |
| Hooded Crane | -5097128.014 | 7217856.077 |
| Hooded Crane | -5100296.167 | 7214286.131 |
| Hooded Crane | -4813321.199 | 6734778.174 |
| Hooded Crane | -5103470.998 | 7211662.214 |
| Hooded Crane | -5100073.528 | 7211568.723 |
| Hooded Crane | -5100999.706 | 7212810.903 |
| Hooded Crane | -5097130.24  | 7217856.077 |
| Hooded Crane | -5100262.771 | 7214265.136 |
| Hooded Crane | -4811217.26  | 6736979.109 |
| Hooded Crane | -5101037.554 | 7212786.096 |
| Hooded Crane | -5100313.978 | 7212253.71  |
| Hooded Crane | -4812187.966 | 6735852.514 |
| Hooded Crane | -5100282.808 | 7214253.684 |
| Hooded Crane | -4814278.546 | 6734803.324 |
| Hooded Crane | -5100193.753 | 7211929.336 |
| Hooded Crane | -5093766.165 | 7223305.787 |

|              |              |             |
|--------------|--------------|-------------|
| Hooded Crane | -5099614.891 | 7211019.25  |
| Hooded Crane | -4812152.344 | 6737054.58  |
| Hooded Crane | -5101088.761 | 7214289.948 |
| Hooded Crane | -5097969.589 | 7217101.861 |
| Hooded Crane | -4964544.274 | 7252600.493 |
| Hooded Crane | -5018438.492 | 7273489.24  |
| Hooded Crane | -4811028.017 | 6736856.919 |
| Hooded Crane | -5104243.556 | 7215041.983 |
| Hooded Crane | -4812123.401 | 6735759.088 |
| Hooded Crane | -5099038.256 | 7212997.915 |
| Hooded Crane | -5101075.403 | 7214289.948 |
| Hooded Crane | -5099091.69  | 7213247.908 |
| Hooded Crane | -5100883.934 | 7214093.362 |
| Hooded Crane | -5100445.335 | 7209138.362 |
| Hooded Crane | -4813436.971 | 6734587.754 |
| Hooded Crane | -4874313.148 | 6966385.496 |
| Hooded Crane | -4811992.044 | 6735399.765 |
| Hooded Crane | -5099801.908 | 7209350.082 |
| Hooded Crane | -5097128.014 | 7217856.077 |
| Hooded Crane | -5101079.856 | 7214284.222 |
| Hooded Crane | -4812136.759 | 6735568.645 |
| Hooded Crane | -5100518.806 | 7214662.139 |
| Hooded Crane | -5094471.931 | 7220524.105 |
| Hooded Crane | -4873658.589 | 6966526.045 |
| Hooded Crane | -4812165.702 | 6737076.143 |
| Hooded Crane | -4812533.057 | 6735577.628 |
| Hooded Crane | -5102522.556 | 7214795.75  |
| Hooded Crane | -5102326.634 | 7215162.239 |
| Hooded Crane | -5100267.224 | 7214291.857 |
| Hooded Crane | -4857087.57  | 6959006.474 |
| Hooded Crane | -4812154.57  | 6737045.595 |
| Hooded Crane | -5100285.035 | 7214335.755 |
| Hooded Crane | -5101142.195 | 7213799.447 |
| Hooded Crane | -5101097.667 | 7214435.005 |
| Hooded Crane | -5100276.129 | 7214337.664 |
| Hooded Crane | -4812132.306 | 6737056.377 |
| Hooded Crane | -5099641.608 | 7211246.285 |
| Hooded Crane | -5099534.741 | 7210280.957 |
| Hooded Crane | -4856337.276 | 6956693.627 |
| Hooded Crane | -4812170.155 | 6737040.205 |
| Hooded Crane | -5097359.558 | 7217970.648 |
| Hooded Crane | -5099590.401 | 7210263.788 |
| Hooded Crane | -5103353     | 7215538.289 |
| Hooded Crane | -5101872.451 | 7212560.925 |
| Hooded Crane | -5099249.763 | 7212393.005 |
| Hooded Crane | -5101843.508 | 7212259.435 |
| Hooded Crane | -5102041.656 | 7215269.134 |
| Hooded Crane | -5100113.603 | 7208779.786 |
| Hooded Crane | -5100280.582 | 7214270.862 |
| Hooded Crane | -5099632.702 | 7210998.264 |
| Hooded Crane | -5102999.004 | 7214971.357 |
| Hooded Crane | -4812125.627 | 6737058.174 |
| Hooded Crane | -5100743.671 | 7214085.728 |
| Hooded Crane | -5099775.191 | 7209346.268 |
| Hooded Crane | -4812156.797 | 6737058.174 |
| Hooded Crane | -5099695.041 | 7211452.338 |
| Hooded Crane | -5101576.341 | 7213461.648 |
| Hooded Crane | -5100924.009 | 7214673.591 |

|              |              |             |
|--------------|--------------|-------------|
| Hooded Crane | -5100280.582 | 7214272.77  |
| Hooded Crane | -5101972.638 | 7212679.234 |
| Hooded Crane | -5099759.607 | 7209399.675 |
| Hooded Crane | -5100981.895 | 7212831.894 |
| Hooded Crane | -5100296.167 | 7214312.851 |
| Hooded Crane | -5102041.656 | 7212938.758 |
| Hooded Crane | -5101139.968 | 7214999.989 |
| Hooded Crane | -5100262.771 | 7214280.405 |
| Hooded Crane | -5101037.554 | 7212784.188 |
| Hooded Crane | -5099919.907 | 7212110.602 |
| Hooded Crane | -5100763.708 | 7214644.96  |
| Hooded Crane | -5097105.75  | 7217844.62  |
| Hooded Crane | -5103355.226 | 7215538.289 |
| Hooded Crane | -5099804.134 | 7209321.471 |
| Hooded Crane | -5099102.822 | 7213177.299 |
| Hooded Crane | -5101527.36  | 7213518.901 |
| Hooded Crane | -5100908.424 | 7213759.368 |
| Hooded Crane | -5097148.051 | 7217798.792 |
| Hooded Crane | -5099096.143 | 7210111.179 |
| Hooded Crane | -5101075.403 | 7214265.136 |
| Hooded Crane | -5102631.65  | 7215366.487 |
| Hooded Crane | -5099953.303 | 7209365.342 |
| Hooded Crane | -5100258.318 | 7208327.775 |
| Hooded Crane | -5100282.808 | 7214268.953 |
| Hooded Crane | -4813303.387 | 6735110.521 |
| Hooded Crane | -5100972.989 | 7212822.353 |
| Hooded Crane | -5097119.108 | 7217856.077 |
| Hooded Crane | -5100298.393 | 7214331.938 |
| Hooded Crane | -5102144.07  | 7215057.253 |
| Hooded Crane | -5100300.619 | 7214349.116 |
| Hooded Crane | -5100264.997 | 7214272.77  |
| Hooded Crane | -5099719.532 | 7210183.668 |
| Hooded Crane | -5099666.098 | 7209811.691 |
| Hooded Crane | -5100264.997 | 7214286.131 |
| Hooded Crane | -4873990.321 | 6967397.135 |
| Hooded Crane | -5101638.68  | 7214427.37  |
| Hooded Crane | -5099603.759 | 7210113.086 |
| Hooded Crane | -5100984.121 | 7212904.409 |
| Hooded Crane | -5100977.442 | 7207664.109 |
| Hooded Crane | -5099191.877 | 7212396.821 |
| Hooded Crane | -5094460.799 | 7220623.434 |
| Hooded Crane | -5100993.027 | 7212818.536 |
| Hooded Crane | -4812726.752 | 6736909.029 |
| Hooded Crane | -4814287.452 | 6734774.581 |
| Hooded Crane | -5100369.637 | 7212228.905 |
| Hooded Crane | -5097103.524 | 7217829.344 |
| Hooded Crane | -5101965.959 | 7212976.924 |
| Hooded Crane | -5100966.31  | 7212816.628 |
| Hooded Crane | -5097132.467 | 7217857.986 |
| Hooded Crane | -4812190.192 | 6735459.052 |
| Hooded Crane | -5099410.063 | 7211803.405 |
| Hooded Crane | -5015490.752 | 7277457.845 |
| Hooded Crane | -4811934.158 | 6735451.866 |
| Hooded Crane | -5099027.124 | 7213099.056 |
| Hooded Crane | -5100267.224 | 7214265.136 |
| Hooded Crane | -5102751.875 | 7215450.479 |
| Hooded Crane | -5099585.948 | 7211061.222 |
| Hooded Crane | -5101001.932 | 7214448.365 |

|              |              |             |
|--------------|--------------|-------------|
| Hooded Crane | -5101551.85  | 7213509.359 |
| Hooded Crane | -5099594.854 | 7210962.016 |
| Hooded Crane | -5097192.579 | 7217819.797 |
| Hooded Crane | -5100298.393 | 7214307.126 |
| Hooded Crane | -5102409.011 | 7206544.779 |
| Hooded Crane | -5100761.482 | 7214118.173 |
| Hooded Crane | -5101119.931 | 7213455.923 |
| Hooded Crane | -5101400.456 | 7212988.374 |
| Hooded Crane | -5102081.731 | 7215292.041 |
| Hooded Crane | -5101224.571 | 7214656.413 |
| Hooded Crane | -4812163.476 | 6737063.565 |
| Hooded Crane | -5101135.516 | 7213478.824 |
| Hooded Crane | -5101048.686 | 7208013.099 |
| Hooded Crane | -5099577.043 | 7211087.932 |
| Hooded Crane | -4817466.736 | 6740541.407 |
| Hooded Crane | -5106289.608 | 7225977.595 |
| Hooded Crane | -5100273.903 | 7214270.862 |
| Hooded Crane | -5102645.008 | 7215851.36  |
| Hooded Crane | -5099735.116 | 7209350.082 |
| Hooded Crane | -4812136.759 | 6737067.159 |
| Hooded Crane | -5099530.289 | 7209186.046 |
| Hooded Crane | -5100839.406 | 7214230.781 |
| Hooded Crane | -5094460.799 | 7220545.117 |
| Hooded Crane | -5099663.872 | 7210172.222 |
| Hooded Crane | -5099561.458 | 7209296.675 |
| Hooded Crane | -4812136.759 | 6737059.971 |
| Hooded Crane | -5100262.771 | 7214286.131 |
| Hooded Crane | -5102072.826 | 7215282.496 |
| Hooded Crane | -4814236.245 | 6734542.844 |
| Hooded Crane | -5099570.364 | 7209355.805 |
| Hooded Crane | -5098989.276 | 7213104.781 |
| Hooded Crane | -5099541.42  | 7209187.954 |
| Hooded Crane | -5100863.896 | 7214364.385 |
| Hooded Crane | -5099203.009 | 7212591.456 |
| Hooded Crane | -5101863.545 | 7212940.666 |
| Hooded Crane | -5100302.846 | 7214320.486 |
| Hooded Crane | -4812134.533 | 6737029.423 |
| Hooded Crane | -5100345.147 | 7214259.41  |
| Hooded Crane | -4814229.566 | 6734567.994 |
| Hooded Crane | -5099801.908 | 7209321.471 |
| Hooded Crane | -5101039.781 | 7212786.096 |
| Hooded Crane | -5101591.925 | 7213473.099 |
| Hooded Crane | -5100276.129 | 7214782.389 |
| Hooded Crane | -4811934.158 | 6735631.526 |
| Hooded Crane | -5102139.617 | 7215072.524 |
| Hooded Crane | -5100298.393 | 7212259.435 |
| Hooded Crane | -4809832.446 | 6738132.819 |
| Hooded Crane | -5101251.288 | 7214482.721 |
| Hooded Crane | -5101144.421 | 7213287.984 |
| Hooded Crane | -5097246.013 | 7207919.652 |
| Hooded Crane | -5100267.224 | 7214272.77  |
| Hooded Crane | -5100975.216 | 7212808.995 |
| Hooded Crane | -5097123.561 | 7217850.348 |
| Hooded Crane | -4812154.57  | 6737070.753 |
| Hooded Crane | -4812147.891 | 6737072.55  |
| Hooded Crane | -4812134.533 | 6737056.377 |
| Hooded Crane | -5100240.507 | 7214276.588 |
| Hooded Crane | -5100846.085 | 7214228.872 |

|              |              |             |
|--------------|--------------|-------------|
| Hooded Crane | -5102070.599 | 7215278.679 |
| Hooded Crane | -5101473.927 | 7213328.06  |
| Hooded Crane | -4812132.306 | 6737063.565 |
| Hooded Crane | -5102063.92  | 7215290.132 |
| Hooded Crane | -5100454.24  | 7209147.899 |
| Hooded Crane | -5100975.216 | 7212826.17  |
| Hooded Crane | -4812127.854 | 6737042.001 |
| Hooded Crane | -5100020.094 | 7209248.99  |
| Hooded Crane | -5099886.511 | 7210378.247 |
| Hooded Crane | -4812138.986 | 6737061.768 |
| Hooded Crane | -4818263.784 | 6742058.828 |
| Hooded Crane | -4812145.665 | 6737160.6   |
| Hooded Crane | -4812150.117 | 6737081.534 |
| Hooded Crane | -4809805.729 | 6738122.036 |
| Hooded Crane | -5100988.574 | 7212780.371 |
| Hooded Crane | -5100403.033 | 7207866.254 |
| Hooded Crane | -5100705.822 | 7213900.598 |
| Hooded Crane | -5101754.452 | 7212671.601 |
| Hooded Crane | -4812326.002 | 6737022.235 |
| Hooded Crane | -5102653.913 | 7206643.929 |
| Hooded Crane | -5100017.868 | 7211782.417 |
| Hooded Crane | -4888818.077 | 6969788.964 |
| Hooded Crane | -5100436.429 | 7207994.028 |
| Hooded Crane | -5097119.108 | 7217856.077 |
| Hooded Crane | -4809596.448 | 6737615.246 |
| Hooded Crane | -5101073.177 | 7214293.765 |
| Hooded Crane | -5100302.846 | 7214337.664 |
| Hooded Crane | -5100271.676 | 7214284.222 |
| Hooded Crane | -5100278.355 | 7214297.582 |
| Hooded Crane | -4812181.287 | 6737079.737 |
| Hooded Crane | -5097130.24  | 7217861.805 |
| Hooded Crane | -5100271.676 | 7214268.953 |
| Hooded Crane | -5097555.481 | 7206876.557 |
| Hooded Crane | -5099895.416 | 7208924.74  |
| Hooded Crane | -5101948.148 | 7213053.257 |
| Hooded Crane | -4810758.624 | 6737485.858 |
| Hooded Crane | -5092474.859 | 7220936.709 |
| Hooded Crane | -5102061.694 | 7214717.492 |
| Hooded Crane | -5100149.225 | 7208648.185 |
| Hooded Crane | -5100447.561 | 7209155.528 |
| Hooded Crane | -4812003.176 | 6737532.581 |
| Hooded Crane | -5099775.191 | 7209317.656 |
| Hooded Crane | -5100244.96  | 7214293.765 |
| Hooded Crane | -5101304.721 | 7214507.534 |
| Hooded Crane | -5100763.708 | 7214116.265 |
| Hooded Crane | -5097145.825 | 7217812.159 |
| Hooded Crane | -4812147.891 | 6737059.971 |
| Hooded Crane | -4964535.368 | 7252729.003 |
| Hooded Crane | -4888951.661 | 6969885.171 |
| Hooded Crane | -4812755.696 | 6736932.389 |
| Hooded Crane | -4812969.429 | 6735457.255 |
| Hooded Crane | -5101088.761 | 7214288.039 |
| Hooded Crane | -5099677.23  | 7209685.795 |
| Hooded Crane | -5100267.224 | 7214288.039 |
| Hooded Crane | -5101647.585 | 7214805.294 |
| Hooded Crane | -5102117.353 | 7215047.709 |
| Hooded Crane | -5100269.45  | 7214288.039 |
| Hooded Crane | -4810645.078 | 6737223.495 |

|              |              |             |
|--------------|--------------|-------------|
| Hooded Crane | -4893558.061 | 6950796.337 |
| Hooded Crane | -5100347.374 | 7212030.463 |
| Hooded Crane | -4811230.618 | 6738175.951 |
| Hooded Crane | -5100207.111 | 7208297.26  |
| Hooded Crane | -4812392.794 | 6737068.956 |
| Hooded Crane | -4875128.006 | 6968826.966 |
| Hooded Crane | -5099552.552 | 7209207.028 |
| Hooded Crane | -4812769.054 | 6736853.325 |
| Hooded Crane | -5101556.303 | 7213163.94  |
| Hooded Crane | -4812143.438 | 6737050.986 |
| Hooded Crane | -4873814.436 | 6967585.791 |
| Hooded Crane | -5100311.751 | 7214291.857 |
| Hooded Crane | -5100494.315 | 7214583.882 |
| Hooded Crane | -5101208.986 | 7214936.999 |
| Hooded Crane | -5100289.487 | 7214305.217 |
| Hooded Crane | -5093305.303 | 7222938.914 |
| Hooded Crane | -4887072.588 | 6950683.751 |
| Hooded Crane | -5099795.229 | 7209361.527 |
| Hooded Crane | -4816482.672 | 6738202.909 |
| Hooded Crane | -4811994.27  | 6735448.272 |
| Hooded Crane | -5102420.142 | 7212686.867 |
| Hooded Crane | -4810925.603 | 6736416.69  |
| Hooded Crane | -4812156.797 | 6737059.971 |
| Hooded Crane | -5100289.487 | 7214270.862 |
| Hooded Crane | -5100975.216 | 7212812.812 |
| Hooded Crane | -5097128.014 | 7217871.353 |
| Hooded Crane | -4813617.308 | 6734629.071 |
| Hooded Crane | -4964501.973 | 7252021.264 |
| Hooded Crane | -5097920.609 | 7221114.365 |
| Hooded Crane | -5100264.997 | 7214289.948 |
| Hooded Crane | -5099479.082 | 7212076.257 |
| Hooded Crane | -5099793.003 | 7209338.638 |
| Hooded Crane | -4810856.585 | 6736670.043 |
| Hooded Crane | -5099559.232 | 7213669.669 |
| Hooded Crane | -5103535.564 | 7215538.289 |
| Hooded Crane | -5093407.717 | 7223053.56  |
| Hooded Crane | -5093559.111 | 7223340.182 |
| Hooded Crane | -5100253.865 | 7214274.679 |
| Hooded Crane | -5101082.082 | 7214289.948 |
| Hooded Crane | -4964326.088 | 7251560.981 |
| Hooded Crane | -5099893.19  | 7211778.601 |
| Hooded Crane | -5101542.945 | 7213505.542 |
| Hooded Crane | -5100837.179 | 7214158.254 |
| Hooded Crane | -4810567.154 | 6737216.307 |
| Hooded Crane | -5100915.103 | 7213784.178 |
| Hooded Crane | -5100269.45  | 7214284.222 |
| Hooded Crane | -5100839.406 | 7214219.329 |
| Hooded Crane | -5101698.792 | 7215360.761 |
| Hooded Crane | -5100305.072 | 7214316.669 |
| Hooded Crane | -5101458.342 | 7212694.5   |
| Hooded Crane | -5100273.903 | 7214274.679 |
| Hooded Crane | -4812702.262 | 6736930.592 |
| Hooded Crane | -5099795.229 | 7209306.212 |
| Hooded Crane | -5099570.364 | 7209336.731 |
| Hooded Crane | -5102006.034 | 7212663.968 |
| Hooded Crane | -5101079.856 | 7214288.039 |
| Hooded Crane | -5099801.908 | 7209363.434 |
| Hooded Crane | -5101021.97  | 7214608.695 |

|              |              |             |
|--------------|--------------|-------------|
| Hooded Crane | -5100280.582 | 7214259.41  |
| Hooded Crane | -5101273.552 | 7213125.773 |
| Hooded Crane | -4810190.894 | 6737525.393 |
| Hooded Crane | -5102157.428 | 7215051.527 |
| Hooded Crane | -5101108.799 | 7208064.59  |
| Hooded Crane | -5100316.204 | 7212236.537 |
| Hooded Crane | -5100852.764 | 7212017.106 |
| Hooded Crane | -4812165.702 | 6737076.143 |
| Hooded Crane | -4812724.526 | 6736979.109 |
| Hooded Crane | -5099739.569 | 7209380.601 |
| Hooded Crane | -5100543.296 | 7214095.271 |
| Hooded Crane | -5099516.93  | 7211229.114 |
| Hooded Crane | -5100972.989 | 7212803.27  |
| Hooded Crane | -5099746.248 | 7209273.786 |
| Hooded Crane | -5099650.514 | 7210723.543 |
| Hooded Crane | -4812130.08  | 6737049.189 |
| Hooded Crane | -5099002.634 | 7213037.99  |
| Hooded Crane | -5099706.173 | 7211494.313 |
| Hooded Crane | -4812141.212 | 6737083.331 |
| Hooded Crane | -4875506.492 | 6968564.287 |
| Hooded Crane | -4812134.533 | 6737049.189 |
| Hooded Crane | -4812909.316 | 6736788.637 |
| Hooded Crane | -5099539.194 | 7209193.676 |
| Hooded Crane | -5097119.108 | 7217861.805 |
| Hooded Crane | -5102124.033 | 7215082.068 |
| Hooded Crane | -5100394.128 | 7208158.039 |
| Hooded Crane | -5100296.167 | 7214333.846 |
| Hooded Crane | -5101551.85  | 7212971.199 |
| Hooded Crane | -5099846.436 | 7211944.6   |
| Hooded Crane | -5100118.055 | 7208690.145 |
| Hooded Crane | -4810685.153 | 6737430.15  |
| Hooded Crane | -5098942.522 | 7212963.566 |
| Hooded Crane | -4812150.117 | 6737042.001 |
| Hooded Crane | -5101070.95  | 7208062.683 |
| Hooded Crane | -5100287.261 | 7214289.948 |
| Hooded Crane | -5099238.631 | 7212391.097 |
| Hooded Crane | -5100271.676 | 7214284.222 |
| Hooded Crane | -5099131.765 | 7210147.423 |
| Hooded Crane | -5101540.719 | 7213497.908 |
| Hooded Crane | -5100262.771 | 7214274.679 |
| Hooded Crane | -5100307.299 | 7214293.765 |
| Hooded Crane | -5097148.051 | 7217806.43  |
| Hooded Crane | -4812127.854 | 6737045.595 |
| Hooded Crane | -5100549.975 | 7214310.943 |
| Hooded Crane | -4812138.986 | 6737056.377 |
| Hooded Crane | -5747006.748 | 6509301.793 |
| Hooded Crane | -4812163.476 | 6737079.737 |
| Hooded Crane | -4812132.306 | 6737076.143 |
| Hooded Crane | -4812506.34  | 6736260.37  |
| Hooded Crane | -5100409.712 | 7207896.767 |
| Hooded Crane | -5100445.335 | 7209144.084 |
| Hooded Crane | -5102014.94  | 7212600.997 |
| Hooded Crane | -5099349.951 | 7210042.505 |
| Hooded Crane | -5100977.442 | 7212784.188 |
| Hooded Crane | -5099200.783 | 7213011.274 |
| Hooded Crane | -5101184.496 | 7214448.365 |
| Hooded Crane | -5101077.629 | 7214282.313 |
| Hooded Crane | -5101727.735 | 7212885.326 |



|              |              |             |
|--------------|--------------|-------------|
| Hooded Crane | -5097729.139 | 7207229.325 |
| Hooded Crane | -4816560.596 | 6738945.187 |
| Hooded Crane | -5102039.43  | 7212967.383 |
| Hooded Crane | -5100400.807 | 7213975.031 |
| Hooded Crane | -5101916.978 | 7213028.448 |
| Hooded Crane | -5099706.173 | 7210153.146 |
| Hooded Crane | -4813269.992 | 6735128.486 |
| Hooded Crane | -4812691.13  | 6736883.872 |
| Hooded Crane | -5101643.132 | 7213389.129 |
| Hooded Crane | -4812141.212 | 6737050.986 |
| Hooded Crane | -4812194.645 | 6737034.814 |
| Hooded Crane | -5100458.693 | 7213975.031 |
| Hooded Crane | -5100779.293 | 7213803.264 |
| Hooded Crane | -5099748.475 | 7209626.663 |
| Hooded Crane | -4813051.805 | 6734943.448 |
| Hooded Crane | -5100271.676 | 7214299.491 |
| Hooded Crane | -5099931.039 | 7209702.962 |
| Hooded Crane | -4812154.57  | 6737050.986 |
| Hooded Crane | -5099626.023 | 7210036.782 |
| Hooded Crane | -4812154.57  | 6737061.768 |
| Hooded Crane | -5101253.514 | 7213392.945 |
| Hooded Crane | -4818662.308 | 6741697.425 |
| Hooded Crane | -4811201.675 | 6736722.152 |
| Hooded Crane | -4812136.759 | 6737086.925 |
| Hooded Crane | -5097143.599 | 7217802.611 |
| Hooded Crane | -5100460.919 | 7209226.101 |
| Hooded Crane | -5100293.94  | 7214282.313 |
| Hooded Crane | -4814229.566 | 6734541.048 |
| Hooded Crane | -5099681.683 | 7210080.657 |
| Hooded Crane | -5100278.355 | 7214280.405 |
| Hooded Crane | -4812203.551 | 6737162.397 |
| Hooded Crane | -5100249.412 | 7208289.631 |
| Hooded Crane | -4815589.89  | 6740857.812 |
| Hooded Crane | -5099552.552 | 7209107.844 |
| Hooded Crane | -4875495.361 | 6968575.386 |
| Hooded Crane | -5099545.873 | 7209191.769 |
| Hooded Crane | -4812141.212 | 6737101.301 |
| Hooded Crane | -4884710.388 | 6959595.878 |
| Hooded Crane | -5099372.215 | 7210145.515 |
| Hooded Crane | -5016036.218 | 7272729.608 |
| Hooded Crane | -4812154.57  | 6737042.001 |
| Hooded Crane | -4964566.538 | 7252581.312 |
| Hooded Crane | -5100264.997 | 7214280.405 |
| Hooded Crane | -5100269.45  | 7214286.131 |
| Hooded Crane | -4812713.394 | 6736937.78  |
| Hooded Crane | -5093267.454 | 7222698.164 |
| Hooded Crane | -5100269.45  | 7212268.975 |
| Hooded Crane | -5100946.272 | 7212786.096 |
| Hooded Crane | -4812094.458 | 6735874.074 |
| Hooded Crane | -5101467.248 | 7213335.693 |
| Hooded Crane | -5098866.824 | 7213030.357 |
| Hooded Crane | -5101876.903 | 7213053.257 |
| Hooded Crane | -5103056.89  | 7215427.572 |
| Hooded Crane | -5099307.65  | 7210198.929 |
| Hooded Crane | -4812399.473 | 6736335.835 |
| Hooded Crane | -5099766.286 | 7209336.731 |
| Hooded Crane | -4893382.176 | 6952610.846 |
| Hooded Crane | -5101516.228 | 7213454.015 |

|              |              |             |
|--------------|--------------|-------------|
| Hooded Crane | -5017189.488 | 7269797.548 |
| Hooded Crane | -4812170.155 | 6737061.768 |
| Hooded Crane | -5100244.96  | 7214274.679 |
| Hooded Crane | -4812165.702 | 6737049.189 |
| Hooded Crane | -5102052.788 | 7212587.64  |
| Hooded Crane | -4812101.137 | 6737050.986 |
| Hooded Crane | -5097130.24  | 7217869.443 |
| Hooded Crane | -5100999.706 | 7212812.812 |
| Hooded Crane | -4817649.3   | 6741670.456 |
| Hooded Crane | -5101066.497 | 7214923.637 |
| Hooded Crane | -5102137.391 | 7215043.892 |
| Hooded Crane | -5093227.379 | 7223003.88  |
| Hooded Crane | -5100768.161 | 7214303.308 |
| Hooded Crane | -5100318.431 | 7212253.71  |
| Hooded Crane | -4892142.077 | 6952444.699 |
| Hooded Crane | -5099821.946 | 7209361.527 |
| Hooded Crane | -5100285.035 | 7214251.775 |
| Hooded Crane | -5099102.822 | 7210267.604 |
| Hooded Crane | -5101295.816 | 7212933.033 |
| Hooded Crane | -5099868.7   | 7211931.244 |
| Hooded Crane | -5098793.353 | 7213142.948 |
| Hooded Crane | -4892493.847 | 6952738.228 |
| Hooded Crane | -4812159.023 | 6737076.143 |
| Hooded Crane | -5099955.529 | 7208487.978 |
| Hooded Crane | -5097136.919 | 7217840.801 |
| Hooded Crane | -5100313.978 | 7212276.608 |
| Hooded Crane | -4812132.306 | 6737083.331 |
| Hooded Crane | -5094491.968 | 7220529.836 |
| Hooded Crane | -5100521.032 | 7214234.598 |
| Hooded Crane | -4812150.117 | 6737040.205 |
| Hooded Crane | -4812141.212 | 6737036.611 |
| Hooded Crane | -4896672.78  | 6952758.536 |
| Hooded Crane | -5098964.786 | 7213045.623 |
| Hooded Crane | -5093383.226 | 7223021.077 |
| Hooded Crane | -4812582.037 | 6735457.255 |
| Hooded Crane | -4875497.587 | 6968567.987 |
| Hooded Crane | -4894154.734 | 6953609.65  |
| Hooded Crane | -4812125.627 | 6737040.205 |
| Hooded Crane | -5101068.724 | 7208074.126 |
| Hooded Crane | -4884895.178 | 6959557.076 |
| Hooded Crane | -4814084.85  | 6734785.36  |
| Hooded Crane | -5100258.318 | 7214274.679 |
| Hooded Crane | -4812110.042 | 6737050.986 |
| Hooded Crane | -5099550.326 | 7209187.954 |
| Hooded Crane | -4812190.192 | 6737036.611 |
| Hooded Crane | -5099748.475 | 7209323.379 |
| Hooded Crane | -4812167.929 | 6737173.179 |
| Hooded Crane | -4812159.023 | 6737099.504 |
| Hooded Crane | -5099539.194 | 7209460.713 |
| Hooded Crane | -5100229.375 | 7214314.76  |
| Hooded Crane | -4855526.87  | 6956359.318 |
| Hooded Crane | -5099973.34  | 7209224.194 |
| Hooded Crane | -5099414.516 | 7210425.939 |
| Hooded Crane | -5100979.668 | 7212852.885 |
| Hooded Crane | -4812159.023 | 6737063.565 |
| Hooded Crane | -4812228.041 | 6735275.802 |
| Hooded Crane | -4812150.117 | 6737072.55  |
| Hooded Crane | -5103640.204 | 7215406.574 |

|              |              |             |
|--------------|--------------|-------------|
| Hooded Crane | -5101358.155 | 7213503.634 |
| Hooded Crane | -4812700.036 | 6736891.06  |
| Hooded Crane | -4812134.533 | 6737072.55  |
| Hooded Crane | -4812143.438 | 6737077.94  |
| Hooded Crane | -5100975.216 | 7213965.488 |
| Hooded Crane | -4812159.023 | 6737097.707 |
| Hooded Crane | -5100305.072 | 7214232.689 |
| Hooded Crane | -4971900.266 | 7328687.296 |
| Hooded Crane | -4892162.115 | 6952437.315 |
| Hooded Crane | -4810449.156 | 6737613.449 |
| Hooded Crane | -5100883.934 | 7214148.711 |
| Hooded Crane | -5100489.863 | 7214448.365 |
| Hooded Crane | -5100269.45  | 7214301.4   |
| Hooded Crane | -4886097.429 | 6949316.241 |
| Hooded Crane | -5018857.054 | 7273891.202 |
| Hooded Crane | -5101509.549 | 7213497.908 |
| Hooded Crane | -5097119.108 | 7217850.348 |
| Hooded Crane | -5099877.605 | 7210324.833 |
| Hooded Crane | -5099000.408 | 7212967.383 |
| Hooded Crane | -5101075.403 | 7208060.776 |
| Hooded Crane | -5101222.345 | 7214774.754 |
| Hooded Crane | -4888439.591 | 6969731.611 |
| Hooded Crane | -4812528.604 | 6736068.118 |
| Hooded Crane | -5100258.318 | 7214270.862 |
| Hooded Crane | -5099597.08  | 7209266.157 |
| Hooded Crane | -5100841.632 | 7214301.4   |
| Hooded Crane | -4892852.296 | 6952839.766 |
| Hooded Crane | -4812361.625 | 6737286.389 |
| Hooded Crane | -5100425.297 | 7209197.491 |
| Hooded Crane | -4812152.344 | 6737042.001 |
| Hooded Crane | -4812455.133 | 6735600.984 |
| Hooded Crane | -4816553.917 | 6741364.806 |
| Hooded Crane | -5100253.865 | 7214207.877 |
| Hooded Crane | -4812127.854 | 6737027.626 |
| Hooded Crane | -5102567.084 | 7212600.997 |
| Hooded Crane | -4812150.117 | 6737108.489 |
| Hooded Crane | -5099868.7   | 7210349.632 |
| Hooded Crane | -4885897.054 | 6949364.219 |
| Hooded Crane | -4812143.438 | 6737074.346 |
| Hooded Crane | -4963845.188 | 7250324.104 |
| Hooded Crane | -5101948.148 | 7212763.197 |
| Hooded Crane | -4892006.267 | 6950919.998 |
| Hooded Crane | -4812141.212 | 6737110.286 |
| Hooded Crane | -5075563.202 | 7240296.372 |
| Hooded Crane | -4895426.002 | 6947288.478 |
| Hooded Crane | -4812141.212 | 6737068.956 |
| Hooded Crane | -5100423.071 | 7209189.861 |
| Hooded Crane | -5100280.582 | 7214284.222 |
| Hooded Crane | -5091771.32  | 7219626.384 |
| Hooded Crane | -5097459.746 | 7206949.016 |
| Hooded Crane | -5102126.259 | 7215034.347 |
| Hooded Crane | -4812167.929 | 6737126.458 |
| Hooded Crane | -4883708.513 | 6960177.934 |
| Hooded Crane | -5102736.29  | 7212316.679 |
| Hooded Crane | -5099877.605 | 7208907.575 |
| Hooded Crane | -4894194.809 | 6950953.221 |
| Hooded Crane | -4893050.444 | 6953201.621 |
| Hooded Crane | -4886524.896 | 6950521.335 |

|              |              |             |
|--------------|--------------|-------------|
| Hooded Crane | -4889241.091 | 6969583.605 |
| Hooded Crane | -5099790.776 | 7211801.497 |
| Hooded Crane | -5100427.524 | 7209182.232 |
| Hooded Crane | -5100249.412 | 7214268.953 |
| Hooded Crane | -4888700.079 | 6969424.501 |
| Hooded Crane | -4812150.117 | 6737054.58  |
| Hooded Crane | -5102651.687 | 7205671.546 |
| Hooded Crane | -4892041.89  | 6952387.471 |
| Hooded Crane | -5099657.193 | 7210801.761 |
| Hooded Crane | -5096940.997 | 7207995.935 |
| Hooded Crane | -5100133.64  | 7209334.823 |
| Hooded Crane | -5098290.189 | 7201232.535 |
| Hooded Crane | -5100358.506 | 7212280.424 |
| Hooded Crane | -5019674.139 | 7274458.6   |
| Hooded Crane | -5099732.89  | 7209298.582 |
| Hooded Crane | -4897040.135 | 6952680.998 |
| Hooded Crane | -4812176.834 | 6737097.707 |
| Hooded Crane | -4818666.76  | 6741702.819 |
| Hooded Crane | -5099443.459 | 7205147.271 |
| Hooded Crane | -4901421.67  | 6961800.525 |
| Hooded Crane | -5100264.997 | 7214295.674 |
| Hooded Crane | -4812161.249 | 6737077.94  |
| Hooded Crane | -4888624.381 | 6969332.001 |
| Hooded Crane | -5101119.931 | 7212835.711 |
| Hooded Crane | -4888597.665 | 6968865.814 |
| Hooded Crane | -4888379.478 | 6969165.502 |
| Hooded Crane | -5101068.724 | 7208053.148 |
| Hooded Crane | -5099530.289 | 7209199.398 |
| Hooded Crane | -4887776.127 | 6987551.427 |
| Hooded Crane | -4892286.793 | 6952893.305 |
| Hooded Crane | -5100476.504 | 7211969.405 |
| Hooded Crane | -4888533.099 | 6968930.56  |
| Hooded Crane | -5100227.149 | 7208234.324 |
| Hooded Crane | -5101663.17  | 7213272.717 |
| Hooded Crane | -5019576.177 | 7275228.02  |
| Hooded Crane | -4896931.042 | 6952439.161 |
| Hooded Crane | -5100342.921 | 7209012.477 |
| Hooded Crane | -4888065.557 | 6969511.453 |
| Hooded Crane | -4891572.121 | 6952084.725 |
| Hooded Crane | -5100834.953 | 7208367.825 |
| Hooded Crane | -5100690.238 | 7208526.122 |
| Hooded Crane | -4888521.967 | 6968801.068 |
| Hooded Crane | -4889196.563 | 6969726.061 |
| Hooded Crane | -5100970.763 | 7212768.922 |
| Hooded Crane | -5100961.857 | 7212818.536 |
| Hooded Crane | -4888840.341 | 6969644.657 |
| Hooded Crane | -4818644.497 | 6741722.597 |
| Hooded Crane | -4812069.967 | 6737018.641 |
| Hooded Crane | -5099764.059 | 7209273.786 |
| Hooded Crane | -4814222.886 | 6734548.233 |
| Hooded Crane | -4812165.702 | 6737049.189 |
| Hooded Crane | -4812145.665 | 6737103.098 |
| Hooded Crane | -4896919.91  | 6952127.182 |
| Hooded Crane | -4812624.339 | 6736919.81  |
| Hooded Crane | -4812406.152 | 6737333.111 |
| Hooded Crane | -4888415.101 | 6969581.755 |
| Hooded Crane | -5096667.151 | 7207521.085 |
| Hooded Crane | -4888488.571 | 6969232.101 |

|              |              |             |
|--------------|--------------|-------------|
| Hooded Crane | -4889290.072 | 6970242.254 |
| Hooded Crane | -4894648.992 | 6950595.16  |
| Hooded Crane | -5097107.976 | 7217892.358 |
| Hooded Crane | -4885856.979 | 6949174.151 |
| Hooded Crane | -4812054.383 | 6737043.798 |
| Hooded Crane | -4889011.773 | 6969990.629 |
| Hooded Crane | -5101398.23  | 7213537.986 |
| Hooded Crane | -4889080.791 | 6969973.977 |
| Hooded Crane | -4888530.873 | 6969554.004 |
| Hooded Crane | -5100320.657 | 7214257.501 |
| Hooded Crane | -4891788.081 | 6952175.178 |
| Hooded Crane | -5096709.453 | 7208569.988 |
| Hooded Crane | -5099539.194 | 7210916.228 |
| Hooded Crane | -4812094.458 | 6737007.86  |
| Hooded Crane | -5100937.367 | 7212765.105 |
| Hooded Crane | -4893880.888 | 6950285.1   |
| Hooded Crane | -5099610.439 | 7211150.891 |
| Hooded Crane | -4812472.944 | 6737139.037 |
| Hooded Crane | -4812165.702 | 6737061.768 |
| Hooded Crane | -4888170.198 | 6969441.152 |
| Hooded Crane | -4813926.777 | 6734760.21  |
| Hooded Crane | -5103279.529 | 7204853.693 |
| Hooded Crane | -4812125.627 | 6737024.032 |
| Hooded Crane | -5102558.179 | 7214604.878 |
| Hooded Crane | -4812141.212 | 6737042.001 |
| Hooded Crane | -5097103.524 | 7217835.072 |
| Hooded Crane | -4888760.191 | 6969067.455 |
| Hooded Crane | -5099991.151 | 7209233.731 |
| Hooded Crane | -4815821.434 | 6736707.777 |
| Hooded Crane | -4810825.416 | 6737500.235 |
| Hooded Crane | -4891460.802 | 6952400.393 |
| Hooded Crane | -4893767.342 | 6950759.423 |
| Hooded Crane | -5100754.803 | 7214110.539 |
| Hooded Crane | -4812114.495 | 6737063.565 |
| Hooded Crane | -4891253.748 | 6952007.194 |
| Hooded Crane | -5022521.691 | 7267977.344 |
| Hooded Crane | -4898213.442 | 6958655.44  |
| Hooded Crane | -4888268.159 | 6970429.128 |
| Hooded Crane | -4889201.016 | 6969746.412 |
| Hooded Crane | -4813256.633 | 6735108.725 |
| Hooded Crane | -4809449.507 | 6737825.506 |
| Hooded Crane | -4856165.844 | 6956370.4   |
| Hooded Crane | -5100053.49  | 7208688.237 |
| Hooded Crane | -4891235.937 | 6952103.185 |
| Hooded Crane | -4892830.032 | 6952703.152 |
| Hooded Crane | -4891596.612 | 6951975.813 |
| Hooded Crane | -4892442.64  | 6950528.718 |
| Hooded Crane | -4813312.293 | 6735112.318 |
| Hooded Crane | -4812141.212 | 6737070.753 |
| Hooded Crane | -4812143.438 | 6737036.611 |
| Hooded Crane | -5100975.216 | 7214379.654 |
| Hooded Crane | -4812090.005 | 6737061.768 |
| Hooded Crane | -5102119.58  | 7215015.259 |
| Hooded Crane | -4812161.249 | 6737081.534 |
| Hooded Crane | -5096460.097 | 7208159.946 |
| Hooded Crane | -4888720.116 | 6970121.991 |
| Hooded Crane | -4888860.379 | 6968973.108 |
| Hooded Crane | -4971918.077 | 7328869.373 |

|              |              |             |
|--------------|--------------|-------------|
| Hooded Crane | -4888713.437 | 6968680.827 |
| Hooded Crane | -4812132.306 | 6737038.408 |
| Hooded Crane | -4812123.401 | 6737043.798 |
| Hooded Crane | -4812087.779 | 6735699.798 |
| Hooded Crane | -5099274.254 | 7210158.869 |
| Hooded Crane | -5101551.85  | 7212683.051 |
| Hooded Crane | -5100952.952 | 7212812.812 |
| Hooded Crane | -5101916.978 | 7212629.62  |
| Hooded Crane | -4888533.099 | 6968839.915 |
| Hooded Crane | -4889049.622 | 6969187.702 |
| Hooded Crane | -4888927.17  | 6968704.875 |
| Hooded Crane | -4812132.306 | 6735760.884 |
| Hooded Crane | -4885952.713 | 6949120.638 |
| Hooded Crane | -4888457.402 | 6968801.068 |
| Hooded Crane | -4890964.317 | 6945062.042 |
| Hooded Crane | -4812123.401 | 6737083.331 |
| Hooded Crane | -4812161.249 | 6737110.286 |
| Hooded Crane | -5099719.532 | 7209649.553 |
| Hooded Crane | -5100271.676 | 7214242.232 |
| Hooded Crane | -5099864.247 | 7210378.247 |
| Hooded Crane | -5100512.126 | 7209157.436 |
| Hooded Crane | -5101812.338 | 7212755.564 |
| Hooded Crane | -5097252.692 | 7208680.608 |
| Hooded Crane | -4888038.841 | 6969559.554 |
| Hooded Crane | -4895238.985 | 6950916.307 |
| Hooded Crane | -4898046.463 | 6958624.032 |
| Hooded Crane | -5017216.204 | 7269809.082 |
| Hooded Crane | -4812179.061 | 6737065.362 |
| Hooded Crane | -5102789.723 | 7205570.501 |
| Hooded Crane | -4810155.272 | 6737848.869 |
| Hooded Crane | -4811177.185 | 6736914.42  |
| Hooded Crane | -4897915.106 | 6952516.696 |
| Hooded Crane | -4888439.591 | 6969677.959 |
| Hooded Crane | -4810834.321 | 6737250.449 |
| Hooded Crane | -4857000.74  | 6955328.773 |
| Hooded Crane | -4812127.854 | 6737056.377 |
| Hooded Crane | -4888134.575 | 6969877.77  |
| Hooded Crane | -4897763.711 | 6956241.112 |
| Hooded Crane | -4812187.966 | 6737015.047 |
| Hooded Crane | -4894646.766 | 6950609.925 |
| Hooded Crane | -4891930.57  | 6952345.012 |
| Hooded Crane | -4889290.072 | 6970223.752 |
| Hooded Crane | -5100961.857 | 7212902.501 |
| Hooded Crane | -4888181.33  | 6969417.101 |
| Hooded Crane | -4812116.722 | 6736889.263 |
| Hooded Crane | -5099327.687 | 7210031.06  |
| Hooded Crane | -4812219.136 | 6735786.038 |
| Hooded Crane | -4812085.552 | 6735726.748 |
| Hooded Crane | -4812141.212 | 6737063.565 |
| Hooded Crane | -4894154.734 | 6951178.401 |
| Hooded Crane | -5097114.656 | 7217848.439 |
| Hooded Crane | -4812125.627 | 6737040.205 |
| Hooded Crane | -4901319.256 | 6962066.677 |
| Hooded Crane | -4812134.533 | 6737049.189 |
| Hooded Crane | -4897024.55  | 6952902.536 |
| Hooded Crane | -4892389.206 | 6952656.999 |
| Hooded Crane | -4810716.322 | 6737419.368 |
| Hooded Crane | -4812132.306 | 6737025.829 |

|              |              |             |
|--------------|--------------|-------------|
| Hooded Crane | -4888170.198 | 6969322.751 |
| Hooded Crane | -4811793.895 | 6737622.434 |
| Hooded Crane | -4812156.797 | 6737050.986 |
| Hooded Crane | -4812114.495 | 6737042.001 |
| Hooded Crane | -4812170.155 | 6737018.641 |
| Hooded Crane | -4891785.855 | 6952178.87  |
| Hooded Crane | -4814449.978 | 6735708.781 |
| Hooded Crane | -5100449.788 | 7209140.27  |
| Hooded Crane | -4813530.479 | 6734612.903 |
| Hooded Crane | -5096054.894 | 7216462.267 |
| Hooded Crane | -4812165.702 | 6737015.047 |
| Hooded Crane | -4897204.888 | 6952119.799 |
| Hooded Crane | -4889205.469 | 6969698.31  |
| Hooded Crane | -4888826.983 | 6969866.669 |
| Hooded Crane | -4809952.671 | 6737563.131 |
| Hooded Crane | -4888584.306 | 6969459.652 |
| Hooded Crane | -4812818.034 | 6735480.611 |
| Hooded Crane | -5101066.497 | 7207646.946 |
| Hooded Crane | -4812141.212 | 6737139.037 |
| Hooded Crane | -4893854.171 | 6950277.718 |
| Hooded Crane | -4818657.855 | 6741695.627 |
| Hooded Crane | -4812127.854 | 6737121.067 |
| Hooded Crane | -4814307.489 | 6735627.933 |
| Hooded Crane | -4888243.669 | 6968989.758 |
| Hooded Crane | -4891287.143 | 6951855.827 |
| Hooded Crane | -4893702.776 | 6951187.63  |
| Hooded Crane | -4812145.665 | 6736980.906 |
| Hooded Crane | -4889047.395 | 6969811.166 |
| Hooded Crane | -4892814.447 | 6952716.075 |
| Hooded Crane | -4893992.207 | 6950597.006 |
| Hooded Crane | -5015481.847 | 7273989.292 |
| Hooded Crane | -5101315.853 | 7213404.396 |
| Hooded Crane | -4887818.428 | 6970147.894 |
| Hooded Crane | -4889103.055 | 6969996.179 |
| Hooded Crane | -5101358.155 | 7207116.819 |
| Hooded Crane | -5018781.356 | 7272943.067 |
| Hooded Crane | -4894228.204 | 6950707.744 |
| Hooded Crane | -4894631.181 | 6950633.919 |
| Hooded Crane | -4888695.626 | 6969435.601 |
| Hooded Crane | -5099755.154 | 7209273.786 |
| Hooded Crane | -4888599.891 | 6969058.205 |
| Hooded Crane | -5099703.947 | 7209632.385 |
| Hooded Crane | -4888542.005 | 6968738.172 |
| Hooded Crane | -4814256.282 | 6735647.696 |
| Hooded Crane | -4885899.28  | 6949329.158 |
| Hooded Crane | -4898725.512 | 6951202.396 |
| Hooded Crane | -4889294.525 | 6970212.651 |
| Hooded Crane | -5097105.75  | 7217852.258 |
| Hooded Crane | -4888332.724 | 6969689.059 |
| Hooded Crane | -4888639.966 | 6969533.653 |
| Hooded Crane | -4812105.59  | 6737052.783 |
| Hooded Crane | -4889083.018 | 6969979.528 |
| Hooded Crane | -4889201.016 | 6969759.363 |
| Hooded Crane | -4891790.308 | 6952171.486 |
| Hooded Crane | -4888613.249 | 6969204.352 |
| Hooded Crane | -4888110.085 | 6969446.702 |
| Hooded Crane | -5101905.846 | 7212994.099 |
| Hooded Crane | -4895621.924 | 6947341.979 |

|              |              |             |
|--------------|--------------|-------------|
| Hooded Crane | -5102838.704 | 7205498.055 |
| Hooded Crane | -5100409.712 | 7209159.343 |
| Hooded Crane | -4888546.458 | 6968817.717 |
| Hooded Crane | -4896786.326 | 6952669.922 |
| Hooded Crane | -4893615.947 | 6950626.536 |
| Hooded Crane | -4895909.129 | 6954311.288 |
| Hooded Crane | -4888642.192 | 6969443.002 |
| Hooded Crane | -4888559.816 | 6969454.102 |
| Hooded Crane | -4888330.498 | 6969640.957 |
| Hooded Crane | -4817259.682 | 6741433.126 |
| Hooded Crane | -4889100.829 | 6969968.427 |
| Hooded Crane | -4888573.174 | 6969457.802 |
| Hooded Crane | -4885912.638 | 6949338.385 |
| Hooded Crane | -4856363.993 | 6956525.547 |
| Hooded Crane | -4812461.812 | 6735768.071 |
| Hooded Crane | -4888090.048 | 6969518.853 |
| Hooded Crane | -4891790.308 | 6952178.87  |
| Hooded Crane | -5102253.163 | 7212669.693 |
| Hooded Crane | -4897256.095 | 6952309.937 |
| Hooded Crane | -4812381.662 | 6736150.768 |
| Hooded Crane | -4894087.942 | 6953912.454 |
| Hooded Crane | -5100140.319 | 7209517.937 |
| Hooded Crane | -5099510.251 | 7211307.337 |
| Hooded Crane | -4813929.003 | 6734744.042 |
| Hooded Crane | -5097535.443 | 7207454.342 |
| Hooded Crane | -4812568.679 | 6735985.469 |
| Hooded Crane | -4888366.12  | 6969071.155 |
| Hooded Crane | -5100454.24  | 7208024.541 |
| Hooded Crane | -4894257.147 | 6951158.098 |
| Hooded Crane | -4883648.4   | 7090781.577 |
| Hooded Crane | -4883948.963 | 7098552.049 |
| Hooded Crane | -4888506.383 | 6969578.055 |
| Hooded Crane | -4898275.781 | 6952601.616 |
| Hooded Crane | -4888435.138 | 6969555.854 |
| Hooded Crane | -4891763.591 | 6952195.484 |
| Hooded Crane | -4814285.225 | 6734769.192 |
| Hooded Crane | -4892823.352 | 6952719.767 |
| Hooded Crane | -4893863.076 | 6950218.66  |
| Hooded Crane | -4896145.126 | 6946666.784 |
| Hooded Crane | -4888773.549 | 6968658.629 |
| Hooded Crane | -5102651.687 | 7212448.342 |
| Hooded Crane | -5099966.661 | 7210069.211 |
| Hooded Crane | -4893767.342 | 6950790.8   |
| Hooded Crane | -5100327.336 | 7214162.071 |
| Hooded Crane | -4888310.46  | 6969668.708 |
| Hooded Crane | -4888236.989 | 6969302.401 |
| Hooded Crane | -4888170.198 | 6969413.401 |
| Hooded Crane | -4888121.217 | 6970212.651 |
| Hooded Crane | -4812141.212 | 6737045.595 |
| Hooded Crane | -4895702.074 | 6947196.235 |
| Hooded Crane | -4812150.117 | 6737099.504 |
| Hooded Crane | -4888793.587 | 6969794.515 |
| Hooded Crane | -4888931.623 | 6968714.124 |
| Hooded Crane | -4888090.048 | 6987508.779 |
| Hooded Crane | -4812159.023 | 6737059.971 |
| Hooded Crane | -4891578.801 | 6970725.175 |
| Hooded Crane | -4891799.213 | 6952182.562 |
| Hooded Crane | -4892823.352 | 6952732.69  |



|              |              |             |
|--------------|--------------|-------------|
| Hooded Crane | -5100204.885 | 7209020.106 |
| Hooded Crane | -5090511.183 | 7224360.64  |
| Hooded Crane | -4891129.07  | 6952232.405 |
| Hooded Crane | -4810282.176 | 6737809.332 |
| Hooded Crane | -4888259.253 | 6969476.302 |
| Hooded Crane | -5100986.347 | 7214116.265 |
| Hooded Crane | -5100260.544 | 7214289.948 |
| Hooded Crane | -5100663.521 | 7214083.819 |
| Hooded Crane | -4888481.892 | 6969729.761 |
| Hooded Crane | -4896919.91  | 6953161.003 |
| Hooded Crane | -4894648.992 | 6950515.798 |
| Hooded Crane | -5100382.996 | 7208844.634 |
| Hooded Crane | -4888526.42  | 6969322.751 |
| Hooded Crane | -5719615.474 | 6550509.266 |
| Hooded Crane | -5099817.493 | 7210059.673 |
| Hooded Crane | -4888506.383 | 6969574.355 |
| Hooded Crane | -4888179.103 | 6969777.864 |
| Hooded Crane | -4892961.389 | 6945030.688 |
| Hooded Crane | -4886389.086 | 6949858.787 |
| Hooded Crane | -5100995.253 | 7214994.263 |
| Hooded Crane | -5103655.789 | 7215435.208 |
| Hooded Crane | -4888185.782 | 6969518.853 |
| Hooded Crane | -4888564.269 | 6968778.869 |
| Hooded Crane | -4887241.793 | 6989261.246 |
| Hooded Crane | -5096691.642 | 7208198.088 |
| Hooded Crane | -4888530.873 | 6969640.957 |
| Hooded Crane | -4894648.992 | 6950600.697 |
| Hooded Crane | -5099988.925 | 7209329.101 |
| Hooded Crane | -4812165.702 | 6737085.128 |
| Hooded Crane | -4897122.511 | 6952282.247 |
| Hooded Crane | -4888826.983 | 6969925.874 |
| Hooded Crane | -5099479.082 | 7210923.859 |
| Hooded Crane | -5100679.106 | 7214927.455 |
| Hooded Crane | -4888499.703 | 6968913.911 |
| Hooded Crane | -5100247.186 | 7214295.674 |
| Hooded Crane | -5099988.925 | 7209540.826 |
| Hooded Crane | -4896893.193 | 6952110.569 |
| Hooded Crane | -4888642.192 | 6969359.751 |
| Hooded Crane | -4885015.403 | 6984965.148 |
| Hooded Crane | -4895902.45  | 6954307.595 |
| Hooded Crane | -4893827.454 | 6951163.635 |
| Hooded Crane | -4888312.687 | 6969698.31  |
| Hooded Crane | -4888488.571 | 6969700.16  |
| Hooded Crane | -5101122.157 | 7213381.495 |
| Hooded Crane | -4818684.572 | 6741731.587 |
| Hooded Crane | -4893914.283 | 6950369.996 |
| Hooded Crane | -4812141.212 | 6737095.91  |
| Hooded Crane | -4889229.959 | 6969652.057 |
| Hooded Crane | -4896218.597 | 6954494.093 |
| Hooded Crane | -4888341.63  | 6969624.306 |
| Hooded Crane | -4894635.634 | 6950632.073 |
| Hooded Crane | -4888319.366 | 6969583.605 |
| Hooded Crane | -4895902.45  | 6954285.437 |
| Hooded Crane | -4883913.34  | 6976883.61  |
| Hooded Crane | -4889937.951 | 6987467.986 |
| Hooded Crane | -4893589.231 | 6950436.437 |
| Hooded Crane | -5101070.95  | 7213736.466 |
| Hooded Crane | -5101024.196 | 7214165.888 |

|              |              |             |
|--------------|--------------|-------------|
| Hooded Crane | -5099746.248 | 7210462.185 |
| Hooded Crane | -4888147.934 | 6969981.378 |
| Hooded Crane | -4888842.567 | 6968902.812 |
| Hooded Crane | -4888960.566 | 6969539.204 |
| Hooded Crane | -4886638.442 | 6949622.572 |
| Hooded Crane | -4888301.555 | 6969372.701 |
| Hooded Crane | -4898298.045 | 6958635.117 |
| Hooded Crane | -4888593.212 | 6969455.952 |
| Hooded Crane | -4888619.928 | 6969285.751 |
| Hooded Crane | -4888054.425 | 6969559.554 |
| Hooded Crane | -5016468.137 | 7267212.486 |
| Hooded Crane | -5739457.061 | 6505105.989 |
| Hooded Crane | -4889087.47  | 6969320.901 |
| Hooded Crane | -4888586.533 | 6969463.352 |
| Hooded Crane | -4894633.407 | 6950633.919 |
| Hooded Crane | -4888693.399 | 6968582.785 |
| Hooded Crane | -4889232.186 | 6969642.807 |
| Hooded Crane | -4888619.928 | 6969459.652 |
| Hooded Crane | -4888504.156 | 6968965.709 |
| Hooded Crane | -4898427.176 | 6951198.705 |
| Hooded Crane | -4888731.248 | 6968588.335 |
| Hooded Crane | -4888708.984 | 6968893.562 |
| Hooded Crane | -5099797.455 | 7210548.032 |
| Hooded Crane | -4888985.056 | 6969816.716 |
| Hooded Crane | -5100140.319 | 7209525.567 |
| Hooded Crane | -5099855.341 | 7209605.68  |
| Hooded Crane | -4895279.06  | 6950818.485 |
| Hooded Crane | -4883868.813 | 6977083.603 |
| Hooded Crane | -5102840.93  | 7205524.745 |
| Hooded Crane | -5100347.374 | 7209079.234 |
| Hooded Crane | -5103054.664 | 7214978.992 |
| Hooded Crane | -4888510.835 | 6969557.704 |
| Hooded Crane | -4888392.837 | 6969568.804 |
| Hooded Crane | -4895882.412 | 6952466.852 |
| Hooded Crane | -5099142.897 | 7210345.817 |
| Hooded Crane | -5101841.281 | 7212984.557 |
| Hooded Crane | -5100287.261 | 7214387.288 |
| Hooded Crane | -5102248.71  | 7212705.95  |
| Hooded Crane | -4894005.565 | 6948472.968 |
| Hooded Crane | -4889232.186 | 6969648.357 |
| Hooded Crane | -4812076.647 | 6737031.22  |
| Hooded Crane | -4888486.345 | 6969772.313 |
| Hooded Crane | -4897187.076 | 6952125.337 |
| Hooded Crane | -4888521.967 | 6968812.167 |
| Hooded Crane | -4888045.52  | 6969554.004 |
| Hooded Crane | -5102914.401 | 7205336.006 |
| Hooded Crane | -5747037.918 | 6508325.143 |
| Hooded Crane | -4888332.724 | 6969578.055 |
| Hooded Crane | -4888368.346 | 6969598.405 |
| Hooded Crane | -4888608.797 | 6969759.363 |
| Hooded Crane | -4888844.794 | 6969572.505 |
| Hooded Crane | -4889107.508 | 6969957.326 |
| Hooded Crane | -4813644.025 | 6734733.263 |
| Hooded Crane | -4888660.003 | 6969502.203 |
| Hooded Crane | -4895911.355 | 6954300.209 |
| Hooded Crane | -4888811.398 | 6969078.554 |
| Hooded Crane | -4898197.857 | 6951076.885 |
| Hooded Crane | -4888377.252 | 6969161.802 |

|              |              |             |
|--------------|--------------|-------------|
| Hooded Crane | -4888352.762 | 6969650.207 |
| Hooded Crane | -4888751.285 | 6969241.351 |
| Hooded Crane | -4899155.205 | 6951420.2   |
| Hooded Crane | -4898082.085 | 6958575.997 |
| Hooded Crane | -4812116.722 | 6737013.25  |
| Hooded Crane | -4891794.76  | 6952180.716 |
| Hooded Crane | -4888236.989 | 6969283.901 |
| Hooded Crane | -4888555.363 | 6969753.812 |
| Hooded Crane | -5100006.736 | 7212114.418 |
| Hooded Crane | -4894637.86  | 6950606.234 |
| Hooded Crane | -4888757.965 | 6970638.21  |
| Hooded Crane | -4891523.141 | 6970477.235 |
| Hooded Crane | -4888515.288 | 6969559.554 |
| Hooded Crane | -4888461.855 | 6969598.405 |
| Hooded Crane | -4888611.023 | 6969470.752 |
| Hooded Crane | -4885019.856 | 6984979.977 |
| Hooded Crane | -4888312.687 | 6969626.156 |
| Hooded Crane | -4812159.023 | 6735737.528 |
| Hooded Crane | -4888746.833 | 6969629.857 |
| Hooded Crane | -4888651.098 | 6969576.205 |
| Hooded Crane | -4888680.041 | 6969535.503 |
| Hooded Crane | -5101142.195 | 7213223.099 |
| Hooded Crane | -4888339.403 | 6969659.458 |
| Hooded Crane | -4897278.358 | 6952396.701 |
| Hooded Crane | -4889005.094 | 6969763.063 |
| Hooded Crane | -4888833.662 | 6969579.905 |
| Hooded Crane | -4888744.606 | 6969433.751 |
| Hooded Crane | -4897017.871 | 6952848.997 |
| Hooded Crane | -4893867.529 | 6950322.011 |
| Hooded Crane | -4888775.776 | 6970105.339 |
| Hooded Crane | -4888357.214 | 6969611.356 |
| Hooded Crane | -4888105.632 | 6969507.753 |
| Hooded Crane | -4888829.209 | 6968945.36  |
| Hooded Crane | -4888326.045 | 6969563.254 |
| Hooded Crane | -4887219.529 | 6989318.741 |
| Hooded Crane | -4888637.74  | 6969544.754 |
| Hooded Crane | -4888871.511 | 6969526.253 |
| Hooded Crane | -4888553.137 | 6968780.719 |
| Hooded Crane | -4895906.902 | 6954303.902 |
| Hooded Crane | -4888504.156 | 6969602.106 |
| Hooded Crane | -4888167.971 | 6969317.201 |
| Hooded Crane | -4897129.19  | 6952273.017 |
| Hooded Crane | -4812081.099 | 6737025.829 |
| Hooded Crane | -4888844.794 | 6969578.055 |
| Hooded Crane | -4812138.986 | 6737043.798 |
| Hooded Crane | -5099581.495 | 7209508.4   |
| Hooded Crane | -4888769.097 | 6969592.855 |
| Hooded Crane | -4902180.869 | 6961780.195 |
| Hooded Crane | -4887822.881 | 6970120.141 |
| Hooded Crane | -4889047.395 | 6969811.166 |
| Hooded Crane | -4899215.318 | 7002995.862 |
| Hooded Crane | -4888617.702 | 6969420.801 |
| Hooded Crane | -4888608.797 | 6969467.052 |
| Hooded Crane | -4888795.813 | 6969609.506 |
| Hooded Crane | -4887998.766 | 6969480.002 |
| Hooded Crane | -4888831.436 | 6969596.555 |
| Hooded Crane | -4888775.776 | 6969642.807 |
| Hooded Crane | -4894640.087 | 6950624.69  |

|              |              |             |
|--------------|--------------|-------------|
| Hooded Crane | -4888833.662 | 6969579.905 |
| Hooded Crane | -4897249.415 | 6952348.704 |
| Hooded Crane | -4810213.158 | 6737534.378 |
| Hooded Crane | -4888528.646 | 6969483.702 |
| Hooded Crane | -5100302.846 | 7214274.679 |
| Hooded Crane | -4896049.391 | 6947111.373 |
| Hooded Crane | -4889245.544 | 6968871.364 |
| Hooded Crane | -4888470.76  | 6968863.964 |
| Hooded Crane | -4888893.774 | 6968814.017 |
| Hooded Crane | -4889056.301 | 6969951.776 |
| Hooded Crane | -5099541.42  | 7209189.861 |
| Hooded Crane | -4888613.249 | 6969476.302 |
| Hooded Crane | -4888680.041 | 6969546.604 |
| Hooded Crane | -4888392.837 | 6970553.096 |
| Hooded Crane | -4888590.985 | 6969454.102 |
| Hooded Crane | -4888637.74  | 6969085.954 |
| Hooded Crane | -4888611.023 | 6969467.052 |
| Hooded Crane | -4889388.033 | 6970035.033 |
| Hooded Crane | -4898289.139 | 6952215.79  |
| Hooded Crane | -4889205.469 | 6970186.748 |
| Hooded Crane | -4888459.628 | 6969631.707 |
| Hooded Crane | -4888642.192 | 6969552.154 |
| Hooded Crane | -4895270.155 | 6953951.229 |
| Hooded Crane | -4898750.002 | 6953755.512 |
| Hooded Crane | -4898177.82  | 6951117.491 |
| Hooded Crane | -4888677.815 | 6969161.802 |
| Hooded Crane | -4888363.894 | 6969574.355 |
| Hooded Crane | -4898353.705 | 6951171.018 |
| Hooded Crane | -4888822.53  | 6968758.521 |
| Hooded Crane | -5741901.637 | 6511078.933 |
| Hooded Crane | -4888261.48  | 6969400.451 |
| Hooded Crane | -4888450.723 | 6970453.181 |
| Hooded Crane | -4897004.513 | 6952596.077 |
| Hooded Crane | -4888319.366 | 6970432.828 |
| Hooded Crane | -4812105.59  | 6737059.971 |
| Hooded Crane | -4898596.381 | 6951065.81  |
| Hooded Crane | -4889091.923 | 6970005.43  |
| Hooded Crane | -4888889.322 | 6969785.264 |
| Hooded Crane | -4888326.045 | 6969642.807 |
| Hooded Crane | -4812150.117 | 6737024.032 |
| Hooded Crane | -5747075.766 | 6508920.903 |
| Hooded Crane | -5100298.393 | 7214320.486 |
| Hooded Crane | -4888506.383 | 6969541.054 |
| Hooded Crane | -4888633.287 | 6969461.502 |
| Hooded Crane | -4887813.975 | 6970195.999 |
| Hooded Crane | -4812535.283 | 6736059.135 |
| Hooded Crane | -4888285.97  | 6969670.558 |
| Hooded Crane | -4889083.018 | 6969988.779 |
| Hooded Crane | -5099383.347 | 7211648.858 |
| Hooded Crane | -4888947.208 | 6969759.363 |
| Hooded Crane | -4888944.981 | 6969777.864 |
| Hooded Crane | -4888301.555 | 6969668.708 |
| Hooded Crane | -4888611.023 | 6969448.552 |
| Hooded Crane | -4888853.699 | 6968900.962 |
| Hooded Crane | -4902412.413 | 6961541.776 |
| Hooded Crane | -4888513.062 | 6969552.154 |
| Hooded Crane | -4894640.087 | 6950615.462 |
| Hooded Crane | -4897469.828 | 6951686.004 |

|              |              |             |
|--------------|--------------|-------------|
| Hooded Crane | -4888326.045 | 6969642.807 |
| Hooded Crane | -4889047.395 | 6969911.072 |
| Hooded Crane | -4888740.154 | 6969750.112 |
| Hooded Crane | -4888481.892 | 6969526.253 |
| Hooded Crane | -4888566.495 | 6969740.862 |
| Hooded Crane | -4889049.622 | 6969894.421 |
| Hooded Crane | -4812094.458 | 6735762.681 |
| Hooded Crane | -4889020.679 | 6970073.886 |
| Hooded Crane | -4888136.802 | 6969507.753 |
| Hooded Crane | -4888292.649 | 6969674.258 |
| Hooded Crane | -4895909.129 | 6946849.413 |
| Hooded Crane | -4889376.901 | 6969811.166 |
| Hooded Crane | -4888624.381 | 6969010.107 |
| Hooded Crane | -4895169.967 | 6951110.108 |
| Hooded Crane | -4888285.97  | 6969681.659 |
| Hooded Crane | -4888112.312 | 6969396.751 |
| Hooded Crane | -4891124.617 | 6970046.134 |
| Hooded Crane | -4888410.648 | 6969267.251 |
| Hooded Crane | -4888599.891 | 6969450.402 |
| Hooded Crane | -4888339.403 | 6969581.755 |
| Hooded Crane | -4898157.782 | 6951115.645 |
| Hooded Crane | -4888811.398 | 6968902.812 |
| Hooded Crane | -4888642.192 | 6968562.437 |
| Hooded Crane | -4888501.93  | 6968780.719 |
| Hooded Crane | -4888811.398 | 6969084.104 |
| Hooded Crane | -4888753.512 | 6969648.357 |
| Hooded Crane | -4888441.817 | 6969483.702 |
| Hooded Crane | -4889708.633 | 6987647.85  |
| Hooded Crane | -4889051.848 | 6969931.424 |
| Hooded Crane | -4888181.33  | 6969302.401 |
| Hooded Crane | -4888156.839 | 6969468.902 |
| Hooded Crane | -4888493.024 | 6969737.161 |
| Hooded Crane | -4898053.142 | 6958158.475 |
| Hooded Crane | -4888675.588 | 6969021.206 |
| Hooded Crane | -4889080.791 | 6970007.28  |
| Hooded Crane | -4892974.747 | 6945111.839 |
| Hooded Crane | -4883879.945 | 6977165.084 |
| Hooded Crane | -4899121.809 | 6951086.113 |
| Hooded Crane | -4888760.191 | 6969646.507 |
| Hooded Crane | -4891529.82  | 6970782.535 |
| Hooded Crane | -4896637.158 | 6955515.295 |
| Hooded Crane | -4888811.398 | 6968928.71  |
| Hooded Crane | -4888281.517 | 6969690.909 |
| Hooded Crane | -4812132.306 | 6737050.986 |
| Hooded Crane | -4888446.27  | 6969591.005 |
| Hooded Crane | -4888782.455 | 6969646.507 |
| Hooded Crane | -4888639.966 | 6968697.475 |
| Hooded Crane | -4898166.688 | 6951111.954 |
| Hooded Crane | -4894631.181 | 6950626.536 |
| Hooded Crane | -4888838.115 | 6969579.905 |
| Hooded Crane | -4888488.571 | 6968814.017 |
| Hooded Crane | -4888544.231 | 6968799.218 |
| Hooded Crane | -4888755.738 | 6969635.407 |
| Hooded Crane | -4888490.798 | 6968991.608 |
| Hooded Crane | -4888644.419 | 6969492.952 |
| Hooded Crane | -4888281.517 | 6969729.761 |
| Hooded Crane | -4891543.178 | 6970717.773 |
| Hooded Crane | -4888321.592 | 6969659.458 |

|              |              |             |
|--------------|--------------|-------------|
| Hooded Crane | -4898876.906 | 6956564.335 |
| Hooded Crane | -4888101.18  | 6969528.103 |
| Hooded Crane | -4888833.662 | 6969600.255 |
| Hooded Crane | -4888784.681 | 6969724.211 |
| Hooded Crane | -4888844.794 | 6969574.355 |
| Hooded Crane | -4888499.703 | 6968812.167 |
| Hooded Crane | -4888435.138 | 6968956.459 |
| Hooded Crane | -4888615.476 | 6969470.752 |
| Hooded Crane | -4897180.397 | 6952276.709 |
| Hooded Crane | -4897189.303 | 6952413.316 |
| Hooded Crane | -4889194.337 | 6970092.388 |
| Hooded Crane | -4888495.251 | 6969507.753 |
| Hooded Crane | -4888613.249 | 6969476.302 |
| Hooded Crane | -4888835.888 | 6969585.455 |
| Hooded Crane | -4901003.109 | 6958110.443 |
| Hooded Crane | -4887709.335 | 6970164.545 |
| Hooded Crane | -4888597.665 | 6969452.252 |
| Hooded Crane | -4888751.285 | 6969642.807 |
| Hooded Crane | -5097136.919 | 7217844.62  |
| Hooded Crane | -4888513.062 | 6969576.205 |
| Hooded Crane | -4888372.799 | 6969603.956 |
| Hooded Crane | -4889080.791 | 6969977.678 |
| Hooded Crane | -4888526.42  | 6969565.104 |
| Hooded Crane | -4888319.366 | 6969672.408 |
| Hooded Crane | -4888586.533 | 6968986.058 |
| Hooded Crane | -4888192.462 | 6969006.407 |
| Hooded Crane | -4888308.234 | 6969668.708 |
| Hooded Crane | -4888390.61  | 6970493.887 |
| Hooded Crane | -4888635.513 | 6969546.604 |
| Hooded Crane | -4888314.913 | 6969824.116 |
| Hooded Crane | -4895085.365 | 6953823.827 |
| Hooded Crane | -4888334.951 | 6969615.056 |
| Hooded Crane | -4896501.348 | 6953081.616 |
| Hooded Crane | -4888840.341 | 6969912.923 |
| Hooded Crane | -4888112.312 | 6969481.852 |
| Hooded Crane | -4888390.61  | 6969541.054 |
| Hooded Crane | -4888352.762 | 6969591.005 |
| Hooded Crane | -4897921.785 | 6952627.461 |
| Hooded Crane | -4898538.495 | 6951230.083 |
| Hooded Crane | -4888766.87  | 6968873.213 |
| Hooded Crane | -4888176.877 | 6969246.901 |
| Hooded Crane | -4888613.249 | 6969470.752 |
| Hooded Crane | -4898082.085 | 6958539.047 |
| Hooded Crane | -4888635.513 | 6969465.202 |
| Hooded Crane | -4888110.085 | 6969457.802 |
| Hooded Crane | -4888441.817 | 6969555.854 |
| Hooded Crane | -4888902.68  | 6969985.078 |
| Hooded Crane | -4888590.985 | 6969461.502 |
| Hooded Crane | -4898847.963 | 6951075.039 |
| Hooded Crane | -4888686.72  | 6969596.555 |
| Hooded Crane | -4888506.383 | 6969579.905 |
| Hooded Crane | -4888319.366 | 6969565.104 |
| Hooded Crane | -4894637.86  | 6950608.08  |
| Hooded Crane | -4888631.06  | 6969063.755 |
| Hooded Crane | -4888350.535 | 6969676.108 |
| Hooded Crane | -4888606.57  | 6969461.502 |
| Hooded Crane | -4884810.576 | 6984746.419 |
| Hooded Crane | -4888065.557 | 6969522.553 |

|              |              |             |
|--------------|--------------|-------------|
| Hooded Crane | -4816184.336 | 6739759.435 |
| Hooded Crane | -4887800.617 | 6970168.246 |
| Hooded Crane | -4888419.553 | 6969598.405 |
| Hooded Crane | -4888132.349 | 6969507.753 |
| Hooded Crane | -4888395.063 | 6968780.719 |
| Hooded Crane | -4888595.438 | 6968937.96  |
| Hooded Crane | -4898175.594 | 6951027.05  |
| Hooded Crane | -4888833.662 | 6969579.905 |
| Hooded Crane | -4888677.815 | 6969409.701 |
| Hooded Crane | -4888484.119 | 6968814.017 |
| Hooded Crane | -4888586.533 | 6969209.901 |
| Hooded Crane | -4812132.306 | 6736971.921 |
| Hooded Crane | -4888617.702 | 6969476.302 |
| Hooded Crane | -4888775.776 | 6969650.207 |
| Hooded Crane | -4898217.895 | 6952160.41  |
| Hooded Crane | -4888294.876 | 6969594.705 |
| Hooded Crane | -4889203.243 | 6969726.061 |
| Hooded Crane | -4888655.551 | 6969389.351 |
| Hooded Crane | -4902392.376 | 6962184.969 |
| Hooded Crane | -4888847.02  | 6968956.459 |
| Hooded Crane | -4899063.923 | 6951527.259 |
| Hooded Crane | -4888606.57  | 6969444.852 |
| Hooded Crane | -4888611.023 | 6969443.002 |
| Hooded Crane | -4895911.355 | 6954300.209 |
| Hooded Crane | -4902216.491 | 6961824.553 |
| Hooded Crane | -4888806.945 | 6968784.419 |
| Hooded Crane | -4888595.438 | 6968950.909 |
| Hooded Crane | -4888751.285 | 6969640.957 |
| Hooded Crane | -4888611.023 | 6969463.352 |
| Hooded Crane | -4898643.135 | 6951158.098 |
| Hooded Crane | -4888664.456 | 6968876.913 |
| Hooded Crane | -4888208.046 | 6969202.502 |
| Hooded Crane | -4898752.229 | 6953735.202 |
| Hooded Crane | -4898876.906 | 6956579.111 |
| Hooded Crane | -4888635.513 | 6969537.354 |
| Hooded Crane | -4888613.249 | 6968976.808 |
| Hooded Crane | -4884953.064 | 6984881.733 |
| Hooded Crane | -4889056.301 | 6969944.375 |
| Hooded Crane | -4888230.31  | 6969801.915 |
| Hooded Crane | -4888230.31  | 6969130.353 |
| Hooded Crane | -4898320.309 | 6951076.885 |
| Hooded Crane | -4812081.099 | 6737033.017 |
| Hooded Crane | -4889606.219 | 6987551.427 |
| Hooded Crane | -4888626.608 | 6969389.351 |
| Hooded Crane | -4889080.791 | 6970788.086 |
| Hooded Crane | -4898124.387 | 6951333.447 |
| Hooded Crane | -4888742.38  | 6969644.657 |
| Hooded Crane | -4888760.191 | 6969692.759 |
| Hooded Crane | -4888746.833 | 6969624.306 |
| Hooded Crane | -4888771.323 | 6969653.908 |
| Hooded Crane | -4894640.087 | 6950602.543 |
| Hooded Crane | -4888533.099 | 6969069.305 |
| Hooded Crane | -4889232.186 | 6969676.108 |
| Hooded Crane | -4888862.605 | 6969505.903 |
| Hooded Crane | -4888815.851 | 6969600.255 |
| Hooded Crane | -4887215.077 | 6989287.212 |
| Hooded Crane | -4888613.249 | 6969463.352 |
| Hooded Crane | -4888323.819 | 6969609.506 |

|              |              |             |
|--------------|--------------|-------------|
| Hooded Crane | -4898810.115 | 6951069.502 |
| Hooded Crane | -4888611.023 | 6969439.301 |
| Hooded Crane | -4888622.155 | 6969672.408 |
| Hooded Crane | -4812132.306 | 6737040.205 |
| Hooded Crane | -4894637.86  | 6950639.455 |
| Hooded Crane | -4888826.983 | 6969598.405 |
| Hooded Crane | -4888786.908 | 6969689.059 |
| Hooded Crane | -4898480.609 | 6952500.081 |
| Hooded Crane | -4888833.662 | 6969570.655 |
| Hooded Crane | -4888851.473 | 6969568.804 |
| Hooded Crane | -4888608.797 | 6969459.652 |
| Hooded Crane | -4888506.383 | 6968945.36  |
| Hooded Crane | -4889201.016 | 6969764.913 |
| Hooded Crane | -4888617.702 | 6969010.107 |
| Hooded Crane | -4895544.001 | 6950822.176 |
| Hooded Crane | -4888749.059 | 6970682.617 |
| Hooded Crane | -4888829.209 | 6969596.555 |
| Hooded Crane | -4810204.253 | 6737608.058 |
| Hooded Crane | -4892386.98  | 6952616.385 |
| Hooded Crane | -4889002.868 | 6968949.059 |
| Hooded Crane | -5099637.155 | 7208913.296 |
| Hooded Crane | -4899219.77  | 6956569.876 |
| Hooded Crane | -4888143.481 | 6969282.051 |
| Hooded Crane | -4888622.155 | 6969446.702 |
| Hooded Crane | -4891534.273 | 6970664.114 |
| Hooded Crane | -4812138.986 | 6737024.032 |
| Hooded Crane | -4888775.776 | 6969642.807 |
| Hooded Crane | -4898905.849 | 6951224.546 |
| Hooded Crane | -4898378.195 | 6951043.661 |
| Hooded Crane | -4888279.291 | 6969657.608 |
| Hooded Crane | -4888624.381 | 6968641.98  |
| Hooded Crane | -4888613.249 | 6969478.152 |
| Hooded Crane | -4898467.251 | 6952450.237 |
| Hooded Crane | -4899155.205 | 6956592.04  |
| Hooded Crane | -4888631.06  | 6969459.652 |
| Hooded Crane | -4888595.438 | 6969446.702 |
| Hooded Crane | -4888145.707 | 6969293.151 |
| Hooded Crane | -4891106.806 | 6969918.473 |
| Hooded Crane | -4888196.914 | 6970464.283 |
| Hooded Crane | -4888613.249 | 6969467.052 |
| Hooded Crane | -4888791.36  | 6969716.81  |
| Hooded Crane | -4888613.249 | 6969470.752 |
| Hooded Crane | -4888671.135 | 6969017.507 |
| Hooded Crane | -4812134.533 | 6737029.423 |
| Hooded Crane | -4888686.72  | 6969422.651 |
| Hooded Crane | -4818651.176 | 6741692.031 |
| Hooded Crane | -4888568.722 | 6969443.002 |
| Hooded Crane | -4888662.23  | 6969394.901 |
| Hooded Crane | -4898872.454 | 6956566.182 |
| Hooded Crane | -4888461.855 | 6968732.623 |
| Hooded Crane | -4902363.433 | 6961554.713 |
| Hooded Crane | -4898153.33  | 6951119.337 |
| Hooded Crane | -4888835.888 | 6969568.804 |
| Hooded Crane | -4888468.534 | 6968791.818 |
| Hooded Crane | -4888611.023 | 6969446.702 |
| Hooded Crane | -4888236.989 | 6969407.851 |
| Hooded Crane | -4888624.381 | 6969015.657 |
| Hooded Crane | -4888504.156 | 6969002.707 |



|              |              |             |
|--------------|--------------|-------------|
| Hooded Crane | -4897238.283 | 6949580.128 |
| Hooded Crane | -4889078.565 | 6969972.127 |
| Hooded Crane | -4889040.716 | 6969898.122 |
| Hooded Crane | -4889049.622 | 6969911.072 |
| Hooded Crane | -4889060.754 | 6969949.925 |
| Hooded Crane | -4889060.754 | 6970865.801 |
| Hooded Crane | -4888829.209 | 6969598.405 |
| Hooded Crane | -4898872.454 | 6956562.487 |
| Hooded Crane | -4888145.707 | 6969529.953 |
| Hooded Crane | -4888691.173 | 6969433.751 |
| Hooded Crane | -4809834.672 | 6738156.182 |
| Hooded Crane | -4888824.756 | 6969596.555 |
| Hooded Crane | -4889176.526 | 6969535.503 |
| Hooded Crane | -4888277.064 | 6969546.604 |
| Hooded Crane | -4888842.567 | 6969581.755 |
| Hooded Crane | -4888740.154 | 6969485.552 |
| Hooded Crane | -4888611.023 | 6969468.902 |
| Hooded Crane | -4898752.229 | 6953744.433 |
| Hooded Crane | -4888838.115 | 6969576.205 |
| Hooded Crane | -4888809.172 | 6968947.21  |
| Hooded Crane | -4888504.156 | 6969566.954 |
| Hooded Crane | -4898754.455 | 6953737.048 |
| Hooded Crane | -4894631.181 | 6950639.455 |
| Hooded Crane | -4897151.454 | 6952369.011 |
| Hooded Crane | -4889205.469 | 6968769.62  |
| Hooded Crane | -4886934.551 | 6950098.701 |
| Hooded Crane | -4888584.306 | 6969455.952 |
| Hooded Crane | -4889067.433 | 6969994.329 |
| Hooded Crane | -4889078.565 | 6969998.029 |
| Hooded Crane | -4888575.401 | 6969452.252 |
| Hooded Crane | -4889089.697 | 6969996.179 |
| Hooded Crane | -5747093.578 | 6508906.926 |
| Hooded Crane | -4898164.462 | 6951126.72  |
| Hooded Crane | -4888824.756 | 6969603.956 |
| Hooded Crane | -4898079.859 | 6951135.949 |
| Hooded Crane | -4888584.306 | 6968987.908 |
| Hooded Crane | -4812132.306 | 6737040.205 |
| Hooded Crane | -4891200.314 | 6987644.141 |
| Hooded Crane | -4888452.949 | 6969322.751 |
| Hooded Crane | -4888294.876 | 6969642.807 |
| Hooded Crane | -4898571.891 | 6950423.518 |
| Hooded Crane | -5747064.635 | 6508887.707 |
| Hooded Crane | -4888880.416 | 6969518.853 |
| Hooded Crane | -4898830.152 | 6956592.04  |
| Hooded Crane | -4888746.833 | 6969637.257 |
| Hooded Crane | -4888757.965 | 6969644.657 |
| Hooded Crane | -4888515.288 | 6969491.102 |
| Hooded Crane | -4898173.367 | 6951121.183 |
| Hooded Crane | -4884955.291 | 6984848.368 |
| Hooded Crane | -5747387.461 | 6508795.108 |
| Hooded Crane | -4888435.138 | 6969289.451 |
| Hooded Crane | -4889294.525 | 6970192.298 |
| Hooded Crane | -4888864.831 | 6968610.533 |
| Hooded Crane | -4888611.023 | 6969446.702 |
| Hooded Crane | -4888375.026 | 6987948.25  |
| Hooded Crane | -4898847.963 | 6951076.885 |
| Hooded Crane | -4888613.249 | 6969439.301 |
| Hooded Crane | -4888813.624 | 6968895.412 |

|              |              |             |
|--------------|--------------|-------------|
| Hooded Crane | -4888780.229 | 6969648.357 |
| Hooded Crane | -4888849.247 | 6969565.104 |
| Hooded Crane | -4888590.985 | 6968949.059 |
| Hooded Crane | -4898830.152 | 6951231.929 |
| Hooded Crane | -4898518.458 | 6952453.929 |
| Hooded Crane | -4888472.987 | 6969531.803 |
| Hooded Crane | -4888733.474 | 6969609.506 |
| Hooded Crane | -4888757.965 | 6969648.357 |
| Hooded Crane | -4898088.764 | 6951089.805 |
| Hooded Crane | -4888778.002 | 6970123.841 |
| Hooded Crane | -5747040.144 | 6509411.871 |
| Hooded Crane | -4888606.57  | 6968949.059 |
| Hooded Crane | -4898131.066 | 6951060.273 |
| Hooded Crane | -4888936.076 | 6969670.558 |
| Hooded Crane | -4888631.06  | 6969468.902 |
| Hooded Crane | -4888134.575 | 6969504.053 |
| Hooded Crane | -4888753.512 | 6969628.007 |
| Hooded Crane | -4889203.243 | 6969755.662 |
| Hooded Crane | -4888833.662 | 6969578.055 |
| Hooded Crane | -4884692.577 | 6984646.325 |
| Hooded Crane | -4888508.609 | 6969583.605 |
| Hooded Crane | -4898763.36  | 6953744.433 |
| Hooded Crane | -4898151.103 | 6951117.491 |
| Hooded Crane | -4888793.587 | 6969613.206 |
| Hooded Crane | -4888615.476 | 6969450.402 |
| Hooded Crane | -4888599.891 | 6988074.348 |
| Hooded Crane | -5099715.079 | 7209453.084 |
| Hooded Crane | -4888517.515 | 6969648.357 |
| Hooded Crane | -4889209.922 | 6969777.864 |
| Hooded Crane | -4888562.042 | 6969293.151 |
| Hooded Crane | -4891520.914 | 6970701.121 |
| Hooded Crane | -4888688.947 | 6969261.701 |
| Hooded Crane | -5719622.154 | 6550547.9   |
| Hooded Crane | -4889236.638 | 6969653.908 |
| Hooded Crane | -4898754.455 | 6953737.048 |
| Hooded Crane | -4899736.293 | 6953137.002 |
| Hooded Crane | -4888809.172 | 6969596.555 |
| Hooded Crane | -4898876.906 | 6956577.264 |
| Hooded Crane | -4889069.659 | 6970001.73  |
| Hooded Crane | -4888831.436 | 6969587.305 |
| Hooded Crane | -4889083.018 | 6970005.43  |
| Hooded Crane | -4889196.563 | 6969763.063 |
| Hooded Crane | -5101787.848 | 7212513.22  |
| Hooded Crane | -4899090.64  | 6952197.33  |
| Hooded Crane | -4888847.02  | 6969583.605 |
| Hooded Crane | -4899157.431 | 6951420.2   |
| Hooded Crane | -4884690.35  | 6984651.885 |
| Hooded Crane | -4889078.565 | 6969981.378 |
| Hooded Crane | -4891380.652 | 6970290.36  |
| Hooded Crane | -4898168.914 | 6951121.183 |
| Hooded Crane | -4888590.985 | 6969448.552 |
| Hooded Crane | -4899208.638 | 6951521.721 |
| Hooded Crane | -4884690.35  | 6984638.91  |
| Hooded Crane | -4888254.801 | 6968980.508 |
| Hooded Crane | -4900125.911 | 6998677.438 |
| Hooded Crane | -4891024.429 | 6970717.773 |
| Hooded Crane | -5748525.146 | 6510900.677 |
| Hooded Crane | -4887842.918 | 6970281.109 |

|              |              |             |
|--------------|--------------|-------------|
| Hooded Crane | -4888735.701 | 6969622.456 |
| Hooded Crane | -4888615.476 | 6969463.352 |
| Hooded Crane | -4899135.168 | 6951104.571 |
| Hooded Crane | -4888499.703 | 6968814.017 |
| Hooded Crane | -4888613.249 | 6969454.102 |
| Hooded Crane | -4885151.213 | 6984705.639 |
| Hooded Crane | -4889775.425 | 6972125.997 |
| Hooded Crane | -4884690.35  | 6984638.91  |
| Hooded Crane | -4890875.261 | 6970965.721 |
| Hooded Crane | -4895904.676 | 6954302.055 |
| Hooded Crane | -4898872.454 | 6956580.958 |
| Hooded Crane | -4888622.155 | 6968643.83  |
| Hooded Crane | -4887638.091 | 6970158.995 |
| Hooded Crane | -4898792.304 | 6951128.566 |
| Hooded Crane | -4889701.954 | 6987455.006 |
| Hooded Crane | -4899607.162 | 6953122.233 |
| Hooded Crane | -4898819.02  | 6951076.885 |
| Hooded Crane | -4901762.308 | 6961358.808 |
| Hooded Crane | -4889980.253 | 6987351.169 |
| Hooded Crane | -4889984.705 | 6987419.775 |
| Hooded Crane | -4888740.154 | 6969722.361 |
| Hooded Crane | -4898010.841 | 6950956.912 |
| Hooded Crane | -4898814.567 | 6951062.119 |
| Hooded Crane | -4888829.209 | 6969568.804 |
| Hooded Crane | -5748607.523 | 6511000.29  |
| Hooded Crane | -4888606.57  | 6969468.902 |
| Hooded Crane | -4898807.888 | 6951063.964 |
| Hooded Crane | -4885186.835 | 6984720.468 |
| Hooded Crane | -4898204.537 | 6950984.598 |
| Hooded Crane | -4888684.494 | 6969570.655 |
| Hooded Crane | -4888584.306 | 6969457.802 |
| Hooded Crane | -4898756.681 | 6953733.355 |
| Hooded Crane | -4885077.742 | 6984683.396 |
| Hooded Crane | -5103152.625 | 7215402.756 |
| Hooded Crane | -4898870.227 | 6956575.417 |
| Hooded Crane | -4888593.212 | 6969444.852 |
| Hooded Crane | -4888749.059 | 6969670.558 |
| Hooded Crane | -4888452.949 | 6969330.151 |
| Hooded Crane | -4888784.681 | 6969666.858 |
| Hooded Crane | -4812123.401 | 6737094.113 |
| Hooded Crane | -4888441.817 | 6969328.301 |
| Hooded Crane | -4884957.517 | 6984739.004 |
| Hooded Crane | -4890071.535 | 6987694.207 |
| Hooded Crane | -4897126.964 | 6952276.709 |
| Hooded Crane | -4898750.002 | 6953744.433 |
| Hooded Crane | -4898725.512 | 6951191.322 |
| Hooded Crane | -4888829.209 | 6969574.355 |
| Hooded Crane | -4883993.49  | 7098610.347 |
| Hooded Crane | -4889986.932 | 6987419.775 |
| Hooded Crane | -4887807.296 | 6970140.493 |
| Hooded Crane | -4902514.827 | 6962072.222 |
| Hooded Crane | -4899159.658 | 6951429.43  |
| Hooded Crane | -4888579.853 | 6968950.909 |
| Hooded Crane | -4899099.545 | 6951547.563 |
| Hooded Crane | -4899164.111 | 6951436.813 |
| Hooded Crane | -4888611.023 | 6969147.003 |
| Hooded Crane | -4901751.176 | 6961345.871 |
| Hooded Crane | -5747251.651 | 6509174.246 |

|              |              |             |
|--------------|--------------|-------------|
| Hooded Crane | -4898752.229 | 6953746.28  |
| Hooded Crane | -4888301.555 | 6969631.707 |
| Hooded Crane | -4902396.829 | 6961554.713 |
| Hooded Crane | -4889984.705 | 6987419.775 |
| Hooded Crane | -4888973.924 | 6969798.215 |
| Hooded Crane | -4899150.752 | 6951423.892 |
| Hooded Crane | -4812096.684 | 6737034.814 |
| Hooded Crane | -4902125.209 | 6961741.382 |
| Hooded Crane | -5100282.808 | 7214402.558 |
| Hooded Crane | -4884697.03  | 6984646.325 |
| Hooded Crane | -4884688.124 | 6984637.057 |
| Hooded Crane | -5734852.886 | 6511196.024 |
| Hooded Crane | -4902363.433 | 6961543.624 |
| Hooded Crane | -4887651.449 | 6970205.25  |
| Hooded Crane | -4899157.431 | 6951429.43  |
| Hooded Crane | -4812118.948 | 6737040.205 |
| Hooded Crane | -4888450.723 | 6969326.451 |
| Hooded Crane | -4902957.879 | 6961889.242 |
| Hooded Crane | -4898830.152 | 6951302.069 |
| Hooded Crane | -4888495.251 | 6969565.104 |
| Hooded Crane | -4888321.592 | 6968987.908 |
| Hooded Crane | -5738388.393 | 6505741.685 |
| Hooded Crane | -4889984.705 | 6987412.358 |
| Hooded Crane | -5747810.475 | 6509768.321 |
| Hooded Crane | -5720546.105 | 6552674.786 |
| Hooded Crane | -4898229.027 | 6966731.325 |
| Hooded Crane | -4888562.042 | 6969450.402 |
| Hooded Crane | -4900112.553 | 6998675.581 |
| Hooded Crane | -4897160.36  | 6952444.699 |
| Hooded Crane | -4818746.91  | 6741857.447 |
| Hooded Crane | -4818241.52  | 6743008.26  |
| Hooded Crane | -5747244.972 | 6510082.848 |
| Hooded Crane | -4899763.01  | 7003395.319 |
| Hooded Crane | -4888524.194 | 6969517.003 |
| Hooded Crane | -5747763.721 | 6545284.879 |
| Hooded Crane | -4899776.368 | 6998408.195 |
| Hooded Crane | -5747592.289 | 6508506.836 |
| Hooded Crane | -5103413.112 | 7215477.204 |
| Hooded Crane | -5739514.947 | 6503443.633 |
| Hooded Crane | -4888450.723 | 6969278.351 |
| Hooded Crane | -5739376.91  | 6504908.654 |
| Hooded Crane | -4902245.434 | 6961798.677 |
| Hooded Crane | -4889982.479 | 6987414.213 |
| Hooded Crane | -4899270.977 | 7003036.735 |
| Hooded Crane | -4900117.005 | 6998670.011 |
| Hooded Crane | -5747035.691 | 6508889.454 |
| Hooded Crane | -4888713.437 | 6969492.952 |
| Hooded Crane | -4899157.431 | 6951427.584 |
| Hooded Crane | -4889628.483 | 6987384.545 |
| Hooded Crane | -4888441.817 | 6969500.353 |
| Hooded Crane | -4889120.866 | 6968617.932 |
| Hooded Crane | -4887800.617 | 6970168.246 |
| Hooded Crane | -5747180.407 | 6508540.031 |
| Hooded Crane | -4888608.797 | 6969470.752 |
| Hooded Crane | -4903149.348 | 6962092.553 |
| Hooded Crane | -4897438.659 | 6995853.63  |
| Hooded Crane | -5748752.238 | 6511096.409 |
| Hooded Crane | -5746349.963 | 6510643.786 |

|              |              |             |
|--------------|--------------|-------------|
| Hooded Crane | -5747017.88  | 6508898.19  |
| Hooded Crane | -5746298.756 | 6509939.562 |
| Hooded Crane | -4902227.623 | 6961820.856 |
| Hooded Crane | -5101131.063 | 7214289.948 |
| Hooded Crane | -4898843.511 | 6951087.959 |
| Hooded Crane | -5747037.918 | 6509429.343 |
| Hooded Crane | -5750021.28  | 6511858.41  |
| Hooded Crane | -5752815.399 | 6513298.714 |
| Hooded Crane | -4888321.592 | 6969291.301 |
| Hooded Crane | -4810598.324 | 6737298.968 |
| Hooded Crane | -5747029.012 | 6508903.432 |
| Hooded Crane | -4901782.345 | 7002707.893 |
| Hooded Crane | -4898068.727 | 6951123.028 |
| Hooded Crane | -5747380.782 | 6508478.883 |
| Hooded Crane | -5742008.503 | 6511042.233 |
| Hooded Crane | -4899462.447 | 7003070.178 |
| Hooded Crane | -5719595.437 | 6550509.266 |
| Hooded Crane | -5746868.712 | 6509649.502 |
| Hooded Crane | -5751281.417 | 6510563.4   |
| Hooded Crane | -5746817.505 | 6509574.368 |
| Hooded Crane | -4889982.479 | 6987403.087 |
| Hooded Crane | -5747728.099 | 6509750.847 |
| Hooded Crane | -5746358.869 | 6509916.846 |
| Hooded Crane | -5746470.188 | 6510432.338 |
| Hooded Crane | -4812272.569 | 6736262.167 |
| Hooded Crane | -5746118.419 | 6509745.605 |
| Hooded Crane | -4888749.059 | 6969653.908 |
| Hooded Crane | -4902149.699 | 6961785.739 |
| Hooded Crane | -5746993.39  | 6510096.828 |
| Hooded Crane | -4813908.965 | 6737099.504 |
| Hooded Crane | -4888501.93  | 6969600.255 |
| Hooded Crane | -5747819.381 | 6509846.952 |
| Hooded Crane | -5747037.918 | 6508875.477 |
| Hooded Crane | -5748560.768 | 6511106.895 |
| Hooded Crane | -5746877.618 | 6509642.513 |
| Hooded Crane | -5747719.193 | 6509881.899 |
| Hooded Crane | -5747035.691 | 6508903.432 |
| Hooded Crane | -5747385.235 | 6508475.389 |
| Hooded Crane | -5016672.965 | 7268282.924 |
| Hooded Crane | -5747901.757 | 6509944.804 |
| Hooded Crane | -5747057.955 | 6509908.109 |
| Hooded Crane | -4812096.684 | 6737104.895 |
| Hooded Crane | -5747750.363 | 6510400.883 |
| Hooded Crane | -5747325.122 | 6509037.964 |
| Hooded Crane | -5747944.058 | 6510173.714 |
| Hooded Crane | -5747051.276 | 6510102.07  |
| Hooded Crane | -5726147.702 | 6554758.301 |
| Hooded Crane | -5747387.461 | 6508520.813 |
| Hooded Crane | -5747425.31  | 6510642.039 |
| Hooded Crane | -5747763.721 | 6510669.999 |
| Hooded Crane | -5747040.144 | 6508891.202 |
| Hooded Crane | -5747378.555 | 6508484.124 |
| Hooded Crane | -5099875.379 | 7210450.739 |
| Hooded Crane | -5747725.872 | 6509770.068 |
| Hooded Crane | -4884692.577 | 6984646.325 |
| Hooded Crane | -5751297.002 | 6510542.43  |
| Hooded Crane | -4900965.26  | 7001634.143 |
| Hooded Crane | -5747213.803 | 6509909.857 |

|              |              |             |
|--------------|--------------|-------------|
| Hooded Crane | -4812096.684 | 6736982.703 |
| Hooded Crane | -4812366.077 | 6736308.883 |
| Hooded Crane | -5103499.942 | 7211820.578 |
| Hooded Crane | -5739359.099 | 6504892.937 |
| Hooded Crane | -5100358.506 | 7207953.979 |
| Hooded Crane | -5725851.592 | 6554361.232 |
| Hooded Crane | -5747169.275 | 6508520.813 |
| Hooded Crane | -5748518.467 | 6510465.54  |
| Hooded Crane | -5747374.103 | 6508480.63  |
| Hooded Crane | -5725994.081 | 6554742.488 |
| Hooded Crane | -5747656.854 | 6510404.378 |
| Hooded Crane | -5747298.405 | 6510374.671 |
| Hooded Crane | -5747269.462 | 6508569.731 |
| Hooded Crane | -5747180.407 | 6508541.778 |
| Hooded Crane | -5741830.392 | 6510556.41  |
| Hooded Crane | -5747022.333 | 6508875.477 |
| Hooded Crane | -5747033.465 | 6509397.892 |
| Hooded Crane | -5748436.091 | 6511056.214 |
| Hooded Crane | -5739359.099 | 6504915.639 |
| Hooded Crane | -5740450.03  | 6504484.312 |
| Hooded Crane | -5747478.743 | 6510491.753 |
| Hooded Crane | -5746663.884 | 6508494.607 |
| Hooded Crane | -5747024.559 | 6508882.466 |
| Hooded Crane | -5746726.223 | 6508973.318 |
| Hooded Crane | -5739136.46  | 6503967.449 |
| Hooded Crane | -5747044.597 | 6508892.949 |
| Hooded Crane | -5734988.696 | 6511045.728 |
| Hooded Crane | -5747024.559 | 6508891.202 |
| Hooded Crane | -5751303.681 | 6510538.935 |
| Hooded Crane | -5747031.239 | 6508880.719 |
| Hooded Crane | -4897587.827 | 6996072.666 |
| Hooded Crane | -5747135.879 | 6509866.173 |
| Hooded Crane | -4900103.647 | 6998696.007 |
| Hooded Crane | -5747509.912 | 6508784.626 |
| Hooded Crane | -5747040.144 | 6508891.202 |
| Hooded Crane | -5747031.239 | 6508884.213 |
| Hooded Crane | -5741837.071 | 6510558.158 |
| Hooded Crane | -5751470.66  | 6510556.41  |
| Hooded Crane | -5746056.08  | 6509646.008 |
| Hooded Crane | -5739147.592 | 6503920.304 |
| Hooded Crane | -5749707.359 | 6504582.101 |
| Hooded Crane | -4812651.055 | 6735784.241 |
| Hooded Crane | -4899366.712 | 7003226.244 |
| Hooded Crane | -4887778.353 | 6970155.294 |
| Hooded Crane | -5747779.306 | 6509883.646 |
| Hooded Crane | -5747142.558 | 6509632.029 |
| Hooded Crane | -4884156.017 | 7098482.468 |
| Hooded Crane | -5747387.461 | 6508470.148 |
| Hooded Crane | -5747031.239 | 6508878.971 |
| Hooded Crane | -5747819.381 | 6509845.204 |
| Hooded Crane | -5739100.838 | 6504000.625 |
| Hooded Crane | -5747184.86  | 6508538.284 |
| Hooded Crane | -5738947.217 | 6490238.836 |
| Hooded Crane | -5745063.11  | 6510180.704 |
| Hooded Crane | -5747033.465 | 6508887.707 |
| Hooded Crane | -5751294.775 | 6510551.168 |
| Hooded Crane | -5734950.848 | 6511229.23  |
| Hooded Crane | -4900103.647 | 6998690.436 |

|              |              |             |
|--------------|--------------|-------------|
| Hooded Crane | -5725987.402 | 6554747.759 |
| Hooded Crane | -5747485.422 | 6510362.439 |
| Hooded Crane | -4889218.827 | 6970129.392 |
| Hooded Crane | -5748050.925 | 6510636.796 |
| Hooded Crane | -5738566.505 | 6489044.841 |
| Hooded Crane | -5747055.729 | 6508891.202 |
| Hooded Crane | -5745989.288 | 6509780.552 |
| Hooded Crane | -5747443.121 | 6509518.454 |
| Hooded Crane | -4814213.981 | 6734514.102 |
| Hooded Crane | -5747035.691 | 6508898.19  |
| Hooded Crane | -5725882.762 | 6554348.934 |
| Hooded Crane | -5747026.786 | 6508877.224 |
| Hooded Crane | -5751292.549 | 6510552.915 |
| Hooded Crane | -4899219.77  | 7002999.577 |
| Hooded Crane | -5747158.143 | 6508484.124 |
| Hooded Crane | -5725807.065 | 6554540.438 |
| Hooded Crane | -4900103.647 | 6998688.579 |
| Hooded Crane | -5725994.081 | 6554746.002 |
| Hooded Crane | -5747189.312 | 6508531.295 |
| Hooded Crane | -5747031.239 | 6508891.202 |
| Hooded Crane | -4812713.394 | 6736835.356 |
| Hooded Crane | -5748024.209 | 6510565.148 |
| Hooded Crane | -5747040.144 | 6508887.707 |
| Hooded Crane | -5719602.116 | 6550532.095 |
| Hooded Crane | -5747022.333 | 6509443.321 |
| Hooded Crane | -5747182.633 | 6508543.525 |
| Hooded Crane | -5747040.144 | 6508887.707 |
| Hooded Crane | -5748640.919 | 6509979.752 |
| Hooded Crane | -5739385.816 | 6504934.849 |
| Hooded Crane | -5747033.465 | 6508894.696 |
| Hooded Crane | -5099369.988 | 7210084.472 |
| Hooded Crane | -5747487.649 | 6510098.575 |
| Hooded Crane | -5727501.347 | 6500088.518 |
| Hooded Crane | -5738775.785 | 6489412.608 |
| Hooded Crane | -5747035.691 | 6508882.466 |
| Hooded Crane | -5735075.525 | 6511229.23  |
| Hooded Crane | -5751455.075 | 6510573.885 |
| Hooded Crane | -5747184.86  | 6508541.778 |
| Hooded Crane | -5747031.239 | 6508875.477 |
| Hooded Crane | -5747383.008 | 6508482.377 |
| Hooded Crane | -5747216.029 | 6508538.284 |
| Hooded Crane | -5744087.951 | 6505097.257 |
| Hooded Crane | -5735358.277 | 6510893.687 |
| Hooded Crane | -5739430.344 | 6503424.427 |
| Hooded Crane | -5747037.918 | 6508884.213 |
| Hooded Crane | -5747249.425 | 6508377.554 |
| Hooded Crane | -5747182.633 | 6508545.272 |
| Hooded Crane | -5725978.497 | 6554067.836 |
| Hooded Crane | -5747102.483 | 6509499.234 |
| Hooded Crane | -5747581.157 | 6508964.582 |
| Hooded Crane | -5748718.842 | 6509499.234 |
| Hooded Crane | -5747035.691 | 6508884.213 |
| Hooded Crane | -5740572.482 | 6504529.714 |
| Hooded Crane | -5747389.687 | 6508457.918 |
| Hooded Crane | -5749246.497 | 6511302.632 |
| Hooded Crane | -5747031.239 | 6508889.454 |
| Hooded Crane | -5718395.413 | 6550477.657 |
| Hooded Crane | -5739374.684 | 6504945.327 |

|              |              |             |
|--------------|--------------|-------------|
| Hooded Crane | -5745238.995 | 6510315.257 |
| Hooded Crane | -5747193.765 | 6508543.525 |
| Hooded Crane | -5747287.273 | 6508625.638 |
| Hooded Crane | -5739152.045 | 6503943.003 |
| Hooded Crane | -5747040.144 | 6508885.96  |
| Hooded Crane | -5725867.177 | 6554322.581 |
| Hooded Crane | -5747104.71  | 6510683.98  |
| Hooded Crane | -5744203.724 | 6508938.375 |
| Hooded Crane | -5746859.807 | 6509635.524 |
| Hooded Crane | -5747031.239 | 6508889.454 |
| Hooded Crane | -5739432.57  | 6510682.232 |
| Hooded Crane | -5747730.325 | 6510378.166 |
| Hooded Crane | -5747020.107 | 6509885.394 |
| Hooded Crane | -5718675.938 | 6550653.265 |
| Hooded Crane | -5747679.118 | 6509700.175 |
| Hooded Crane | -5727761.835 | 6500395.693 |
| Hooded Crane | -5739198.799 | 6503340.62  |
| Hooded Crane | -4883626.136 | 7090526.075 |
| Hooded Crane | -4888165.745 | 6969417.101 |
| Hooded Crane | -5739372.458 | 6504926.117 |
| Hooded Crane | -4901989.399 | 7006377.953 |
| Hooded Crane | -5747721.42  | 6510337.974 |
| Hooded Crane | -5747801.57  | 6510589.613 |
| Hooded Crane | -4898932.566 | 6956641.91  |
| Hooded Crane | -5738375.035 | 6505743.431 |
| Hooded Crane | -5746973.353 | 6508894.696 |
| Hooded Crane | -5747035.691 | 6508894.696 |
| Hooded Crane | -5747917.342 | 6509960.531 |
| Hooded Crane | -5734265.119 | 6503368.556 |
| Hooded Crane | -5746309.888 | 6509953.541 |
| Hooded Crane | -5720848.894 | 6482636.838 |
| Hooded Crane | -5751508.509 | 6510376.419 |
| Hooded Crane | -5747198.218 | 6508636.121 |
| Hooded Crane | -5747035.691 | 6508903.432 |
| Hooded Crane | -5738363.903 | 6505753.91  |
| Hooded Crane | -5747843.871 | 6509728.132 |
| Hooded Crane | -5721514.585 | 6483673.139 |
| Hooded Crane | -5739356.873 | 6504919.132 |
| Hooded Crane | -5721505.679 | 6483685.331 |
| Hooded Crane | -5739336.835 | 6504891.191 |
| Hooded Crane | -5721512.359 | 6483687.073 |
| Hooded Crane | -5734855.113 | 6511241.463 |
| Hooded Crane | -5744767     | 6506531.134 |
| Hooded Crane | -4880787.489 | 7101416.696 |
| Hooded Crane | -5718395.413 | 6550470.633 |
| Hooded Crane | -5747040.144 | 6508899.937 |
| Hooded Crane | -4888642.192 | 6969047.105 |
| Hooded Crane | -5747051.276 | 6509452.058 |
| Hooded Crane | -5747247.198 | 6508653.592 |
| Hooded Crane | -5747318.443 | 6508560.996 |
| Hooded Crane | -5721507.906 | 6483706.233 |
| Hooded Crane | -5747610.1   | 6509099.116 |
| Hooded Crane | -5747730.325 | 6509792.784 |
| Hooded Crane | -5721521.264 | 6483685.331 |
| Hooded Crane | -5742391.442 | 6547930.009 |
| Hooded Crane | -5747022.333 | 6508898.19  |
| Hooded Crane | -5739336.835 | 6504906.908 |
| Hooded Crane | -5741616.659 | 6504386.525 |



|              |              |             |
|--------------|--------------|-------------|
| Hooded Crane | -4812167.929 | 6737024.032 |
| Hooded Crane | -5721859.675 | 6478811.495 |
| Hooded Crane | -5734986.47  | 6511028.252 |
| Hooded Crane | -5747846.097 | 6510958.348 |
| Hooded Crane | -5734213.912 | 6503578.076 |
| Hooded Crane | -5747652.401 | 6510224.39  |
| Hooded Crane | -5720748.707 | 6481257.629 |
| Hooded Crane | -4887825.107 | 6970244.104 |
| Hooded Crane | -4901666.573 | 7005998.79  |
| Hooded Crane | -5477800.597 | 6840510.607 |
| Hooded Crane | -4881780.459 | 7054721.622 |
| Hooded Crane | -5744295.006 | 6506272.633 |
| Hooded Crane | -5747026.786 | 6508892.949 |
| Hooded Crane | -5713789.012 | 6493490.522 |
| Hooded Crane | -5721623.678 | 6480098.018 |
| Hooded Crane | -5720717.537 | 6478684.421 |
| Hooded Crane | -4887704.882 | 7037686.417 |
| Hooded Crane | -5720579.501 | 6478687.902 |
| Hooded Crane | -5722405.141 | 6478277.099 |
| Hooded Crane | -4887393.188 | 7034462.488 |
| Hooded Crane | -5721505.679 | 6483690.557 |
| Hooded Crane | -5722365.066 | 6480205.963 |
| Hooded Crane | -5714189.762 | 6500179.273 |
| Hooded Crane | -5099895.416 | 7210397.324 |
| Hooded Crane | -4898814.567 | 7022732.769 |
| Hooded Crane | -4812637.697 | 6736749.105 |
| Hooded Crane | -5099786.323 | 7209517.937 |
| Hooded Crane | -4899927.762 | 7018494.754 |
| Hooded Crane | -4881845.024 | 7094462.852 |
| Hooded Crane | -5720715.311 | 6481628.53  |
| Hooded Crane | -4884204.997 | 7098574.616 |
| Hooded Crane | -4883098.482 | 7090343.847 |
| Hooded Crane | -4893019.275 | 6950229.734 |
| Hooded Crane | -5710447.201 | 6498941.949 |
| Hooded Crane | -4811978.685 | 6736817.387 |
| Hooded Crane | -4897171.492 | 6952385.625 |
| Hooded Crane | -4889047.395 | 6969948.075 |
| Hooded Crane | -5722247.067 | 6477977.713 |
| Hooded Crane | -5712312.916 | 6498535.365 |
| Hooded Crane | -4885391.663 | 7098104.484 |
| Hooded Crane | -4882613.129 | 7096921.755 |
| Hooded Crane | -5101761.131 | 7212358.658 |
| Hooded Crane | -4812130.08  | 6736971.921 |
| Hooded Crane | -4882719.995 | 7053646.375 |
| Hooded Crane | -5710460.56  | 6498997.79  |
| Hooded Crane | -5710438.296 | 6498931.479 |
| Hooded Crane | -5710460.56  | 6498940.204 |
| Hooded Crane | -4882606.45  | 7097122.938 |
| Hooded Crane | -4812114.495 | 6736975.515 |
| Hooded Crane | -4880498.058 | 7100927.582 |
| Hooded Crane | -5710444.975 | 6498929.734 |
| Hooded Crane | -5710427.164 | 6498945.439 |
| Hooded Crane | -4881996.419 | 7096906.714 |
| Hooded Crane | -5675421.637 | 6527838.297 |
| Hooded Crane | -4882103.285 | 7096807.064 |
| Hooded Crane | -5710458.333 | 6498940.204 |
| Hooded Crane | -5712039.07  | 6497642     |
| Hooded Crane | -4883833.19  | 7098584.019 |

|              |              |             |
|--------------|--------------|-------------|
| Hooded Crane | -4884095.904 | 7098593.422 |
| Hooded Crane | -4812123.401 | 6736989.89  |
| Hooded Crane | -4883842.096 | 7092666.159 |
| Hooded Crane | -5744419.683 | 6506345.991 |
| Hooded Crane | -4883203.122 | 7090388.934 |
| Hooded Crane | -4882098.833 | 7095953.517 |
| Hooded Crane | -5705947.667 | 6501024.042 |
| Hooded Crane | -4884454.353 | 7098978.953 |
| Hooded Crane | -4883147.462 | 7090291.246 |
| Hooded Crane | -4882644.298 | 7094186.555 |
| Hooded Crane | -4883252.103 | 7090417.113 |
| Hooded Crane | -4812130.08  | 6737203.728 |
| Hooded Crane | -4882791.24  | 7090159.745 |
| Hooded Crane | -4881580.084 | 7094101.977 |
| Hooded Crane | -4882746.712 | 7097184.986 |
| Hooded Crane | -4880691.754 | 7101313.227 |
| Hooded Crane | -4894562.163 | 7063643.421 |
| Hooded Crane | -4882608.676 | 7097134.22  |
| Hooded Crane | -4883855.454 | 7090604.979 |
| Hooded Crane | -5721552.434 | 6483662.688 |
| Hooded Crane | -4882898.107 | 7090189.802 |
| Hooded Crane | -4883822.058 | 7093402.829 |
| Hooded Crane | -4882606.45  | 7097134.22  |
| Hooded Crane | -4884367.524 | 7092474.486 |
| Hooded Crane | -4811996.497 | 6736964.733 |
| Hooded Crane | -4881575.631 | 7094126.411 |
| Hooded Crane | -4882802.372 | 7096996.963 |
| Hooded Crane | -4883096.255 | 7097248.915 |
| Hooded Crane | -4881522.198 | 7094103.856 |
| Hooded Crane | -4883989.038 | 7098862.351 |
| Hooded Crane | -4881575.631 | 7094111.374 |
| Hooded Crane | -5710578.558 | 6498575.499 |
| Hooded Crane | -4883073.991 | 7090388.934 |
| Hooded Crane | -4881339.634 | 7101053.62  |
| Hooded Crane | -4883955.642 | 7098694.975 |
| Hooded Crane | -4882608.676 | 7097115.417 |
| Hooded Crane | -5710444.975 | 6498957.654 |
| Hooded Crane | -4881043.524 | 7101128.867 |
| Hooded Crane | -4882546.337 | 7097141.74  |
| Hooded Crane | -4882584.186 | 7097224.472 |
| Hooded Crane | -4884285.148 | 7098832.261 |
| Hooded Crane | -4880653.906 | 7101143.917 |
| Hooded Crane | -4883761.946 | 7090552.376 |
| Hooded Crane | -4883232.065 | 7090435.9   |
| Hooded Crane | -4880903.261 | 7101174.016 |
| Hooded Crane | -4882546.337 | 7097143.621 |
| Hooded Crane | -4885006.498 | 7098253.043 |
| Hooded Crane | -4882829.089 | 7096812.705 |
| Hooded Crane | -4883073.991 | 7090381.42  |
| Hooded Crane | -4881230.541 | 7096008.036 |
| Hooded Crane | -5739305.666 | 6504864.996 |
| Hooded Crane | -4881551.141 | 7094090.7   |
| Hooded Crane | -4884249.525 | 7090914.967 |
| Hooded Crane | -4881515.519 | 7100982.135 |
| Hooded Crane | -4881114.768 | 7096053.155 |
| Hooded Crane | -4887731.599 | 6969531.803 |
| Hooded Crane | -4884053.603 | 7098595.303 |
| Hooded Crane | -4883991.264 | 7099037.254 |

|              |              |             |
|--------------|--------------|-------------|
| Hooded Crane | -4881573.405 | 7094126.411 |
| Hooded Crane | -4883078.444 | 7090349.483 |
| Hooded Crane | -4881239.446 | 7100942.631 |
| Hooded Crane | -4881531.103 | 7094120.772 |
| Hooded Crane | -4883071.765 | 7090388.934 |
| Hooded Crane | -5730720.707 | 6502935.565 |
| Hooded Crane | -4881577.857 | 7094120.772 |
| Hooded Crane | -4882319.245 | 7096500.604 |
| Hooded Crane | -4880631.642 | 7101296.296 |
| Hooded Crane | -4880491.379 | 7100918.176 |
| Hooded Crane | -4883094.029 | 7090390.813 |
| Hooded Crane | -4884347.486 | 7099086.152 |
| Hooded Crane | -4881085.825 | 7095968.557 |
| Hooded Crane | -4882875.843 | 7090067.696 |
| Hooded Crane | -4880785.263 | 7101316.989 |
| Hooded Crane | -4883067.312 | 7090396.449 |
| Hooded Crane | -4881424.237 | 7095611.372 |
| Hooded Crane | -4884449.9   | 7090958.178 |
| Hooded Crane | -4884389.788 | 7094571.87  |
| Hooded Crane | -4883082.897 | 7090392.691 |
| Hooded Crane | -4884990.913 | 7098303.816 |
| Hooded Crane | -4883942.283 | 7098950.742 |
| Hooded Crane | -4881143.711 | 7096041.876 |
| Hooded Crane | -4883080.671 | 7090383.298 |
| Hooded Crane | -4881551.141 | 7095506.1   |
| Hooded Crane | -4884178.281 | 7098552.049 |
| Hooded Crane | -4883067.312 | 7090396.449 |
| Hooded Crane | -4879834.594 | 7058900.585 |
| Hooded Crane | -4881074.693 | 7101128.867 |
| Hooded Crane | -4880493.606 | 7100912.533 |
| Hooded Crane | -4880740.735 | 7101258.671 |
| Hooded Crane | -4882060.984 | 7095838.84  |
| Hooded Crane | -4883100.708 | 7090253.674 |
| Hooded Crane | -4881515.519 | 7100967.086 |
| Hooded Crane | -4881426.463 | 7095615.132 |
| Hooded Crane | -4884017.981 | 7098576.497 |
| Hooded Crane | -4881297.332 | 7101409.171 |
| Hooded Crane | -4894709.105 | 7063579.765 |
| Hooded Crane | -4881517.745 | 7100965.205 |
| Hooded Crane | -4880789.715 | 7101463.728 |
| Hooded Crane | -4880725.15  | 7101134.511 |
| Hooded Crane | -4894555.484 | 7063656.527 |
| Hooded Crane | -4881301.785 | 7096205.435 |
| Hooded Crane | -4881575.631 | 7094118.892 |
| Hooded Crane | -4883632.815 | 7090578.678 |
| Hooded Crane | -4883989.038 | 7098657.362 |
| Hooded Crane | -4881074.693 | 7101495.71  |
| Hooded Crane | -4884015.754 | 7098555.81  |
| Hooded Crane | -4882067.663 | 7095835.081 |
| Hooded Crane | -4881577.857 | 7094115.133 |
| Hooded Crane | -4880722.924 | 7101204.116 |
| Hooded Crane | -4880495.832 | 7100938.869 |
| Hooded Crane | -4883254.329 | 7090434.021 |
| Hooded Crane | -4881295.106 | 7096203.555 |
| Hooded Crane | -4881332.955 | 7096235.516 |
| Hooded Crane | -4881043.524 | 7101140.155 |
| Hooded Crane | -4884253.978 | 7098854.828 |
| Hooded Crane | -4881524.424 | 7100963.324 |

|              |              |             |
|--------------|--------------|-------------|
| Hooded Crane | -4881526.651 | 7100974.611 |
| Hooded Crane | -4881566.726 | 7094120.772 |
| Hooded Crane | -4881321.823 | 7096226.116 |
| Hooded Crane | -4882363.773 | 7096244.916 |
| Hooded Crane | -4884020.207 | 7098582.138 |
| Hooded Crane | -4880811.979 | 7100910.651 |
| Hooded Crane | -4894551.031 | 7063649.038 |
| Hooded Crane | -4882165.624 | 7096765.701 |
| Hooded Crane | -4881586.763 | 7094111.374 |
| Hooded Crane | -4880785.263 | 7101469.372 |
| Hooded Crane | -4883087.35  | 7090390.813 |
| Hooded Crane | -4880629.415 | 7101285.008 |
| Hooded Crane | -4883802.021 | 7090527.954 |
| Hooded Crane | -4881330.728 | 7096231.756 |
| Hooded Crane | -4884204.997 | 7092427.508 |
| Hooded Crane | -4880845.375 | 7101379.071 |
| Hooded Crane | -4881522.198 | 7100995.303 |
| Hooded Crane | -5477798.371 | 6840514.247 |
| Hooded Crane | -4884022.434 | 7098580.258 |
| Hooded Crane | -4884456.58  | 7092769.514 |
| Hooded Crane | -4881330.728 | 7096233.636 |
| Hooded Crane | -4882063.21  | 7095852     |
| Hooded Crane | -4884009.075 | 7098572.736 |
| Hooded Crane | -4880685.075 | 7101273.721 |
| Hooded Crane | -4881524.424 | 7100965.205 |
| Hooded Crane | -4882063.21  | 7095836.961 |
| Hooded Crane | -4884387.561 | 7090020.732 |
| Hooded Crane | -4883643.947 | 7090569.284 |
| Hooded Crane | -4894548.805 | 7063662.144 |
| Hooded Crane | -4882123.323 | 7095964.797 |
| Hooded Crane | -4882822.409 | 7096820.226 |
| Hooded Crane | -4881330.728 | 7096235.516 |
| Hooded Crane | -4884229.488 | 7098544.527 |
| Hooded Crane | -4877049.381 | 7108418.133 |
| Hooded Crane | -4884017.981 | 7098574.616 |
| Hooded Crane | -4884425.41  | 7092827.769 |
| Hooded Crane | -4881232.767 | 7100982.135 |
| Hooded Crane | -4881299.559 | 7096203.555 |
| Hooded Crane | -4880500.285 | 7100920.057 |
| Hooded Crane | -4880498.058 | 7100925.701 |
| Hooded Crane | -4880983.411 | 7101000.947 |
| Hooded Crane | -4883087.35  | 7090396.449 |
| Hooded Crane | -4883672.89  | 7098999.64  |
| Hooded Crane | -4881528.877 | 7100965.205 |
| Hooded Crane | -4881330.728 | 7096237.396 |
| Hooded Crane | -4881092.505 | 7101497.591 |
| Hooded Crane | -4884022.434 | 7098572.736 |
| Hooded Crane | -4880814.206 | 7101183.422 |
| Hooded Crane | -4881003.449 | 7101497.591 |
| Hooded Crane | -5099561.458 | 7209334.823 |
| Hooded Crane | -4883076.218 | 7090387.055 |
| Hooded Crane | -4880665.038 | 7101298.177 |
| Hooded Crane | -4880653.906 | 7101277.483 |
| Hooded Crane | -4881034.618 | 7101441.153 |
| Hooded Crane | -4894548.805 | 7063665.888 |
| Hooded Crane | -4876922.476 | 7098234.237 |
| Hooded Crane | -4880838.696 | 7101207.878 |
| Hooded Crane | -4884017.981 | 7098576.497 |

|              |              |             |
|--------------|--------------|-------------|
| Hooded Crane | -4880716.245 | 7101269.959 |
| Hooded Crane | -5477798.371 | 6840496.044 |
| Hooded Crane | -4884107.036 | 7098646.079 |
| Hooded Crane | -5477782.786 | 6840494.224 |
| Hooded Crane | -4894551.031 | 7063643.421 |
| Hooded Crane | -4880482.474 | 7101121.343 |
| Hooded Crane | -4876437.123 | 7105739.157 |
| Hooded Crane | -4880498.058 | 7100920.057 |
| Hooded Crane | -4881128.127 | 7101755.331 |
| Hooded Crane | -4880578.208 | 7101110.055 |
| Hooded Crane | -4894539.899 | 7063654.655 |
| Hooded Crane | -4884093.678 | 7098715.661 |
| Hooded Crane | -4880638.321 | 7101281.246 |
| Hooded Crane | -5477785.013 | 6840505.146 |
| Hooded Crane | -4890968.77  | 7062776.62  |
| Hooded Crane | -4882054.305 | 7095844.48  |
| Hooded Crane | -5477802.824 | 6840494.224 |
| Hooded Crane | -4881043.524 | 7101121.343 |
| Hooded Crane | -4880624.963 | 7101286.89  |
| Hooded Crane | -4880531.454 | 7101145.798 |
| Hooded Crane | -4880620.51  | 7101277.483 |
| Hooded Crane | -5477789.465 | 6840514.247 |
| Hooded Crane | -4812096.684 | 6737052.783 |
| Hooded Crane | -5477800.597 | 6840503.326 |
| Hooded Crane | -4882755.618 | 7096855.949 |
| Hooded Crane | -4812045.477 | 6737070.753 |
| Hooded Crane | -4874255.261 | 7109958.535 |
| Hooded Crane | -4884026.886 | 7098584.019 |
| Hooded Crane | -5477805.05  | 6840525.169 |
| Hooded Crane | -5477800.597 | 6840557.934 |
| Hooded Crane | -4880918.846 | 7101426.102 |
| Hooded Crane | -5477780.56  | 6840494.224 |
| Hooded Crane | -4876065.316 | 7111444.612 |
| Hooded Crane | -5477809.503 | 6840525.169 |
| Hooded Crane | -5477791.692 | 6840499.685 |
| Hooded Crane | -4884026.886 | 7098535.124 |
| Hooded Crane | -4889428.108 | 7064047.836 |
| Hooded Crane | -5101928.11  | 7212225.089 |
| Hooded Crane | -4812185.74  | 6735978.283 |
| Hooded Crane | -4878926.227 | 7114560.828 |
| Hooded Crane | -4882737.807 | 7097177.465 |
| Hooded Crane | -4878037.898 | 7114564.597 |
| Hooded Crane | -4953018.254 | 6820218.462 |
| Hooded Crane | -4877519.149 | 7115045.139 |
| Hooded Crane | -4947650.428 | 7122956.656 |
| Hooded Crane | -5748122.17  | 6510631.554 |
| Hooded Crane | -4947338.733 | 7127047.53  |
| Hooded Crane | -4947345.413 | 7127138.127 |
| Hooded Crane | -4944310.843 | 7123988.608 |
| Hooded Crane | -4948932.829 | 7125662.281 |
| Hooded Crane | -4950328.775 | 7125475.461 |
| Hooded Crane | -4812110.042 | 6735791.428 |
| Hooded Crane | -4950310.964 | 7125503.767 |
| Hooded Crane | -4950322.096 | 7125484.896 |
| Hooded Crane | -4950328.775 | 7125479.235 |
| Hooded Crane | -4950317.643 | 7125481.122 |
| Hooded Crane | -4950331.001 | 7125479.235 |
| Hooded Crane | -4950346.586 | 7125496.218 |

|                   |              |             |
|-------------------|--------------|-------------|
| Hooded Crane      | -4818510.913 | 6741499.65  |
| Hooded Crane      | -4950368.85  | 7125530.185 |
| Hooded Crane      | -4949331.352 | 7125483.009 |
| Hooded Crane      | -4949959.194 | 7125290.532 |
| Hooded Crane      | -4953875.414 | 7124481.049 |
| Hooded Crane      | -4953884.32  | 7124492.37  |
| Hooded Crane      | -5100605.635 | 7209235.638 |
| Hooded Crane      | -4812390.568 | 6735250.65  |
| Hooded Crane      | -4814352.017 | 6734636.257 |
| Hooded Crane      | -5113338.358 | 7185500.033 |
| Hooded Crane      | -4879404.901 | 7143905.29  |
| Hooded Crane      | -4879395.995 | 7143924.205 |
| Hooded Crane      | -4879701.011 | 7143772.887 |
| Hooded Crane      | -4879398.222 | 7143950.686 |
| Hooded Crane      | -4879554.069 | 7143977.168 |
| Hooded Crane      | -4879393.769 | 7143937.446 |
| Hooded Crane      | -4879567.427 | 7143969.601 |
| Hooded Crane      | -4879567.427 | 7143969.601 |
| Hooded Crane      | -4879384.864 | 7143926.097 |
| Hooded Crane      | -4879551.843 | 7143948.795 |
| Hooded Crane      | -4879393.769 | 7143935.554 |
| Hooded Crane      | -4879393.769 | 7143935.554 |
| Hooded Crane      | -4879549.616 | 7143982.842 |
| Hooded Crane      | -4879549.616 | 7143982.842 |
| Hooded Crane      | -4879574.107 | 7143971.493 |
| Hooded Crane      | -4879574.107 | 7143971.493 |
| Hooded Crane      | -4879562.975 | 7143931.771 |
| Hooded Crane      | -4879540.711 | 7143975.276 |
| Hooded Crane      | -4879540.711 | 7143975.276 |
| Hooded Crane      | -4879551.843 | 7143963.927 |
| Hooded Crane      | -4879551.843 | 7143965.818 |
| Hooded Crane      | -4879551.843 | 7143965.818 |
| Hooded Crane      | -4879545.164 | 7143980.951 |
| Hooded Crane      | -4812432.869 | 6736431.065 |
| White-naped Crane | -6171778.548 | 5943904.216 |
| White-naped Crane | -6174405.688 | 5936263.253 |
| White-naped Crane | -6174138.521 | 5934884.356 |
| White-naped Crane | -6172977.459 | 5946070.388 |
| White-naped Crane | -6177902.233 | 5933611.724 |
| White-naped Crane | -6226232.703 | 5897547.106 |
| White-naped Crane | -6174296.595 | 5934938.202 |
| White-naped Crane | -5870166.18  | 6250270.512 |
| White-naped Crane | -5855345.103 | 6304667.488 |
| White-naped Crane | -5278009.941 | 5876327.459 |
| White-naped Crane | -6177537.105 | 5933293.596 |
| White-naped Crane | -5332655.566 | 5587847.904 |
| White-naped Crane | -5859255.757 | 6301553.951 |
| White-naped Crane | -6229213.839 | 5906856.54  |
| White-naped Crane | -5858908.44  | 6301678.334 |
| White-naped Crane | -6178868.487 | 5932326.231 |
| White-naped Crane | -6227924.76  | 5907142.793 |
| White-naped Crane | -6174404.575 | 5934877.829 |
| White-naped Crane | -6228165.21  | 5907074.482 |
| White-naped Crane | -6225794.105 | 5905275.814 |
| White-naped Crane | -5858060.186 | 6303286.959 |
| White-naped Crane | -5870264.141 | 6250172.294 |
| White-naped Crane | -6171430.118 | 5937151.085 |
| White-naped Crane | -6173128.854 | 5946161.883 |

|                   |              |             |
|-------------------|--------------|-------------|
| White-naped Crane | -5844442.472 | 6332310.856 |
| White-naped Crane | -6177165.298 | 5933260.968 |
| White-naped Crane | -6170893.558 | 5936504.786 |
| White-naped Crane | -6173064.288 | 5946220.701 |
| White-naped Crane | -6226404.135 | 5905083.935 |
| White-naped Crane | -5881706.672 | 6323960.876 |
| White-naped Crane | -6227960.382 | 5904774.986 |
| White-naped Crane | -6030982.769 | 6267909.27  |
| White-naped Crane | -6226503.21  | 5904802.629 |
| White-naped Crane | -5810734.93  | 6355068.428 |
| White-naped Crane | -6173190.079 | 5946241.941 |
| White-naped Crane | -6172515.483 | 5945967.458 |
| White-naped Crane | -5332268.174 | 5591300.626 |
| White-naped Crane | -5854977.749 | 6304843.053 |
| White-naped Crane | -5867375.401 | 6258997.939 |
| White-naped Crane | -6177026.149 | 5933535.046 |
| White-naped Crane | -5813619.218 | 6359634.645 |
| White-naped Crane | -6228852.051 | 5915318.012 |
| White-naped Crane | -5871022.227 | 6246940.19  |
| White-naped Crane | -5306620.164 | 5863493.042 |
| White-naped Crane | -6172803.801 | 5938164.697 |
| White-naped Crane | -6226323.985 | 5897577.974 |
| White-naped Crane | -6172755.933 | 5945052.579 |
| White-naped Crane | -5979018.831 | 6349491.859 |
| White-naped Crane | -6228365.585 | 5907059.844 |
| White-naped Crane | -6174544.837 | 5935231.915 |
| White-naped Crane | -5817529.872 | 6358437.099 |
| White-naped Crane | -6172782.65  | 5945268.22  |
| White-naped Crane | -6227094.316 | 5903350.712 |
| White-naped Crane | -6228992.314 | 5908208.192 |
| White-naped Crane | -6171392.27  | 5937005.827 |
| White-naped Crane | -5332361.683 | 5589596.844 |
| White-naped Crane | -5962491.226 | 6238242.224 |
| White-naped Crane | -6226505.436 | 5904703.442 |
| White-naped Crane | -6048536.74  | 6304353.866 |
| White-naped Crane | -5815627.422 | 6368237.005 |
| White-naped Crane | -6179111.163 | 5932053.822 |
| White-naped Crane | -6172269.467 | 5937743.568 |
| White-naped Crane | -5870799.588 | 6248734.708 |
| White-naped Crane | -6228267.624 | 5907006.171 |
| White-naped Crane | -5814503.095 | 6375454.01  |
| White-naped Crane | -5816827.446 | 6358061.401 |
| White-naped Crane | -6228499.168 | 5907006.171 |
| White-naped Crane | -5808681.086 | 6358793.943 |
| White-naped Crane | -5952673.96  | 6159763.482 |
| White-naped Crane | -6171721.775 | 5937392.643 |
| White-naped Crane | -6174894.381 | 5931949.428 |
| White-naped Crane | -6172981.912 | 5931889.076 |
| White-naped Crane | -6225081.66  | 5898941.176 |
| White-naped Crane | -6172133.657 | 5943923.817 |
| White-naped Crane | -6172685.802 | 5945122.825 |
| White-naped Crane | -6227875.779 | 5904781.49  |
| White-naped Crane | -6066351.198 | 6310908.289 |
| White-naped Crane | -6185242.641 | 5975232.799 |
| White-naped Crane | -6227264.635 | 5904700.19  |
| White-naped Crane | -6228112.89  | 5907128.155 |
| White-naped Crane | -5277653.719 | 5876040.602 |
| White-naped Crane | -6230113.301 | 5923359.209 |

|                   |              |             |
|-------------------|--------------|-------------|
| White-naped Crane | -6173502.887 | 5947926.608 |
| White-naped Crane | -6172926.252 | 5945454.46  |
| White-naped Crane | -6227149.976 | 5904718.076 |
| White-naped Crane | -6227323.634 | 5904661.166 |
| White-naped Crane | -6226406.362 | 5904820.515 |
| White-naped Crane | -5332257.042 | 5591286.505 |
| White-naped Crane | -6228523.659 | 5907020.809 |
| White-naped Crane | -5855296.123 | 6304827.712 |
| White-naped Crane | -6055150.231 | 6294557.424 |
| White-naped Crane | -6177187.562 | 5931646.041 |
| White-naped Crane | -5816737.277 | 6358243.244 |
| White-naped Crane | -5842977.508 | 6318608.308 |
| White-naped Crane | -6225963.31  | 5905230.283 |
| White-naped Crane | -5812962.433 | 6359816.522 |
| White-naped Crane | -5307489.569 | 5861463.946 |
| White-naped Crane | -6228209.738 | 5907045.206 |
| White-naped Crane | -6233666.619 | 5925116.011 |
| White-naped Crane | -6173541.849 | 5931760.217 |
| White-naped Crane | -6227270.201 | 5904719.702 |
| White-naped Crane | -6174322.199 | 5936227.35  |
| White-naped Crane | -6176201.272 | 5919771.75  |
| White-naped Crane | -6228170.776 | 5907045.206 |
| White-naped Crane | -6173072.081 | 5930672.337 |
| White-naped Crane | -6173490.642 | 5946336.705 |
| White-naped Crane | -6174161.898 | 5936011.934 |
| White-naped Crane | -6226457.569 | 5904734.336 |
| White-naped Crane | -5859177.833 | 6301688.557 |
| White-naped Crane | -5859092.117 | 6301710.708 |
| White-naped Crane | -6226285.024 | 5897495.117 |
| White-naped Crane | -6195116.679 | 5913931.065 |
| White-naped Crane | -6227933.665 | 5904758.726 |
| White-naped Crane | -6174808.665 | 5946307.295 |
| White-naped Crane | -6178913.014 | 5933388.217 |
| White-naped Crane | -5867407.683 | 6259036.929 |
| White-naped Crane | -5329607.638 | 5580938.626 |
| White-naped Crane | -5860039.446 | 6301804.423 |
| White-naped Crane | -5879774.165 | 6262382.244 |
| White-naped Crane | -5813628.124 | 6373613.076 |
| White-naped Crane | -6177645.085 | 5933140.246 |
| White-naped Crane | -5813767.273 | 6360036.153 |
| White-naped Crane | -5871396.261 | 6248807.513 |
| White-naped Crane | -5307182.327 | 5861277.889 |
| White-naped Crane | -5882150.837 | 6323984.794 |
| White-naped Crane | -6200524.58  | 5940522.09  |
| White-naped Crane | -6172529.955 | 5945327.032 |
| White-naped Crane | -6228470.225 | 5906991.533 |
| White-naped Crane | -5859174.494 | 6301719.227 |
| White-naped Crane | -5859824.6   | 6301729.451 |
| White-naped Crane | -6178356.417 | 5932655.742 |
| White-naped Crane | -5858903.987 | 6301840.205 |
| White-naped Crane | -5151506.472 | 6032630.411 |
| White-naped Crane | -6177183.109 | 5932810.715 |
| White-naped Crane | -5277419.948 | 5876157.288 |
| White-naped Crane | -6177788.687 | 5932982.004 |
| White-naped Crane | -5281020.02  | 5874042.596 |
| White-naped Crane | -6226978.544 | 5916446.292 |
| White-naped Crane | -5818941.403 | 6374788.751 |
| White-naped Crane | -6228012.702 | 5907111.89  |



|                   |              |             |
|-------------------|--------------|-------------|
| White-naped Crane | -6225948.839 | 5905218.901 |
| White-naped Crane | -6228127.361 | 5907017.556 |
| White-naped Crane | -6173752.243 | 5931517.186 |
| White-naped Crane | -6171795.246 | 5944049.59  |
| White-naped Crane | -6172636.821 | 5945230.646 |
| White-naped Crane | -6193918.882 | 5944534.735 |
| White-naped Crane | -6173195.645 | 5934660.816 |
| White-naped Crane | -6171557.022 | 5945209.408 |
| White-naped Crane | -6172998.61  | 5930616.886 |
| White-naped Crane | -6178861.807 | 5932562.76  |
| White-naped Crane | -5929428.224 | 6253476.797 |
| White-naped Crane | -5881308.148 | 6262199.091 |
| White-naped Crane | -6189464.989 | 5979858.709 |
| White-naped Crane | -6178001.308 | 5931908.65  |
| White-naped Crane | -6225906.537 | 5905186.379 |
| White-naped Crane | -6178255.116 | 5932644.324 |
| White-naped Crane | -6228067.249 | 5907139.54  |
| White-naped Crane | -5276996.934 | 5877056.797 |
| White-naped Crane | -5280306.462 | 5874941.885 |
| White-naped Crane | -5815297.916 | 6374972.68  |
| White-naped Crane | -5272759.001 | 5877076.247 |
| White-naped Crane | -5811546.45  | 6360827.215 |
| White-naped Crane | -6177390.164 | 5932505.666 |
| White-naped Crane | -6178178.306 | 5932704.681 |
| White-naped Crane | -6177223.184 | 5932375.167 |
| White-naped Crane | -6227271.314 | 5908341.58  |
| White-naped Crane | -5870965.454 | 6246679.509 |
| White-naped Crane | -5881856.953 | 6324210.314 |
| White-naped Crane | -6177096.28  | 5933998.389 |
| White-naped Crane | -6175646.9   | 5931039.298 |
| White-naped Crane | -6173809.016 | 5931448.681 |
| White-naped Crane | -6173469.491 | 5931432.371 |
| White-naped Crane | -6174344.462 | 5946223.969 |
| White-naped Crane | -6172423.088 | 5945697.885 |
| White-naped Crane | -6173191.192 | 5946246.843 |
| White-naped Crane | -6228088.399 | 5907027.315 |
| White-naped Crane | -6174131.842 | 5936801.816 |
| White-naped Crane | -6226406.362 | 5905041.657 |
| White-naped Crane | -5329674.43  | 5585773.149 |
| White-naped Crane | -6229231.651 | 5906843.529 |
| White-naped Crane | -6229970.812 | 5909525.891 |
| White-naped Crane | -6177706.311 | 5933115.775 |
| White-naped Crane | -5815160.993 | 6374826.568 |
| White-naped Crane | -6178701.507 | 5932794.402 |
| White-naped Crane | -6178478.868 | 5934014.704 |
| White-naped Crane | -6174248.728 | 5936289.364 |
| White-naped Crane | -6226257.194 | 5897464.248 |
| White-naped Crane | -6169283.878 | 5950098.696 |
| White-naped Crane | -6178623.584 | 5933112.512 |
| White-naped Crane | -6226426.399 | 5905165.24  |
| White-naped Crane | -6173213.456 | 5946426.568 |
| White-naped Crane | -6228531.451 | 5906835.397 |
| White-naped Crane | -6171728.454 | 5943414.207 |
| White-naped Crane | -6030951.6   | 6267892.3   |
| White-naped Crane | -5332310.476 | 5591280.228 |
| White-naped Crane | -6229194.915 | 5906893.948 |
| White-naped Crane | -5868350.559 | 6317083.78  |
| White-naped Crane | -6228345.547 | 5906989.907 |

|                   |              |             |
|-------------------|--------------|-------------|
| White-naped Crane | -6178407.624 | 5932698.156 |
| White-naped Crane | -6178363.096 | 5932665.53  |
| White-naped Crane | -5274403.19  | 5877564.128 |
| White-naped Crane | -6177668.462 | 5933102.724 |
| White-naped Crane | -5871613.334 | 6252667.064 |
| White-naped Crane | -6231462.493 | 5923722.599 |
| White-naped Crane | -5810495.594 | 6376244.826 |
| White-naped Crane | -5809155.307 | 6373771.198 |
| White-naped Crane | -5881813.539 | 6324205.188 |
| White-naped Crane | -5803349.995 | 6346092.556 |
| White-naped Crane | -6173082.099 | 5935320.031 |
| White-naped Crane | -6177414.654 | 5933673.72  |
| White-naped Crane | -6175633.542 | 5930819.119 |
| White-naped Crane | -6174206.426 | 5935204.175 |
| White-naped Crane | -6174538.158 | 5944096.96  |
| White-naped Crane | -6225310.978 | 5898978.549 |
| White-naped Crane | -6180255.527 | 5933349.063 |
| White-naped Crane | -6174296.595 | 5933378.429 |
| White-naped Crane | -6179428.424 | 5931944.535 |
| White-naped Crane | -6173188.966 | 5946282.787 |
| White-naped Crane | -6229400.856 | 5906633.725 |
| White-naped Crane | -6175545.6   | 5935586.015 |
| White-naped Crane | -6228564.847 | 5906858.167 |
| White-naped Crane | -6173445.001 | 5936166.967 |
| White-naped Crane | -6172153.695 | 5937712.556 |
| White-naped Crane | -6226346.249 | 5904999.38  |
| White-naped Crane | -6178959.769 | 5932252.826 |
| White-naped Crane | -6174095.107 | 5935514.215 |
| White-naped Crane | -6189964.813 | 5980017.816 |
| White-naped Crane | -6172216.034 | 5937575.449 |
| White-naped Crane | -5869007.344 | 6317005.257 |
| White-naped Crane | -6174284.35  | 5936349.747 |
| White-naped Crane | -6171860.925 | 5937738.671 |
| White-naped Crane | -6069710.82  | 6324164.184 |
| White-naped Crane | -6168887.581 | 5940282.077 |
| White-naped Crane | -6178363.096 | 5932636.167 |
| White-naped Crane | -5273921.176 | 5877557.645 |
| White-naped Crane | -6177645.085 | 5933055.415 |
| White-naped Crane | -6177706.311 | 5933115.775 |
| White-naped Crane | -6177273.278 | 5932094.601 |
| White-naped Crane | -5877299.533 | 6253312.472 |
| White-naped Crane | -5300771.438 | 5863659.727 |
| White-naped Crane | -6062368.187 | 6328667.285 |
| White-naped Crane | -6177770.876 | 5932123.962 |
| White-naped Crane | -6225900.971 | 5905051.414 |
| White-naped Crane | -6174480.272 | 5932022.83  |
| White-naped Crane | -6175860.634 | 5930951.226 |
| White-naped Crane | -6177276.618 | 5934053.861 |
| White-naped Crane | -6172627.916 | 5945199.606 |
| White-naped Crane | -6197009.111 | 5949613.238 |
| White-naped Crane | -6174671.742 | 5933889.077 |
| White-naped Crane | -6189782.249 | 5911200.146 |
| White-naped Crane | -6174151.88  | 5945261.685 |
| White-naped Crane | -6172848.328 | 5951618.994 |
| White-naped Crane | -6178062.533 | 5933052.152 |
| White-naped Crane | -6172745.915 | 5945951.12  |
| White-naped Crane | -6228228.662 | 5907066.35  |
| White-naped Crane | -6172861.687 | 5946155.347 |

|                   |              |             |
|-------------------|--------------|-------------|
| White-naped Crane | -6227336.993 | 5904735.962 |
| White-naped Crane | -6226464.248 | 5904731.084 |
| White-naped Crane | -6174593.818 | 5934992.049 |
| White-naped Crane | -6175370.828 | 5936625.555 |
| White-naped Crane | -6175809.427 | 5918972.025 |
| White-naped Crane | -6228194.153 | 5906887.442 |
| White-naped Crane | -6178025.798 | 5933022.788 |
| White-naped Crane | -6066558.252 | 6311401.273 |
| White-naped Crane | -6065662.13  | 6313593.613 |
| White-naped Crane | -6069777.612 | 6323257.023 |
| White-naped Crane | -6069512.672 | 6323942.083 |
| White-naped Crane | -6172120.299 | 5937049.894 |
| White-naped Crane | -6174542.611 | 5935246.601 |
| White-naped Crane | -6172611.218 | 5937258.806 |
| White-naped Crane | -5272977.187 | 5876585.151 |
| White-naped Crane | -6178365.322 | 5932641.061 |
| White-naped Crane | -6227153.316 | 5904948.972 |
| White-naped Crane | -6225617.107 | 5905171.744 |
| White-naped Crane | -6178353.077 | 5932652.48  |
| White-naped Crane | -5814799.205 | 6359396.151 |
| White-naped Crane | -6177009.451 | 5932252.826 |
| White-naped Crane | -6225250.866 | 5905145.726 |
| White-naped Crane | -6174555.969 | 5933907.023 |
| White-naped Crane | -6191118.083 | 5911904.764 |
| White-naped Crane | -6174388.99  | 5951978.674 |
| White-naped Crane | -6178792.789 | 5932875.968 |
| White-naped Crane | -6174495.857 | 5952050.611 |
| White-naped Crane | -6225368.864 | 5898281.483 |
| White-naped Crane | -6178314.115 | 5933783.029 |
| White-naped Crane | -6227123.259 | 5904511.575 |
| White-naped Crane | -6226994.129 | 5903358.841 |
| White-naped Crane | -6171844.227 | 5943660.841 |
| White-naped Crane | -6178284.059 | 5932473.041 |
| White-naped Crane | -6172792.669 | 5945952.754 |
| White-naped Crane | -6226791.527 | 5904911.573 |
| White-naped Crane | -6006381.162 | 6255543.833 |
| White-naped Crane | -6226364.06  | 5905022.145 |
| White-naped Crane | -6172931.818 | 5930437.49  |
| White-naped Crane | -6178584.622 | 5932809.084 |
| White-naped Crane | -6098853.15  | 6313194.342 |
| White-naped Crane | -5331580.22  | 5584937.423 |
| White-naped Crane | -5863101.845 | 6281173.425 |
| White-naped Crane | -6227985.985 | 5907128.155 |
| White-naped Crane | -5859426.076 | 6301889.619 |
| White-naped Crane | -5871545.429 | 6252882.195 |
| White-naped Crane | -6225308.752 | 5905119.709 |
| White-naped Crane | -5169326.496 | 6034280.967 |
| White-naped Crane | -6055588.83  | 6293791.364 |
| White-naped Crane | -6177680.708 | 5933161.453 |
| White-naped Crane | -5870772.871 | 6248904.022 |
| White-naped Crane | -5811413.979 | 6377878.271 |
| White-naped Crane | -5815294.577 | 6358299.856 |
| White-naped Crane | -6177053.979 | 5933466.526 |
| White-naped Crane | -5815354.689 | 6358325.589 |
| White-naped Crane | -5279221.097 | 5876004.948 |
| White-naped Crane | -5307294.76  | 5862910.478 |
| White-naped Crane | -6226134.742 | 5905201.014 |
| White-naped Crane | -6228737.392 | 5915853.642 |

|                   |              |             |
|-------------------|--------------|-------------|
| White-naped Crane | -5306820.539 | 5862989.769 |
| White-naped Crane | -5961490.464 | 6159912.585 |
| White-naped Crane | -5952760.79  | 6159793.638 |
| White-naped Crane | -5927676.056 | 6264682.183 |
| White-naped Crane | -5927328.739 | 6265352.27  |
| White-naped Crane | -5926182.148 | 6265527.01  |
| White-naped Crane | -5811235.868 | 6354687.738 |
| White-naped Crane | -6174023.862 | 5935140.537 |
| White-naped Crane | -6225014.868 | 5898582.076 |
| White-naped Crane | -6177243.222 | 5934008.178 |
| White-naped Crane | -6173467.265 | 5931254.589 |
| White-naped Crane | -6178441.02  | 5932549.71  |
| White-naped Crane | -6173413.831 | 5932079.921 |
| White-naped Crane | -6173331.455 | 5931619.943 |
| White-naped Crane | -6228528.111 | 5906902.08  |
| White-naped Crane | -6173886.939 | 5934807.667 |
| White-naped Crane | -6228534.791 | 5906820.759 |
| White-naped Crane | -6229778.229 | 5911914.528 |
| White-naped Crane | -6171545.89  | 5937027.044 |
| White-naped Crane | -6094564.01  | 5870655.301 |
| White-naped Crane | -6092958.783 | 5885385.329 |
| White-naped Crane | -6228441.282 | 5904958.728 |
| White-naped Crane | -6227453.878 | 5908273.259 |
| White-naped Crane | -5331459.995 | 5586124.396 |
| White-naped Crane | -5859069.853 | 6301819.758 |
| White-naped Crane | -6178207.249 | 5932505.666 |
| White-naped Crane | -6178105.948 | 5932517.085 |
| White-naped Crane | -6228318.831 | 5906936.235 |
| White-naped Crane | -6224826.738 | 5929410.11  |
| White-naped Crane | -6178471.076 | 5932773.195 |
| White-naped Crane | -6178295.191 | 5933451.843 |
| White-naped Crane | -5152071.975 | 6032188.116 |
| White-naped Crane | -6054866.366 | 6293881.586 |
| White-naped Crane | -6177681.821 | 5933140.246 |
| White-naped Crane | -6178821.732 | 5930280.929 |
| White-naped Crane | -6226208.213 | 5905001.006 |
| White-naped Crane | -6227981.533 | 5907121.649 |
| White-naped Crane | -5871775.86  | 6248890.477 |
| White-naped Crane | -5277756.133 | 5876821.781 |
| White-naped Crane | -6177459.182 | 5933169.61  |
| White-naped Crane | -5280171.766 | 5873843.306 |
| White-naped Crane | -6228509.187 | 5914912.649 |
| White-naped Crane | -5307583.077 | 5861572.347 |
| White-naped Crane | -5307209.044 | 5862860.314 |
| White-naped Crane | -6177695.179 | 5931735.751 |
| White-naped Crane | -6178339.719 | 5932645.955 |
| White-naped Crane | -5871066.755 | 6248174.303 |
| White-naped Crane | -5881315.94  | 6323988.211 |
| White-naped Crane | -5881416.128 | 6324007.004 |
| White-naped Crane | -6171496.91  | 5938087.978 |
| White-naped Crane | -6174222.011 | 5934285.543 |
| White-naped Crane | -6177016.13  | 5933936.391 |
| White-naped Crane | -6174598.271 | 5934706.503 |
| White-naped Crane | -6178311.889 | 5933017.894 |
| White-naped Crane | -6176628.738 | 5918716.324 |
| White-naped Crane | -6178298.531 | 5932952.64  |
| White-naped Crane | -6172374.107 | 5945003.57  |
| White-naped Crane | -6171151.819 | 5937350.207 |

|                   |              |             |
|-------------------|--------------|-------------|
| White-naped Crane | -6175232.792 | 5945034.609 |
| White-naped Crane | -6174520.347 | 5944243.972 |
| White-naped Crane | -6173396.02  | 5931403.012 |
| White-naped Crane | -6193950.051 | 5944490.629 |
| White-naped Crane | -6227862.421 | 5904758.726 |
| White-naped Crane | -6174139.635 | 5951169.416 |
| White-naped Crane | -6170860.162 | 5936243.669 |
| White-naped Crane | -6172910.667 | 5945451.193 |
| White-naped Crane | -6175292.904 | 5945717.49  |
| White-naped Crane | -6173309.191 | 5931566.118 |
| White-naped Crane | -6179075.541 | 5933580.727 |
| White-naped Crane | -6173102.137 | 5931199.134 |
| White-naped Crane | -6172852.781 | 5946349.776 |
| White-naped Crane | -6173202.324 | 5946258.28  |
| White-naped Crane | -6170800.05  | 5944281.541 |
| White-naped Crane | -6171494.683 | 5945246.982 |
| White-naped Crane | -6172006.753 | 5943548.14  |
| White-naped Crane | -6171806.378 | 5935883.014 |
| White-naped Crane | -6173295.833 | 5931391.595 |
| White-naped Crane | -6178518.943 | 5933477.946 |
| White-naped Crane | -6178245.097 | 5932769.933 |
| White-naped Crane | -6030958.279 | 6267897.391 |
| White-naped Crane | -6173716.62  | 5935763.887 |
| White-naped Crane | -6177205.373 | 5933903.76  |
| White-naped Crane | -6228641.657 | 5906446.695 |
| White-naped Crane | -5870660.439 | 6249776.044 |
| White-naped Crane | -6178098.156 | 5932871.074 |
| White-naped Crane | -6171809.718 | 5937738.671 |
| White-naped Crane | -6172673.557 | 5937053.158 |
| White-naped Crane | -6174092.88  | 5936282.836 |
| White-naped Crane | -5929441.583 | 6253334.495 |
| White-naped Crane | -6172121.412 | 5936460.722 |
| White-naped Crane | -6228042.758 | 5907131.408 |
| White-naped Crane | -5872729.868 | 6263988.403 |
| White-naped Crane | -5854743.978 | 6307732.74  |
| White-naped Crane | -5855336.198 | 6304667.488 |
| White-naped Crane | -6228098.418 | 5907098.879 |
| White-naped Crane | -5381538.181 | 5958105.346 |
| White-naped Crane | -6178797.242 | 5933001.58  |
| White-naped Crane | -5870690.495 | 6249522.048 |
| White-naped Crane | -6225892.066 | 5905092.066 |
| White-naped Crane | -6178281.833 | 5932982.004 |
| White-naped Crane | -6054859.687 | 6294179.492 |
| White-naped Crane | -6177255.467 | 5933220.183 |
| White-naped Crane | -6189955.908 | 5979789.819 |
| White-naped Crane | -6177717.443 | 5932024.461 |
| White-naped Crane | -5281183.66  | 5873802.801 |
| White-naped Crane | -6177789.801 | 5933396.374 |
| White-naped Crane | -5858528.841 | 6302296.868 |
| White-naped Crane | -6177417.994 | 5933401.269 |
| White-naped Crane | -5302559.229 | 5871946.237 |
| White-naped Crane | -6226557.756 | 5910563.923 |
| White-naped Crane | -5811568.713 | 6360846.092 |
| White-naped Crane | -5813632.577 | 6359684.403 |
| White-naped Crane | -6177591.652 | 5932722.625 |
| White-naped Crane | -5871181.414 | 6249130.909 |
| White-naped Crane | -6228646.11  | 5915785.262 |
| White-naped Crane | -5928542.121 | 6255418.441 |

|                   |              |             |
|-------------------|--------------|-------------|
| White-naped Crane | -5278022.186 | 5876797.47  |
| White-naped Crane | -6172104.714 | 5938461.784 |
| White-naped Crane | -6173482.85  | 5934225.175 |
| White-naped Crane | -6176938.207 | 5934027.756 |
| White-naped Crane | -6177140.808 | 5934008.178 |
| White-naped Crane | -6175718.145 | 5934050.598 |
| White-naped Crane | -6173843.525 | 5931068.655 |
| White-naped Crane | -6170697.636 | 5936147.384 |
| White-naped Crane | -6177755.292 | 5934037.546 |
| White-naped Crane | -6173825.714 | 5935481.579 |
| White-naped Crane | -6165830.748 | 5933742.242 |
| White-naped Crane | -6177508.162 | 5930646.242 |
| White-naped Crane | -6178176.079 | 5931903.756 |
| White-naped Crane | -6179229.162 | 5933448.58  |
| White-naped Crane | -6191725.888 | 5989103.241 |
| White-naped Crane | -6179359.405 | 5932073.396 |
| White-naped Crane | -6172015.659 | 5943553.04  |
| White-naped Crane | -6179250.312 | 5932022.83  |
| White-naped Crane | -6173629.791 | 5931497.613 |
| White-naped Crane | -6176909.263 | 5950239.272 |
| White-naped Crane | -6174138.521 | 5935816.107 |
| White-naped Crane | -6173042.024 | 5930698.431 |
| White-naped Crane | -6228520.319 | 5906872.804 |
| White-naped Crane | -6171711.756 | 5937297.978 |
| White-naped Crane | -6175825.012 | 5918985.055 |
| White-naped Crane | -6173945.939 | 5934856.617 |
| White-naped Crane | -6174161.898 | 5935778.574 |
| White-naped Crane | -6227279.107 | 5904822.141 |
| White-naped Crane | -6226395.23  | 5905046.536 |
| White-naped Crane | -5332147.949 | 5589625.081 |
| White-naped Crane | -6178396.492 | 5932831.922 |
| White-naped Crane | -5978994.341 | 6349517.565 |
| White-naped Crane | -5978989.888 | 6349498.714 |
| White-naped Crane | -6171585.965 | 5944497.164 |
| White-naped Crane | -6172556.671 | 5945287.824 |
| White-naped Crane | -6171752.945 | 5937459.563 |
| White-naped Crane | -6178341.945 | 5932717.731 |
| White-naped Crane | -6178542.32  | 5933218.552 |
| White-naped Crane | -6229287.31  | 5906664.626 |
| White-naped Crane | -6178674.791 | 5932931.433 |
| White-naped Crane | -6178623.584 | 5933003.212 |
| White-naped Crane | -5933844.269 | 6249237.581 |
| White-naped Crane | -6174299.935 | 5936366.067 |
| White-naped Crane | -6178374.228 | 5932639.43  |
| White-naped Crane | -6066574.95  | 6311334.744 |
| White-naped Crane | -6069753.122 | 6323333.898 |
| White-naped Crane | -6171662.776 | 5937697.865 |
| White-naped Crane | -6227175.58  | 5904493.69  |
| White-naped Crane | -5859386.001 | 6301628.922 |
| White-naped Crane | -5862533.003 | 6272762.425 |
| White-naped Crane | -6178007.987 | 5932836.816 |
| White-naped Crane | -5402455.113 | 5762904.055 |
| White-naped Crane | -5858890.629 | 6301724.339 |
| White-naped Crane | -6178551.226 | 5932600.279 |
| White-naped Crane | -5884118.965 | 6259248.833 |
| White-naped Crane | -5876357.77  | 6252848.316 |
| White-naped Crane | -5381393.466 | 5958192.06  |
| White-naped Crane | -6178235.079 | 5933438.791 |

|                   |              |             |
|-------------------|--------------|-------------|
| White-naped Crane | -6189892.456 | 5979663.521 |
| White-naped Crane | -6048173.838 | 6304684.533 |
| White-naped Crane | -6001454.161 | 6303764.153 |
| White-naped Crane | -6177175.317 | 5933252.811 |
| White-naped Crane | -6228126.248 | 5907074.482 |
| White-naped Crane | -6177255.467 | 5933229.971 |
| White-naped Crane | -6228052.777 | 5907118.396 |
| White-naped Crane | -5815127.598 | 6358099.141 |
| White-naped Crane | -6228018.268 | 5907113.517 |
| White-naped Crane | -5270830.947 | 5873585.695 |
| White-naped Crane | -6225707.275 | 5905140.848 |
| White-naped Crane | -5814359.493 | 6359516.255 |
| White-naped Crane | -6177212.052 | 5932327.862 |
| White-naped Crane | -5306591.221 | 5866966.582 |
| White-naped Crane | -5307005.329 | 5861920.209 |
| White-naped Crane | -6178166.061 | 5932231.621 |
| White-naped Crane | -5871963.99  | 6249069.954 |
| White-naped Crane | -5871758.049 | 6248858.307 |
| White-naped Crane | -5881718.917 | 6323947.208 |
| White-naped Crane | -5919251.396 | 6272674.129 |
| White-naped Crane | -6175148.189 | 5935966.241 |
| White-naped Crane | -6178906.335 | 5932539.923 |
| White-naped Crane | -6174237.596 | 5935524.006 |
| White-naped Crane | -6175152.642 | 5935964.609 |
| White-naped Crane | -6178879.618 | 5932535.029 |
| White-naped Crane | -6174237.596 | 5935522.374 |
| White-naped Crane | -6178877.392 | 5932536.66  |
| White-naped Crane | -6175152.642 | 5935969.505 |
| White-naped Crane | -6174555.969 | 5935486.474 |
| White-naped Crane | -6175150.416 | 5935967.873 |
| White-naped Crane | -6178870.713 | 5932546.448 |
| White-naped Crane | -6174237.596 | 5935525.638 |
| White-naped Crane | -6178857.355 | 5932566.023 |
| White-naped Crane | -6174244.275 | 5935524.006 |
| White-naped Crane | -6175152.642 | 5935976.032 |
| White-naped Crane | -6178763.846 | 5932446.941 |
| White-naped Crane | -6171732.907 | 5937474.252 |
| White-naped Crane | -6171744.039 | 5937448.137 |
| White-naped Crane | -6171864.264 | 5937639.105 |
| White-naped Crane | -6178699.281 | 5932490.985 |
| White-naped Crane | -6171784.114 | 5937603.196 |
| White-naped Crane | -6178643.621 | 5932399.636 |
| White-naped Crane | -6174173.03  | 5934838.669 |
| White-naped Crane | -6173560.773 | 5936039.677 |
| White-naped Crane | -6178545.66  | 5932530.135 |
| White-naped Crane | -6174090.654 | 5935072.004 |
| White-naped Crane | -6178542.32  | 5932531.766 |
| White-naped Crane | -6174177.483 | 5934739.136 |
| White-naped Crane | -6178427.661 | 5932637.798 |
| White-naped Crane | -6174173.03  | 5934636.341 |
| White-naped Crane | -6174166.351 | 5934637.973 |
| White-naped Crane | -6174753.005 | 5934368.754 |
| White-naped Crane | -6174696.232 | 5933978.81  |
| White-naped Crane | -6178750.488 | 5931998.363 |
| White-naped Crane | -6174722.949 | 5934223.543 |
| White-naped Crane | -6174531.479 | 5933908.655 |
| White-naped Crane | -6178790.563 | 5932091.339 |
| White-naped Crane | -6174720.722 | 5934220.28  |

|                   |              |             |
|-------------------|--------------|-------------|
| White-naped Crane | -6178870.713 | 5932551.341 |
| White-naped Crane | -6176408.326 | 5920595.984 |
| White-naped Crane | -6174691.779 | 5934200.701 |
| White-naped Crane | -6178855.128 | 5932574.179 |
| White-naped Crane | -6176432.816 | 5920402.135 |
| White-naped Crane | -6174720.722 | 5934218.648 |
| White-naped Crane | -6173825.714 | 5934864.776 |
| White-naped Crane | -6176423.911 | 5920410.28  |
| White-naped Crane | -6175268.414 | 5933791.187 |
| White-naped Crane | -6174132.955 | 5934892.515 |
| White-naped Crane | -6174718.496 | 5934200.701 |
| White-naped Crane | -6177145.261 | 5933135.351 |
| White-naped Crane | -6171904.339 | 5937439.977 |
| White-naped Crane | -6176519.645 | 5920146.392 |
| White-naped Crane | -6174685.1   | 5934150.122 |
| White-naped Crane | -6176519.645 | 5920144.763 |
| White-naped Crane | -6177156.393 | 5933133.72  |
| White-naped Crane | -6173758.922 | 5935112.797 |
| White-naped Crane | -6174567.101 | 5934735.873 |
| White-naped Crane | -6177238.769 | 5933008.106 |
| White-naped Crane | -6174342.236 | 5933947.811 |
| White-naped Crane | -6176368.251 | 5920149.65  |
| White-naped Crane | -6171087.254 | 5937213.106 |
| White-naped Crane | -6172149.242 | 5938698.482 |
| White-naped Crane | -6177236.543 | 5933004.843 |
| White-naped Crane | -6176274.742 | 5920056.802 |
| White-naped Crane | -6171768.529 | 5938143.476 |
| White-naped Crane | -6171797.472 | 5937348.575 |
| White-naped Crane | -6171764.077 | 5938143.476 |
| White-naped Crane | -6176268.063 | 5920043.771 |
| White-naped Crane | -6178870.713 | 5932548.079 |
| White-naped Crane | -6176417.231 | 5931884.183 |
| White-naped Crane | -6177240.996 | 5934011.441 |
| White-naped Crane | -6171764.077 | 5938143.476 |
| White-naped Crane | -6176270.29  | 5920037.256 |
| White-naped Crane | -6172701.387 | 5936888.316 |
| White-naped Crane | -6178850.675 | 5932556.235 |
| White-naped Crane | -6177205.373 | 5934044.072 |
| White-naped Crane | -6175433.167 | 5932717.731 |
| White-naped Crane | -6171766.303 | 5938145.109 |
| White-naped Crane | -6175433.167 | 5932720.994 |
| White-naped Crane | -6172581.162 | 5936682.677 |
| White-naped Crane | -6178843.996 | 5932552.973 |
| White-naped Crane | -6176272.516 | 5920048.658 |
| White-naped Crane | -6177205.373 | 5934045.703 |
| White-naped Crane | -6175433.167 | 5932729.15  |
| White-naped Crane | -6178848.449 | 5932569.285 |
| White-naped Crane | -6172585.614 | 5936700.629 |
| White-naped Crane | -6176252.478 | 5920009.564 |
| White-naped Crane | -6177212.052 | 5934045.703 |
| White-naped Crane | -6175433.167 | 5932722.625 |
| White-naped Crane | -6172587.841 | 5936687.573 |
| White-naped Crane | -6171127.329 | 5937740.304 |
| White-naped Crane | -6176270.29  | 5920043.771 |
| White-naped Crane | -6178850.675 | 5932556.235 |
| White-naped Crane | -6177205.373 | 5934035.914 |
| White-naped Crane | -6171127.329 | 5937743.568 |
| White-naped Crane | -6178855.128 | 5932561.129 |



|                   |              |             |
|-------------------|--------------|-------------|
| White-naped Crane | -6172605.652 | 5936695.733 |
| White-naped Crane | -6175442.073 | 5932717.731 |
| White-naped Crane | -6177205.373 | 5934031.019 |
| White-naped Crane | -6176265.837 | 5920037.256 |
| White-naped Crane | -6171127.329 | 5937743.568 |
| White-naped Crane | -6178843.996 | 5932559.498 |
| White-naped Crane | -6172601.199 | 5936697.365 |
| White-naped Crane | -6176263.61  | 5920047.029 |
| White-naped Crane | -6175430.941 | 5932714.469 |
| White-naped Crane | -6177198.694 | 5934034.282 |
| White-naped Crane | -6171127.329 | 5937748.465 |
| White-naped Crane | -6172601.199 | 5936692.469 |
| White-naped Crane | -6176268.063 | 5920047.029 |
| White-naped Crane | -6178846.223 | 5932559.498 |
| White-naped Crane | -6175428.714 | 5932719.363 |
| White-naped Crane | -6177203.147 | 5934021.23  |
| White-naped Crane | -6171127.329 | 5937743.568 |
| White-naped Crane | -6172601.199 | 5936702.261 |
| White-naped Crane | -6178846.223 | 5932556.235 |
| White-naped Crane | -6175428.714 | 5932720.994 |
| White-naped Crane | -6176263.61  | 5920020.967 |
| White-naped Crane | -6177198.694 | 5934022.862 |
| White-naped Crane | -6171129.556 | 5937740.304 |
| White-naped Crane | -6172601.199 | 5936697.365 |
| White-naped Crane | -6178881.845 | 5932580.704 |
| White-naped Crane | -6175435.393 | 5932720.994 |
| White-naped Crane | -6176268.063 | 5920020.967 |
| White-naped Crane | -6177203.147 | 5934037.546 |
| White-naped Crane | -6170958.124 | 5937673.382 |
| White-naped Crane | -6177060.658 | 5933680.246 |
| White-naped Crane | -6176272.516 | 5920060.06  |
| White-naped Crane | -6172552.219 | 5936692.469 |
| White-naped Crane | -6178786.11  | 5932585.598 |
| White-naped Crane | -6177200.921 | 5934040.809 |
| White-naped Crane | -6170960.35  | 5937671.75  |
| White-naped Crane | -6171601.55  | 5937188.624 |
| White-naped Crane | -6173099.911 | 5935347.771 |
| White-naped Crane | -6171594.871 | 5937198.417 |
| White-naped Crane | -6176196.819 | 5920056.802 |
| White-naped Crane | -6178939.731 | 5932030.986 |
| White-naped Crane | -6171000.425 | 5937546.069 |
| White-naped Crane | -6173102.137 | 5935337.981 |
| White-naped Crane | -6176187.913 | 5920064.947 |
| White-naped Crane | -6171541.438 | 5937325.724 |
| White-naped Crane | -6171557.022 | 5937315.932 |
| White-naped Crane | -6173097.684 | 5935339.612 |
| White-naped Crane | -6171002.651 | 5937550.966 |
| White-naped Crane | -6176112.216 | 5920340.235 |
| White-naped Crane | -6177403.522 | 5933859.71  |
| White-naped Crane | -6173093.231 | 5935349.403 |
| White-naped Crane | -6171000.425 | 5937554.23  |
| White-naped Crane | -6186099.801 | 5913649.47  |
| White-naped Crane | -6176112.216 | 5920340.235 |
| White-naped Crane | -6177276.618 | 5933786.292 |
| White-naped Crane | -6176104.424 | 5920345.122 |
| White-naped Crane | -6176103.31  | 5920353.267 |
| White-naped Crane | -6178739.356 | 5932102.757 |
| White-naped Crane | -6173211.23  | 5935120.956 |

|                   |              |             |
|-------------------|--------------|-------------|
| White-naped Crane | -6176084.386 | 5920159.423 |
| White-naped Crane | -6171044.953 | 5937516.69  |
| White-naped Crane | -6177033.941 | 5933768.346 |
| White-naped Crane | -6185436.336 | 5911144.82  |
| White-naped Crane | -6171049.405 | 5937526.483 |
| White-naped Crane | -6185436.336 | 5911185.501 |
| White-naped Crane | -6176207.951 | 5920074.72  |
| White-naped Crane | -6173727.752 | 5934220.28  |
| White-naped Crane | -6178492.227 | 5931588.953 |
| White-naped Crane | -6176993.866 | 5933783.029 |
| White-naped Crane | -6178131.551 | 5931911.912 |
| White-naped Crane | -6171056.085 | 5937534.644 |
| White-naped Crane | -6176190.14  | 5920066.576 |
| White-naped Crane | -6185437.45  | 5911154.583 |
| White-naped Crane | -6173736.658 | 5934210.49  |
| White-naped Crane | -6176993.866 | 5933796.081 |
| White-naped Crane | -6178136.004 | 5933185.924 |
| White-naped Crane | -6171056.085 | 5937536.276 |
| White-naped Crane | -6176275.856 | 5920063.318 |
| White-naped Crane | -6174001.598 | 5934021.23  |
| White-naped Crane | -6177002.772 | 5933779.766 |
| White-naped Crane | -6185461.94  | 5911162.719 |
| White-naped Crane | -6178124.872 | 5933172.873 |
| White-naped Crane | -6176281.422 | 5920060.06  |
| White-naped Crane | -6185449.695 | 5911154.583 |
| White-naped Crane | -6173990.466 | 5934027.756 |
| White-naped Crane | -6171049.405 | 5937531.379 |
| White-naped Crane | -6177002.772 | 5933781.398 |
| White-naped Crane | -6185459.714 | 5911196.891 |
| White-naped Crane | -6178138.231 | 5933161.453 |
| White-naped Crane | -6171018.236 | 5937547.701 |
| White-naped Crane | -6176278.082 | 5920066.576 |
| White-naped Crane | -6177007.225 | 5933784.661 |
| White-naped Crane | -6173979.334 | 5934016.336 |
| White-naped Crane | -6176276.969 | 5920019.338 |
| White-naped Crane | -6171002.651 | 5937570.552 |
| White-naped Crane | -6185367.318 | 5925428.948 |
| White-naped Crane | -6177004.998 | 5933774.872 |
| White-naped Crane | -6178104.835 | 5933125.563 |
| White-naped Crane | -6178866.26  | 5932551.341 |
| White-naped Crane | -6170991.519 | 5937559.127 |
| White-naped Crane | -6176274.742 | 5920064.947 |
| White-naped Crane | -6174010.504 | 5934031.019 |
| White-naped Crane | -6193853.203 | 5936658.196 |
| White-naped Crane | -6177007.225 | 5933779.766 |
| White-naped Crane | -6176201.272 | 5920066.576 |
| White-naped Crane | -6178864.034 | 5932551.341 |
| White-naped Crane | -6170987.067 | 5937549.334 |
| White-naped Crane | -6201875.999 | 5941594.885 |
| White-naped Crane | -6177136.355 | 5934001.652 |
| White-naped Crane | -6170978.161 | 5937529.747 |
| White-naped Crane | -6176550.815 | 5934970.837 |
| White-naped Crane | -6176214.63  | 5920066.576 |
| White-naped Crane | -6206230.817 | 5944698.089 |
| White-naped Crane | -6175471.016 | 5934481.336 |
| White-naped Crane | -6178781.657 | 5932428.998 |
| White-naped Crane | -6170980.387 | 5937521.586 |
| White-naped Crane | -6175479.921 | 5934531.916 |

|                   |              |             |
|-------------------|--------------|-------------|
| White-naped Crane | -6176212.403 | 5920071.462 |
| White-naped Crane | -6206204.101 | 5944781.401 |
| White-naped Crane | -6176555.268 | 5934974.1   |
| White-naped Crane | -6178768.299 | 5932471.41  |
| White-naped Crane | -6175479.921 | 5934536.811 |
| White-naped Crane | -6178768.299 | 5932477.935 |
| White-naped Crane | -6170942.539 | 5937544.437 |
| White-naped Crane | -6206208.553 | 5944794.47  |
| White-naped Crane | -6176555.268 | 5934980.627 |
| White-naped Crane | -6176214.63  | 5920069.834 |
| White-naped Crane | -6176216.856 | 5920073.091 |
| White-naped Crane | -6178752.714 | 5932458.36  |
| White-naped Crane | -6206210.78  | 5944787.935 |
| White-naped Crane | -6170958.124 | 5937559.127 |
| White-naped Crane | -6176553.041 | 5934980.627 |
| White-naped Crane | -6175493.28  | 5934551.496 |
| White-naped Crane | -6176214.63  | 5920066.576 |
| White-naped Crane | -6206192.969 | 5944763.432 |
| White-naped Crane | -6170953.671 | 5937534.644 |
| White-naped Crane | -6176561.947 | 5934992.049 |
| White-naped Crane | -6175488.827 | 5934540.074 |
| White-naped Crane | -6178710.413 | 5932473.041 |
| White-naped Crane | -6170958.124 | 5937521.586 |
| White-naped Crane | -6175479.921 | 5934538.443 |
| White-naped Crane | -6176216.856 | 5920061.689 |
| White-naped Crane | -6206201.874 | 5944781.401 |
| White-naped Crane | -6176564.173 | 5934977.363 |
| White-naped Crane | -6178705.96  | 5932484.46  |
| White-naped Crane | -6176210.177 | 5920063.318 |
| White-naped Crane | -6170953.671 | 5937533.012 |
| White-naped Crane | -6176550.815 | 5934980.627 |
| White-naped Crane | -6175444.299 | 5934523.758 |
| White-naped Crane | -6206204.101 | 5944781.401 |
| White-naped Crane | -6178705.96  | 5932492.616 |
| White-naped Crane | -6178703.734 | 5932494.247 |
| White-naped Crane | -6176216.856 | 5920066.576 |
| White-naped Crane | -6170944.765 | 5937542.805 |
| White-naped Crane | -6176555.268 | 5934982.259 |
| White-naped Crane | -6175479.921 | 5934558.022 |
| White-naped Crane | -6206201.874 | 5944787.935 |
| White-naped Crane | -6206204.101 | 5944791.202 |
| White-naped Crane | -6176555.268 | 5934977.363 |
| White-naped Crane | -6170944.765 | 5937533.012 |
| White-naped Crane | -6176214.63  | 5920066.576 |
| White-naped Crane | -6178703.734 | 5932484.46  |
| White-naped Crane | -6175486.6   | 5934554.759 |
| White-naped Crane | -6178705.96  | 5932484.46  |
| White-naped Crane | -6170951.444 | 5937537.908 |
| White-naped Crane | -6176219.083 | 5920066.576 |
| White-naped Crane | -6206206.327 | 5944784.668 |
| White-naped Crane | -6176548.588 | 5934975.732 |
| White-naped Crane | -6175482.148 | 5934544.969 |
| White-naped Crane | -6203999.975 | 5947361.203 |
| White-naped Crane | -6177461.408 | 5933109.25  |
| White-naped Crane | -6170962.576 | 5937502     |
| White-naped Crane | -6176216.856 | 5920061.689 |
| White-naped Crane | -6176548.588 | 5934977.363 |
| White-naped Crane | -6175486.6   | 5934549.864 |

|                   |              |             |
|-------------------|--------------|-------------|
| White-naped Crane | -6171051.632 | 5937389.379 |
| White-naped Crane | -6177692.953 | 5933176.136 |
| White-naped Crane | -6176212.403 | 5920066.576 |
| White-naped Crane | -6175517.77  | 5934546.601 |
| White-naped Crane | -6171365.553 | 5936981.345 |
| White-naped Crane | -6178006.874 | 5933352.326 |
| White-naped Crane | -6171122.876 | 5937386.115 |
| White-naped Crane | -6176029.84  | 5920537.34  |
| White-naped Crane | -6171398.949 | 5937062.95  |
| White-naped Crane | -6175491.053 | 5934533.548 |
| White-naped Crane | -6177232.09  | 5934040.809 |
| White-naped Crane | -6176575.305 | 5931194.241 |
| White-naped Crane | -6176216.856 | 5920758.886 |
| White-naped Crane | -6175495.506 | 5934531.916 |
| White-naped Crane | -6197104.846 | 5940882.94  |
| White-naped Crane | -6174442.424 | 5933882.551 |
| White-naped Crane | -6199999.152 | 5945353.171 |
| White-naped Crane | -6176223.535 | 5920765.402 |
| White-naped Crane | -6175495.506 | 5934531.916 |
| White-naped Crane | -6177232.09  | 5934058.756 |
| White-naped Crane | -6175482.148 | 5934500.915 |
| White-naped Crane | -6175455.431 | 5934455.23  |
| White-naped Crane | -6205671.994 | 5945990.331 |
| White-naped Crane | -6174469.14  | 5933880.919 |
| White-naped Crane | -6176949.338 | 5934058.756 |
| White-naped Crane | -6176176.781 | 5920077.978 |
| White-naped Crane | -6175016.832 | 5933115.775 |
| White-naped Crane | -6175373.055 | 5933287.07  |
| White-naped Crane | -6173810.129 | 5934146.859 |
| White-naped Crane | -6176973.829 | 5934084.86  |
| White-naped Crane | -6176194.592 | 5920063.318 |
| White-naped Crane | -6175375.281 | 5933283.807 |
| White-naped Crane | -6175001.247 | 5933122.301 |
| White-naped Crane | -6233555.3   | 5925301.816 |
| White-naped Crane | -6173790.091 | 5934143.596 |
| White-naped Crane | -6176973.829 | 5934091.387 |
| White-naped Crane | -6176230.215 | 5920082.865 |
| White-naped Crane | -6175377.507 | 5933290.333 |
| White-naped Crane | -6233443.98  | 5924767.229 |
| White-naped Crane | -6175019.059 | 5933107.618 |
| White-naped Crane | -6173881.373 | 5934225.175 |
| White-naped Crane | -6174874.343 | 5932714.469 |
| White-naped Crane | -6176924.848 | 5934066.913 |
| White-naped Crane | -6233492.961 | 5924847.089 |
| White-naped Crane | -6176976.055 | 5934094.65  |
| White-naped Crane | -6176969.376 | 5934037.546 |
| White-naped Crane | -6233541.941 | 5924812.863 |
| White-naped Crane | -6174896.607 | 5932703.05  |
| White-naped Crane | -6176924.848 | 5920338.606 |
| White-naped Crane | -6177025.036 | 5934605.34  |
| White-naped Crane | -6174253.18  | 5934375.281 |
| White-naped Crane | -6233590.922 | 5924840.57  |
| White-naped Crane | -6176891.452 | 5920332.09  |
| White-naped Crane | -6177067.337 | 5934587.392 |
| White-naped Crane | -6174620.535 | 5932014.674 |
| White-naped Crane | -6177058.432 | 5931522.079 |
| White-naped Crane | -6176931.527 | 5920361.411 |
| White-naped Crane | -6233684.43  | 5924876.426 |

|                   |              |             |
|-------------------|--------------|-------------|
| White-naped Crane | -6174531.479 | 5931774.897 |
| White-naped Crane | -6177045.073 | 5934585.76  |
| White-naped Crane | -6177568.275 | 5932504.035 |
| White-naped Crane | -6174849.853 | 5935080.162 |
| White-naped Crane | -6177465.861 | 5919765.235 |
| White-naped Crane | -6173006.402 | 5930806.072 |
| White-naped Crane | -6233635.45  | 5925006.811 |
| White-naped Crane | -6174863.211 | 5935106.27  |
| White-naped Crane | -6176898.132 | 5920335.348 |
| White-naped Crane | -6173006.402 | 5930788.132 |
| White-naped Crane | -6177851.026 | 5932670.424 |
| White-naped Crane | -6233588.695 | 5924992.143 |
| White-naped Crane | -6178527.849 | 5933823.817 |
| White-naped Crane | -6174860.985 | 5935106.27  |
| White-naped Crane | -6175891.803 | 5930835.429 |
| White-naped Crane | -6176895.905 | 5920336.977 |
| White-naped Crane | -6177886.649 | 5932735.675 |
| White-naped Crane | -6233579.79  | 5924992.143 |
| White-naped Crane | -6178583.509 | 5933836.869 |
| White-naped Crane | -6174860.985 | 5935112.797 |
| White-naped Crane | -6233630.997 | 5925125.79  |
| White-naped Crane | -6178029.138 | 5932827.028 |
| White-naped Crane | -6175889.577 | 5930838.69  |
| White-naped Crane | -6176900.358 | 5920340.235 |
| White-naped Crane | -6178559.018 | 5933848.289 |
| White-naped Crane | -6178033.59  | 5932838.448 |
| White-naped Crane | -6176902.584 | 5920336.977 |
| White-naped Crane | -6174860.985 | 5935111.165 |
| White-naped Crane | -6233628.77  | 5925129.049 |
| White-naped Crane | -6175896.256 | 5930845.214 |
| White-naped Crane | -6178563.471 | 5933843.395 |
| White-naped Crane | -6233633.223 | 5925129.049 |
| White-naped Crane | -6174863.211 | 5935099.743 |
| White-naped Crane | -6176900.358 | 5920338.606 |
| White-naped Crane | -6178033.59  | 5932827.028 |
| White-naped Crane | -6175891.803 | 5930830.536 |
| White-naped Crane | -6178561.245 | 5933836.869 |
| White-naped Crane | -6174856.532 | 5935106.27  |
| White-naped Crane | -6176900.358 | 5920335.348 |
| White-naped Crane | -6175891.803 | 5930830.536 |
| White-naped Crane | -6178554.566 | 5933836.869 |
| White-naped Crane | -6178026.911 | 5932827.028 |
| White-naped Crane | -6174856.532 | 5935101.375 |
| White-naped Crane | -6175889.577 | 5930830.536 |
| White-naped Crane | -6178026.911 | 5932830.291 |
| White-naped Crane | -6176900.358 | 5920335.348 |
| White-naped Crane | -6178556.792 | 5933840.132 |
| White-naped Crane | -6233630.997 | 5925117.64  |
| White-naped Crane | -6178029.138 | 5932835.185 |
| White-naped Crane | -6174860.985 | 5935109.534 |
| White-naped Crane | -6233628.77  | 5925122.53  |
| White-naped Crane | -6175845.049 | 5930566.329 |
| White-naped Crane | -6176900.358 | 5920340.235 |
| White-naped Crane | -6178559.018 | 5933843.395 |
| White-naped Crane | -6178031.364 | 5932831.922 |
| White-naped Crane | -6174887.702 | 5935094.848 |
| White-naped Crane | -6175842.823 | 5930550.02  |
| White-naped Crane | -6178559.018 | 5933840.132 |

|                   |              |             |
|-------------------|--------------|-------------|
| White-naped Crane | -6176898.132 | 5920338.606 |
| White-naped Crane | -6233633.223 | 5925125.79  |
| White-naped Crane | -6178035.817 | 5932830.291 |
| White-naped Crane | -6174889.928 | 5935094.848 |
| White-naped Crane | -6233633.223 | 5925127.42  |
| White-naped Crane | -6175838.37  | 5930553.282 |
| White-naped Crane | -6176902.584 | 5920341.864 |
| White-naped Crane | -6178570.15  | 5933838.5   |
| White-naped Crane | -6174963.399 | 5932603.542 |
| White-naped Crane | -6177149.714 | 5933990.231 |
| White-naped Crane | -6174894.381 | 5935093.216 |
| White-naped Crane | -6177345.636 | 5919722.885 |
| White-naped Crane | -6233688.883 | 5924881.315 |
| White-naped Crane | -6175232.792 | 5929785.171 |
| White-naped Crane | -6174885.475 | 5935098.111 |
| White-naped Crane | -6176984.961 | 5918703.295 |
| White-naped Crane | -6233653.261 | 5924806.344 |
| White-naped Crane | -6171410.081 | 5936747.959 |
| White-naped Crane | -6177143.034 | 5933996.757 |
| White-naped Crane | -6175241.698 | 5929773.756 |
| White-naped Crane | -6177049.526 | 5934163.175 |
| White-naped Crane | -6171528.079 | 5937348.575 |
| White-naped Crane | -6233673.298 | 5924946.508 |
| White-naped Crane | -6176956.018 | 5918662.579 |
| White-naped Crane | -6177127.45  | 5933988.599 |
| White-naped Crane | -6175237.245 | 5929772.125 |
| White-naped Crane | -6174028.315 | 5934744.031 |
| White-naped Crane | -6177009.451 | 5934220.28  |
| White-naped Crane | -6231987.921 | 5923652.527 |
| White-naped Crane | -6176962.697 | 5918670.722 |
| White-naped Crane | -6177127.45  | 5933996.757 |
| White-naped Crane | -6175241.698 | 5929778.648 |
| White-naped Crane | -6174030.541 | 5934748.926 |
| White-naped Crane | -6174242.048 | 5934815.825 |
| White-naped Crane | -6176960.47  | 5918628.378 |
| White-naped Crane | -6176911.49  | 5934073.439 |
| White-naped Crane | -6175243.924 | 5929790.064 |
| White-naped Crane | -6231963.431 | 5923579.197 |
| White-naped Crane | -6176921.509 | 5934045.703 |
| White-naped Crane | -6175241.698 | 5929786.802 |
| White-naped Crane | -6176694.417 | 5918864.532 |
| White-naped Crane | -6176717.794 | 5918898.734 |
| White-naped Crane | -6174754.118 | 5934804.403 |
| White-naped Crane | -6176913.716 | 5934287.175 |
| White-naped Crane | -6175250.603 | 5929793.325 |
| White-naped Crane | -6177122.997 | 5933986.968 |
| White-naped Crane | -6174865.438 | 5934773.401 |
| White-naped Crane | -6176922.622 | 5934288.806 |
| White-naped Crane | -6176702.209 | 5918892.219 |
| White-naped Crane | -6175246.15  | 5929850.401 |
| White-naped Crane | -6177125.223 | 5933991.863 |
| White-naped Crane | -6246141.081 | 5904615.638 |
| White-naped Crane | -6177254.354 | 5933796.081 |
| White-naped Crane | -6176951.565 | 5934287.175 |
| White-naped Crane | -6176682.172 | 5918825.444 |
| White-naped Crane | -6246147.76  | 5904631.898 |
| White-naped Crane | -6175243.924 | 5929863.447 |
| White-naped Crane | -6177149.714 | 5933384.954 |

|                   |              |             |
|-------------------|--------------|-------------|
| White-naped Crane | -6176976.055 | 5934096.281 |
| White-naped Crane | -6175310.716 | 5931293.733 |
| White-naped Crane | -6176717.794 | 5918900.363 |
| White-naped Crane | -6246145.534 | 5904636.776 |
| White-naped Crane | -6176971.602 | 5934094.65  |
| White-naped Crane | -6177232.09  | 5933004.843 |
| White-naped Crane | -6245853.877 | 5904716.45  |
| White-naped Crane | -6176982.734 | 5934119.123 |
| White-naped Crane | -6176706.662 | 5918898.734 |
| White-naped Crane | -6175308.489 | 5931243.172 |
| White-naped Crane | -6177042.847 | 5934166.438 |
| White-naped Crane | -6179028.787 | 5932233.252 |
| White-naped Crane | -6176711.115 | 5918900.363 |
| White-naped Crane | -6175315.168 | 5931243.172 |
| White-naped Crane | -6176987.187 | 5934130.544 |
| White-naped Crane | -6176757.869 | 5918869.418 |
| White-naped Crane | -6177120.771 | 5934138.702 |
| White-naped Crane | -6223690.166 | 5895774.783 |
| White-naped Crane | -6177962.346 | 5930659.29  |
| White-naped Crane | -6176980.508 | 5934109.334 |
| White-naped Crane | -6175308.489 | 5931244.803 |
| White-naped Crane | -6176842.472 | 5918727.725 |
| White-naped Crane | -6220671.182 | 5897134.452 |
| White-naped Crane | -6171706.19  | 5937056.422 |
| White-naped Crane | -6176913.716 | 5934057.124 |
| White-naped Crane | -6175359.696 | 5931200.765 |
| White-naped Crane | -6175072.492 | 5932314.812 |
| White-naped Crane | -6224551.779 | 5897191.312 |
| White-naped Crane | -6176833.566 | 5918750.526 |
| White-naped Crane | -6175724.824 | 5934070.176 |
| White-naped Crane | -6171675.021 | 5937044.997 |
| White-naped Crane | -6175319.621 | 5931182.824 |
| White-naped Crane | -6175738.182 | 5934053.861 |
| White-naped Crane | -6178648.074 | 5931729.226 |
| White-naped Crane | -6224545.1   | 5897189.688 |
| White-naped Crane | -6176964.923 | 5918623.492 |
| White-naped Crane | -6174729.628 | 5935303.713 |
| White-naped Crane | -6175731.503 | 5934045.703 |
| White-naped Crane | -6178668.111 | 5931739.013 |
| White-naped Crane | -6224529.515 | 5897155.571 |
| White-naped Crane | -6174718.496 | 5935290.659 |
| White-naped Crane | -6176967.15  | 5918625.12  |
| White-naped Crane | -6175631.316 | 5930961.011 |
| White-naped Crane | -6224520.61  | 5897163.694 |
| White-naped Crane | -6178768.299 | 5931973.895 |
| White-naped Crane | -6175733.73  | 5934057.124 |
| White-naped Crane | -6176964.923 | 5918621.863 |
| White-naped Crane | -6175807.201 | 5931057.238 |
| White-naped Crane | -6174718.496 | 5935293.922 |
| White-naped Crane | -6176962.697 | 5918630.006 |
| White-naped Crane | -6224527.289 | 5897166.944 |
| White-naped Crane | -6178770.525 | 5931978.789 |
| White-naped Crane | -6175738.182 | 5934058.756 |
| White-naped Crane | -6174727.401 | 5935298.818 |
| White-naped Crane | -6175800.521 | 5931058.869 |
| White-naped Crane | -6175735.956 | 5934058.756 |
| White-naped Crane | -6176962.697 | 5918623.492 |
| White-naped Crane | -6178770.525 | 5931972.264 |

|                   |              |             |
|-------------------|--------------|-------------|
| White-naped Crane | -6175800.521 | 5931057.238 |
| White-naped Crane | -6174707.364 | 5935289.027 |
| White-naped Crane | -6224527.289 | 5897162.07  |
| White-naped Crane | -6175802.748 | 5931055.607 |
| White-naped Crane | -6176960.47  | 5918626.749 |
| White-naped Crane | -6175740.409 | 5934052.229 |
| White-naped Crane | -6178766.073 | 5931972.264 |
| White-naped Crane | -6224527.289 | 5897158.821 |
| White-naped Crane | -6174745.213 | 5935285.764 |
| White-naped Crane | -6178768.299 | 5931967.371 |
| White-naped Crane | -6176956.018 | 5918625.12  |
| White-naped Crane | -6175798.295 | 5931053.976 |
| White-naped Crane | -6175733.73  | 5934055.492 |
| White-naped Crane | -6224520.61  | 5897163.694 |
| White-naped Crane | -6174689.553 | 5935285.764 |
| White-naped Crane | -6175800.521 | 5931055.607 |
| White-naped Crane | -6178768.299 | 5931973.895 |
| White-naped Crane | -6175735.956 | 5934062.019 |
| White-naped Crane | -6176962.697 | 5918625.12  |
| White-naped Crane | -6224520.61  | 5897162.07  |
| White-naped Crane | -6174729.628 | 5935289.027 |
| White-naped Crane | -6224522.836 | 5897162.07  |
| White-naped Crane | -6178766.073 | 5931972.264 |
| White-naped Crane | -6175800.521 | 5931057.238 |
| White-naped Crane | -6176964.923 | 5918625.12  |
| White-naped Crane | -6175735.956 | 5934058.756 |
| White-naped Crane | -6174711.817 | 5935279.236 |
| White-naped Crane | -6175811.653 | 5931062.131 |
| White-naped Crane | -6175738.182 | 5934053.861 |
| White-naped Crane | -6178768.299 | 5931970.633 |
| White-naped Crane | -6176964.923 | 5918625.12  |
| White-naped Crane | -6224527.289 | 5897162.07  |
| White-naped Crane | -6174720.722 | 5935293.922 |
| White-naped Crane | -6177719.669 | 5919411.783 |
| White-naped Crane | -6171510.268 | 5937505.264 |
| White-naped Crane | -6223440.811 | 5895836.508 |
| White-naped Crane | -6178783.884 | 5932159.848 |
| White-naped Crane | -6175555.618 | 5931084.965 |
| White-naped Crane | -6177590.539 | 5919590.95  |
| White-naped Crane | -6178113.74  | 5931336.14  |
| White-naped Crane | -6175733.73  | 5934066.913 |
| White-naped Crane | -6223567.715 | 5895917.725 |
| White-naped Crane | -6175531.128 | 5931111.061 |
| White-naped Crane | -6173701.036 | 5935222.125 |
| White-naped Crane | -6176829.113 | 5920004.678 |
| White-naped Crane | -6177951.214 | 5932295.238 |
| White-naped Crane | -6175551.166 | 5931084.965 |
| White-naped Crane | -6174224.237 | 5934531.916 |
| White-naped Crane | -6171363.326 | 5936682.677 |
| White-naped Crane | -6224262.348 | 5902242.021 |
| White-naped Crane | -6174388.99  | 5931256.22  |
| White-naped Crane | -6174179.71  | 5934548.232 |
| White-naped Crane | -6171097.273 | 5936290.996 |
| White-naped Crane | -6224513.931 | 5897179.94  |
| White-naped Crane | -6174235.369 | 5934491.125 |
| White-naped Crane | -6174346.689 | 5934407.913 |
| White-naped Crane | -6173683.225 | 5931753.693 |
| White-naped Crane | -6173643.15  | 5931750.431 |



|                   |              |             |
|-------------------|--------------|-------------|
| White-naped Crane | -6173642.036 | 5931747.169 |
| White-naped Crane | -6176353.779 | 5918970.396 |
| White-naped Crane | -6174355.594 | 5934378.544 |
| White-naped Crane | -6171270.931 | 5936266.516 |
| White-naped Crane | -6224554.006 | 5897192.937 |
| White-naped Crane | -6174232.03  | 5934491.125 |
| White-naped Crane | -6178380.907 | 5932517.085 |
| White-naped Crane | -6177098.507 | 5934053.861 |
| White-naped Crane | -6224578.496 | 5897223.804 |
| White-naped Crane | -6187925.44  | 5948201.153 |
| White-naped Crane | -6176349.326 | 5918975.282 |
| White-naped Crane | -6173545.188 | 5931696.604 |
| White-naped Crane | -6178448.812 | 5932768.301 |
| White-naped Crane | -6224549.553 | 5897186.439 |
| White-naped Crane | -6187931.006 | 5948214.227 |
| White-naped Crane | -6177107.412 | 5934063.65  |
| White-naped Crane | -6173530.717 | 5931714.546 |
| White-naped Crane | -6178171.627 | 5933450.211 |
| White-naped Crane | -6176350.44  | 5918999.713 |
| White-naped Crane | -6205797.785 | 5939064.152 |
| White-naped Crane | -6177040.62  | 5933903.76  |
| White-naped Crane | -6224542.874 | 5897199.435 |
| White-naped Crane | -6173557.434 | 5931701.498 |
| White-naped Crane | -6176605.361 | 5918771.698 |
| White-naped Crane | -6178111.514 | 5933466.526 |
| White-naped Crane | -6173549.641 | 5931699.867 |
| White-naped Crane | -6177017.243 | 5933830.343 |
| White-naped Crane | -6224564.024 | 5897228.678 |
| White-naped Crane | -6178199.456 | 5933226.709 |
| White-naped Crane | -6177030.602 | 5933853.184 |
| White-naped Crane | -6203389.944 | 5942948.725 |
| White-naped Crane | -6173531.83  | 5931724.333 |
| White-naped Crane | -6177072.903 | 5933849.921 |
| White-naped Crane | -6176599.795 | 5918776.584 |
| White-naped Crane | -6203365.454 | 5942868.697 |
| White-naped Crane | -6173554.094 | 5931709.653 |
| White-naped Crane | -6178732.677 | 5932861.286 |
| White-naped Crane | -6203392.17  | 5942700.478 |
| White-naped Crane | -6176579.758 | 5918776.584 |
| White-naped Crane | -6177124.11  | 5933931.496 |
| White-naped Crane | -6226254.967 | 5897538.982 |
| White-naped Crane | -6173522.925 | 5931724.333 |
| White-naped Crane | -6178700.394 | 5932802.559 |
| White-naped Crane | -6177033.941 | 5933949.443 |
| White-naped Crane | -6176589.777 | 5918747.268 |
| White-naped Crane | -6200949.821 | 5938576.051 |
| White-naped Crane | -6226309.514 | 5897423.632 |
| White-naped Crane | -6178294.078 | 5932696.524 |
| White-naped Crane | -6226283.91  | 5897566.601 |
| White-naped Crane | -6177234.316 | 5934024.493 |
| White-naped Crane | -6201619.964 | 5938148.373 |
| White-naped Crane | -6178354.19  | 5932654.111 |
| White-naped Crane | -6175845.049 | 5930996.892 |
| White-naped Crane | -6177249.901 | 5934003.283 |
| White-naped Crane | -6226288.363 | 5897564.977 |
| White-naped Crane | -6201633.322 | 5938150.006 |
| White-naped Crane | -6178351.964 | 5932659.005 |
| White-naped Crane | -6226283.91  | 5897568.226 |

|                   |              |             |
|-------------------|--------------|-------------|
| White-naped Crane | -6201628.87  | 5938150.006 |
| White-naped Crane | -6175833.917 | 5930980.583 |
| White-naped Crane | -6177254.354 | 5934003.283 |
| White-naped Crane | -6178365.322 | 5932645.955 |
| White-naped Crane | -6226257.194 | 5897564.977 |
| White-naped Crane | -6201628.87  | 5938161.432 |
| White-naped Crane | -6175845.049 | 5931016.464 |
| White-naped Crane | -6178372.002 | 5932637.798 |
| White-naped Crane | -6177245.448 | 5934000.02  |
| White-naped Crane | -6226210.44  | 5897490.243 |
| White-naped Crane | -6201631.096 | 5938156.535 |
| White-naped Crane | -6185362.866 | 5929930.308 |
| White-naped Crane | -6177243.222 | 5934003.283 |
| White-naped Crane | -6201626.643 | 5938148.373 |
| White-naped Crane | -6226199.308 | 5897498.366 |
| White-naped Crane | -6175856.181 | 5931009.94  |
| White-naped Crane | -6178363.096 | 5932644.324 |
| White-naped Crane | -6226201.534 | 5897498.366 |
| White-naped Crane | -6201617.738 | 5938150.006 |
| White-naped Crane | -6177247.675 | 5934000.02  |
| White-naped Crane | -6185349.507 | 5929917.262 |
| White-naped Crane | -6175825.012 | 5930987.107 |
| White-naped Crane | -6178367.549 | 5932645.955 |
| White-naped Crane | -6185356.186 | 5929920.523 |
| White-naped Crane | -6177252.128 | 5934001.652 |
| White-naped Crane | -6226201.534 | 5897498.366 |
| White-naped Crane | -6178358.643 | 5932649.217 |
| White-naped Crane | -6201628.87  | 5938151.638 |
| White-naped Crane | -6175836.144 | 5931001.785 |
| White-naped Crane | -6185353.96  | 5929928.677 |
| White-naped Crane | -6226295.042 | 5897584.473 |
| White-naped Crane | -6177245.448 | 5933995.126 |
| White-naped Crane | -6178365.322 | 5932637.798 |
| White-naped Crane | -6201631.096 | 5938146.741 |
| White-naped Crane | -6175829.464 | 5931000.154 |
| White-naped Crane | -6178363.096 | 5932642.692 |
| White-naped Crane | -6185398.488 | 5929933.569 |
| White-naped Crane | -6176624.286 | 5918750.526 |
| White-naped Crane | -6226297.269 | 5897581.223 |
| White-naped Crane | -6177245.448 | 5934000.02  |
| White-naped Crane | -6201631.096 | 5938150.006 |
| White-naped Crane | -6175836.144 | 5930936.547 |
| White-naped Crane | -6185333.923 | 5929914     |
| White-naped Crane | -6176597.569 | 5918753.783 |
| White-naped Crane | -6178149.363 | 5932654.111 |
| White-naped Crane | -6177138.582 | 5934016.336 |
| White-naped Crane | -6226312.853 | 5897503.24  |
| White-naped Crane | -6175802.748 | 5930975.69  |
| White-naped Crane | -6201624.417 | 5938148.373 |
| White-naped Crane | -6223425.226 | 5895862.497 |
| White-naped Crane | -6177252.128 | 5934045.703 |
| White-naped Crane | -6176481.797 | 5918840.102 |
| White-naped Crane | -6172806.027 | 5936978.081 |
| White-naped Crane | -6201622.19  | 5938146.741 |
| White-naped Crane | -6176481.797 | 5918833.587 |
| White-naped Crane | -6177261.033 | 5933991.863 |
| White-naped Crane | -6172193.77  | 5937802.329 |
| White-naped Crane | -6201628.87  | 5938141.844 |

|                   |              |             |
|-------------------|--------------|-------------|
| White-naped Crane | -6223474.206 | 5895868.995 |
| White-naped Crane | -6137838.349 | 5940074.724 |
| White-naped Crane | -6173870.241 | 5931406.274 |
| White-naped Crane | -6177421.333 | 5933880.919 |
| White-naped Crane | -6176488.476 | 5918838.473 |
| White-naped Crane | -6172015.659 | 5937684.808 |
| White-naped Crane | -6137851.707 | 5940082.887 |
| White-naped Crane | -6223431.905 | 5895745.546 |
| White-naped Crane | -6173861.336 | 5931409.536 |
| White-naped Crane | -6177386.824 | 5933805.87  |
| White-naped Crane | -6201623.304 | 5938136.947 |
| White-naped Crane | -6176490.702 | 5918846.617 |
| White-naped Crane | -6177343.409 | 5933800.976 |
| White-naped Crane | -6172011.206 | 5937696.233 |
| White-naped Crane | -6223545.451 | 5895756.916 |
| White-naped Crane | -6173805.676 | 5931398.119 |
| White-naped Crane | -6172094.696 | 5937559.127 |
| White-naped Crane | -6223700.185 | 5895817.016 |
| White-naped Crane | -6176558.607 | 5918939.451 |
| White-naped Crane | -6177252.128 | 5934050.598 |
| White-naped Crane | -6174262.086 | 5936398.706 |
| White-naped Crane | -6223723.562 | 5895739.048 |
| White-naped Crane | -6176564.173 | 5918947.595 |
| White-naped Crane | -6173801.223 | 5931430.74  |
| White-naped Crane | -6177574.954 | 5919708.225 |
| White-naped Crane | -6224531.742 | 5897175.066 |
| White-naped Crane | -6177501.483 | 5933918.444 |
| White-naped Crane | -6173798.997 | 5936899.741 |
| White-naped Crane | -6173754.469 | 5931411.167 |
| White-naped Crane | -6174337.783 | 5936586.387 |
| White-naped Crane | -6177577.18  | 5919704.968 |
| White-naped Crane | -6224605.213 | 5897272.542 |
| White-naped Crane | -6177240.996 | 5934050.598 |
| White-naped Crane | -6176846.925 | 5934355.702 |
| White-naped Crane | -6173770.054 | 5931450.312 |
| White-naped Crane | -6174413.48  | 5936393.81  |
| White-naped Crane | -6170808.955 | 5936261.621 |
| White-naped Crane | -6176855.83  | 5934368.754 |
| White-naped Crane | -6177572.728 | 5919704.968 |
| White-naped Crane | -6223449.716 | 5895893.36  |
| White-naped Crane | -6173674.319 | 5931460.099 |
| White-naped Crane | -6174440.197 | 5936377.491 |
| White-naped Crane | -6177572.728 | 5919693.566 |
| White-naped Crane | -6170742.164 | 5936106.586 |
| White-naped Crane | -6223687.94  | 5895864.122 |
| White-naped Crane | -6176846.925 | 5934329.596 |
| White-naped Crane | -6173727.752 | 5931463.361 |
| White-naped Crane | -6171134.008 | 5936284.468 |
| White-naped Crane | -6176935.98  | 5934300.227 |
| White-naped Crane | -6176604.248 | 5918722.839 |
| White-naped Crane | -6223607.79  | 5895862.497 |
| White-naped Crane | -6174446.876 | 5936390.546 |
| White-naped Crane | -6174458.008 | 5936356.275 |
| White-naped Crane | -6171220.838 | 5936153.912 |
| White-naped Crane | -6223443.037 | 5895877.117 |
| White-naped Crane | -6176602.022 | 5918719.581 |
| White-naped Crane | -6176947.112 | 5934306.754 |
| White-naped Crane | -6173511.793 | 5931755.324 |

|                   |              |             |
|-------------------|--------------|-------------|
| White-naped Crane | -6176586.437 | 5918678.865 |
| White-naped Crane | -6223739.147 | 5895709.811 |
| White-naped Crane | -6174571.554 | 5936349.747 |
| White-naped Crane | -6175027.964 | 5934509.073 |
| White-naped Crane | -6173567.452 | 5931681.925 |
| White-naped Crane | -6174814.231 | 5936555.378 |
| White-naped Crane | -6176357.119 | 5918968.768 |
| White-naped Crane | -6173516.245 | 5931714.546 |
| White-naped Crane | -6175094.756 | 5934125.649 |
| White-naped Crane | -6174631.667 | 5936816.505 |
| White-naped Crane | -6176564.173 | 5918708.181 |
| White-naped Crane | -6223995.182 | 5897758.314 |
| White-naped Crane | -6179661.081 | 5933360.483 |
| White-naped Crane | -6175036.87  | 5931024.619 |
| White-naped Crane | -6175110.341 | 5934122.386 |
| White-naped Crane | -6174613.856 | 5936826.297 |
| White-naped Crane | -6175112.567 | 5934128.912 |
| White-naped Crane | -6179442.895 | 5933198.975 |
| White-naped Crane | -6175764.899 | 5930863.154 |
| White-naped Crane | -6176622.059 | 5918719.581 |
| White-naped Crane | -6224471.629 | 5897269.293 |
| White-naped Crane | -6174618.308 | 5936854.043 |
| White-naped Crane | -6175112.567 | 5934133.807 |
| White-naped Crane | -6179440.669 | 5933202.238 |
| White-naped Crane | -6176622.059 | 5918721.21  |
| White-naped Crane | -6175767.126 | 5930866.416 |
| White-naped Crane | -6224464.95  | 5897266.044 |
| White-naped Crane | -6174645.025 | 5936860.571 |
| White-naped Crane | -6179445.121 | 5933203.869 |
| White-naped Crane | -6224469.403 | 5897272.542 |
| White-naped Crane | -6175117.02  | 5934135.438 |
| White-naped Crane | -6175753.767 | 5930864.785 |
| White-naped Crane | -6174613.856 | 5936839.354 |
| White-naped Crane | -6176628.738 | 5918709.809 |
| White-naped Crane | -6175288.452 | 5933924.97  |
| White-naped Crane | -6224473.856 | 5897261.17  |
| White-naped Crane | -6179449.574 | 5933194.081 |
| White-naped Crane | -6175760.446 | 5930859.893 |
| White-naped Crane | -6174604.95  | 5936827.929 |
| White-naped Crane | -6175281.773 | 5933934.759 |
| White-naped Crane | -6176626.512 | 5918709.809 |
| White-naped Crane | -6224516.157 | 5897173.442 |
| White-naped Crane | -6179440.669 | 5933200.606 |
| White-naped Crane | -6175749.314 | 5930869.678 |
| White-naped Crane | -6174587.139 | 5936844.25  |
| White-naped Crane | -6176626.512 | 5918716.324 |
| White-naped Crane | -6179436.216 | 5933203.869 |
| White-naped Crane | -6224480.535 | 5897223.804 |
| White-naped Crane | -6175292.904 | 5933941.285 |
| White-naped Crane | -6175758.22  | 5930846.845 |
| White-naped Crane | -6174598.271 | 5936839.354 |
| White-naped Crane | -6176626.512 | 5918722.839 |
| White-naped Crane | -6179440.669 | 5933202.238 |
| White-naped Crane | -6175281.773 | 5933936.391 |
| White-naped Crane | -6224491.667 | 5897214.057 |
| White-naped Crane | -6174620.535 | 5936842.618 |
| White-naped Crane | -6176624.286 | 5918717.953 |
| White-naped Crane | -6179442.895 | 5933203.869 |

|                   |              |             |
|-------------------|--------------|-------------|
| White-naped Crane | -6224522.836 | 5897183.189 |
| White-naped Crane | -6175290.678 | 5933942.917 |
| White-naped Crane | -6175747.088 | 5930872.94  |
| White-naped Crane | -6174611.629 | 5936836.09  |
| White-naped Crane | -6179445.121 | 5933202.238 |
| White-naped Crane | -6224520.61  | 5897170.193 |
| White-naped Crane | -6176624.286 | 5918724.467 |
| White-naped Crane | -6175290.678 | 5933938.022 |
| White-naped Crane | -6175749.314 | 5930872.94  |
| White-naped Crane | -6174616.082 | 5936831.194 |
| White-naped Crane | -6179162.37  | 5933220.183 |
| White-naped Crane | -6176626.512 | 5918719.581 |
| White-naped Crane | -6226361.834 | 5900189.206 |
| White-naped Crane | -6170679.825 | 5936597.811 |
| White-naped Crane | -6173658.734 | 5930998.523 |
| White-naped Crane | -6174618.308 | 5936836.09  |
| White-naped Crane | -6176606.474 | 5918729.353 |
| White-naped Crane | -6178485.547 | 5934109.334 |
| White-naped Crane | -6226319.533 | 5900036.442 |
| White-naped Crane | -6173522.925 | 5931057.238 |
| White-naped Crane | -6170677.598 | 5936547.218 |
| White-naped Crane | -6177501.483 | 5933838.5   |
| White-naped Crane | -6174555.969 | 5936927.486 |
| White-naped Crane | -6226250.515 | 5897529.234 |
| White-naped Crane | -6176597.569 | 5918726.096 |
| White-naped Crane | -6170232.32  | 5936849.146 |
| White-naped Crane | -6173518.472 | 5931063.762 |
| White-naped Crane | -6174551.517 | 5936924.222 |
| White-naped Crane | -6176403.873 | 5919001.341 |
| White-naped Crane | -6178345.285 | 5933396.374 |
| White-naped Crane | -6170216.736 | 5936873.627 |
| White-naped Crane | -6226257.194 | 5897537.358 |
| White-naped Crane | -6173445.001 | 5931032.774 |
| White-naped Crane | -6178405.397 | 5933234.866 |
| White-naped Crane | -6172253.882 | 5945510.006 |
| White-naped Crane | -6174558.196 | 5936942.175 |
| White-naped Crane | -6226286.137 | 5897498.366 |
| White-naped Crane | -6178717.092 | 5932970.585 |
| White-naped Crane | -6170911.369 | 5936516.21  |
| White-naped Crane | -6176408.326 | 5919006.228 |
| White-naped Crane | -6173378.209 | 5931331.247 |
| White-naped Crane | -6174580.46  | 5934179.491 |
| White-naped Crane | -6226293.929 | 5897436.629 |
| White-naped Crane | -6173357.059 | 5931318.198 |
| White-naped Crane | -6176421.684 | 5919009.485 |
| White-naped Crane | -6172231.618 | 5945470.797 |
| White-naped Crane | -6174535.932 | 5936901.373 |
| White-naped Crane | -6174604.95  | 5934151.754 |
| White-naped Crane | -6176421.684 | 5919007.856 |
| White-naped Crane | -6178774.978 | 5932851.498 |
| White-naped Crane | -6173349.266 | 5931319.829 |
| White-naped Crane | -6174544.837 | 5936934.015 |
| White-naped Crane | -6177252.128 | 5934040.809 |
| White-naped Crane | -6174527.026 | 5934182.754 |
| White-naped Crane | -6226234.93  | 5897517.862 |
| White-naped Crane | -6173331.455 | 5931319.829 |
| White-naped Crane | -6172238.298 | 5945475.698 |
| White-naped Crane | -6174542.611 | 5936891.58  |

|                   |              |             |
|-------------------|--------------|-------------|
| White-naped Crane | -6172334.032 | 5945477.332 |
| White-naped Crane | -6177122.997 | 5934143.596 |
| White-naped Crane | -6226268.326 | 5897534.108 |
| White-naped Crane | -6173371.53  | 5931329.616 |
| White-naped Crane | -6174021.636 | 5939958.804 |
| White-naped Crane | -6191405.288 | 5988971.88  |
| White-naped Crane | -6225807.463 | 5898128.753 |
| White-naped Crane | -6172365.202 | 5945459.361 |
| White-naped Crane | -6173333.681 | 5931342.664 |
| White-naped Crane | -6177042.847 | 5934166.438 |
| White-naped Crane | -6177951.214 | 5932774.827 |
| White-naped Crane | -6192135.543 | 5988929.188 |
| White-naped Crane | -6177022.809 | 5933936.391 |
| White-naped Crane | -6226050.139 | 5898432.59  |
| White-naped Crane | -6174820.91  | 5940551.48  |
| White-naped Crane | -6172371.881 | 5945464.262 |
| White-naped Crane | -6173358.172 | 5931376.915 |
| White-naped Crane | -6177786.461 | 5932600.279 |
| White-naped Crane | -6174295.482 | 5943040.186 |
| White-naped Crane | -6192151.128 | 5988935.756 |
| White-naped Crane | -6177082.922 | 5933862.973 |
| White-naped Crane | -6225985.574 | 5898257.111 |
| White-naped Crane | -6173353.719 | 5931331.247 |
| White-naped Crane | -6172044.602 | 5944663.784 |
| White-naped Crane | -6177069.564 | 5933866.236 |
| White-naped Crane | -6178792.789 | 5932110.913 |
| White-naped Crane | -6192115.506 | 5988940.682 |
| White-naped Crane | -6174627.214 | 5944226.003 |
| White-naped Crane | -6191240.535 | 5989141.007 |
| White-naped Crane | -6178872.939 | 5932559.498 |
| White-naped Crane | -6215200.942 | 5941856.165 |
| White-naped Crane | -6173485.076 | 5931282.316 |
| White-naped Crane | -6171712.87  | 5944034.889 |
| White-naped Crane | -6191937.395 | 5989067.116 |
| White-naped Crane | -6178728.224 | 5932843.341 |
| White-naped Crane | -6204549.893 | 5949240.582 |
| White-naped Crane | -6171009.33  | 5937351.839 |
| White-naped Crane | -6191169.29  | 5988916.052 |
| White-naped Crane | -6178959.769 | 5932892.281 |
| White-naped Crane | -6204812.607 | 5948277.962 |
| White-naped Crane | -6172645.727 | 5945225.745 |
| White-naped Crane | -6172627.916 | 5945224.111 |
| White-naped Crane | -6191229.403 | 5988943.966 |
| White-naped Crane | -6178162.721 | 5933926.602 |
| White-naped Crane | -6178772.752 | 5932849.867 |
| White-naped Crane | -6204935.058 | 5947844.899 |
| White-naped Crane | -6174640.572 | 5944337.08  |
| White-naped Crane | -6175733.73  | 5931011.571 |
| White-naped Crane | -6172639.048 | 5945230.646 |
| White-naped Crane | -6174640.572 | 5944324.012 |
| White-naped Crane | -6178162.721 | 5933923.339 |
| White-naped Crane | -6204937.285 | 5947848.168 |
| White-naped Crane | -6191233.856 | 5988962.028 |
| White-naped Crane | -6175738.182 | 5931008.309 |
| White-naped Crane | -6178779.431 | 5932861.286 |
| White-naped Crane | -6191229.403 | 5988953.818 |
| White-naped Crane | -6174651.704 | 5944343.614 |
| White-naped Crane | -6178164.947 | 5933913.549 |

|                   |              |             |
|-------------------|--------------|-------------|
| White-naped Crane | -6204941.738 | 5947864.509 |
| White-naped Crane | -6175724.824 | 5930996.892 |
| White-naped Crane | -6178783.884 | 5932871.074 |
| White-naped Crane | -6174616.082 | 5944309.311 |
| White-naped Crane | -6191229.403 | 5988943.966 |
| White-naped Crane | -6172683.576 | 5945204.507 |
| White-naped Crane | -6178169.4   | 5933910.286 |
| White-naped Crane | -6204928.379 | 5947812.216 |
| White-naped Crane | -6178786.11  | 5932856.392 |
| White-naped Crane | -6175740.409 | 5931013.202 |
| White-naped Crane | -6172676.896 | 5945204.507 |
| White-naped Crane | -6174607.176 | 5944294.609 |
| White-naped Crane | -6178173.853 | 5933915.181 |
| White-naped Crane | -6191229.403 | 5988947.25  |
| White-naped Crane | -6178783.884 | 5932856.392 |
| White-naped Crane | -6204928.379 | 5947624.291 |
| White-naped Crane | -6175722.598 | 5931003.416 |
| White-naped Crane | -6174618.308 | 5944337.08  |
| White-naped Crane | -6191229.403 | 5988948.892 |
| White-naped Crane | -6178164.947 | 5933916.812 |
| White-naped Crane | -6178786.11  | 5932861.286 |
| White-naped Crane | -6204937.285 | 5947625.925 |
| White-naped Crane | -6175731.503 | 5931005.047 |
| White-naped Crane | -6172665.764 | 5945229.012 |
| White-naped Crane | -6178167.174 | 5933916.812 |
| White-naped Crane | -6191222.724 | 5988940.682 |
| White-naped Crane | -6178786.11  | 5932862.917 |
| White-naped Crane | -6204930.606 | 5947632.462 |
| White-naped Crane | -6174631.667 | 5944302.777 |
| White-naped Crane | -6175735.956 | 5931009.94  |
| White-naped Crane | -6174611.629 | 5944319.112 |
| White-naped Crane | -6178169.4   | 5933916.812 |
| White-naped Crane | -6191218.271 | 5988937.398 |
| White-naped Crane | -6204930.606 | 5947630.827 |
| White-naped Crane | -6178786.11  | 5932862.917 |
| White-naped Crane | -6172679.123 | 5945202.874 |
| White-naped Crane | -6175738.182 | 5931006.678 |
| White-naped Crane | -6172676.896 | 5945199.606 |
| White-naped Crane | -6174631.667 | 5944312.578 |
| White-naped Crane | -6191222.724 | 5988945.608 |
| White-naped Crane | -6178167.174 | 5933918.444 |
| White-naped Crane | -6178714.866 | 5932858.023 |
| White-naped Crane | -6204536.535 | 5946839.952 |
| White-naped Crane | -6175731.503 | 5931006.678 |
| White-naped Crane | -6174747.439 | 5944217.836 |
| White-naped Crane | -6191222.724 | 5988939.04  |
| White-naped Crane | -6178193.89  | 5934155.017 |
| White-naped Crane | -6170764.428 | 5937619.519 |
| White-naped Crane | -6199520.478 | 5951058.251 |
| White-naped Crane | -6172527.728 | 5944993.768 |
| White-naped Crane | -6173404.926 | 5931479.671 |
| White-naped Crane | -6174740.76  | 5944212.936 |
| White-naped Crane | -6191783.774 | 5988917.694 |
| White-naped Crane | -6170715.447 | 5937573.817 |
| White-naped Crane | -6172527.728 | 5944970.898 |
| White-naped Crane | -6173391.568 | 5931458.468 |
| White-naped Crane | -6196042.858 | 5946652.048 |
| White-naped Crane | -6170724.353 | 5936217.558 |

|                   |              |             |
|-------------------|--------------|-------------|
| White-naped Crane | -6170773.333 | 5937518.322 |
| White-naped Crane | -6174742.986 | 5944222.736 |
| White-naped Crane | -6173042.024 | 5946371.016 |
| White-naped Crane | -6191966.338 | 5988705.88  |
| White-naped Crane | -6173095.458 | 5946446.175 |
| White-naped Crane | -6174827.589 | 5944333.813 |
| White-naped Crane | -6178396.492 | 5932864.549 |
| White-naped Crane | -6191984.149 | 5988687.819 |
| White-naped Crane | -6193591.602 | 5944604.977 |
| White-naped Crane | -6174669.515 | 5933822.185 |
| White-naped Crane | -6173449.454 | 5931434.002 |
| White-naped Crane | -6174799.759 | 5944307.677 |
| White-naped Crane | -6192062.073 | 5988612.29  |
| White-naped Crane | -6178396.492 | 5932871.074 |
| White-naped Crane | -6173035.345 | 5946480.487 |
| White-naped Crane | -6173433.869 | 5931509.03  |
| White-naped Crane | -6173449.454 | 5931425.847 |
| White-naped Crane | -6174801.986 | 5944306.044 |
| White-naped Crane | -6178369.775 | 5932791.14  |
| White-naped Crane | -6173025.326 | 5946483.755 |
| White-naped Crane | -6173436.095 | 5931464.992 |
| White-naped Crane | -6194096.993 | 5944459.593 |
| White-naped Crane | -6173020.874 | 5946488.656 |
| White-naped Crane | -6174816.457 | 5944412.221 |
| White-naped Crane | -6175025.738 | 5933766.714 |
| White-naped Crane | -6178287.399 | 5932693.262 |
| White-naped Crane | -6192229.052 | 5988653.338 |
| White-naped Crane | -6174842.061 | 5944456.326 |
| White-naped Crane | -6192351.503 | 5988817.533 |
| White-naped Crane | -6173024.213 | 5946482.121 |
| White-naped Crane | -6178768.299 | 5932858.023 |
| White-naped Crane | -6175604.599 | 5933722.664 |
| White-naped Crane | -6173445.001 | 5931491.089 |
| White-naped Crane | -6172980.799 | 5946472.317 |
| White-naped Crane | -6174860.985 | 5944459.593 |
| White-naped Crane | -6178694.828 | 5932771.564 |
| White-naped Crane | -6192353.73  | 5988843.805 |
| White-naped Crane | -6177062.884 | 5933866.236 |
| White-naped Crane | -6192215.693 | 5943646.141 |
| White-naped Crane | -6173442.775 | 5931438.895 |
| White-naped Crane | -6174823.136 | 5944451.425 |
| White-naped Crane | -6177229.864 | 5934022.862 |
| White-naped Crane | -6173000.836 | 5946475.585 |
| White-naped Crane | -6193894.391 | 5944632.747 |
| White-naped Crane | -6192320.334 | 5988835.595 |
| White-naped Crane | -6173391.568 | 5931349.188 |
| White-naped Crane | -6174817.57  | 5944451.425 |
| White-naped Crane | -6192331.466 | 5988881.57  |
| White-naped Crane | -6178249.55  | 5932593.754 |
| White-naped Crane | -6177243.222 | 5934008.178 |
| White-naped Crane | -6173005.289 | 5946464.148 |
| White-naped Crane | -6196552.701 | 5942089.69  |
| White-naped Crane | -6173344.813 | 5931316.567 |
| White-naped Crane | -6173003.063 | 5946455.978 |
| White-naped Crane | -6174819.797 | 5944451.425 |
| White-naped Crane | -6192322.56  | 5988879.928 |
| White-naped Crane | -6177138.582 | 5934009.809 |
| White-naped Crane | -6197265.146 | 5942037.432 |



|                   |              |             |
|-------------------|--------------|-------------|
| White-naped Crane | -6178058.081 | 5932747.094 |
| White-naped Crane | -6173367.077 | 5931334.509 |
| White-naped Crane | -6171863.151 | 5944255.406 |
| White-naped Crane | -6174815.344 | 5944461.226 |
| White-naped Crane | -6177031.715 | 5933983.705 |
| White-naped Crane | -6177977.931 | 5933088.042 |
| White-naped Crane | -6192253.542 | 5988139.427 |
| White-naped Crane | -6197372.012 | 5941848     |
| White-naped Crane | -6173369.304 | 5931314.936 |
| White-naped Crane | -6174889.928 | 5944513.499 |
| White-naped Crane | -6197490.011 | 5941772.881 |
| White-naped Crane | -6192262.448 | 5988183.757 |
| White-naped Crane | -6171510.268 | 5937244.117 |
| White-naped Crane | -6171692.832 | 5943809.479 |
| White-naped Crane | -6174146.314 | 5931385.071 |
| White-naped Crane | -6174866.551 | 5944485.729 |
| White-naped Crane | -6171621.588 | 5937299.61  |
| White-naped Crane | -6177272.165 | 5933985.336 |
| White-naped Crane | -6197349.748 | 5941813.706 |
| White-naped Crane | -6172745.915 | 5945124.459 |
| White-naped Crane | -6192244.637 | 5988157.488 |
| White-naped Crane | -6175842.823 | 5931314.936 |
| White-naped Crane | -6174850.966 | 5944482.462 |
| White-naped Crane | -6177450.276 | 5933799.344 |
| White-naped Crane | -6197572.387 | 5941560.593 |
| White-naped Crane | -6192162.26  | 5988764.991 |
| White-naped Crane | -6172620.124 | 5945171.834 |
| White-naped Crane | -6175321.848 | 5934194.175 |
| White-naped Crane | -6175849.502 | 5931252.958 |
| White-naped Crane | -6178265.135 | 5933342.538 |
| White-naped Crane | -6192166.713 | 5988771.558 |
| White-naped Crane | -6197592.425 | 5941565.492 |
| White-naped Crane | -6175326.3   | 5934192.543 |
| White-naped Crane | -6172634.595 | 5945181.636 |
| White-naped Crane | -6174845.4   | 5944469.394 |
| White-naped Crane | -6175849.502 | 5931266.006 |
| White-naped Crane | -6174856.532 | 5944474.294 |
| White-naped Crane | -6175332.979 | 5934202.333 |
| White-naped Crane | -6178265.135 | 5933347.432 |
| White-naped Crane | -6192166.713 | 5988769.916 |
| White-naped Crane | -6197594.651 | 5941570.391 |
| White-naped Crane | -6172666.878 | 5945152.231 |
| White-naped Crane | -6175840.596 | 5931288.84  |
| White-naped Crane | -6172680.236 | 5945142.429 |
| White-naped Crane | -6175332.979 | 5934190.912 |
| White-naped Crane | -6178267.361 | 5933342.538 |
| White-naped Crane | -6174955.606 | 5944515.132 |
| White-naped Crane | -6192164.486 | 5988766.633 |
| White-naped Crane | -6197576.84  | 5941576.923 |
| White-naped Crane | -6175809.427 | 5931248.065 |
| White-naped Crane | -6178265.135 | 5933342.538 |
| White-naped Crane | -6175324.074 | 5934190.912 |
| White-naped Crane | -6197561.255 | 5941572.024 |
| White-naped Crane | -6192204.562 | 5988764.991 |
| White-naped Crane | -6172667.991 | 5945144.062 |
| White-naped Crane | -6175802.748 | 5931230.123 |
| White-naped Crane | -6174947.814 | 5944526.567 |
| White-naped Crane | -6172672.444 | 5945135.894 |

|                   |              |             |
|-------------------|--------------|-------------|
| White-naped Crane | -6174935.569 | 5944524.933 |
| White-naped Crane | -6175319.621 | 5934200.701 |
| White-naped Crane | -6178302.984 | 5933198.975 |
| White-naped Crane | -6192206.788 | 5988774.842 |
| White-naped Crane | -6175789.389 | 5931246.434 |
| White-naped Crane | -6197532.312 | 5941496.908 |
| White-naped Crane | -6172669.104 | 5945142.429 |
| White-naped Crane | -6174935.569 | 5944533.101 |
| White-naped Crane | -6192204.562 | 5988768.274 |
| White-naped Crane | -6178302.984 | 5933205.501 |
| White-naped Crane | -6197532.312 | 5941488.743 |
| White-naped Crane | -6175321.848 | 5934199.069 |
| White-naped Crane | -6175811.653 | 5931243.172 |
| White-naped Crane | -6178302.984 | 5933205.501 |
| White-naped Crane | -6174942.248 | 5944518.399 |
| White-naped Crane | -6175317.395 | 5934197.438 |
| White-naped Crane | -6192202.335 | 5988763.349 |
| White-naped Crane | -6197541.218 | 5941501.807 |
| White-naped Crane | -6172666.878 | 5945144.062 |
| White-naped Crane | -6175818.332 | 5931249.696 |
| White-naped Crane | -6178302.984 | 5933202.238 |
| White-naped Crane | -6174915.531 | 5944498.797 |
| White-naped Crane | -6192204.562 | 5988769.916 |
| White-naped Crane | -6175312.942 | 5934190.912 |
| White-naped Crane | -6197543.444 | 5941480.578 |
| White-naped Crane | -6172665.764 | 5945137.528 |
| White-naped Crane | -6175858.407 | 5931243.172 |
| White-naped Crane | -6174878.796 | 5944484.095 |
| White-naped Crane | -6192204.562 | 5988764.991 |
| White-naped Crane | -6170797.823 | 5936273.044 |
| White-naped Crane | -6201023.292 | 5937888.839 |
| White-naped Crane | -6173525.151 | 5931952.69  |
| White-naped Crane | -6169945.116 | 5939831.457 |
| White-naped Crane | -6172675.783 | 5945106.489 |
| White-naped Crane | -6172672.444 | 5945085.251 |
| White-naped Crane | -6174840.947 | 5944451.425 |
| White-naped Crane | -6192204.562 | 5988766.633 |
| White-naped Crane | -6170791.144 | 5936255.093 |
| White-naped Crane | -6201007.707 | 5937859.458 |
| White-naped Crane | -6171926.603 | 5936770.807 |
| White-naped Crane | -6173493.982 | 5931944.535 |
| White-naped Crane | -6192082.11  | 5988264.208 |
| White-naped Crane | -6170938.086 | 5936328.531 |
| White-naped Crane | -6203944.315 | 5934110.965 |
| White-naped Crane | -6172761.499 | 5945068.915 |
| White-naped Crane | -6173969.316 | 5948555.787 |
| White-naped Crane | -6192077.657 | 5988262.566 |
| White-naped Crane | -6178768.299 | 5932861.286 |
| White-naped Crane | -6175591.241 | 5932561.129 |
| White-naped Crane | -6172762.612 | 5945060.747 |
| White-naped Crane | -6204253.783 | 5933572.569 |
| White-naped Crane | -6191155.932 | 5988871.719 |
| White-naped Crane | -6174189.728 | 5950337.349 |
| White-naped Crane | -6178770.525 | 5932861.286 |
| White-naped Crane | -6173137.759 | 5931846.667 |
| White-naped Crane | -6178766.073 | 5933079.885 |
| White-naped Crane | -6174233.143 | 5950728.034 |
| White-naped Crane | -6227546.273 | 5904905.069 |

|                   |              |             |
|-------------------|--------------|-------------|
| White-naped Crane | -6187146.204 | 5914447.074 |
| White-naped Crane | -6172752.594 | 5945060.747 |
| White-naped Crane | -6191135.894 | 5988810.966 |
| White-naped Crane | -6191131.442 | 5988804.398 |
| White-naped Crane | -6178144.91  | 5932368.642 |
| White-naped Crane | -6174205.313 | 5950597.259 |
| White-naped Crane | -6227782.271 | 5904784.742 |
| White-naped Crane | -6172708.066 | 5945454.46  |
| White-naped Crane | -6185750.257 | 5912331.143 |
| White-naped Crane | -6172709.179 | 5945441.391 |
| White-naped Crane | -6174321.085 | 5950886.602 |
| White-naped Crane | -6191133.668 | 5988814.249 |
| White-naped Crane | -6178053.628 | 5932539.923 |
| White-naped Crane | -6227875.779 | 5904757.1   |
| White-naped Crane | -6185745.805 | 5912313.241 |
| White-naped Crane | -6172715.858 | 5945408.717 |
| White-naped Crane | -6175193.83  | 5951430.986 |
| White-naped Crane | -6178164.947 | 5932075.027 |
| White-naped Crane | -6185756.937 | 5912277.437 |
| White-naped Crane | -6191124.762 | 5988852.015 |
| White-naped Crane | -6178452.152 | 5932244.67  |
| White-naped Crane | -6172712.519 | 5945398.915 |
| White-naped Crane | -6185759.163 | 5912269.3   |
| White-naped Crane | -6191138.121 | 5988825.743 |
| White-naped Crane | -6175249.49  | 5951622.264 |
| White-naped Crane | -6226544.398 | 5900346.847 |
| White-naped Crane | -6191138.121 | 5988825.743 |
| White-naped Crane | -6178336.379 | 5932443.679 |
| White-naped Crane | -6185748.031 | 5912303.476 |
| White-naped Crane | -6172689.142 | 5945400.548 |
| White-naped Crane | -6175155.982 | 5951761.229 |
| White-naped Crane | -6226564.436 | 5900374.475 |
| White-naped Crane | -6175093.643 | 5951821.721 |
| White-naped Crane | -6191135.894 | 5988825.743 |
| White-naped Crane | -6171673.908 | 5943914.016 |
| White-naped Crane | -6185754.71  | 5912301.849 |
| White-naped Crane | -6178365.322 | 5932942.852 |
| White-naped Crane | -6226504.323 | 5900265.588 |
| White-naped Crane | -6178140.457 | 5933138.614 |
| White-naped Crane | -6192104.374 | 5989242.814 |
| White-naped Crane | -6186580.701 | 5912744.522 |
| White-naped Crane | -6171648.304 | 5943900.949 |
| White-naped Crane | -6175128.152 | 5951800.467 |
| White-naped Crane | -6226428.626 | 5900168.079 |
| White-naped Crane | -6226344.023 | 5897629.964 |
| White-naped Crane | -6175101.435 | 5951821.721 |
| White-naped Crane | -6192099.921 | 5989257.592 |
| White-naped Crane | -6191247.214 | 5911722.501 |
| White-naped Crane | -6177904.46  | 5933277.282 |
| White-naped Crane | -6171604.89  | 5943842.146 |
| White-naped Crane | -6175291.791 | 5951723.627 |
| White-naped Crane | -6172841.649 | 5945070.549 |
| White-naped Crane | -6178160.495 | 5933435.529 |
| White-naped Crane | -6192086.563 | 5988989.942 |
| White-naped Crane | -6192039.809 | 5912228.615 |
| White-naped Crane | -6172678.01  | 5945268.22  |
| White-naped Crane | -6192171.166 | 5989141.007 |
| White-naped Crane | -6178151.589 | 5933422.477 |

|                   |              |             |
|-------------------|--------------|-------------|
| White-naped Crane | -6226266.099 | 5897569.851 |
| White-naped Crane | -6192019.771 | 5912215.595 |
| White-naped Crane | -6175271.754 | 5951754.69  |
| White-naped Crane | -6175272.867 | 5951753.055 |
| White-naped Crane | -6172683.576 | 5945295.993 |
| White-naped Crane | -6192024.224 | 5912225.36  |
| White-naped Crane | -6192171.166 | 5989141.007 |
| White-naped Crane | -6226270.552 | 5897581.223 |
| White-naped Crane | -6178527.849 | 5932983.636 |
| White-naped Crane | -6175262.848 | 5951736.706 |
| White-naped Crane | -6191999.734 | 5912217.223 |
| White-naped Crane | -6192171.166 | 5989136.081 |
| White-naped Crane | -6172685.802 | 5945269.854 |
| White-naped Crane | -6178534.528 | 5932985.267 |
| White-naped Crane | -6226275.005 | 5897569.851 |
| White-naped Crane | -6175245.037 | 5951731.801 |
| White-naped Crane | -6178538.981 | 5932980.373 |
| White-naped Crane | -6192006.413 | 5912210.713 |
| White-naped Crane | -6172678.01  | 5945268.22  |
| White-naped Crane | -6192173.392 | 5989142.649 |
| White-naped Crane | -6226188.176 | 5897514.612 |
| White-naped Crane | -6172676.896 | 5945268.22  |
| White-naped Crane | -6175269.527 | 5951748.15  |
| White-naped Crane | -6192166.713 | 5989137.723 |
| White-naped Crane | -6178552.339 | 5933004.843 |
| White-naped Crane | -6192006.413 | 5912217.223 |
| White-naped Crane | -6192166.713 | 5989142.649 |
| White-naped Crane | -6178538.981 | 5933001.58  |
| White-naped Crane | -6175265.075 | 5951753.055 |
| White-naped Crane | -6172674.67  | 5945268.22  |
| White-naped Crane | -6191997.507 | 5912222.105 |
| White-naped Crane | -6226177.044 | 5897522.736 |
| White-naped Crane | -6172679.123 | 5945264.953 |
| White-naped Crane | -6175247.263 | 5951746.515 |
| White-naped Crane | -6178541.207 | 5933006.474 |
| White-naped Crane | -6226179.27  | 5897521.111 |
| White-naped Crane | -6192171.166 | 5989132.797 |
| White-naped Crane | -6191999.734 | 5912215.595 |
| White-naped Crane | -6172690.255 | 5945256.784 |
| White-naped Crane | -6178541.207 | 5933003.212 |
| White-naped Crane | -6192171.166 | 5989139.365 |
| White-naped Crane | -6226230.477 | 5897460.999 |
| White-naped Crane | -6175262.848 | 5951749.785 |
| White-naped Crane | -6192004.186 | 5912215.595 |
| White-naped Crane | -6175302.923 | 5951743.245 |
| White-naped Crane | -6178543.434 | 5932991.792 |
| White-naped Crane | -6226230.477 | 5897467.498 |
| White-naped Crane | -6192004.186 | 5912207.458 |
| White-naped Crane | -6192171.166 | 5989131.155 |
| White-naped Crane | -6175053.568 | 5951834.8   |
| White-naped Crane | -6170860.162 | 5936457.458 |
| White-naped Crane | -6192197.882 | 5989070.4   |
| White-naped Crane | -6226292.816 | 5897407.386 |
| White-naped Crane | -6172739.235 | 5945278.022 |
| White-naped Crane | -6172279.486 | 5945047.678 |
| White-naped Crane | -6174905.513 | 5952029.357 |
| White-naped Crane | -6192200.109 | 5989078.61  |
| White-naped Crane | -6191233.856 | 5911296.152 |

|                   |              |             |
|-------------------|--------------|-------------|
| White-naped Crane | -6170797.823 | 5936243.669 |
| White-naped Crane | -6226315.08  | 5897493.492 |
| White-naped Crane | -6174897.72  | 5951954.15  |
| White-naped Crane | -6192204.562 | 5989081.894 |
| White-naped Crane | -6170835.672 | 5936230.613 |
| White-naped Crane | -6226246.062 | 5897519.486 |
| White-naped Crane | -6173160.023 | 5946109.6   |
| White-naped Crane | -6190554.807 | 5910064.415 |
| White-naped Crane | -6178238.418 | 5933239.76  |
| White-naped Crane | -6189639.76  | 5910825.891 |
| White-naped Crane | -6192202.335 | 5989083.536 |
| White-naped Crane | -6173400.473 | 5947451.077 |
| White-naped Crane | -6175137.057 | 5951726.896 |
| White-naped Crane | -6223696.845 | 5895859.249 |
| White-naped Crane | -6173423.85  | 5947485.392 |
| White-naped Crane | -6192206.788 | 5989080.252 |
| White-naped Crane | -6226330.665 | 5897576.349 |
| White-naped Crane | -6178092.59  | 5956665.693 |
| White-naped Crane | -6189840.136 | 5911636.254 |
| White-naped Crane | -6172994.157 | 5946506.629 |
| White-naped Crane | -6175056.907 | 5953133.02  |
| White-naped Crane | -6178383.134 | 5932544.816 |
| White-naped Crane | -6192206.788 | 5989070.4   |
| White-naped Crane | -6226321.759 | 5897566.601 |
| White-naped Crane | -6189802.287 | 5911761.557 |
| White-naped Crane | -6174580.46  | 5952053.881 |
| White-naped Crane | -6178750.488 | 5932947.746 |
| White-naped Crane | -6191723.661 | 5989050.696 |
| White-naped Crane | -6189987.077 | 5911509.324 |
| White-naped Crane | -6172946.29  | 5946521.334 |
| White-naped Crane | -6226292.816 | 5897506.489 |
| White-naped Crane | -6174453.556 | 5951820.086 |
| White-naped Crane | -6192213.467 | 5989127.871 |
| White-naped Crane | -6226283.91  | 5897504.864 |
| White-naped Crane | -6178904.109 | 5932765.039 |
| White-naped Crane | -6172946.29  | 5946519.7   |
| White-naped Crane | -6195112.227 | 5913900.138 |
| White-naped Crane | -6179010.975 | 5932689.999 |
| White-naped Crane | -6174259.86  | 5951735.071 |
| White-naped Crane | -6195003.134 | 5913882.233 |
| White-naped Crane | -6192217.92  | 5989131.155 |
| White-naped Crane | -6172940.724 | 5946531.138 |
| White-naped Crane | -6226275.005 | 5897509.738 |
| White-naped Crane | -6173065.401 | 5950981.417 |
| White-naped Crane | -6192211.241 | 5989144.291 |
| White-naped Crane | -6179042.145 | 5932732.413 |
| White-naped Crane | -6172931.818 | 5946524.602 |
| White-naped Crane | -6194994.228 | 5913878.977 |
| White-naped Crane | -6226275.005 | 5897495.117 |
| White-naped Crane | -6172745.915 | 5945776.306 |
| White-naped Crane | -6173113.269 | 5951027.19  |
| White-naped Crane | -6178930.825 | 5932528.504 |
| White-naped Crane | -6226277.231 | 5897491.867 |
| White-naped Crane | -6192211.241 | 5989147.575 |
| White-naped Crane | -6173699.923 | 5951283.852 |
| White-naped Crane | -6178759.393 | 5932628.011 |
| White-naped Crane | -6172743.688 | 5945691.35  |
| White-naped Crane | -6192211.241 | 5989142.649 |

|                   |              |             |
|-------------------|--------------|-------------|
| White-naped Crane | -6196165.309 | 5914282.664 |
| White-naped Crane | -6226479.833 | 5899041.922 |
| White-naped Crane | -6172737.009 | 5945692.984 |
| White-naped Crane | -6178710.413 | 5932796.033 |
| White-naped Crane | -6192213.467 | 5989129.513 |
| White-naped Crane | -6225270.903 | 5899007.798 |
| White-naped Crane | -6174107.352 | 5951712.182 |
| White-naped Crane | -6191162.611 | 5989047.412 |
| White-naped Crane | -6178717.092 | 5932982.004 |
| White-naped Crane | -6190926.614 | 5912200.948 |
| White-naped Crane | -6225224.149 | 5899009.423 |
| White-naped Crane | -6172612.331 | 5944889.218 |
| White-naped Crane | -6175002.361 | 5951831.53  |
| White-naped Crane | -6172133.657 | 5943579.174 |
| White-naped Crane | -6178576.829 | 5933353.958 |
| White-naped Crane | -6189793.381 | 5911561.398 |
| White-naped Crane | -6225299.846 | 5899030.547 |
| White-naped Crane | -6191171.517 | 5989037.56  |
| White-naped Crane | -6175046.888 | 5951864.228 |
| White-naped Crane | -6174275.444 | 5945243.715 |
| White-naped Crane | -6189786.702 | 5911545.125 |
| White-naped Crane | -6191171.517 | 5989029.35  |
| White-naped Crane | -6178547.886 | 5933006.474 |
| White-naped Crane | -6225275.356 | 5899002.923 |
| White-naped Crane | -6175012.379 | 5951828.26  |
| White-naped Crane | -6191173.743 | 5989022.782 |
| White-naped Crane | -6189784.476 | 5911525.597 |
| White-naped Crane | -6225282.035 | 5899006.173 |
| White-naped Crane | -6178550.113 | 5933004.843 |
| White-naped Crane | -6174267.652 | 5945230.646 |
| White-naped Crane | -6174276.558 | 5945232.28  |
| White-naped Crane | -6175041.322 | 5951802.102 |
| White-naped Crane | -6178554.566 | 5933008.106 |
| White-naped Crane | -6189786.702 | 5911532.106 |
| White-naped Crane | -6191175.969 | 5989029.35  |
| White-naped Crane | -6225282.035 | 5899001.298 |
| White-naped Crane | -6175012.379 | 5951759.594 |
| White-naped Crane | -6178550.113 | 5933001.58  |
| White-naped Crane | -6191171.517 | 5989027.708 |
| White-naped Crane | -6189784.476 | 5911530.479 |
| White-naped Crane | -6174273.218 | 5945233.913 |
| White-naped Crane | -6175054.681 | 5951818.451 |
| White-naped Crane | -6189786.702 | 5911527.224 |
| White-naped Crane | -6191193.781 | 5989012.93  |
| White-naped Crane | -6178547.886 | 5933003.212 |
| White-naped Crane | -6174270.992 | 5945230.646 |
| White-naped Crane | -6225288.714 | 5898960.675 |
| White-naped Crane | -6174267.652 | 5945235.547 |
| White-naped Crane | -6175034.643 | 5951811.911 |
| White-naped Crane | -6178550.113 | 5932999.949 |
| White-naped Crane | -6189780.023 | 5911538.615 |
| White-naped Crane | -6191191.554 | 5989003.078 |
| White-naped Crane | -6225279.809 | 5898972.049 |
| White-naped Crane | -6174474.706 | 5944913.722 |
| White-naped Crane | -6175033.53  | 5951813.546 |
| White-naped Crane | -6189784.476 | 5911530.479 |
| White-naped Crane | -6178538.981 | 5933003.212 |
| White-naped Crane | -6191191.554 | 5989016.214 |

|                   |              |             |
|-------------------|--------------|-------------|
| White-naped Crane | -6225288.714 | 5898955.8   |
| White-naped Crane | -6175015.719 | 5951798.832 |
| White-naped Crane | -6178538.981 | 5933001.58  |
| White-naped Crane | -6191196.007 | 5989014.572 |
| White-naped Crane | -6225288.714 | 5898954.175 |
| White-naped Crane | -6189786.702 | 5911532.106 |
| White-naped Crane | -6174494.744 | 5944882.683 |
| White-naped Crane | -6174510.328 | 5944867.981 |
| White-naped Crane | -6175029.077 | 5951802.102 |
| White-naped Crane | -6191196.007 | 5989016.214 |
| White-naped Crane | -6189782.249 | 5911548.379 |
| White-naped Crane | -6178536.754 | 5932998.318 |
| White-naped Crane | -6225284.261 | 5898985.049 |
| White-naped Crane | -6191966.338 | 5988707.522 |
| White-naped Crane | -6178599.093 | 5933420.846 |
| White-naped Crane | -6174657.27  | 5951857.689 |
| White-naped Crane | -6186941.376 | 5912645.244 |
| White-naped Crane | -6171590.418 | 5943802.945 |
| White-naped Crane | -6171580.399 | 5943856.847 |
| White-naped Crane | -6182435.163 | 5915168.237 |
| White-naped Crane | -6191964.111 | 5988702.596 |
| White-naped Crane | -6174394.556 | 5951574.853 |
| White-naped Crane | -6170777.786 | 5936255.093 |
| White-naped Crane | -6225179.621 | 5898611.323 |
| White-naped Crane | -6173196.758 | 5944204.768 |
| White-naped Crane | -6170864.615 | 5936253.461 |
| White-naped Crane | -6191966.338 | 5988712.448 |
| White-naped Crane | -6174155.219 | 5951551.964 |
| White-naped Crane | -6225368.864 | 5898362.723 |
| White-naped Crane | -6170826.767 | 5936251.829 |
| White-naped Crane | -6191966.338 | 5988712.448 |
| White-naped Crane | -6174176.37  | 5951529.076 |
| White-naped Crane | -6225482.41  | 5898073.511 |
| White-naped Crane | -6170751.069 | 5936276.308 |
| White-naped Crane | -6174095.107 | 5945343.369 |
| White-naped Crane | -6191532.192 | 5988671.399 |
| White-naped Crane | -6174304.387 | 5951769.404 |
| White-naped Crane | -6178227.286 | 5933287.07  |
| White-naped Crane | -6173569.679 | 5935599.07  |
| White-naped Crane | -6174112.918 | 5945292.725 |
| White-naped Crane | -6226308.401 | 5897545.481 |
| White-naped Crane | -6174523.687 | 5951887.117 |
| White-naped Crane | -6178149.363 | 5933187.555 |
| White-naped Crane | -6226283.91  | 5897506.489 |
| White-naped Crane | -6173741.111 | 5934182.754 |
| White-naped Crane | -6191961.885 | 5988699.313 |
| White-naped Crane | -6174127.389 | 5945269.854 |
| White-naped Crane | -6174419.046 | 5951854.419 |
| White-naped Crane | -6179331.576 | 5932081.552 |
| White-naped Crane | -6177281.071 | 5934047.335 |
| White-naped Crane | -6174126.276 | 5945271.487 |
| White-naped Crane | -6226277.231 | 5897548.73  |
| White-naped Crane | -6191966.338 | 5988702.596 |
| White-naped Crane | -6174433.518 | 5951787.388 |
| White-naped Crane | -6191961.885 | 5988700.954 |
| White-naped Crane | -6178944.184 | 5932171.267 |
| White-naped Crane | -6226283.91  | 5897486.993 |
| White-naped Crane | -6177240.996 | 5934037.546 |

|                   |              |             |
|-------------------|--------------|-------------|
| White-naped Crane | -6191293.968 | 5989323.275 |
| White-naped Crane | -6178881.845 | 5932375.167 |
| White-naped Crane | -6174386.764 | 5951792.292 |
| White-naped Crane | -6226292.816 | 5897415.509 |
| White-naped Crane | -6177214.279 | 5934029.388 |
| White-naped Crane | -6174126.276 | 5945281.289 |
| White-naped Crane | -6174393.443 | 5951803.737 |
| White-naped Crane | -6191302.874 | 5989313.422 |
| White-naped Crane | -6226270.552 | 5897547.106 |
| White-naped Crane | -6178289.625 | 5932830.291 |
| White-naped Crane | -6174126.276 | 5945276.388 |
| White-naped Crane | -6177033.941 | 5933983.705 |
| White-naped Crane | -6174130.729 | 5945278.022 |
| White-naped Crane | -6178089.25  | 5933114.144 |
| White-naped Crane | -6174384.537 | 5951787.388 |
| White-naped Crane | -6177227.637 | 5934110.965 |
| White-naped Crane | -6191912.904 | 5989316.706 |
| White-naped Crane | -6226319.533 | 5897521.111 |
| White-naped Crane | -6174380.085 | 5951784.118 |
| White-naped Crane | -6178149.363 | 5933429.003 |
| White-naped Crane | -6191890.641 | 5989257.592 |
| White-naped Crane | -6226317.306 | 5897517.862 |
| White-naped Crane | -6172000.074 | 5943530.173 |
| White-naped Crane | -6174391.217 | 5935767.151 |
| White-naped Crane | -6172073.545 | 5943569.373 |
| White-naped Crane | -6173375.983 | 5951775.943 |
| White-naped Crane | -6178156.042 | 5933432.266 |
| White-naped Crane | -6191890.641 | 5989242.814 |
| White-naped Crane | -6226272.778 | 5897522.736 |
| White-naped Crane | -6171516.947 | 5938117.359 |
| White-naped Crane | -6178133.778 | 5933872.762 |
| White-naped Crane | -6225393.355 | 5898188.87  |
| White-naped Crane | -6171619.361 | 5937508.529 |
| White-naped Crane | -6191890.641 | 5989252.666 |
| White-naped Crane | -6174159.672 | 5935705.14  |
| White-naped Crane | -6191908.452 | 5989242.814 |
| White-naped Crane | -6172830.517 | 5945291.092 |
| White-naped Crane | -6178792.789 | 5932897.175 |
| White-naped Crane | -6224767.739 | 5898404.968 |
| White-naped Crane | -6172924.026 | 5945418.519 |
| White-naped Crane | -6178795.016 | 5932859.655 |
| White-naped Crane | -6175016.832 | 5951800.467 |
| White-naped Crane | -6174567.101 | 5935819.371 |
| White-naped Crane | -6191910.678 | 5989249.382 |
| White-naped Crane | -6225413.392 | 5898320.478 |
| White-naped Crane | -6175010.153 | 5951797.197 |
| White-naped Crane | -6178797.242 | 5932862.917 |
| White-naped Crane | -6174987.889 | 5935928.707 |
| White-naped Crane | -6191915.131 | 5989251.024 |
| White-naped Crane | -6172921.799 | 5945451.193 |
| White-naped Crane | -6225420.071 | 5898322.103 |
| White-naped Crane | -6175025.738 | 5951834.8   |
| White-naped Crane | -6191912.904 | 5989252.666 |
| White-naped Crane | -6175001.247 | 5935925.443 |
| White-naped Crane | -6225415.618 | 5898326.977 |
| White-naped Crane | -6175021.285 | 5951826.625 |
| White-naped Crane | -6175001.247 | 5935931.971 |
| White-naped Crane | -6191906.225 | 5989255.95  |



|                   |              |             |
|-------------------|--------------|-------------|
| White-naped Crane | -6178795.016 | 5932895.544 |
| White-naped Crane | -6172919.573 | 5945444.658 |
| White-naped Crane | -6225420.071 | 5898323.728 |
| White-naped Crane | -6172957.422 | 5945472.431 |
| White-naped Crane | -6175019.059 | 5951824.99  |
| White-naped Crane | -6174999.021 | 5935925.443 |
| White-naped Crane | -6191912.904 | 5989269.087 |
| White-naped Crane | -6225413.392 | 5898323.728 |
| White-naped Crane | -6178795.016 | 5932897.175 |
| White-naped Crane | -6175001.247 | 5935927.075 |
| White-naped Crane | -6191910.678 | 5989278.939 |
| White-naped Crane | -6178795.016 | 5932900.438 |
| White-naped Crane | -6225413.392 | 5898320.478 |
| White-naped Crane | -6175023.511 | 5951833.165 |
| White-naped Crane | -6175021.285 | 5951824.99  |
| White-naped Crane | -6191912.904 | 5989275.655 |
| White-naped Crane | -6178792.789 | 5932898.806 |
| White-naped Crane | -6225411.166 | 5898323.728 |
| White-naped Crane | -6174999.021 | 5935923.811 |
| White-naped Crane | -6172895.083 | 5945457.728 |
| White-naped Crane | -6191912.904 | 5989272.371 |
| White-naped Crane | -6175016.832 | 5951824.99  |
| White-naped Crane | -6178797.242 | 5932897.175 |
| White-naped Crane | -6225397.807 | 5898335.101 |
| White-naped Crane | -6175005.7   | 5935930.339 |
| White-naped Crane | -6175014.606 | 5951846.244 |
| White-naped Crane | -6191912.904 | 5989275.655 |
| White-naped Crane | -6178792.789 | 5932897.175 |
| White-naped Crane | -6225397.807 | 5898339.976 |
| White-naped Crane | -6175070.265 | 5935896.069 |
| White-naped Crane | -6172921.799 | 5945436.49  |
| White-naped Crane | -6178592.414 | 5933308.278 |
| White-naped Crane | -6191912.904 | 5989274.013 |
| White-naped Crane | -6225357.732 | 5898252.237 |
| White-naped Crane | -6171568.154 | 5937461.195 |
| White-naped Crane | -6171884.302 | 5943843.78  |
| White-naped Crane | -6171864.264 | 5943833.979 |
| White-naped Crane | -6172467.616 | 5951385.21  |
| White-naped Crane | -6178196.117 | 5933412.689 |
| White-naped Crane | -6192097.695 | 5988960.386 |
| White-naped Crane | -6225179.621 | 5898614.573 |
| White-naped Crane | -6171508.042 | 5937438.344 |
| White-naped Crane | -6172340.712 | 5943958.118 |
| White-naped Crane | -6169624.516 | 5950371.676 |
| White-naped Crane | -6170860.162 | 5936568.435 |
| White-naped Crane | -6226312.853 | 5897509.738 |
| White-naped Crane | -6171300.988 | 5937247.381 |
| White-naped Crane | -6191307.326 | 5989246.098 |
| White-naped Crane | -6169070.145 | 5949642.659 |
| White-naped Crane | -6191999.734 | 5988881.57  |
| White-naped Crane | -6171906.566 | 5943961.385 |
| White-naped Crane | -6173950.391 | 5934634.71  |
| White-naped Crane | -6226261.647 | 5897537.358 |
| White-naped Crane | -6172808.253 | 5945795.911 |
| White-naped Crane | -6169214.86  | 5949982.641 |
| White-naped Crane | -6192006.413 | 5988894.706 |
| White-naped Crane | -6170606.354 | 5937066.215 |
| White-naped Crane | -6178552.339 | 5932815.609 |

|                   |              |             |
|-------------------|--------------|-------------|
| White-naped Crane | -6172712.519 | 5945478.966 |
| White-naped Crane | -6178347.511 | 5932784.614 |
| White-naped Crane | -6192001.96  | 5988891.422 |
| White-naped Crane | -6169283.878 | 5949771.786 |
| White-naped Crane | -6178331.927 | 5932822.134 |
| White-naped Crane | -6174161.898 | 5935021.42  |
| White-naped Crane | -6172721.424 | 5945457.728 |
| White-naped Crane | -6192055.393 | 5988853.657 |
| White-naped Crane | -6226288.363 | 5897469.122 |
| White-naped Crane | -6172576.709 | 5945171.834 |
| White-naped Crane | -6164087.485 | 5953425.719 |
| White-naped Crane | -6177926.724 | 5932763.407 |
| White-naped Crane | -6177060.658 | 5935308.608 |
| White-naped Crane | -6192053.167 | 5988850.373 |
| White-naped Crane | -6226319.533 | 5897435.005 |
| White-naped Crane | -6163018.817 | 5954441.248 |
| White-naped Crane | -6177911.139 | 5932773.195 |
| White-naped Crane | -6192053.167 | 5988856.941 |
| White-naped Crane | -6177227.637 | 5934001.652 |
| White-naped Crane | -6172458.71  | 5944944.76  |
| White-naped Crane | -6226283.91  | 5897456.125 |
| White-naped Crane | -6162929.762 | 5954253.178 |
| White-naped Crane | -6191180.422 | 5989045.77  |
| White-naped Crane | -6173017.534 | 5944309.311 |
| White-naped Crane | -6226317.306 | 5897597.47  |
| White-naped Crane | -6177016.13  | 5933903.76  |
| White-naped Crane | -6174344.462 | 5945104.855 |
| White-naped Crane | -6178247.324 | 5933249.548 |
| White-naped Crane | -6177218.732 | 5933923.339 |
| White-naped Crane | -6191897.32  | 5989310.138 |
| White-naped Crane | -6226335.117 | 5897603.969 |
| White-naped Crane | -6162905.272 | 5954210.658 |
| White-naped Crane | -6174342.236 | 5945090.152 |
| White-naped Crane | -6165632.599 | 5959649.969 |
| White-naped Crane | -6191859.471 | 5989280.581 |
| White-naped Crane | -6177094.054 | 5934050.598 |
| White-naped Crane | -6225270.903 | 5899037.047 |
| White-naped Crane | -6165614.788 | 5959604.15  |
| White-naped Crane | -6191892.867 | 5989257.592 |
| White-naped Crane | -6178574.603 | 5933360.483 |
| White-naped Crane | -6174342.236 | 5945081.984 |
| White-naped Crane | -6225279.809 | 5899020.797 |
| White-naped Crane | -6165739.466 | 5959643.423 |
| White-naped Crane | -6171939.961 | 5943688.609 |
| White-naped Crane | -6191910.678 | 5989267.444 |
| White-naped Crane | -6178599.093 | 5933402.9   |
| White-naped Crane | -6225295.393 | 5899027.297 |
| White-naped Crane | -6171178.536 | 5936684.309 |
| White-naped Crane | -6172670.217 | 5945109.756 |
| White-naped Crane | -6165532.412 | 5959587.786 |
| White-naped Crane | -6225239.734 | 5898575.576 |
| White-naped Crane | -6178610.225 | 5933282.176 |
| White-naped Crane | -6191910.678 | 5989265.802 |
| White-naped Crane | -6170842.351 | 5937395.908 |
| White-naped Crane | -6172672.444 | 5945114.657 |
| White-naped Crane | -6174306.614 | 5936392.178 |
| White-naped Crane | -6165572.487 | 5959555.058 |
| White-naped Crane | -6178574.603 | 5933358.852 |

|                   |              |             |
|-------------------|--------------|-------------|
| White-naped Crane | -6191917.357 | 5989274.013 |
| White-naped Crane | -6225215.243 | 5898638.946 |
| White-naped Crane | -6165561.355 | 5959556.694 |
| White-naped Crane | -6178581.282 | 5933352.326 |
| White-naped Crane | -6225213.017 | 5898651.945 |
| White-naped Crane | -6191919.584 | 5989277.297 |
| White-naped Crane | -6174302.161 | 5936388.914 |
| White-naped Crane | -6165565.807 | 5959540.331 |
| White-naped Crane | -6178583.509 | 5933347.432 |
| White-naped Crane | -6191919.584 | 5989274.013 |
| White-naped Crane | -6225213.017 | 5898629.197 |
| White-naped Crane | -6174306.614 | 5936392.178 |
| White-naped Crane | -6172672.444 | 5945114.657 |
| White-naped Crane | -6178576.829 | 5933350.695 |
| White-naped Crane | -6191919.584 | 5989254.308 |
| White-naped Crane | -6165579.166 | 5959550.149 |
| White-naped Crane | -6174311.067 | 5936382.387 |
| White-naped Crane | -6172685.802 | 5945114.657 |
| White-naped Crane | -6225213.017 | 5898648.695 |
| White-naped Crane | -6165570.26  | 5959555.058 |
| White-naped Crane | -6191915.131 | 5989265.802 |
| White-naped Crane | -6172999.723 | 5945397.281 |
| White-naped Crane | -6225213.017 | 5898648.695 |
| White-naped Crane | -6178645.848 | 5933229.971 |
| White-naped Crane | -6174306.614 | 5936385.65  |
| White-naped Crane | -6178643.621 | 5933234.866 |
| White-naped Crane | -6165565.807 | 5959571.422 |
| White-naped Crane | -6174319.972 | 5936379.123 |
| White-naped Crane | -6191915.131 | 5989282.223 |
| White-naped Crane | -6173004.176 | 5945405.449 |
| White-naped Crane | -6225210.791 | 5898647.07  |
| White-naped Crane | -6173015.308 | 5945408.717 |
| White-naped Crane | -6165576.939 | 5959555.058 |
| White-naped Crane | -6191924.036 | 5989283.865 |
| White-naped Crane | -6225208.564 | 5898648.695 |
| White-naped Crane | -6178650.3   | 5933229.971 |
| White-naped Crane | -6174322.199 | 5936384.019 |
| White-naped Crane | -6173030.892 | 5945387.479 |
| White-naped Crane | -6174322.199 | 5936382.387 |
| White-naped Crane | -6225213.017 | 5898650.32  |
| White-naped Crane | -6178648.074 | 5933231.603 |
| White-naped Crane | -6191919.584 | 5989283.865 |
| White-naped Crane | -6165579.166 | 5959577.967 |
| White-naped Crane | -6191926.263 | 5989308.496 |
| White-naped Crane | -6225217.47  | 5898630.821 |
| White-naped Crane | -6178565.698 | 5933291.964 |
| White-naped Crane | -6173010.855 | 5945420.153 |
| White-naped Crane | -6174326.651 | 5936380.755 |
| White-naped Crane | -6172033.47  | 5944013.655 |
| White-naped Crane | -6192059.846 | 5988924.262 |
| White-naped Crane | -6178178.306 | 5933136.983 |
| White-naped Crane | -6225077.207 | 5899009.423 |
| White-naped Crane | -6171488.004 | 5937492.207 |
| White-naped Crane | -6171835.321 | 5943504.04  |
| White-naped Crane | -6191852.792 | 5989021.14  |
| White-naped Crane | -6226279.458 | 5897569.851 |
| White-naped Crane | -6171510.268 | 5937258.806 |
| White-naped Crane | -6170768.88  | 5936098.426 |

|                   |              |             |
|-------------------|--------------|-------------|
| White-naped Crane | -6170813.408 | 5936292.628 |
| White-naped Crane | -6172627.916 | 5945108.122 |
| White-naped Crane | -6174226.464 | 5935151.959 |
| White-naped Crane | -6192678.783 | 5988986.658 |
| White-naped Crane | -6170800.05  | 5936268.148 |
| White-naped Crane | -6192678.783 | 5988989.942 |
| White-naped Crane | -6175179.359 | 5932583.967 |
| White-naped Crane | -6225368.864 | 5898328.602 |
| White-naped Crane | -6170860.162 | 5936349.747 |
| White-naped Crane | -6192015.318 | 5988797.83  |
| White-naped Crane | -6175139.284 | 5932659.005 |
| White-naped Crane | -6225348.827 | 5898159.624 |
| White-naped Crane | -6182078.941 | 5915555.704 |
| White-naped Crane | -6178414.303 | 5932778.089 |
| White-naped Crane | -6178227.286 | 5949140.883 |
| White-naped Crane | -6225669.427 | 5898006.896 |
| White-naped Crane | -6177989.063 | 5933158.191 |
| White-naped Crane | -6191928.489 | 5989014.572 |
| White-naped Crane | -6173462.812 | 5931691.711 |
| White-naped Crane | -6175014.606 | 5943722.909 |
| White-naped Crane | -6226283.91  | 5897456.125 |
| White-naped Crane | -6174262.086 | 5944972.531 |
| White-naped Crane | -6178066.986 | 5933229.971 |
| White-naped Crane | -6226290.59  | 5897514.612 |
| White-naped Crane | -6173467.265 | 5931660.72  |
| White-naped Crane | -6191952.979 | 5989024.424 |
| White-naped Crane | -6191959.659 | 5989024.424 |
| White-naped Crane | -6178222.833 | 5933073.36  |
| White-naped Crane | -6173502.887 | 5931631.361 |
| White-naped Crane | -6174242.048 | 5945973.993 |
| White-naped Crane | -6226272.778 | 5897558.478 |
| White-naped Crane | -6168566.981 | 5938473.211 |
| White-naped Crane | -6178365.322 | 5933283.807 |
| White-naped Crane | -6226275.005 | 5897537.358 |
| White-naped Crane | -6173469.491 | 5931670.507 |
| White-naped Crane | -6191928.489 | 5989053.98  |
| White-naped Crane | -6174375.632 | 5946235.406 |
| White-naped Crane | -6174567.101 | 5946295.858 |
| White-naped Crane | -6191941.848 | 5989037.56  |
| White-naped Crane | -6168589.245 | 5938309.974 |
| White-naped Crane | -6178164.947 | 5933442.054 |
| White-naped Crane | -6173400.473 | 5931680.293 |
| White-naped Crane | -6226335.117 | 5897621.84  |
| White-naped Crane | -6168609.282 | 5938256.107 |
| White-naped Crane | -6178133.778 | 5933460     |
| White-naped Crane | -6225620.446 | 5898430.966 |
| White-naped Crane | -6174569.328 | 5946300.76  |
| White-naped Crane | -6191955.206 | 5989026.066 |
| White-naped Crane | -6168571.434 | 5938492.799 |
| White-naped Crane | -6191979.696 | 5989021.14  |
| White-naped Crane | -6178182.758 | 5933326.224 |
| White-naped Crane | -6180291.15  | 5944789.569 |
| White-naped Crane | -6225290.941 | 5899093.92  |
| White-naped Crane | -6180211     | 5944725.86  |
| White-naped Crane | -6168629.32  | 5938313.239 |
| White-naped Crane | -6178131.551 | 5933460     |
| White-naped Crane | -6191997.507 | 5988968.596 |
| White-naped Crane | -6169377.387 | 5937204.945 |

|                   |              |             |
|-------------------|--------------|-------------|
| White-naped Crane | -6192124.411 | 5988945.608 |
| White-naped Crane | -6176399.42  | 5947815.485 |
| White-naped Crane | -6172472.069 | 5945253.517 |
| White-naped Crane | -6191935.168 | 5988973.522 |
| White-naped Crane | -6178416.529 | 5932854.761 |
| White-naped Crane | -6179135.653 | 5933409.426 |
| White-naped Crane | -6227951.476 | 5904727.832 |
| White-naped Crane | -6172434.22  | 5945211.042 |
| White-naped Crane | -6178418.756 | 5932846.604 |
| White-naped Crane | -6179146.785 | 5933265.862 |
| White-naped Crane | -6176403.873 | 5947815.485 |
| White-naped Crane | -6227276.88  | 5904667.67  |
| White-naped Crane | -6191926.263 | 5988976.806 |
| White-naped Crane | -6172431.994 | 5945217.577 |
| White-naped Crane | -6227279.107 | 5904748.97  |
| White-naped Crane | -6191930.716 | 5988980.09  |
| White-naped Crane | -6176401.647 | 5947810.582 |
| White-naped Crane | -6179149.012 | 5933260.968 |
| White-naped Crane | -6178418.756 | 5932843.341 |
| White-naped Crane | -6191932.942 | 5988981.732 |
| White-naped Crane | -6178423.209 | 5932849.867 |
| White-naped Crane | -6179146.785 | 5933272.388 |
| White-naped Crane | -6227281.333 | 5904752.222 |
| White-naped Crane | -6176412.779 | 5947812.216 |
| White-naped Crane | -6172436.446 | 5945237.181 |
| White-naped Crane | -6179149.012 | 5933262.599 |
| White-naped Crane | -6191928.489 | 5988957.102 |
| White-naped Crane | -6176397.194 | 5947823.655 |
| White-naped Crane | -6227316.955 | 5904657.914 |
| White-naped Crane | -6178416.529 | 5932853.129 |
| White-naped Crane | -6172454.257 | 5945238.814 |
| White-naped Crane | -6176379.383 | 5947823.655 |
| White-naped Crane | -6179146.785 | 5933269.125 |
| White-naped Crane | -6191932.942 | 5988958.744 |
| White-naped Crane | -6172454.257 | 5945235.547 |
| White-naped Crane | -6178416.529 | 5932854.761 |
| White-naped Crane | -6227301.371 | 5904651.41  |
| White-naped Crane | -6176397.194 | 5947849.802 |
| White-naped Crane | -6172476.521 | 5945225.745 |
| White-naped Crane | -6179149.012 | 5933265.862 |
| White-naped Crane | -6191930.716 | 5988957.102 |
| White-naped Crane | -6178416.529 | 5932854.761 |
| White-naped Crane | -6227301.371 | 5904653.036 |
| White-naped Crane | -6172467.616 | 5945232.28  |
| White-naped Crane | -6178418.756 | 5932856.392 |
| White-naped Crane | -6191932.942 | 5988955.46  |
| White-naped Crane | -6179151.238 | 5933259.336 |
| White-naped Crane | -6227303.597 | 5904651.41  |
| White-naped Crane | -6176403.873 | 5947807.314 |
| White-naped Crane | -6176381.609 | 5947792.606 |
| White-naped Crane | -6191937.395 | 5988958.744 |
| White-naped Crane | -6227292.465 | 5904828.645 |
| White-naped Crane | -6178102.608 | 5933716.138 |
| White-naped Crane | -6179177.955 | 5933260.968 |
| White-naped Crane | -6172512.144 | 5945137.528 |
| White-naped Crane | -6171521.4   | 5944392.619 |
| White-naped Crane | -6171799.699 | 5943567.74  |
| White-naped Crane | -6178443.246 | 5932751.988 |

|                   |              |             |
|-------------------|--------------|-------------|
| White-naped Crane | -6170270.169 | 5937084.168 |
| White-naped Crane | -6227270.201 | 5904732.71  |
| White-naped Crane | -6191932.942 | 5988955.46  |
| White-naped Crane | -6178650.3   | 5932830.291 |
| White-naped Crane | -6226744.773 | 5904537.591 |
| White-naped Crane | -6171574.833 | 5944199.868 |
| White-naped Crane | -6192478.407 | 5989559.735 |
| White-naped Crane | -6171826.416 | 5943566.107 |
| White-naped Crane | -6172492.106 | 5945426.687 |
| White-naped Crane | -6172558.898 | 5945426.687 |
| White-naped Crane | -6226444.21  | 5905090.44  |
| White-naped Crane | -6192465.049 | 5989595.862 |
| White-naped Crane | -6179776.854 | 5932463.254 |
| White-naped Crane | -6173053.156 | 5934003.283 |
| White-naped Crane | -6172757.046 | 5946067.121 |
| White-naped Crane | -6172619.01  | 5945456.094 |
| White-naped Crane | -6179741.231 | 5932875.968 |
| White-naped Crane | -6191256.119 | 5989114.735 |
| White-naped Crane | -6174262.086 | 5932711.206 |
| White-naped Crane | -6226303.948 | 5905166.866 |
| White-naped Crane | -6191291.742 | 5989361.042 |
| White-naped Crane | -6174812.004 | 5932394.742 |
| White-naped Crane | -6172828.291 | 5946132.474 |
| White-naped Crane | -6179269.237 | 5933322.961 |
| White-naped Crane | -6178358.643 | 5930631.564 |
| White-naped Crane | -6191590.078 | 5989548.24  |
| White-naped Crane | -6227107.675 | 5904509.949 |
| White-naped Crane | -6173160.023 | 5946158.615 |
| White-naped Crane | -6174201.973 | 5945686.449 |
| White-naped Crane | -6173093.231 | 5946240.307 |
| White-naped Crane | -6178360.87  | 5931197.503 |
| White-naped Crane | -6191545.55  | 5989528.535 |
| White-naped Crane | -6227129.939 | 5904644.906 |
| White-naped Crane | -6173068.741 | 5946233.772 |
| White-naped Crane | -6227118.807 | 5904612.386 |
| White-naped Crane | -6191541.097 | 5989513.756 |
| White-naped Crane | -6173338.134 | 5931588.953 |
| White-naped Crane | -6174315.519 | 5947232.112 |
| White-naped Crane | -6173086.552 | 5946238.673 |
| White-naped Crane | -6178294.078 | 5932481.197 |
| White-naped Crane | -6173476.17  | 5931672.138 |
| White-naped Crane | -6227308.05  | 5904755.474 |
| White-naped Crane | -6191797.132 | 5989280.581 |
| White-naped Crane | -6191790.453 | 5989214.899 |
| White-naped Crane | -6173086.552 | 5946212.532 |
| White-naped Crane | -6173489.529 | 5931701.498 |
| White-naped Crane | -6174302.161 | 5946642.244 |
| White-naped Crane | -6227308.05  | 5904664.418 |
| White-naped Crane | -6191803.811 | 5989191.91  |
| White-naped Crane | -6178612.452 | 5933419.214 |
| White-naped Crane | -6173467.265 | 5931665.614 |
| White-naped Crane | -6173168.929 | 5946282.787 |
| White-naped Crane | -6227185.598 | 5904649.784 |
| White-naped Crane | -6174353.368 | 5946521.334 |
| White-naped Crane | -6172834.97  | 5945310.696 |
| White-naped Crane | -6191846.113 | 5989095.031 |
| White-naped Crane | -6179509.687 | 5933357.22  |
| White-naped Crane | -6173171.155 | 5931367.129 |

|                   |              |             |
|-------------------|--------------|-------------|
| White-naped Crane | -6227156.655 | 5904480.682 |
| White-naped Crane | -6172400.824 | 5944595.175 |
| White-naped Crane | -6173117.722 | 5931345.926 |
| White-naped Crane | -6191725.888 | 5989177.132 |
| White-naped Crane | -6174255.407 | 5946382.453 |
| White-naped Crane | -6227103.222 | 5904568.485 |
| White-naped Crane | -6172661.312 | 5945487.134 |
| White-naped Crane | -6172701.387 | 5945652.141 |
| White-naped Crane | -6168865.317 | 5938620.126 |
| White-naped Crane | -6226326.212 | 5905025.397 |
| White-naped Crane | -6179033.239 | 5933448.58  |
| White-naped Crane | -6192191.203 | 5989134.439 |
| White-naped Crane | -6179661.081 | 5932706.312 |
| White-naped Crane | -6227154.429 | 5904558.729 |
| White-naped Crane | -6172788.216 | 5945969.092 |
| White-naped Crane | -6173068.741 | 5946119.403 |
| White-naped Crane | -6173062.062 | 5946166.784 |
| White-naped Crane | -6191730.34  | 5989098.315 |
| White-naped Crane | -6179698.93  | 5932740.569 |
| White-naped Crane | -6175702.56  | 5939393.922 |
| White-naped Crane | -6227112.127 | 5904535.965 |
| White-naped Crane | -6172696.934 | 5945954.388 |
| White-naped Crane | -6173037.572 | 5946215.799 |
| White-naped Crane | -6175691.428 | 5939375.964 |
| White-naped Crane | -6179696.704 | 5932740.569 |
| White-naped Crane | -6191732.567 | 5989104.883 |
| White-naped Crane | -6227125.486 | 5904516.453 |
| White-naped Crane | -6191730.34  | 5989095.031 |
| White-naped Crane | -6179698.93  | 5932737.307 |
| White-naped Crane | -6175693.655 | 5939371.066 |
| White-naped Crane | -6173050.93  | 5946134.107 |
| White-naped Crane | -6172701.387 | 5945952.754 |
| White-naped Crane | -6172701.387 | 5945957.655 |
| White-naped Crane | -6179696.704 | 5932734.044 |
| White-naped Crane | -6175689.202 | 5939367.801 |
| White-naped Crane | -6191725.888 | 5989099.957 |
| White-naped Crane | -6173066.515 | 5946127.572 |
| White-naped Crane | -6227121.033 | 5904514.827 |
| White-naped Crane | -6173148.891 | 5945983.796 |
| White-naped Crane | -6175689.202 | 5939371.066 |
| White-naped Crane | -6191725.888 | 5989098.315 |
| White-naped Crane | -6179692.251 | 5932732.413 |
| White-naped Crane | -6172681.349 | 5945949.486 |
| White-naped Crane | -6227127.712 | 5904480.682 |
| White-naped Crane | -6172690.255 | 5945957.655 |
| White-naped Crane | -6173133.306 | 5945993.599 |
| White-naped Crane | -6191721.435 | 5989106.525 |
| White-naped Crane | -6175686.975 | 5939374.331 |
| White-naped Crane | -6179696.704 | 5932735.675 |
| White-naped Crane | -6227134.391 | 5904516.453 |
| White-naped Crane | -6191725.888 | 5989090.104 |
| White-naped Crane | -6227132.165 | 5904519.705 |
| White-naped Crane | -6179698.93  | 5932747.094 |
| White-naped Crane | -6173155.57  | 5945996.867 |
| White-naped Crane | -6175689.202 | 5939377.596 |
| White-naped Crane | -6172696.934 | 5945962.557 |
| White-naped Crane | -6172696.934 | 5945964.191 |
| White-naped Crane | -6173160.023 | 5946000.134 |

|                   |              |             |
|-------------------|--------------|-------------|
| White-naped Crane | -6191725.888 | 5989091.746 |
| White-naped Crane | -6179696.704 | 5932742.201 |
| White-naped Crane | -6227134.391 | 5904521.331 |
| White-naped Crane | -6175689.202 | 5939387.392 |
| White-naped Crane | -6173146.665 | 5945991.965 |
| White-naped Crane | -6179656.629 | 5932701.418 |
| White-naped Crane | -6175691.428 | 5939372.699 |
| White-naped Crane | -6191725.888 | 5989090.104 |
| White-naped Crane | -6172696.934 | 5945954.388 |
| White-naped Crane | -6227011.94  | 5904513.201 |
| White-naped Crane | -6171873.17  | 5943722.909 |
| White-naped Crane | -6174705.138 | 5938889.477 |
| White-naped Crane | -6192674.33  | 5989548.24  |
| White-naped Crane | -6227283.559 | 5904682.304 |
| White-naped Crane | -6170860.162 | 5936331.795 |
| White-naped Crane | -6172750.367 | 5945431.588 |
| White-naped Crane | -6170840.125 | 5936315.475 |
| White-naped Crane | -6168989.995 | 5939178.427 |
| White-naped Crane | -6192640.934 | 5989556.451 |
| White-naped Crane | -6226306.174 | 5905004.258 |
| White-naped Crane | -6172305.089 | 5945405.449 |
| White-naped Crane | -6172630.142 | 5945335.201 |
| White-naped Crane | -6172703.613 | 5945475.698 |
| White-naped Crane | -6178603.546 | 5931551.438 |
| White-naped Crane | -6192647.613 | 5989558.093 |
| White-naped Crane | -6169388.519 | 5938429.137 |
| White-naped Crane | -6227087.637 | 5904500.194 |
| White-naped Crane | -6172641.274 | 5945416.885 |
| White-naped Crane | -6191739.246 | 5989131.155 |
| White-naped Crane | -6178601.32  | 5931554.7   |
| White-naped Crane | -6173151.117 | 5931893.969 |
| White-naped Crane | -6172619.01  | 5945194.705 |
| White-naped Crane | -6227285.786 | 5904646.532 |
| White-naped Crane | -6172626.803 | 5945444.658 |
| White-naped Crane | -6179265.897 | 5933052.152 |
| White-naped Crane | -6191737.02  | 5988999.794 |
| White-naped Crane | -6227272.428 | 5904670.922 |
| White-naped Crane | -6172601.199 | 5945104.855 |
| White-naped Crane | -6173102.137 | 5931378.546 |
| White-naped Crane | -6172621.237 | 5945469.164 |
| White-naped Crane | -6227320.295 | 5904677.426 |
| White-naped Crane | -6178913.014 | 5933205.501 |
| White-naped Crane | -6191767.076 | 5988989.942 |
| White-naped Crane | -6172582.275 | 5945096.687 |
| White-naped Crane | -6172608.992 | 5945439.757 |
| White-naped Crane | -6178144.91  | 5933298.49  |
| White-naped Crane | -6173064.288 | 5931266.006 |
| White-naped Crane | -6191689.152 | 5988833.953 |
| White-naped Crane | -6172716.971 | 5945449.559 |
| White-naped Crane | -6178152.702 | 5933419.214 |
| White-naped Crane | -6173262.437 | 5931437.264 |
| White-naped Crane | -6174382.311 | 5946238.673 |
| White-naped Crane | -6191810.491 | 5989180.416 |
| White-naped Crane | -6227158.882 | 5904667.67  |
| White-naped Crane | -6178172.74  | 5933339.275 |
| White-naped Crane | -6191814.943 | 5989182.058 |
| White-naped Crane | -6174378.971 | 5946248.476 |
| White-naped Crane | -6173566.339 | 5931535.127 |



|                   |              |             |
|-------------------|--------------|-------------|
| White-naped Crane | -6172607.878 | 5945269.854 |
| White-naped Crane | -6228471.338 | 5906976.895 |
| White-naped Crane | -6174450.216 | 5946375.918 |
| White-naped Crane | -6172838.31  | 5946112.868 |
| White-naped Crane | -6178257.343 | 5932809.084 |
| White-naped Crane | -6191890.641 | 5989269.087 |
| White-naped Crane | -6228466.886 | 5906918.344 |
| White-naped Crane | -6173107.703 | 5931288.84  |
| White-naped Crane | -6172794.895 | 5946197.827 |
| White-naped Crane | -6178399.831 | 5932815.609 |
| White-naped Crane | -6228502.508 | 5907011.05  |
| White-naped Crane | -6191806.038 | 5989180.416 |
| White-naped Crane | -6174804.212 | 5946284.421 |
| White-naped Crane | -6173098.797 | 5931290.471 |
| White-naped Crane | -6172504.351 | 5945343.369 |
| White-naped Crane | -6178551.226 | 5932843.341 |
| White-naped Crane | -6191818.283 | 5989162.354 |
| White-naped Crane | -6172870.592 | 5930910.452 |
| White-naped Crane | -6228499.168 | 5906991.533 |
| White-naped Crane | -6172998.61  | 5930788.132 |
| White-naped Crane | -6178729.337 | 5932980.373 |
| White-naped Crane | -6172292.844 | 5944565.772 |
| White-naped Crane | -6191830.528 | 5989167.28  |
| White-naped Crane | -6172347.391 | 5944580.474 |
| White-naped Crane | -6172046.828 | 5943424.007 |
| White-naped Crane | -6178933.052 | 5933048.889 |
| White-naped Crane | -6192455.03  | 5989459.567 |
| White-naped Crane | -6172049.055 | 5943433.807 |
| White-naped Crane | -6172994.157 | 5930639.719 |
| White-naped Crane | -6172571.143 | 5945513.274 |
| White-naped Crane | -6178886.298 | 5932960.797 |
| White-naped Crane | -6172861.687 | 5930577.745 |
| White-naped Crane | -6191725.888 | 5989119.661 |
| White-naped Crane | -6172423.088 | 5945585.157 |
| White-naped Crane | -6227289.125 | 5904700.19  |
| White-naped Crane | -6172404.164 | 5945580.256 |
| White-naped Crane | -6172566.69  | 5945652.141 |
| White-naped Crane | -6176769.001 | 5933208.763 |
| White-naped Crane | -6191816.056 | 5988853.657 |
| White-naped Crane | -6227302.484 | 5904661.166 |
| White-naped Crane | -6178789.45  | 5932889.018 |
| White-naped Crane | -6172595.633 | 5945581.89  |
| White-naped Crane | -6227298.031 | 5904661.166 |
| White-naped Crane | -6176775.68  | 5933216.92  |
| White-naped Crane | -6178789.45  | 5932903.7   |
| White-naped Crane | -6191819.396 | 5988855.299 |
| White-naped Crane | -6172611.218 | 5945585.157 |
| White-naped Crane | -6172598.973 | 5945576.989 |
| White-naped Crane | -6176775.68  | 5933210.395 |
| White-naped Crane | -6178786.11  | 5932892.281 |
| White-naped Crane | -6227303.597 | 5904657.914 |
| White-naped Crane | -6172598.973 | 5945576.989 |
| White-naped Crane | -6191822.736 | 5988860.225 |
| White-naped Crane | -6178789.45  | 5932890.65  |
| White-naped Crane | -6176771.227 | 5933218.552 |
| White-naped Crane | -6191822.736 | 5988858.583 |
| White-naped Crane | -6227301.371 | 5904656.288 |
| White-naped Crane | -6172596.746 | 5945588.425 |

|                   |              |             |
|-------------------|--------------|-------------|
| White-naped Crane | -6172605.652 | 5945570.454 |
| White-naped Crane | -6172691.368 | 5945506.739 |
| White-naped Crane | -6178783.884 | 5932887.387 |
| White-naped Crane | -6176767.888 | 5933216.92  |
| White-naped Crane | -6172699.16  | 5945514.907 |
| White-naped Crane | -6191821.622 | 5988858.583 |
| White-naped Crane | -6227300.257 | 5904659.54  |
| White-naped Crane | -6172700.274 | 5945513.274 |
| White-naped Crane | -6191818.283 | 5988858.583 |
| White-naped Crane | -6176767.888 | 5933225.077 |
| White-naped Crane | -6178786.11  | 5932889.018 |
| White-naped Crane | -6172692.481 | 5945514.907 |
| White-naped Crane | -6227291.352 | 5904674.174 |
| White-naped Crane | -6172701.387 | 5945526.343 |
| White-naped Crane | -6172696.934 | 5945511.64  |
| White-naped Crane | -6191816.056 | 5988850.373 |
| White-naped Crane | -6178789.45  | 5932895.544 |
| White-naped Crane | -6176676.606 | 5933011.368 |
| White-naped Crane | -6227302.484 | 5904662.792 |
| White-naped Crane | -6172711.405 | 5945483.867 |
| White-naped Crane | -6176671.04  | 5933001.58  |
| White-naped Crane | -6227306.937 | 5904654.662 |
| White-naped Crane | -6178789.45  | 5932892.281 |
| White-naped Crane | -6191817.17  | 5988855.299 |
| White-naped Crane | -6172699.16  | 5945514.907 |
| White-naped Crane | -6227283.559 | 5904682.304 |
| White-naped Crane | -6176605.361 | 5933065.203 |
| White-naped Crane | -6191818.283 | 5988860.225 |
| White-naped Crane | -6178789.45  | 5932898.806 |
| White-naped Crane | -6172643.501 | 5945454.46  |
| White-naped Crane | -6172643.501 | 5945454.46  |
| White-naped Crane | -6172914.007 | 5946238.673 |
| White-naped Crane | -6193779.732 | 5989502.261 |
| White-naped Crane | -6174494.744 | 5946125.938 |
| White-naped Crane | -6178926.373 | 5933050.521 |
| White-naped Crane | -6170783.352 | 5936428.082 |
| White-naped Crane | -6226468.701 | 5905061.17  |
| White-naped Crane | -6170506.166 | 5945282.923 |
| White-naped Crane | -6170517.298 | 5945302.527 |
| White-naped Crane | -6191727.001 | 5989065.474 |
| White-naped Crane | -6227289.125 | 5904680.678 |
| White-naped Crane | -6170814.521 | 5936429.714 |
| White-naped Crane | -6172254.996 | 5945918.444 |
| White-naped Crane | -6177078.469 | 5933621.513 |
| White-naped Crane | -6174008.278 | 5934592.287 |
| White-naped Crane | -6191747.038 | 5988998.152 |
| White-naped Crane | -6178934.165 | 5933060.309 |
| White-naped Crane | -6174040.56  | 5934435.65  |
| White-naped Crane | -6172534.407 | 5945434.856 |
| White-naped Crane | -6172468.729 | 5945864.529 |
| White-naped Crane | -6228945.559 | 5910484.195 |
| White-naped Crane | -6191742.586 | 5988962.028 |
| White-naped Crane | -6172366.315 | 5945825.319 |
| White-naped Crane | -6174016.07  | 5934324.701 |
| White-naped Crane | -6191728.114 | 5988986.658 |
| White-naped Crane | -6172643.501 | 5945911.909 |
| White-naped Crane | -6178926.373 | 5933052.152 |
| White-naped Crane | -6228415.679 | 5909215.156 |

|                   |              |             |
|-------------------|--------------|-------------|
| White-naped Crane | -6179912.663 | 5932694.893 |
| White-naped Crane | -6172455.371 | 5945805.714 |
| White-naped Crane | -6191712.529 | 5989101.599 |
| White-naped Crane | -6172993.044 | 5947565.463 |
| White-naped Crane | -6228495.829 | 5908779.17  |
| White-naped Crane | -6172961.874 | 5946238.673 |
| White-naped Crane | -6172725.877 | 5946011.571 |
| White-naped Crane | -6175086.963 | 5932670.424 |
| White-naped Crane | -6191741.472 | 5989052.338 |
| White-naped Crane | -6178941.957 | 5932174.529 |
| White-naped Crane | -6228494.716 | 5908777.544 |
| White-naped Crane | -6172932.931 | 5946176.587 |
| White-naped Crane | -6172957.422 | 5946269.717 |
| White-naped Crane | -6191758.17  | 5989081.894 |
| White-naped Crane | -6178944.184 | 5932171.267 |
| White-naped Crane | -6175107.001 | 5932597.017 |
| White-naped Crane | -6228505.847 | 5908949.983 |
| White-naped Crane | -6172993.044 | 5946122.671 |
| White-naped Crane | -6173091.005 | 5946353.044 |
| White-naped Crane | -6178927.486 | 5932166.373 |
| White-naped Crane | -6191578.946 | 5989535.104 |
| White-naped Crane | -6173037.572 | 5930683.753 |
| White-naped Crane | -6228543.696 | 5906915.091 |
| White-naped Crane | -6172950.742 | 5946268.083 |
| White-naped Crane | -6179304.859 | 5931920.068 |
| White-naped Crane | -6173053.156 | 5930628.302 |
| White-naped Crane | -6191574.493 | 5989558.093 |
| White-naped Crane | -6172986.365 | 5946098.163 |
| White-naped Crane | -6228490.263 | 5907006.171 |
| White-naped Crane | -6191545.55  | 5989528.535 |
| White-naped Crane | -6173001.949 | 5930644.611 |
| White-naped Crane | -6179313.764 | 5931920.068 |
| White-naped Crane | -6172930.705 | 5946148.812 |
| White-naped Crane | -6228301.02  | 5906947.62  |
| White-naped Crane | -6172983.025 | 5946094.896 |
| White-naped Crane | -6172978.572 | 5946094.896 |
| White-naped Crane | -6179366.085 | 5931825.462 |
| White-naped Crane | -6173534.057 | 5930864.785 |
| White-naped Crane | -6191723.661 | 5989034.276 |
| White-naped Crane | -6228491.376 | 5906985.027 |
| White-naped Crane | -6172942.95  | 5946081.825 |
| White-naped Crane | -6173039.798 | 5946201.095 |
| White-naped Crane | -6172984.138 | 5946098.163 |
| White-naped Crane | -6179363.858 | 5931822.2   |
| White-naped Crane | -6172978.572 | 5930581.007 |
| White-naped Crane | -6228510.3   | 5907006.171 |
| White-naped Crane | -6191783.774 | 5989003.078 |
| White-naped Crane | -6172987.478 | 5946094.896 |
| White-naped Crane | -6228395.641 | 5906924.85  |
| White-naped Crane | -6192453.917 | 5989461.209 |
| White-naped Crane | -6172998.61  | 5930626.672 |
| White-naped Crane | -6172931.818 | 5946222.335 |
| White-naped Crane | -6179420.631 | 5931911.912 |
| White-naped Crane | -6191712.529 | 5989109.809 |
| White-naped Crane | -6227308.05  | 5904657.914 |
| White-naped Crane | -6173191.192 | 5946259.913 |
| White-naped Crane | -6227273.541 | 5904662.792 |
| White-naped Crane | -6179361.632 | 5931845.035 |

|                   |              |             |
|-------------------|--------------|-------------|
| White-naped Crane | -6174235.369 | 5930028.154 |
| White-naped Crane | -6191724.775 | 5989095.031 |
| White-naped Crane | -6174238.709 | 5930033.047 |
| White-naped Crane | -6179359.405 | 5932083.183 |
| White-naped Crane | -6191730.34  | 5989101.599 |
| White-naped Crane | -6227308.05  | 5904664.418 |
| White-naped Crane | -6179361.632 | 5932075.027 |
| White-naped Crane | -6173224.588 | 5946245.209 |
| White-naped Crane | -6174253.18  | 5929928.677 |
| White-naped Crane | -6173196.758 | 5946256.646 |
| White-naped Crane | -6191727.001 | 5989111.451 |
| White-naped Crane | -6227304.71  | 5904651.41  |
| White-naped Crane | -6173201.211 | 5946245.209 |
| White-naped Crane | -6173235.72  | 5946269.717 |
| White-naped Crane | -6191730.34  | 5989101.599 |
| White-naped Crane | -6174258.746 | 5929892.8   |
| White-naped Crane | -6227316.955 | 5904679.052 |
| White-naped Crane | -6179371.651 | 5932084.814 |
| White-naped Crane | -6173223.475 | 5946269.717 |
| White-naped Crane | -6191730.34  | 5989103.241 |
| White-naped Crane | -6173194.532 | 5946256.646 |
| White-naped Crane | -6174250.954 | 5929907.477 |
| White-naped Crane | -6227277.993 | 5904670.922 |
| White-naped Crane | -6179358.292 | 5932073.396 |
| White-naped Crane | -6179358.292 | 5932083.183 |
| White-naped Crane | -6191730.34  | 5989108.167 |
| White-naped Crane | -6174250.954 | 5929904.216 |
| White-naped Crane | -6173193.419 | 5946259.913 |
| White-naped Crane | -6227282.446 | 5904664.418 |
| White-naped Crane | -6173191.192 | 5946245.209 |
| White-naped Crane | -6173190.079 | 5946256.646 |
| White-naped Crane | -6191732.567 | 5989108.167 |
| White-naped Crane | -6179364.971 | 5932083.183 |
| White-naped Crane | -6227283.559 | 5904674.174 |
| White-naped Crane | -6174258.746 | 5929873.231 |
| White-naped Crane | -6173193.419 | 5946261.547 |
| White-naped Crane | -6191729.227 | 5989103.241 |
| White-naped Crane | -6227281.333 | 5904675.8   |
| White-naped Crane | -6173182.287 | 5946235.406 |
| White-naped Crane | -6174252.067 | 5929904.216 |
| White-naped Crane | -6173193.419 | 5946276.252 |
| White-naped Crane | -6191737.02  | 5989141.007 |
| White-naped Crane | -6179322.67  | 5932076.658 |
| White-naped Crane | -6173207.89  | 5946204.363 |
| White-naped Crane | -6178317.455 | 5932654.111 |
| White-naped Crane | -6191346.288 | 5989305.212 |
| White-naped Crane | -6226954.054 | 5903314.945 |
| White-naped Crane | -6170725.466 | 5936276.308 |
| White-naped Crane | -6170786.691 | 5944286.442 |
| White-naped Crane | -6172645.727 | 5944954.562 |
| White-naped Crane | -6172456.484 | 5945124.459 |
| White-naped Crane | -6170775.56  | 5936266.516 |
| White-naped Crane | -6227090.977 | 5903303.565 |
| White-naped Crane | -6191817.17  | 5989177.132 |
| White-naped Crane | -6170767.767 | 5936266.516 |
| White-naped Crane | -6174072.843 | 5934226.806 |
| White-naped Crane | -6170873.521 | 5936542.322 |
| White-naped Crane | -6172532.181 | 5945229.012 |

|                   |              |             |
|-------------------|--------------|-------------|
| White-naped Crane | -6172336.259 | 5944255.406 |
| White-naped Crane | -6192119.959 | 5988149.278 |
| White-naped Crane | -6172507.691 | 5945501.838 |
| White-naped Crane | -6172452.031 | 5945487.134 |
| White-naped Crane | -6191823.849 | 5988605.722 |
| White-naped Crane | -6178544.547 | 5933006.474 |
| White-naped Crane | -6174321.085 | 5931706.391 |
| White-naped Crane | -6227174.466 | 5903464.515 |
| White-naped Crane | -6178544.547 | 5932996.686 |
| White-naped Crane | -6172529.955 | 5945831.854 |
| White-naped Crane | -6192122.185 | 5988155.846 |
| White-naped Crane | -6227039.77  | 5903370.221 |
| White-naped Crane | -6172970.78  | 5930801.179 |
| White-naped Crane | -6172532.181 | 5945833.488 |
| White-naped Crane | -6178462.17  | 5933074.991 |
| White-naped Crane | -6191847.226 | 5988607.364 |
| White-naped Crane | -6172988.591 | 5930797.917 |
| White-naped Crane | -6229213.839 | 5906693.901 |
| White-naped Crane | -6172545.539 | 5945951.12  |
| White-naped Crane | -6172626.803 | 5945908.642 |
| White-naped Crane | -6178300.757 | 5932928.17  |
| White-naped Crane | -6191771.529 | 5988981.732 |
| White-naped Crane | -6172965.214 | 5930762.037 |
| White-naped Crane | -6229200.481 | 5906689.022 |
| White-naped Crane | -6172706.953 | 5945952.754 |
| White-naped Crane | -6191763.736 | 5988985.016 |
| White-naped Crane | -6178210.588 | 5933078.254 |
| White-naped Crane | -6172640.161 | 5946000.134 |
| White-naped Crane | -6172572.256 | 5945835.121 |
| White-naped Crane | -6191797.132 | 5988985.016 |
| White-naped Crane | -6178221.72  | 5933280.545 |
| White-naped Crane | -6228119.569 | 5907061.47  |
| White-naped Crane | -6172826.065 | 5930737.573 |
| White-naped Crane | -6174331.104 | 5945601.495 |
| White-naped Crane | -6174402.349 | 5945621.1   |
| White-naped Crane | -6191945.187 | 5989098.315 |
| White-naped Crane | -6178406.511 | 5933221.814 |
| White-naped Crane | -6172929.592 | 5946089.994 |
| White-naped Crane | -6172988.591 | 5930773.453 |
| White-naped Crane | -6228100.645 | 5907051.712 |
| White-naped Crane | -6192015.318 | 5988876.644 |
| White-naped Crane | -6172716.971 | 5946253.378 |
| White-naped Crane | -6180463.695 | 5932019.568 |
| White-naped Crane | -6172983.025 | 5930779.977 |
| White-naped Crane | -6227997.117 | 5907129.781 |
| White-naped Crane | -6172683.576 | 5946232.138 |
| White-naped Crane | -6179417.292 | 5931898.863 |
| White-naped Crane | -6228019.381 | 5907090.746 |
| White-naped Crane | -6192032.016 | 5988884.854 |
| White-naped Crane | -6172769.292 | 5945113.023 |
| White-naped Crane | -6172642.387 | 5943714.742 |
| White-naped Crane | -6179363.858 | 5931823.831 |
| White-naped Crane | -6192237.957 | 5988829.027 |
| White-naped Crane | -6172641.274 | 5943732.71  |
| White-naped Crane | -6173026.44  | 5930846.845 |
| White-naped Crane | -6228450.188 | 5907017.556 |
| White-naped Crane | -6191721.435 | 5989113.093 |
| White-naped Crane | -6179372.764 | 5931843.404 |

|                   |              |             |
|-------------------|--------------|-------------|
| White-naped Crane | -6175708.126 | 5926261.873 |
| White-naped Crane | -6177788.687 | 5947251.721 |
| White-naped Crane | -6227286.899 | 5904679.052 |
| White-naped Crane | -6179833.627 | 5932130.487 |
| White-naped Crane | -6226285.024 | 5905113.205 |
| White-naped Crane | -6175180.472 | 5929100.29  |
| White-naped Crane | -6173230.154 | 5946310.563 |
| White-naped Crane | -6173247.965 | 5946323.634 |
| White-naped Crane | -6175171.566 | 5929101.92  |
| White-naped Crane | -6179697.817 | 5932751.988 |
| White-naped Crane | -6227318.068 | 5904677.426 |
| White-naped Crane | -6192163.373 | 5988804.398 |
| White-naped Crane | -6175174.906 | 5929064.417 |
| White-naped Crane | -6179686.685 | 5932765.039 |
| White-naped Crane | -6192160.034 | 5988806.04  |
| White-naped Crane | -6227285.786 | 5904714.824 |
| White-naped Crane | -6173482.85  | 5946341.607 |
| White-naped Crane | -6173490.642 | 5946338.339 |
| White-naped Crane | -6179691.138 | 5932765.039 |
| White-naped Crane | -6175174.906 | 5929062.786 |
| White-naped Crane | -6227299.144 | 5904714.824 |
| White-naped Crane | -6173477.284 | 5946317.099 |
| White-naped Crane | -6192186.75  | 5988799.472 |
| White-naped Crane | -6173482.85  | 5946325.268 |
| White-naped Crane | -6179688.911 | 5932763.407 |
| White-naped Crane | -6175172.679 | 5929061.155 |
| White-naped Crane | -6192186.75  | 5988806.04  |
| White-naped Crane | -6173510.679 | 5946308.929 |
| White-naped Crane | -6173476.17  | 5946320.366 |
| White-naped Crane | -6173481.736 | 5946317.099 |
| White-naped Crane | -6173481.736 | 5946323.634 |
| White-naped Crane | -6175171.566 | 5929062.786 |
| White-naped Crane | -6192183.411 | 5988797.83  |
| White-naped Crane | -6227293.578 | 5904711.572 |
| White-naped Crane | -6179688.911 | 5932742.201 |
| White-naped Crane | -6175172.679 | 5929079.092 |
| White-naped Crane | -6192182.298 | 5988794.546 |
| White-naped Crane | -6179684.458 | 5932742.201 |
| White-naped Crane | -6227292.465 | 5904718.076 |
| White-naped Crane | -6173471.718 | 5946302.394 |
| White-naped Crane | -6173480.623 | 5946322     |
| White-naped Crane | -6192182.298 | 5988801.114 |
| White-naped Crane | -6179691.138 | 5932745.463 |
| White-naped Crane | -6173486.189 | 5946336.705 |
| White-naped Crane | -6227310.276 | 5904656.288 |
| White-naped Crane | -6175171.566 | 5929066.047 |
| White-naped Crane | -6173486.189 | 5946341.607 |
| White-naped Crane | -6175177.132 | 5929070.939 |
| White-naped Crane | -6192185.637 | 5988799.472 |
| White-naped Crane | -6179692.251 | 5932763.407 |
| White-naped Crane | -6227304.71  | 5904653.036 |
| White-naped Crane | -6173507.34  | 5946333.437 |
| White-naped Crane | -6173500.661 | 5946341.607 |
| White-naped Crane | -6173477.284 | 5946343.24  |
| White-naped Crane | -6175171.566 | 5929075.831 |
| White-naped Crane | -6192185.637 | 5988802.756 |
| White-naped Crane | -6227288.012 | 5904688.808 |
| White-naped Crane | -6179688.911 | 5932761.776 |

|                   |              |             |
|-------------------|--------------|-------------|
| White-naped Crane | -6179344.934 | 5932045.666 |
| White-naped Crane | -6194034.654 | 5988182.115 |
| White-naped Crane | -6170682.051 | 5936284.468 |
| White-naped Crane | -6171471.306 | 5945246.982 |
| White-naped Crane | -6170678.712 | 5936459.09  |
| White-naped Crane | -6194027.975 | 5988144.353 |
| White-naped Crane | -6227210.089 | 5907611.227 |
| White-naped Crane | -6179323.783 | 5932001.625 |
| White-naped Crane | -6172053.507 | 5943571.007 |
| White-naped Crane | -6172120.299 | 5943575.907 |
| White-naped Crane | -6191863.924 | 5988998.152 |
| White-naped Crane | -6179299.293 | 5931874.396 |
| White-naped Crane | -6175025.738 | 5932414.317 |
| White-naped Crane | -6173408.265 | 5945305.795 |
| White-naped Crane | -6173409.379 | 5945295.993 |
| White-naped Crane | -6191863.924 | 5988998.152 |
| White-naped Crane | -6175090.303 | 5932355.593 |
| White-naped Crane | -6227271.314 | 5904664.418 |
| White-naped Crane | -6172759.273 | 5945949.486 |
| White-naped Crane | -6172797.121 | 5946148.812 |
| White-naped Crane | -6191789.34  | 5988980.09  |
| White-naped Crane | -6174855.419 | 5932313.181 |
| White-naped Crane | -6179367.198 | 5931871.133 |
| White-naped Crane | -6191796.019 | 5988976.806 |
| White-naped Crane | -6174805.325 | 5932311.55  |
| White-naped Crane | -6172799.348 | 5946125.938 |
| White-naped Crane | -6179258.105 | 5931910.281 |
| White-naped Crane | -6228426.811 | 5906932.982 |
| White-naped Crane | -6172798.235 | 5946165.15  |
| White-naped Crane | -6191792.679 | 5988981.732 |
| White-naped Crane | -6172897.309 | 5946238.673 |
| White-naped Crane | -6178434.341 | 5932740.569 |
| White-naped Crane | -6172957.422 | 5946228.87  |
| White-naped Crane | -6178415.416 | 5932691.631 |
| White-naped Crane | -6191753.718 | 5988998.152 |
| White-naped Crane | -6172903.988 | 5946336.705 |
| White-naped Crane | -6172964.101 | 5930815.857 |
| White-naped Crane | -6229202.707 | 5906682.516 |
| White-naped Crane | -6172905.101 | 5946361.213 |
| White-naped Crane | -6172900.649 | 5946225.603 |
| White-naped Crane | -6178956.429 | 5933032.576 |
| White-naped Crane | -6172683.576 | 5946259.913 |
| White-naped Crane | -6173096.571 | 5931554.7   |
| White-naped Crane | -6191754.831 | 5989026.066 |
| White-naped Crane | -6229198.255 | 5906661.373 |
| White-naped Crane | -6178919.693 | 5933303.384 |
| White-naped Crane | -6172856.121 | 5946214.166 |
| White-naped Crane | -6172851.668 | 5946171.686 |
| White-naped Crane | -6191715.869 | 5989109.809 |
| White-naped Crane | -6228476.904 | 5906972.016 |
| White-naped Crane | -6173027.553 | 5931060.5   |
| White-naped Crane | -6172968.554 | 5946287.689 |
| White-naped Crane | -6173046.477 | 5931088.227 |
| White-naped Crane | -6191820.509 | 5989185.342 |
| White-naped Crane | -6228439.056 | 5906944.367 |
| White-naped Crane | -6179326.01  | 5931907.018 |
| White-naped Crane | -6172670.217 | 5946132.474 |
| White-naped Crane | -6171925.49  | 5943641.241 |

|                   |              |             |
|-------------------|--------------|-------------|
| White-naped Crane | -6179344.934 | 5931890.707 |
| White-naped Crane | -6173027.553 | 5931071.917 |
| White-naped Crane | -6192321.447 | 5988809.324 |
| White-naped Crane | -6171926.603 | 5943639.608 |
| White-naped Crane | -6228257.605 | 5906950.872 |
| White-naped Crane | -6179391.688 | 5931900.494 |
| White-naped Crane | -6229427.573 | 5906719.923 |
| White-naped Crane | -6173003.063 | 5931068.655 |
| White-naped Crane | -6171850.906 | 5943639.608 |
| White-naped Crane | -6192629.802 | 5989277.297 |
| White-naped Crane | -6173774.507 | 5944456.326 |
| White-naped Crane | -6179334.915 | 5932075.027 |
| White-naped Crane | -6191243.874 | 5988699.313 |
| White-naped Crane | -6173771.167 | 5944444.891 |
| White-naped Crane | -6170748.843 | 5936584.755 |
| White-naped Crane | -6228106.21  | 5906950.872 |
| White-naped Crane | -6174542.611 | 5944859.813 |
| White-naped Crane | -6179311.538 | 5931880.92  |
| White-naped Crane | -6191242.761 | 5988689.461 |
| White-naped Crane | -6174673.968 | 5935612.125 |
| White-naped Crane | -6174539.272 | 5944863.08  |
| White-naped Crane | -6175006.813 | 5944439.991 |
| White-naped Crane | -6175004.587 | 5944441.624 |
| White-naped Crane | -6174724.062 | 5935561.538 |
| White-naped Crane | -6179312.651 | 5931920.068 |
| White-naped Crane | -6191276.157 | 5988692.745 |
| White-naped Crane | -6228127.361 | 5907067.976 |
| White-naped Crane | -6175009.04  | 5944466.127 |
| White-naped Crane | -6175009.04  | 5944474.294 |
| White-naped Crane | -6191273.931 | 5988679.609 |
| White-naped Crane | -6179318.217 | 5931931.485 |
| White-naped Crane | -6228128.474 | 5907080.988 |
| White-naped Crane | -6174727.401 | 5935559.906 |
| White-naped Crane | -6191272.817 | 5988682.893 |
| White-naped Crane | -6179318.217 | 5931921.699 |
| White-naped Crane | -6228126.248 | 5907054.964 |
| White-naped Crane | -6174991.229 | 5944448.158 |
| White-naped Crane | -6175001.247 | 5944446.525 |
| White-naped Crane | -6174726.288 | 5935568.065 |
| White-naped Crane | -6174984.549 | 5944448.158 |
| White-naped Crane | -6191278.383 | 5988687.819 |
| White-naped Crane | -6174726.288 | 5935566.434 |
| White-naped Crane | -6179317.104 | 5931928.223 |
| White-naped Crane | -6228120.682 | 5907053.338 |
| White-naped Crane | -6175004.587 | 5944457.959 |
| White-naped Crane | -6175039.096 | 5944466.127 |
| White-naped Crane | -6191272.817 | 5988681.251 |
| White-naped Crane | -6179317.104 | 5931921.699 |
| White-naped Crane | -6174729.628 | 5935563.17  |
| White-naped Crane | -6175005.7   | 5944444.891 |
| White-naped Crane | -6228126.248 | 5907061.47  |
| White-naped Crane | -6191271.704 | 5988686.177 |
| White-naped Crane | -6179318.217 | 5931920.068 |
| White-naped Crane | -6174721.835 | 5935572.961 |
| White-naped Crane | -6175007.927 | 5944466.127 |
| White-naped Crane | -6228120.682 | 5907064.723 |
| White-naped Crane | -6175006.813 | 5944451.425 |
| White-naped Crane | -6175023.511 | 5944454.692 |



|                   |              |             |
|-------------------|--------------|-------------|
| White-naped Crane | -6174999.021 | 5944454.692 |
| White-naped Crane | -6179319.33  | 5931924.961 |
| White-naped Crane | -6191270.591 | 5988684.535 |
| White-naped Crane | -6174729.628 | 5935564.802 |
| White-naped Crane | -6228121.795 | 5907064.723 |
| White-naped Crane | -6174729.628 | 5935561.538 |
| White-naped Crane | -6191277.27  | 5988687.819 |
| White-naped Crane | -6228129.588 | 5907056.591 |
| White-naped Crane | -6179315.991 | 5931920.068 |
| White-naped Crane | -6174993.455 | 5944446.525 |
| White-naped Crane | -6175009.04  | 5944451.425 |
| White-naped Crane | -6175012.379 | 5944461.226 |
| White-naped Crane | -6175026.851 | 5944457.959 |
| White-naped Crane | -6174345.576 | 5934876.198 |
| White-naped Crane | -6191291.742 | 5988697.671 |
| White-naped Crane | -6228160.757 | 5907032.194 |
| White-naped Crane | -6172140.336 | 5943580.807 |
| White-naped Crane | -6192659.858 | 5989543.314 |
| White-naped Crane | -6228206.398 | 5906923.223 |
| White-naped Crane | -6180269.999 | 5932102.757 |
| White-naped Crane | -6171941.075 | 5943348.875 |
| White-naped Crane | -6171783.001 | 5943874.814 |
| White-naped Crane | -6171747.379 | 5936055.996 |
| White-naped Crane | -6192646.5   | 5989561.377 |
| White-naped Crane | -6228335.529 | 5907006.171 |
| White-naped Crane | -6171882.075 | 5937433.448 |
| White-naped Crane | -6192655.405 | 5989564.661 |
| White-naped Crane | -6227965.948 | 5907120.023 |
| White-naped Crane | -6174517.008 | 5945421.786 |
| White-naped Crane | -6178422.095 | 5932861.286 |
| White-naped Crane | -6174488.065 | 5945436.49  |
| White-naped Crane | -6173260.211 | 5946330.17  |
| White-naped Crane | -6178298.531 | 5932960.797 |
| White-naped Crane | -6191709.19  | 5989108.167 |
| White-naped Crane | -6173260.211 | 5946282.787 |
| White-naped Crane | -6174918.871 | 5933458.369 |
| White-naped Crane | -6228042.758 | 5907124.902 |
| White-naped Crane | -6173221.249 | 5946390.623 |
| White-naped Crane | -6191738.133 | 5989067.116 |
| White-naped Crane | -6178370.888 | 5933019.525 |
| White-naped Crane | -6228150.738 | 5907032.194 |
| White-naped Crane | -6173439.435 | 5931098.013 |
| White-naped Crane | -6180449.223 | 5933179.399 |
| White-naped Crane | -6173270.229 | 5931282.316 |
| White-naped Crane | -6173222.362 | 5946447.809 |
| White-naped Crane | -6191731.454 | 5989099.957 |
| White-naped Crane | -6173223.475 | 5946460.88  |
| White-naped Crane | -6228509.187 | 5906890.695 |
| White-naped Crane | -6173144.438 | 5946372.65  |
| White-naped Crane | -6191669.115 | 5989049.054 |
| White-naped Crane | -6173013.081 | 5930700.062 |
| White-naped Crane | -6180050.7   | 5932389.848 |
| White-naped Crane | -6228434.603 | 5907001.292 |
| White-naped Crane | -6173265.777 | 5946387.355 |
| White-naped Crane | -6179775.74  | 5932277.294 |
| White-naped Crane | -6191986.375 | 5989068.758 |
| White-naped Crane | -6173011.968 | 5930696.8   |
| White-naped Crane | -6173145.551 | 5946336.705 |

|                   |              |             |
|-------------------|--------------|-------------|
| White-naped Crane | -6228419.018 | 5907048.459 |
| White-naped Crane | -6173162.249 | 5946256.646 |
| White-naped Crane | -6174396.783 | 5946532.772 |
| White-naped Crane | -6174387.877 | 5946554.012 |
| White-naped Crane | -6179408.386 | 5931908.65  |
| White-naped Crane | -6191986.375 | 5989058.906 |
| White-naped Crane | -6227392.653 | 5907585.202 |
| White-naped Crane | -6176563.06  | 5945622.733 |
| White-naped Crane | -6191777.095 | 5988980.09  |
| White-naped Crane | -6179367.198 | 5931822.2   |
| White-naped Crane | -6230089.924 | 5909363.201 |
| White-naped Crane | -6173618.659 | 5931489.458 |
| White-naped Crane | -6176617.606 | 5945658.676 |
| White-naped Crane | -6191793.793 | 5988986.658 |
| White-naped Crane | -6173627.565 | 5931499.244 |
| White-naped Crane | -6179560.894 | 5931900.494 |
| White-naped Crane | -6229340.744 | 5906732.934 |
| White-naped Crane | -6179769.061 | 5932024.461 |
| White-naped Crane | -6173224.588 | 5946089.994 |
| White-naped Crane | -6191792.679 | 5988980.09  |
| White-naped Crane | -6172789.329 | 5943345.608 |
| White-naped Crane | -6191789.34  | 5988976.806 |
| White-naped Crane | -6226785.961 | 5904537.591 |
| White-naped Crane | -6170493.921 | 5936196.342 |
| White-naped Crane | -6172967.44  | 5934856.617 |
| White-naped Crane | -6171783.001 | 5936867.099 |
| White-naped Crane | -6191782.661 | 5988955.46  |
| White-naped Crane | -6172962.988 | 5934890.883 |
| White-naped Crane | -6173047.59  | 5934817.457 |
| White-naped Crane | -6224677.57  | 5903023.942 |
| White-naped Crane | -6192355.956 | 5988799.472 |
| White-naped Crane | -6227073.166 | 5904487.186 |
| White-naped Crane | -6171662.776 | 5937048.261 |
| White-naped Crane | -6174167.464 | 5934988.785 |
| White-naped Crane | -6174213.105 | 5934975.732 |
| White-naped Crane | -6174293.255 | 5934913.727 |
| White-naped Crane | -6174297.708 | 5934916.99  |
| White-naped Crane | -6180213.226 | 5932301.762 |
| White-naped Crane | -6192304.749 | 5988784.694 |
| White-naped Crane | -6174303.274 | 5934902.305 |
| White-naped Crane | -6229161.519 | 5906721.549 |
| White-naped Crane | -6174296.595 | 5934921.885 |
| White-naped Crane | -6180216.566 | 5932309.918 |
| White-naped Crane | -6174297.708 | 5934916.99  |
| White-naped Crane | -6192301.409 | 5988787.978 |
| White-naped Crane | -6229167.085 | 5906723.176 |
| White-naped Crane | -6174316.633 | 5934908.832 |
| White-naped Crane | -6192325.9   | 5988779.768 |
| White-naped Crane | -6174399.009 | 5934869.671 |
| White-naped Crane | -6180162.019 | 5932311.55  |
| White-naped Crane | -6229245.009 | 5906775.22  |
| White-naped Crane | -6174604.95  | 5934990.417 |
| White-naped Crane | -6174395.669 | 5934876.198 |
| White-naped Crane | -6174397.896 | 5934881.093 |
| White-naped Crane | -6180162.019 | 5932318.075 |
| White-naped Crane | -6174593.818 | 5934944.729 |
| White-naped Crane | -6229196.028 | 5906745.945 |
| White-naped Crane | -6174409.028 | 5934861.512 |

|                   |              |             |
|-------------------|--------------|-------------|
| White-naped Crane | -6192327.013 | 5988779.768 |
| White-naped Crane | -6192324.787 | 5988779.768 |
| White-naped Crane | -6174395.669 | 5934877.829 |
| White-naped Crane | -6180155.34  | 5932319.706 |
| White-naped Crane | -6229171.538 | 5906757.33  |
| White-naped Crane | -6174392.33  | 5934877.829 |
| White-naped Crane | -6180154.227 | 5932319.706 |
| White-naped Crane | -6229167.085 | 5906760.583 |
| White-naped Crane | -6192328.126 | 5988781.41  |
| White-naped Crane | -6174395.669 | 5934877.829 |
| White-naped Crane | -6174589.365 | 5934965.941 |
| White-naped Crane | -6174594.931 | 5934959.415 |
| White-naped Crane | -6175436.507 | 5935762.255 |
| White-naped Crane | -6229168.198 | 5906897.2   |
| White-naped Crane | -6180149.774 | 5932316.443 |
| White-naped Crane | -6192323.673 | 5988783.052 |
| White-naped Crane | -6192328.126 | 5988779.768 |
| White-naped Crane | -6175429.827 | 5935767.151 |
| White-naped Crane | -6229159.293 | 5906893.948 |
| White-naped Crane | -6180153.113 | 5932314.812 |
| White-naped Crane | -6174593.818 | 5934954.519 |
| White-naped Crane | -6175515.543 | 5935559.906 |
| White-naped Crane | -6175489.94  | 5935559.906 |
| White-naped Crane | -6175432.054 | 5935768.783 |
| White-naped Crane | -6192285.825 | 5988784.694 |
| White-naped Crane | -6229186.01  | 5906884.189 |
| White-naped Crane | -6180152     | 5932311.55  |
| White-naped Crane | -6174577.12  | 5934941.466 |
| White-naped Crane | -6171638.286 | 5937211.474 |
| White-naped Crane | -6170550.694 | 5936439.506 |
| White-naped Crane | -6191572.267 | 5989535.104 |
| White-naped Crane | -6179676.666 | 5932709.575 |
| White-naped Crane | -6171632.72  | 5937234.324 |
| White-naped Crane | -6228199.719 | 5907028.941 |
| White-naped Crane | -6170501.714 | 5936375.859 |
| White-naped Crane | -6171549.23  | 5937297.978 |
| White-naped Crane | -6178916.354 | 5933163.085 |
| White-naped Crane | -6191546.663 | 5989517.04  |
| White-naped Crane | -6228022.721 | 5907131.408 |
| White-naped Crane | -6171602.663 | 5937234.324 |
| White-naped Crane | -6178875.166 | 5932365.38  |
| White-naped Crane | -6191543.324 | 5989523.609 |
| White-naped Crane | -6171571.494 | 5937170.67  |
| White-naped Crane | -6171602.663 | 5937231.06  |
| White-naped Crane | -6171528.079 | 5937089.064 |
| White-naped Crane | -6179339.368 | 5931843.404 |
| White-naped Crane | -6229150.387 | 5906877.684 |
| White-naped Crane | -6174307.727 | 5935063.845 |
| White-naped Crane | -6174304.387 | 5935081.794 |
| White-naped Crane | -6174233.143 | 5935351.035 |
| White-naped Crane | -6191699.171 | 5989104.883 |
| White-naped Crane | -6173933.693 | 5934159.912 |
| White-naped Crane | -6191782.661 | 5988999.794 |
| White-naped Crane | -6179359.405 | 5931760.217 |
| White-naped Crane | -6174019.41  | 5934239.859 |
| White-naped Crane | -6173836.846 | 5934181.122 |
| White-naped Crane | -6228787.486 | 5906731.308 |
| White-naped Crane | -6173920.335 | 5934182.754 |

|                   |              |             |
|-------------------|--------------|-------------|
| White-naped Crane | -6191796.019 | 5988976.806 |
| White-naped Crane | -6173924.788 | 5934179.491 |
| White-naped Crane | -6174008.278 | 5934372.018 |
| White-naped Crane | -6174923.324 | 5934752.189 |
| White-naped Crane | -6191708.077 | 5989108.167 |
| White-naped Crane | -6180164.245 | 5933187.555 |
| White-naped Crane | -6173961.523 | 5934388.334 |
| White-naped Crane | -6173932.58  | 5934543.338 |
| White-naped Crane | -6229514.402 | 5908346.46  |
| White-naped Crane | -6174024.975 | 5934577.602 |
| White-naped Crane | -6191570.04  | 5989518.682 |
| White-naped Crane | -6179406.16  | 5931893.969 |
| White-naped Crane | -6229202.707 | 5906680.89  |
| White-naped Crane | -6174927.777 | 5934760.348 |
| White-naped Crane | -6173940.373 | 5934850.09  |
| White-naped Crane | -6171718.436 | 5937227.795 |
| White-naped Crane | -6171709.53  | 5937240.852 |
| White-naped Crane | -6178534.528 | 5933443.686 |
| White-naped Crane | -6191536.645 | 5989554.809 |
| White-naped Crane | -6228381.17  | 5906981.775 |
| White-naped Crane | -6173990.466 | 5934572.707 |
| White-naped Crane | -6173900.298 | 5934796.245 |
| White-naped Crane | -6191737.02  | 5989116.377 |
| White-naped Crane | -6178154.929 | 5933373.535 |
| White-naped Crane | -6228411.226 | 5906911.838 |
| White-naped Crane | -6173013.081 | 5930799.548 |
| White-naped Crane | -6179482.97  | 5931791.209 |
| White-naped Crane | -6192215.693 | 5989410.304 |
| White-naped Crane | -6173886.939 | 5934820.72  |
| White-naped Crane | -6173001.949 | 5930784.87  |
| White-naped Crane | -6228505.847 | 5907004.545 |
| White-naped Crane | -6170948.105 | 5936996.034 |
| White-naped Crane | -6179411.726 | 5931902.125 |
| White-naped Crane | -6173893.618 | 5934781.56  |
| White-naped Crane | -6192247.976 | 5989482.556 |
| White-naped Crane | -6173289.154 | 5931447.05  |
| White-naped Crane | -6228085.06  | 5907038.7   |
| White-naped Crane | -6179368.311 | 5932068.502 |
| White-naped Crane | -6193033.892 | 5989829.045 |
| White-naped Crane | -6173975.995 | 5935551.747 |
| White-naped Crane | -6228342.208 | 5906983.401 |
| White-naped Crane | -6179342.708 | 5932050.56  |
| White-naped Crane | -6228278.756 | 5906932.982 |
| White-naped Crane | -6191654.643 | 5989037.56  |
| White-naped Crane | -6191734.793 | 5989090.104 |
| White-naped Crane | -6179362.745 | 5931838.511 |
| White-naped Crane | -6228538.13  | 5907014.303 |
| White-naped Crane | -6175383.073 | 5936664.724 |
| White-naped Crane | -6175353.017 | 5936658.196 |
| White-naped Crane | -6175356.357 | 5936638.612 |
| White-naped Crane | -6174488.065 | 5935509.32  |
| White-naped Crane | -6179358.292 | 5932107.651 |
| White-naped Crane | -6175350.791 | 5936654.932 |
| White-naped Crane | -6228561.507 | 5907017.556 |
| White-naped Crane | -6191729.227 | 5989101.599 |
| White-naped Crane | -6175364.149 | 5936658.196 |
| White-naped Crane | -6174482.499 | 5935509.32  |
| White-naped Crane | -6179357.179 | 5932106.019 |

|                   |              |             |
|-------------------|--------------|-------------|
| White-naped Crane | -6191732.567 | 5989103.241 |
| White-naped Crane | -6175361.923 | 5936672.884 |
| White-naped Crane | -6228560.394 | 5907025.688 |
| White-naped Crane | -6228557.054 | 5907020.809 |
| White-naped Crane | -6179357.179 | 5932099.495 |
| White-naped Crane | -6191733.68  | 5989101.599 |
| White-naped Crane | -6174482.499 | 5935496.265 |
| White-naped Crane | -6175348.564 | 5936650.036 |
| White-naped Crane | -6175398.658 | 5936654.932 |
| White-naped Crane | -6174460.235 | 5935545.22  |
| White-naped Crane | -6179354.953 | 5932102.757 |
| White-naped Crane | -6175369.715 | 5936643.508 |
| White-naped Crane | -6228557.054 | 5907025.688 |
| White-naped Crane | -6175358.583 | 5936640.244 |
| White-naped Crane | -6191731.454 | 5989099.957 |
| White-naped Crane | -6179371.651 | 5932104.388 |
| White-naped Crane | -6175357.47  | 5936646.772 |
| White-naped Crane | -6174459.121 | 5935558.274 |
| White-naped Crane | -6228554.828 | 5907024.062 |
| White-naped Crane | -6191730.34  | 5989104.883 |
| White-naped Crane | -6175340.772 | 5936648.404 |
| White-naped Crane | -6174473.593 | 5935550.115 |
| White-naped Crane | -6175361.923 | 5936645.14  |
| White-naped Crane | -6191731.454 | 5989109.809 |
| White-naped Crane | -6228555.941 | 5907020.809 |
| White-naped Crane | -6175368.602 | 5936645.14  |
| White-naped Crane | -6179367.198 | 5932115.806 |
| White-naped Crane | -6174460.235 | 5935566.434 |
| White-naped Crane | -6191733.68  | 5989111.451 |
| White-naped Crane | -6228553.715 | 5907025.688 |
| White-naped Crane | -6175365.262 | 5936643.508 |
| White-naped Crane | -6179364.971 | 5932114.175 |
| White-naped Crane | -6228554.828 | 5907024.062 |
| White-naped Crane | -6191730.34  | 5989104.883 |
| White-naped Crane | -6175364.149 | 5936648.404 |
| White-naped Crane | -6179362.745 | 5932115.806 |
| White-naped Crane | -6175367.489 | 5936645.14  |
| White-naped Crane | -6174456.895 | 5935558.274 |
| White-naped Crane | -6175364.149 | 5936638.612 |
| White-naped Crane | -6174440.197 | 5935551.747 |
| White-naped Crane | -6228533.677 | 5906905.333 |
| White-naped Crane | -6179348.274 | 5931952.69  |
| White-naped Crane | -6191737.02  | 5989108.167 |
| White-naped Crane | -6175366.375 | 5936638.612 |
| White-naped Crane | -6171662.776 | 5937412.229 |
| White-naped Crane | -6178447.699 | 5932755.251 |
| White-naped Crane | -6228411.226 | 5906919.97  |
| White-naped Crane | -6193643.923 | 5989894.732 |
| White-naped Crane | -6171902.113 | 5937541.173 |
| White-naped Crane | -6171806.378 | 5937508.529 |
| White-naped Crane | -6171911.018 | 5937531.379 |
| White-naped Crane | -6172158.148 | 5937502     |
| White-naped Crane | -6193708.488 | 5989965.346 |
| White-naped Crane | -6178868.487 | 5932525.241 |
| White-naped Crane | -6228306.586 | 5906960.631 |
| White-naped Crane | -6171983.376 | 5937614.622 |
| White-naped Crane | -6178605.773 | 5932916.751 |
| White-naped Crane | -6191244.988 | 5989186.984 |

|                   |              |             |
|-------------------|--------------|-------------|
| White-naped Crane | -6173908.09  | 5934820.72  |
| White-naped Crane | -6173908.09  | 5934838.669 |
| White-naped Crane | -6172886.177 | 5945972.36  |
| White-naped Crane | -6178486.661 | 5933119.038 |
| White-naped Crane | -6173901.411 | 5934866.407 |
| White-naped Crane | -6173902.524 | 5934838.669 |
| White-naped Crane | -6191299.534 | 5989270.729 |
| White-naped Crane | -6173048.704 | 5946405.328 |
| White-naped Crane | -6229226.085 | 5906760.583 |
| White-naped Crane | -6179313.764 | 5931910.281 |
| White-naped Crane | -6191303.987 | 5989265.802 |
| White-naped Crane | -6229194.915 | 5906719.923 |
| White-naped Crane | -6175206.075 | 5933955.969 |
| White-naped Crane | -6173206.777 | 5946323.634 |
| White-naped Crane | -6172960.761 | 5931226.861 |
| White-naped Crane | -6173563     | 5931562.856 |
| White-naped Crane | -6172750.367 | 5945328.666 |
| White-naped Crane | -6191715.869 | 5989108.167 |
| White-naped Crane | -6179418.405 | 5932079.921 |
| White-naped Crane | -6175214.981 | 5934088.123 |
| White-naped Crane | -6229230.537 | 5906739.439 |
| White-naped Crane | -6179352.726 | 5932068.502 |
| White-naped Crane | -6172629.029 | 5945351.538 |
| White-naped Crane | -6191712.529 | 5989172.206 |
| White-naped Crane | -6173564.113 | 5931530.234 |
| White-naped Crane | -6173569.679 | 5931551.438 |
| White-naped Crane | -6229224.971 | 5908204.939 |
| White-naped Crane | -6172632.369 | 5945343.369 |
| White-naped Crane | -6191714.756 | 5989159.07  |
| White-naped Crane | -6173005.289 | 5930695.169 |
| White-naped Crane | -6173116.608 | 5945977.261 |
| White-naped Crane | -6192085.45  | 5989260.876 |
| White-naped Crane | -6178177.192 | 5932983.636 |
| White-naped Crane | -6173039.798 | 5930704.955 |
| White-naped Crane | -6173023.1   | 5930727.788 |
| White-naped Crane | -6229209.387 | 5906672.758 |
| White-naped Crane | -6173049.817 | 5930690.277 |
| White-naped Crane | -6178346.398 | 5932818.872 |
| White-naped Crane | -6192305.862 | 5989505.546 |
| White-naped Crane | -6173006.402 | 5930801.179 |
| White-naped Crane | -6229206.047 | 5906729.681 |
| White-naped Crane | -6171528.079 | 5943798.045 |
| White-naped Crane | -6178536.754 | 5932637.798 |
| White-naped Crane | -6173456.133 | 5931517.186 |
| White-naped Crane | -6173466.152 | 5931515.555 |
| White-naped Crane | -6191773.755 | 5988986.658 |
| White-naped Crane | -6172507.691 | 5944923.523 |
| White-naped Crane | -6191722.548 | 5989142.649 |
| White-naped Crane | -6179354.953 | 5931882.551 |
| White-naped Crane | -6173428.303 | 5931698.236 |
| White-naped Crane | -6173473.944 | 5931678.662 |
| White-naped Crane | -6229223.858 | 5906736.187 |
| White-naped Crane | -6171592.645 | 5937371.425 |
| White-naped Crane | -6171486.891 | 5943595.507 |
| White-naped Crane | -6192537.407 | 5989387.315 |
| White-naped Crane | -6179764.608 | 5932003.256 |
| White-naped Crane | -6229374.139 | 5908172.406 |
| White-naped Crane | -6171557.022 | 5937340.414 |

|                   |              |             |
|-------------------|--------------|-------------|
| White-naped Crane | -6192097.695 | 5989104.883 |
| White-naped Crane | -6173793.431 | 5943548.14  |
| White-naped Crane | -6179770.174 | 5932003.256 |
| White-naped Crane | -6229233.877 | 5908185.419 |
| White-naped Crane | -6171923.263 | 5937516.69  |
| White-naped Crane | -6179773.514 | 5932278.925 |
| White-naped Crane | -6174106.239 | 5936785.496 |
| White-naped Crane | -6192351.503 | 5988799.472 |
| White-naped Crane | -6174109.578 | 5936752.855 |
| White-naped Crane | -6173832.393 | 5943553.04  |
| White-naped Crane | -6174108.465 | 5936759.383 |
| White-naped Crane | -6192306.975 | 5988783.052 |
| White-naped Crane | -6179641.044 | 5932952.64  |
| White-naped Crane | -6174110.691 | 5936751.223 |
| White-naped Crane | -6173500.661 | 5945970.726 |
| White-naped Crane | -6173495.095 | 5945960.923 |
| White-naped Crane | -6192341.484 | 5988787.978 |
| White-naped Crane | -6179642.157 | 5932962.428 |
| White-naped Crane | -6174115.144 | 5936749.591 |
| White-naped Crane | -6228954.465 | 5908177.286 |
| White-naped Crane | -6179661.081 | 5932947.746 |
| White-naped Crane | -6173456.133 | 5945967.458 |
| White-naped Crane | -6174911.079 | 5936669.62  |
| White-naped Crane | -6192331.466 | 5988760.065 |
| White-naped Crane | -6174891.041 | 5936654.932 |
| White-naped Crane | -6228957.805 | 5908167.526 |
| White-naped Crane | -6174902.173 | 5936658.196 |
| White-naped Crane | -6174908.852 | 5936676.149 |
| White-naped Crane | -6179657.742 | 5932949.377 |
| White-naped Crane | -6228956.691 | 5908167.526 |
| White-naped Crane | -6192324.787 | 5988781.41  |
| White-naped Crane | -6173450.567 | 5945983.796 |
| White-naped Crane | -6173427.19  | 5945985.43  |
| White-naped Crane | -6192188.977 | 5988789.62  |
| White-naped Crane | -6179657.742 | 5932954.271 |
| White-naped Crane | -6228953.352 | 5908169.152 |
| White-naped Crane | -6174908.852 | 5936685.941 |
| White-naped Crane | -6174899.947 | 5936681.045 |
| White-naped Crane | -6174902.173 | 5936676.149 |
| White-naped Crane | -6192191.203 | 5988792.904 |
| White-naped Crane | -6228957.805 | 5908170.779 |
| White-naped Crane | -6179659.968 | 5932954.271 |
| White-naped Crane | -6174903.286 | 5936681.045 |
| White-naped Crane | -6173457.246 | 5945967.458 |
| White-naped Crane | -6174902.173 | 5936689.205 |
| White-naped Crane | -6179659.968 | 5932957.534 |
| White-naped Crane | -6192192.316 | 5988796.188 |
| White-naped Crane | -6228955.578 | 5908174.032 |
| White-naped Crane | -6173514.019 | 5945991.965 |
| White-naped Crane | -6174903.286 | 5936681.045 |
| White-naped Crane | -6228958.918 | 5908174.032 |
| White-naped Crane | -6173505.113 | 5945988.698 |
| White-naped Crane | -6174904.399 | 5936677.781 |
| White-naped Crane | -6174899.947 | 5936663.092 |
| White-naped Crane | -6179658.855 | 5932951.009 |
| White-naped Crane | -6192338.145 | 5988774.842 |
| White-naped Crane | -6174253.18  | 5937133.132 |
| White-naped Crane | -6173509.566 | 5945991.965 |

|                   |              |             |
|-------------------|--------------|-------------|
| White-naped Crane | -6179656.629 | 5932951.009 |
| White-naped Crane | -6229030.162 | 5908213.072 |
| White-naped Crane | -6174255.407 | 5937129.867 |
| White-naped Crane | -6192338.145 | 5988779.768 |
| White-naped Crane | -6171997.848 | 5937640.737 |
| White-naped Crane | -6171712.87  | 5943455.04  |
| White-naped Crane | -6171983.376 | 5937634.209 |
| White-naped Crane | -6193205.324 | 5989756.791 |
| White-naped Crane | -6171663.889 | 5936989.506 |
| White-naped Crane | -6229082.482 | 5908227.712 |
| White-naped Crane | -6172139.223 | 5937678.279 |
| White-naped Crane | -6171750.718 | 5943360.308 |
| White-naped Crane | -6229448.724 | 5908050.407 |
| White-naped Crane | -6193346.699 | 5989930.86  |
| White-naped Crane | -6172132.544 | 5937879.045 |
| White-naped Crane | -6229322.933 | 5907936.544 |
| White-naped Crane | -6185201.452 | 5986724.279 |
| White-naped Crane | -6173470.604 | 5933998.389 |
| White-naped Crane | -6178448.812 | 5932753.62  |
| White-naped Crane | -6172611.218 | 5945278.022 |
| White-naped Crane | -6172446.465 | 5937647.266 |
| White-naped Crane | -6173497.321 | 5933983.705 |
| White-naped Crane | -6178399.831 | 5932871.074 |
| White-naped Crane | -6173830.166 | 5935941.762 |
| White-naped Crane | -6172703.613 | 5945209.408 |
| White-naped Crane | -6188764.789 | 5987730.619 |
| White-naped Crane | -6178311.889 | 5933058.678 |
| White-naped Crane | -6228675.053 | 5907633.999 |
| White-naped Crane | -6172839.423 | 5945460.995 |
| White-naped Crane | -6173157.797 | 5934414.439 |
| White-naped Crane | -6173646.489 | 5933587.252 |
| White-naped Crane | -6172920.686 | 5945738.729 |
| White-naped Crane | -6228125.135 | 5907080.988 |
| White-naped Crane | -6172153.695 | 5937859.458 |
| White-naped Crane | -6179772.401 | 5932004.887 |
| White-naped Crane | -6172995.27  | 5946037.712 |
| White-naped Crane | -6229240.556 | 5906693.901 |
| White-naped Crane | -6174852.079 | 5935196.016 |
| White-naped Crane | -6174835.381 | 5935213.966 |
| White-naped Crane | -6174274.331 | 5936297.524 |
| White-naped Crane | -6179772.401 | 5932014.674 |
| White-naped Crane | -6174382.311 | 5935995.615 |
| White-naped Crane | -6229209.387 | 5906731.308 |
| White-naped Crane | -6173187.853 | 5946286.055 |
| White-naped Crane | -6179838.079 | 5931988.576 |
| White-naped Crane | -6229227.198 | 5906726.428 |
| White-naped Crane | -6174340.01  | 5936276.308 |
| White-naped Crane | -6175157.095 | 5919581.177 |
| White-naped Crane | -6173186.74  | 5946284.421 |
| White-naped Crane | -6175157.095 | 5919582.806 |
| White-naped Crane | -6180088.548 | 5932482.829 |
| White-naped Crane | -6174346.689 | 5936289.364 |
| White-naped Crane | -6175842.823 | 5918965.51  |
| White-naped Crane | -6179667.76  | 5931424.216 |
| White-naped Crane | -6173974.882 | 5936457.458 |
| White-naped Crane | -6227993.778 | 5907089.12  |
| White-naped Crane | -6195390.525 | 5913818.751 |
| White-naped Crane | -6173144.438 | 5946156.981 |



|                   |              |             |
|-------------------|--------------|-------------|
| White-naped Crane | -6179364.971 | 5931840.142 |
| White-naped Crane | -6175831.691 | 5918968.768 |
| White-naped Crane | -6227991.551 | 5907142.793 |
| White-naped Crane | -6173948.165 | 5936462.354 |
| White-naped Crane | -6179184.634 | 5931999.994 |
| White-naped Crane | -6172151.468 | 5937575.449 |
| White-naped Crane | -6173171.155 | 5946158.615 |
| White-naped Crane | -6227962.608 | 5907118.396 |
| White-naped Crane | -6196946.772 | 5914723.812 |
| White-naped Crane | -6171828.642 | 5937368.161 |
| White-naped Crane | -6179654.402 | 5932009.781 |
| White-naped Crane | -6171741.813 | 5943626.541 |
| White-naped Crane | -6196966.809 | 5914725.439 |
| White-naped Crane | -6225921.009 | 5905253.049 |
| White-naped Crane | -6171786.341 | 5937482.413 |
| White-naped Crane | -6174771.929 | 5943842.146 |
| White-naped Crane | -6179776.854 | 5931980.42  |
| White-naped Crane | -6196980.168 | 5914771.021 |
| White-naped Crane | -6228218.643 | 5906908.585 |
| White-naped Crane | -6176199.045 | 5919752.204 |
| White-naped Crane | -6228243.133 | 5907022.436 |
| White-naped Crane | -6179743.458 | 5931973.895 |
| White-naped Crane | -6195900.369 | 5914482.887 |
| White-naped Crane | -6176196.819 | 5919757.09  |
| White-naped Crane | -6174938.908 | 5943739.243 |
| White-naped Crane | -6174938.908 | 5943739.243 |
| White-naped Crane | -6179745.684 | 5931980.42  |
| White-naped Crane | -6195902.595 | 5914487.771 |
| White-naped Crane | -6228252.039 | 5907054.964 |
| White-naped Crane | -6174451.329 | 5935997.247 |
| White-naped Crane | -6179752.363 | 5931978.789 |
| White-naped Crane | -6174950.04  | 5943726.176 |
| White-naped Crane | -6195900.369 | 5914487.771 |
| White-naped Crane | -6174451.329 | 5936010.302 |
| White-naped Crane | -6227116.58  | 5907980.462 |
| White-naped Crane | -6176185.687 | 5919760.348 |
| White-naped Crane | -6174440.197 | 5936010.302 |
| White-naped Crane | -6174938.908 | 5943734.343 |
| White-naped Crane | -6179747.91  | 5931975.526 |
| White-naped Crane | -6195898.142 | 5914484.515 |
| White-naped Crane | -6227116.58  | 5908008.115 |
| White-naped Crane | -6176196.819 | 5919763.606 |
| White-naped Crane | -6174446.876 | 5936002.143 |
| White-naped Crane | -6174938.908 | 5943740.876 |
| White-naped Crane | -6195900.369 | 5914484.515 |
| White-naped Crane | -6179743.458 | 5931973.895 |
| White-naped Crane | -6176190.14  | 5919765.235 |
| White-naped Crane | -6227114.354 | 5907980.462 |
| White-naped Crane | -6174941.135 | 5943732.71  |
| White-naped Crane | -6179750.137 | 5931980.42  |
| White-naped Crane | -6195911.501 | 5914478.003 |
| White-naped Crane | -6174444.65  | 5936013.566 |
| White-naped Crane | -6227105.448 | 5908004.862 |
| White-naped Crane | -6176199.045 | 5919775.008 |
| White-naped Crane | -6175132.604 | 5943642.874 |
| White-naped Crane | -6195911.501 | 5914476.376 |
| White-naped Crane | -6179750.137 | 5931985.313 |
| White-naped Crane | -6176199.045 | 5919765.235 |

|                   |              |             |
|-------------------|--------------|-------------|
| White-naped Crane | -6174442.424 | 5936007.039 |
| White-naped Crane | -6227109.901 | 5908009.742 |
| White-naped Crane | -6174458.008 | 5936029.885 |
| White-naped Crane | -6175139.284 | 5943639.608 |
| White-naped Crane | -6195911.501 | 5914479.631 |
| White-naped Crane | -6179750.137 | 5931970.633 |
| White-naped Crane | -6227105.448 | 5908012.995 |
| White-naped Crane | -6176190.14  | 5919768.492 |
| White-naped Crane | -6195902.595 | 5914491.026 |
| White-naped Crane | -6174451.329 | 5936039.677 |
| White-naped Crane | -6179714.515 | 5931985.313 |
| White-naped Crane | -6227109.901 | 5908009.742 |
| White-naped Crane | -6175148.189 | 5943636.341 |
| White-naped Crane | -6176192.366 | 5919765.235 |
| White-naped Crane | -6196581.644 | 5915259.404 |
| White-naped Crane | -6225126.188 | 5905233.536 |
| White-naped Crane | -6171557.022 | 5937203.313 |
| White-naped Crane | -6176185.687 | 5919773.379 |
| White-naped Crane | -6171418.986 | 5937071.111 |
| White-naped Crane | -6225097.245 | 5904883.93  |
| White-naped Crane | -6171450.156 | 5936999.298 |
| White-naped Crane | -6196492.588 | 5915171.493 |
| White-naped Crane | -6171755.171 | 5943484.44  |
| White-naped Crane | -6176201.272 | 5919768.492 |
| White-naped Crane | -6172452.031 | 5945065.648 |
| White-naped Crane | -6171750.718 | 5937265.335 |
| White-naped Crane | -6225157.357 | 5904787.995 |
| White-naped Crane | -6178412.077 | 5932849.867 |
| White-naped Crane | -6175838.37  | 5920700.241 |
| White-naped Crane | -6178398.718 | 5932862.917 |
| White-naped Crane | -6173852.43  | 5935696.981 |
| White-naped Crane | -6196494.815 | 5915189.401 |
| White-naped Crane | -6226629.001 | 5908460.329 |
| White-naped Crane | -6178398.718 | 5932864.549 |
| White-naped Crane | -6172535.521 | 5945367.874 |
| White-naped Crane | -6173697.696 | 5935734.514 |
| White-naped Crane | -6172576.709 | 5945465.896 |
| White-naped Crane | -6178490     | 5933039.101 |
| White-naped Crane | -6228512.527 | 5906884.189 |
| White-naped Crane | -6175818.332 | 5920718.16  |
| White-naped Crane | -6228514.753 | 5906989.907 |
| White-naped Crane | -6172605.652 | 5945470.797 |
| White-naped Crane | -6228483.584 | 5907019.183 |
| White-naped Crane | -6178238.418 | 5933270.756 |
| White-naped Crane | -6172730.33  | 5946060.585 |
| White-naped Crane | -6178080.345 | 5933107.618 |
| White-naped Crane | -6228461.32  | 5907048.459 |
| White-naped Crane | -6178033.59  | 5933107.618 |
| White-naped Crane | -6228521.432 | 5906851.661 |
| White-naped Crane | -6178454.378 | 5932614.961 |
| White-naped Crane | -6229227.198 | 5906676.011 |
| White-naped Crane | -6173162.249 | 5936543.954 |
| White-naped Crane | -6079731.801 | 5858945.227 |
| White-naped Crane | -6178398.718 | 5932867.811 |
| White-naped Crane | -6088944.602 | 5864883.262 |
| White-naped Crane | -6227873.553 | 5904755.474 |
| White-naped Crane | -6165815.163 | 6032777.297 |
| White-naped Crane | -6178469.963 | 5932696.524 |

|                   |              |             |
|-------------------|--------------|-------------|
| White-naped Crane | -6166149.122 | 6032838.363 |
| White-naped Crane | -6172349.617 | 5936405.234 |
| White-naped Crane | -6227134.391 | 5904696.938 |
| White-naped Crane | -6092324.262 | 5870208.296 |
| White-naped Crane | -6179892.626 | 5932101.126 |
| White-naped Crane | -6092916.481 | 5885297.721 |
| White-naped Crane | -6165955.426 | 6032889.527 |
| White-naped Crane | -6172175.959 | 5937484.046 |
| White-naped Crane | -6179977.229 | 5932287.082 |
| White-naped Crane | -6165964.331 | 6032897.779 |
| White-naped Crane | -6227310.276 | 5904661.166 |
| White-naped Crane | -6165991.048 | 6032879.624 |
| White-naped Crane | -6178930.825 | 5933047.258 |
| White-naped Crane | -6226384.098 | 5905066.049 |
| White-naped Crane | -6092858.595 | 5885550.813 |
| White-naped Crane | -6202305.692 | 5891674.33  |
| White-naped Crane | -6171390.043 | 5936707.157 |
| White-naped Crane | -6202305.692 | 5891687.318 |
| White-naped Crane | -6171418.986 | 5937049.894 |
| White-naped Crane | -6092802.935 | 5885591.374 |
| White-naped Crane | -6178405.397 | 5932851.498 |
| White-naped Crane | -6166137.99  | 6032820.208 |
| White-naped Crane | -6228503.621 | 5906867.925 |
| White-naped Crane | -6202316.824 | 5891716.542 |
| White-naped Crane | -6166135.763 | 6032877.974 |
| White-naped Crane | -6229189.349 | 5906651.615 |
| White-naped Crane | -6178398.718 | 5932864.549 |
| White-naped Crane | -6202321.277 | 5891714.919 |
| White-naped Crane | -6092809.615 | 5885591.374 |
| White-naped Crane | -6174270.992 | 5935985.824 |
| White-naped Crane | -6174266.539 | 5935987.456 |
| White-naped Crane | -6229189.349 | 5906651.615 |
| White-naped Crane | -6178387.586 | 5932880.862 |
| White-naped Crane | -6166122.405 | 6032846.615 |
| White-naped Crane | -6092809.615 | 5885597.863 |
| White-naped Crane | -6202296.787 | 5891706.801 |
| White-naped Crane | -6174255.407 | 5935967.873 |
| White-naped Crane | -6092811.841 | 5885596.241 |
| White-naped Crane | -6166122.405 | 6032846.615 |
| White-naped Crane | -6229198.255 | 5906648.362 |
| White-naped Crane | -6178387.586 | 5932875.968 |
| White-naped Crane | -6202316.824 | 5891701.93  |
| White-naped Crane | -6166122.405 | 6032841.664 |
| White-naped Crane | -6092809.615 | 5885589.751 |
| White-naped Crane | -6202319.05  | 5891703.554 |
| White-naped Crane | -6178387.586 | 5932875.968 |
| White-naped Crane | -6229196.028 | 5906646.736 |
| White-naped Crane | -6178385.36  | 5932882.493 |
| White-naped Crane | -6202319.05  | 5891701.93  |
| White-naped Crane | -6166120.178 | 6032848.266 |
| White-naped Crane | -6092807.388 | 5885599.486 |
| White-naped Crane | -6229191.576 | 5906658.12  |
| White-naped Crane | -6174150.766 | 5936016.83  |
| White-naped Crane | -6166124.631 | 6032849.916 |
| White-naped Crane | -6174157.446 | 5936015.198 |
| White-naped Crane | -6202321.277 | 5891703.554 |
| White-naped Crane | -6178385.36  | 5932882.493 |
| White-naped Crane | -6092807.388 | 5885602.731 |

|                   |              |             |
|-------------------|--------------|-------------|
| White-naped Crane | -6229198.255 | 5906654.868 |
| White-naped Crane | -6166106.82  | 6032856.518 |
| White-naped Crane | -6174155.219 | 5936005.407 |
| White-naped Crane | -6202316.824 | 5891708.424 |
| White-naped Crane | -6229193.802 | 5906654.868 |
| White-naped Crane | -6178383.134 | 5932871.074 |
| White-naped Crane | -6092811.841 | 5885592.996 |
| White-naped Crane | -6174150.766 | 5936016.83  |
| White-naped Crane | -6092814.067 | 5885586.506 |
| White-naped Crane | -6178389.813 | 5932872.705 |
| White-naped Crane | -6202321.277 | 5891698.683 |
| White-naped Crane | -6166102.367 | 6032851.567 |
| White-naped Crane | -6229202.707 | 5906646.736 |
| White-naped Crane | -6166100.141 | 6032849.916 |
| White-naped Crane | -6178398.718 | 5932862.917 |
| White-naped Crane | -6229209.387 | 5906679.263 |
| White-naped Crane | -6092816.294 | 5885756.862 |
| White-naped Crane | -6202310.145 | 5891710.048 |
| White-naped Crane | -6202307.919 | 5891710.048 |
| White-naped Crane | -6202305.692 | 5891711.672 |
| White-naped Crane | -6172069.092 | 5937865.987 |
| White-naped Crane | -6167921.328 | 6036859.774 |
| White-naped Crane | -6171470.193 | 5937315.932 |
| White-naped Crane | -6094599.632 | 5887502.792 |
| White-naped Crane | -6202301.239 | 5891718.166 |
| White-naped Crane | -6202301.239 | 5891716.542 |
| White-naped Crane | -6167729.858 | 6033992.096 |
| White-naped Crane | -6174760.797 | 5935289.027 |
| White-naped Crane | -6171514.721 | 5937281.656 |
| White-naped Crane | -6101806.456 | 5895076.351 |
| White-naped Crane | -6226168.138 | 5904913.199 |
| White-naped Crane | -6202303.466 | 5891716.542 |
| White-naped Crane | -6178469.963 | 5932655.742 |
| White-naped Crane | -6173899.184 | 5934846.827 |
| White-naped Crane | -6227283.559 | 5904687.182 |
| White-naped Crane | -6102953.047 | 5895279.378 |
| White-naped Crane | -6167433.748 | 6033599.248 |
| White-naped Crane | -6202285.655 | 5891740.896 |
| White-naped Crane | -6180487.072 | 5931967.371 |
| White-naped Crane | -6166356.176 | 6035106.365 |
| White-naped Crane | -6102933.009 | 5895243.645 |
| White-naped Crane | -6202301.239 | 5891693.812 |
| White-naped Crane | -6180654.051 | 5933306.647 |
| White-naped Crane | -6228009.363 | 5904869.296 |
| White-naped Crane | -6202229.995 | 5891633.741 |
| White-naped Crane | -6202223.316 | 5891636.988 |
| White-naped Crane | -6180651.825 | 5933308.278 |
| White-naped Crane | -6231006.083 | 5916654.707 |
| White-naped Crane | -6174210.879 | 5934863.144 |
| White-naped Crane | -6202218.863 | 5891638.611 |
| White-naped Crane | -6174319.972 | 5934863.144 |
| White-naped Crane | -6180647.372 | 5933305.015 |
| White-naped Crane | -6230217.941 | 5917293.006 |
| White-naped Crane | -6179155.691 | 5933541.572 |
| White-naped Crane | -6174440.197 | 5934724.451 |
| White-naped Crane | -6225782.973 | 5916830.56  |
| White-naped Crane | -6173696.583 | 5935832.426 |
| White-naped Crane | -6178260.682 | 5933164.716 |

|                   |              |             |
|-------------------|--------------|-------------|
| White-naped Crane | -6226223.798 | 5916483.741 |
| White-naped Crane | -6178233.965 | 5933138.614 |
| White-naped Crane | -6173750.016 | 5935791.629 |
| White-naped Crane | -6229202.707 | 5906684.142 |
| White-naped Crane | -6178205.022 | 5933112.512 |
| White-naped Crane | -6229187.123 | 5906680.89  |
| White-naped Crane | -6173761.148 | 5935791.629 |
| White-naped Crane | -6173761.148 | 5935793.261 |
| White-naped Crane | -6178176.079 | 5932975.479 |
| White-naped Crane | -6229298.442 | 5906744.319 |
| White-naped Crane | -6030962.732 | 6267921.149 |
| White-naped Crane | -6187164.015 | 5975618.059 |
| White-naped Crane | -6030880.355 | 6268024.667 |
| White-naped Crane | -6178245.097 | 5932946.115 |
| White-naped Crane | -6229231.651 | 5906765.462 |
| White-naped Crane | -6189955.908 | 5979771.776 |
| White-naped Crane | -6030524.133 | 6267612.299 |
| White-naped Crane | -6178142.683 | 5933133.72  |
| White-naped Crane | -6189960.361 | 5979788.179 |
| White-naped Crane | -6172075.771 | 5937877.413 |
| White-naped Crane | -6174086.201 | 5936694.101 |
| White-naped Crane | -5652084.619 | 5754143.478 |
| White-naped Crane | -6178129.325 | 5933045.627 |
| White-naped Crane | -6226257.194 | 5905018.893 |
| White-naped Crane | -6189470.555 | 5979914.478 |
| White-naped Crane | -6030987.222 | 6267936.422 |
| White-naped Crane | -6189459.423 | 5979922.68  |
| White-naped Crane | -6189461.649 | 5979916.119 |
| White-naped Crane | -6173903.637 | 5936674.516 |
| White-naped Crane | -6178418.756 | 5932854.761 |
| White-naped Crane | -6227276.88  | 5904679.052 |
| White-naped Crane | -6030964.958 | 6267914.361 |
| White-naped Crane | -5652075.713 | 5754185.03  |
| White-naped Crane | -6030969.411 | 6267910.967 |
| White-naped Crane | -6178423.209 | 5932861.286 |
| White-naped Crane | -5652069.034 | 5754197.815 |
| White-naped Crane | -6174186.389 | 5935770.415 |
| White-naped Crane | -6227279.107 | 5904679.052 |
| White-naped Crane | -6189461.649 | 5979912.838 |
| White-naped Crane | -6174197.521 | 5935758.991 |
| White-naped Crane | -6178420.982 | 5932846.604 |
| White-naped Crane | -5652069.034 | 5754191.423 |
| White-naped Crane | -6030962.732 | 6267900.785 |
| White-naped Crane | -6227292.465 | 5904649.784 |
| White-naped Crane | -6189463.876 | 5979912.838 |
| White-naped Crane | -6189468.328 | 5979911.198 |
| White-naped Crane | -6030969.411 | 6267900.785 |
| White-naped Crane | -6178416.529 | 5932846.604 |
| White-naped Crane | -6189466.102 | 5979914.478 |
| White-naped Crane | -5652062.355 | 5754197.815 |
| White-naped Crane | -6227281.333 | 5904666.044 |
| White-naped Crane | -6174190.842 | 5935754.096 |
| White-naped Crane | -6178416.529 | 5932849.867 |
| White-naped Crane | -5652062.355 | 5754196.217 |
| White-naped Crane | -6174190.842 | 5935752.464 |
| White-naped Crane | -6227281.333 | 5904664.418 |
| White-naped Crane | -6174193.068 | 5935752.464 |
| White-naped Crane | -6178416.529 | 5932853.129 |

|                   |              |             |
|-------------------|--------------|-------------|
| White-naped Crane | -5652062.355 | 5754188.226 |
| White-naped Crane | -6227281.333 | 5904667.67  |
| White-naped Crane | -6030973.864 | 6267910.967 |
| White-naped Crane | -6174195.294 | 5935757.36  |
| White-naped Crane | -6178423.209 | 5932856.392 |
| White-naped Crane | -6227299.144 | 5904661.166 |
| White-naped Crane | -5652060.128 | 5754188.226 |
| White-naped Crane | -6178420.982 | 5932849.867 |
| White-naped Crane | -6227299.144 | 5904661.166 |
| White-naped Crane | -5652066.807 | 5754188.226 |
| White-naped Crane | -6030962.732 | 6267893.997 |
| White-naped Crane | -6189470.555 | 5979904.637 |
| White-naped Crane | -6189475.008 | 5979906.277 |
| White-naped Crane | -6178329.7   | 5932875.968 |
| White-naped Crane | -5651968.846 | 5754010.834 |
| White-naped Crane | -6174168.578 | 5935762.255 |
| White-naped Crane | -6189301.349 | 5979944.003 |
| White-naped Crane | -6189301.349 | 5979944.003 |
| White-naped Crane | -6030960.505 | 6267899.088 |
| White-naped Crane | -6172044.602 | 5937861.09  |
| White-naped Crane | -6170895.785 | 5936550.482 |
| White-naped Crane | -5652044.544 | 5753994.853 |
| White-naped Crane | -6189312.481 | 5979950.564 |
| White-naped Crane | -6189312.481 | 5979942.363 |
| White-naped Crane | -6172147.016 | 5937771.316 |
| White-naped Crane | -6170929.18  | 5936522.738 |
| White-naped Crane | -5652075.713 | 5753945.311 |
| White-naped Crane | -6226493.191 | 5905041.657 |
| White-naped Crane | -6030922.657 | 6267900.785 |
| White-naped Crane | -6189310.255 | 5979948.924 |
| White-naped Crane | -6189312.481 | 5979955.485 |
| White-naped Crane | -6170906.917 | 5936568.435 |
| White-naped Crane | -6030951.6   | 6267936.422 |
| White-naped Crane | -5652080.166 | 5753953.302 |
| White-naped Crane | -6227288.012 | 5904685.556 |
| White-naped Crane | -6174400.122 | 5935088.321 |
| White-naped Crane | -6189314.708 | 5979950.564 |
| White-naped Crane | -6030708.923 | 6268718.782 |
| White-naped Crane | -6175288.452 | 5932988.53  |
| White-naped Crane | -6178841.77  | 5932889.018 |
| White-naped Crane | -6227310.276 | 5904770.108 |
| White-naped Crane | -5652057.902 | 5754205.806 |
| White-naped Crane | -6227893.59  | 5904726.206 |
| White-naped Crane | -6189301.349 | 5979968.607 |
| White-naped Crane | -6228223.096 | 5904935.964 |
| White-naped Crane | -6178781.657 | 5932900.438 |
| White-naped Crane | -6006634.97  | 6256111.51  |
| White-naped Crane | -6189236.784 | 5979983.37  |
| White-naped Crane | -6178701.507 | 5932954.271 |
| White-naped Crane | -6006697.309 | 6256113.205 |
| White-naped Crane | -6189274.633 | 5979968.607 |
| White-naped Crane | -6173442.775 | 5947029.494 |
| White-naped Crane | -6178536.754 | 5932818.872 |
| White-naped Crane | -6189274.633 | 5979965.327 |
| White-naped Crane | -6227283.559 | 5904687.182 |
| White-naped Crane | -6178478.868 | 5932766.67  |
| White-naped Crane | -6174466.914 | 5936085.371 |
| White-naped Crane | -6189497.271 | 5979922.68  |

|                   |              |             |
|-------------------|--------------|-------------|
| White-naped Crane | -6008262.461 | 6256760.573 |
| White-naped Crane | -6173950.391 | 5935710.036 |
| White-naped Crane | -6178607.999 | 5932851.498 |
| White-naped Crane | -6227167.787 | 5904513.201 |
| White-naped Crane | -6189381.499 | 5980096.55  |
| White-naped Crane | -6178659.206 | 5932952.64  |
| White-naped Crane | -5332285.985 | 5591244.141 |
| White-naped Crane | -6174070.616 | 5935600.702 |
| White-naped Crane | -6227118.807 | 5904518.079 |
| White-naped Crane | -6189421.574 | 5980042.42  |
| White-naped Crane | -6030312.626 | 6269665.858 |
| White-naped Crane | -6227132.165 | 5904628.646 |
| White-naped Crane | -6178705.96  | 5932753.62  |
| White-naped Crane | -6174028.315 | 5935718.195 |
| White-naped Crane | -5332279.306 | 5591247.279 |
| White-naped Crane | -6189439.385 | 5979870.191 |
| White-naped Crane | -6178868.487 | 5932548.079 |
| White-naped Crane | -6029597.955 | 6267495.21  |
| White-naped Crane | -6189434.933 | 5979875.112 |
| White-naped Crane | -6227158.882 | 5904640.028 |
| White-naped Crane | -5332653.34  | 5591211.193 |
| White-naped Crane | -6179271.463 | 5932632.905 |
| White-naped Crane | -6029613.54  | 6267493.513 |
| White-naped Crane | -6226468.701 | 5904443.285 |
| White-naped Crane | -6172158.148 | 5937888.839 |
| White-naped Crane | -6187393.333 | 5976226.315 |
| White-naped Crane | -6189089.842 | 5979834.106 |
| White-naped Crane | -6031955.702 | 6265706.843 |
| White-naped Crane | -6174010.504 | 5935546.852 |
| White-naped Crane | -5332272.627 | 5591241.003 |
| White-naped Crane | -6178607.999 | 5933396.374 |
| White-naped Crane | -6226824.923 | 5904358.736 |
| White-naped Crane | -6189114.332 | 5979817.703 |
| White-naped Crane | -6188822.675 | 5979309.242 |
| White-naped Crane | -6174504.762 | 5935430.993 |
| White-naped Crane | -6032518.978 | 6264777.179 |
| White-naped Crane | -5332263.722 | 5591278.659 |
| White-naped Crane | -6226831.602 | 5904365.24  |
| White-naped Crane | -6178407.624 | 5932864.549 |
| White-naped Crane | -6188811.543 | 5979266.598 |
| White-naped Crane | -6032516.752 | 6264782.269 |
| White-naped Crane | -6174551.517 | 5935424.466 |
| White-naped Crane | -5332263.722 | 5591278.659 |
| White-naped Crane | -6178407.624 | 5932862.917 |
| White-naped Crane | -6188811.543 | 5979266.598 |
| White-naped Crane | -6226827.15  | 5904355.484 |
| White-naped Crane | -6178400.945 | 5932862.917 |
| White-naped Crane | -6032400.98  | 6264750.038 |
| White-naped Crane | -5332263.722 | 5591272.383 |
| White-naped Crane | -6188822.675 | 5979255.117 |
| White-naped Crane | -6226831.602 | 5904352.232 |
| White-naped Crane | -6174547.064 | 5935395.093 |
| White-naped Crane | -6032525.658 | 6264775.483 |
| White-naped Crane | -6174533.706 | 5935396.725 |
| White-naped Crane | -5332263.722 | 5591273.952 |
| White-naped Crane | -6178398.718 | 5932864.549 |
| White-naped Crane | -6226824.923 | 5904350.606 |
| White-naped Crane | -6188780.374 | 5979227.235 |

|                   |              |             |
|-------------------|--------------|-------------|
| White-naped Crane | -6178396.492 | 5932867.811 |
| White-naped Crane | -5332259.269 | 5591275.521 |
| White-naped Crane | -6032521.205 | 6264772.09  |
| White-naped Crane | -6188809.317 | 5979271.518 |
| White-naped Crane | -6174538.158 | 5935399.989 |
| White-naped Crane | -6226824.923 | 5904348.98  |
| White-naped Crane | -6034142.017 | 6263184.437 |
| White-naped Crane | -6174542.611 | 5935399.989 |
| White-naped Crane | -6178400.945 | 5932862.917 |
| White-naped Crane | -6226827.15  | 5904357.11  |
| White-naped Crane | -5332259.269 | 5591270.814 |
| White-naped Crane | -6188800.411 | 5979268.238 |
| White-naped Crane | -6034139.79  | 6263196.31  |
| White-naped Crane | -6174544.837 | 5935399.989 |
| White-naped Crane | -6178392.039 | 5932859.655 |
| White-naped Crane | -6226829.376 | 5904353.858 |
| White-naped Crane | -5332257.042 | 5591286.505 |
| White-naped Crane | -6188820.449 | 5979264.958 |
| White-naped Crane | -6178394.265 | 5932856.392 |
| White-naped Crane | -6226829.376 | 5904345.728 |
| White-naped Crane | -6034135.337 | 6263177.653 |
| White-naped Crane | -5332243.684 | 5591256.693 |
| White-naped Crane | -6188811.543 | 5979256.757 |
| White-naped Crane | -6174538.158 | 5935399.989 |
| White-naped Crane | -6178467.736 | 5932879.23  |
| White-naped Crane | -6174535.932 | 5935398.357 |
| White-naped Crane | -6226831.602 | 5904358.736 |
| White-naped Crane | -6031412.463 | 6266288.784 |
| White-naped Crane | -5332297.117 | 5591273.952 |
| White-naped Crane | -6032069.248 | 6265191.105 |
| White-naped Crane | -6172082.45  | 5937888.839 |
| White-naped Crane | -6178380.907 | 5932672.055 |
| White-naped Crane | -5332308.249 | 5591253.555 |
| White-naped Crane | -6172334.032 | 5937730.51  |
| White-naped Crane | -6032075.927 | 6265208.069 |
| White-naped Crane | -6228521.432 | 5907033.821 |
| White-naped Crane | -6178944.184 | 5932174.529 |
| White-naped Crane | -6030310.4   | 6267673.389 |
| White-naped Crane | -6228519.206 | 5907015.93  |
| White-naped Crane | -5332103.421 | 5589560.764 |
| White-naped Crane | -6190082.812 | 5979697.966 |
| White-naped Crane | -6178445.472 | 5932610.067 |
| White-naped Crane | -6228530.338 | 5906876.057 |
| White-naped Crane | -5332107.874 | 5589519.978 |
| White-naped Crane | -6173999.372 | 5934766.874 |
| White-naped Crane | -6189617.497 | 5980037.499 |
| White-naped Crane | -6178944.184 | 5932203.89  |
| White-naped Crane | -6229391.951 | 5908191.926 |
| White-naped Crane | -6174435.744 | 5934530.285 |
| White-naped Crane | -5332497.492 | 5592640.66  |
| White-naped Crane | -6189619.723 | 5980004.693 |
| White-naped Crane | -6178915.241 | 5932159.848 |
| White-naped Crane | -5334116.078 | 5594500.408 |
| White-naped Crane | -6228441.282 | 5906934.608 |
| White-naped Crane | -6173493.982 | 5931730.858 |
| White-naped Crane | -5976629.915 | 6356503.891 |
| White-naped Crane | -5332312.702 | 5594324.618 |
| White-naped Crane | -6227212.315 | 5903495.405 |



|                   |              |             |
|-------------------|--------------|-------------|
| White-naped Crane | -6173465.038 | 5931659.089 |
| White-naped Crane | -6189989.304 | 5979958.766 |
| White-naped Crane | -5976623.236 | 6356533.049 |
| White-naped Crane | -6173013.081 | 5930737.573 |
| White-naped Crane | -6178242.871 | 5932791.14  |
| White-naped Crane | -5332390.626 | 5594324.618 |
| White-naped Crane | -6227207.862 | 5903396.233 |
| White-naped Crane | -6189991.53  | 5979955.485 |
| White-naped Crane | -5332390.626 | 5594324.618 |
| White-naped Crane | -6189993.756 | 5979957.125 |
| White-naped Crane | -6227058.694 | 5904787.995 |
| White-naped Crane | -5976641.047 | 6356503.891 |
| White-naped Crane | -6173004.176 | 5930641.35  |
| White-naped Crane | -5976614.33  | 6356509.037 |
| White-naped Crane | -6173021.987 | 5930607.101 |
| White-naped Crane | -6178955.316 | 5932189.21  |
| White-naped Crane | -5332370.588 | 5594566.33  |
| White-naped Crane | -6178937.505 | 5932203.89  |
| White-naped Crane | -6172910.667 | 5930559.805 |
| White-naped Crane | -6229988.623 | 5909501.487 |
| White-naped Crane | -5332388.399 | 5594561.622 |
| White-naped Crane | -5976634.368 | 6356459.297 |
| White-naped Crane | -5976634.368 | 6356557.061 |
| White-naped Crane | -6173015.308 | 5930636.457 |
| White-naped Crane | -6180055.152 | 5931264.375 |
| White-naped Crane | -6228461.32  | 5907014.303 |
| White-naped Crane | -5333855.59  | 5590268.277 |
| White-naped Crane | -6189889.116 | 5979883.313 |
| White-naped Crane | -5978818.456 | 6351128.613 |
| White-naped Crane | -6179329.349 | 5931859.716 |
| White-naped Crane | -6189831.23  | 5979857.069 |
| White-naped Crane | -5333811.062 | 5590189.836 |
| White-naped Crane | -6173010.855 | 5930662.551 |
| White-naped Crane | -6171888.754 | 5937612.99  |
| White-naped Crane | -6179358.292 | 5931884.183 |
| White-naped Crane | -5333935.74  | 5590070.607 |
| White-naped Crane | -6228301.02  | 5907027.315 |
| White-naped Crane | -5978992.114 | 6350881.794 |
| White-naped Crane | -6189216.746 | 5979986.65  |
| White-naped Crane | -6179367.198 | 5931889.076 |
| White-naped Crane | -6228223.096 | 5906919.97  |
| White-naped Crane | -6189218.973 | 5979980.089 |
| White-naped Crane | -6174386.764 | 5946357.945 |
| White-naped Crane | -6189241.237 | 5979981.729 |
| White-naped Crane | -5978983.209 | 6349500.428 |
| White-naped Crane | -6173237.947 | 5946202.729 |
| White-naped Crane | -6179153.464 | 5931986.944 |
| White-naped Crane | -6189236.784 | 5979975.168 |
| White-naped Crane | -5332259.269 | 5591294.35  |
| White-naped Crane | -6228256.492 | 5906970.39  |
| White-naped Crane | -6189243.463 | 5979996.492 |
| White-naped Crane | -5978994.341 | 6349497     |
| White-naped Crane | -6173226.815 | 5946189.658 |
| White-naped Crane | -6228249.813 | 5906970.39  |
| White-naped Crane | -5332261.495 | 5591294.35  |
| White-naped Crane | -6179160.144 | 5931988.576 |
| White-naped Crane | -6189270.18  | 5980060.463 |
| White-naped Crane | -5978985.435 | 6349507.283 |

|                   |              |             |
|-------------------|--------------|-------------|
| White-naped Crane | -5332263.722 | 5591284.936 |
| White-naped Crane | -6179157.917 | 5931985.313 |
| White-naped Crane | -6228252.039 | 5906973.642 |
| White-naped Crane | -6173229.041 | 5946192.926 |
| White-naped Crane | -6189214.52  | 5979945.643 |
| White-naped Crane | -6173286.927 | 5945926.613 |
| White-naped Crane | -5332254.816 | 5591286.505 |
| White-naped Crane | -6179153.464 | 5931985.313 |
| White-naped Crane | -6228252.039 | 5906965.51  |
| White-naped Crane | -6173291.38  | 5945944.585 |
| White-naped Crane | -5332245.91  | 5591278.659 |
| White-naped Crane | -6179142.332 | 5931986.944 |
| White-naped Crane | -5978963.171 | 6349507.283 |
| White-naped Crane | -6228247.586 | 5906970.39  |
| White-naped Crane | -6179153.464 | 5932003.256 |
| White-naped Crane | -5332250.363 | 5591270.814 |
| White-naped Crane | -5978978.756 | 6349507.283 |
| White-naped Crane | -6173280.248 | 5945938.05  |
| White-naped Crane | -6228252.039 | 5906965.51  |
| White-naped Crane | -5978978.756 | 6349503.855 |
| White-naped Crane | -6173286.927 | 5945931.515 |
| White-naped Crane | -6228252.039 | 5906962.257 |
| White-naped Crane | -6179164.596 | 5931986.944 |
| White-naped Crane | -6179169.049 | 5931980.42  |
| White-naped Crane | -5332254.816 | 5591269.245 |
| White-naped Crane | -5978978.756 | 6349500.428 |
| White-naped Crane | -6228203.058 | 5906975.269 |
| White-naped Crane | -6173280.248 | 5945910.275 |
| White-naped Crane | -5978905.285 | 6349503.855 |
| White-naped Crane | -6171637.172 | 5944769.966 |
| White-naped Crane | -6179017.655 | 5931903.756 |
| White-naped Crane | -5332936.091 | 5589347.423 |
| White-naped Crane | -6228209.738 | 5907001.292 |
| White-naped Crane | -5978938.681 | 6349524.42  |
| White-naped Crane | -6171692.832 | 5937454.666 |
| White-naped Crane | -5332858.168 | 5589331.736 |
| White-naped Crane | -6189960.361 | 5979804.581 |
| White-naped Crane | -6190031.605 | 5979812.782 |
| White-naped Crane | -6171583.739 | 5937374.689 |
| White-naped Crane | -6190047.19  | 5979804.581 |
| White-naped Crane | -5979001.02  | 6349526.134 |
| White-naped Crane | -5332851.488 | 5589578.02  |
| White-naped Crane | -6226361.834 | 5905001.006 |
| White-naped Crane | -6178877.392 | 5932923.276 |
| White-naped Crane | -6172690.255 | 5945204.507 |
| White-naped Crane | -5332871.526 | 5589272.127 |
| White-naped Crane | -6178340.832 | 5933456.737 |
| White-naped Crane | -5332241.458 | 5591088.812 |
| White-naped Crane | -5978983.209 | 6349464.44  |
| White-naped Crane | -6173756.696 | 5936119.641 |
| White-naped Crane | -6178337.493 | 5933402.9   |
| White-naped Crane | -5979479.694 | 6347687.52  |
| White-naped Crane | -6173880.26  | 5935718.195 |
| White-naped Crane | -6178913.014 | 5932112.544 |
| White-naped Crane | -5332624.397 | 5589491.741 |
| White-naped Crane | -6229178.217 | 5906879.31  |
| White-naped Crane | -6189196.709 | 5979962.046 |
| White-naped Crane | -6229148.161 | 5906900.453 |

|                   |              |             |
|-------------------|--------------|-------------|
| White-naped Crane | -6189236.784 | 5979942.363 |
| White-naped Crane | -6178786.11  | 5931556.331 |
| White-naped Crane | -6229084.709 | 5906879.31  |
| White-naped Crane | -5332628.849 | 5589510.566 |
| White-naped Crane | -6173931.467 | 5935458.733 |
| White-naped Crane | -6178516.717 | 5931799.364 |
| White-naped Crane | -6229246.122 | 5906728.055 |
| White-naped Crane | -5330113.029 | 5585555.194 |
| White-naped Crane | -6189245.689 | 5979937.442 |
| White-naped Crane | -6172959.648 | 5930603.839 |
| White-naped Crane | -6178915.241 | 5932146.799 |
| White-naped Crane | -5329905.975 | 5585167.906 |
| White-naped Crane | -5845121.521 | 6333171.116 |
| White-naped Crane | -6189234.558 | 5979930.881 |
| White-naped Crane | -6229312.914 | 5906734.56  |
| White-naped Crane | -6178955.316 | 5932145.168 |
| White-naped Crane | -5845219.482 | 6333183.088 |
| White-naped Crane | -6189243.463 | 5979922.68  |
| White-naped Crane | -5330044.011 | 5585442.299 |
| White-naped Crane | -6229216.066 | 5906689.022 |
| White-naped Crane | -6172932.931 | 5930395.088 |
| White-naped Crane | -5845003.523 | 6333270.316 |
| White-naped Crane | -6172966.327 | 5930417.92  |
| White-naped Crane | -6178916.354 | 5932130.487 |
| White-naped Crane | -6229206.047 | 5906906.959 |
| White-naped Crane | -5330155.33  | 5585563.034 |
| White-naped Crane | -6189203.388 | 5979950.564 |
| White-naped Crane | -5845190.539 | 6333222.426 |
| White-naped Crane | -5330050.69  | 5585363.9   |
| White-naped Crane | -6172980.799 | 5930660.92  |
| White-naped Crane | -6178938.618 | 5932197.366 |
| White-naped Crane | -6189210.067 | 5979947.284 |
| White-naped Crane | -6178963.108 | 5932213.677 |
| White-naped Crane | -5845181.634 | 6333215.585 |
| White-naped Crane | -5329892.616 | 5584978.189 |
| White-naped Crane | -6228083.947 | 5907030.568 |
| White-naped Crane | -6173028.666 | 5930625.041 |
| White-naped Crane | -6172224.939 | 5937825.181 |
| White-naped Crane | -5330411.365 | 5584854.325 |
| White-naped Crane | -6178354.19  | 5932619.854 |
| White-naped Crane | -6228305.472 | 5907040.326 |
| White-naped Crane | -6189962.587 | 5980012.895 |
| White-naped Crane | -6172100.261 | 5937968.82  |
| White-naped Crane | -6178372.002 | 5932579.073 |
| White-naped Crane | -6228464.659 | 5906872.804 |
| White-naped Crane | -5330587.25  | 5585425.051 |
| White-naped Crane | -5841118.472 | 6327742.541 |
| White-naped Crane | -5841988.991 | 6321465.201 |
| White-naped Crane | -6178366.436 | 5932642.692 |
| White-naped Crane | -5330939.02  | 5585426.619 |
| White-naped Crane | -6228194.153 | 5906937.861 |
| White-naped Crane | -6173913.656 | 5936225.718 |
| White-naped Crane | -6188054.571 | 5977178.952 |
| White-naped Crane | -6173934.807 | 5936225.718 |
| White-naped Crane | -6188054.571 | 5977175.673 |
| White-naped Crane | -6228210.851 | 5906911.838 |
| White-naped Crane | -6178366.436 | 5932649.217 |
| White-naped Crane | -5330932.34  | 5585410.939 |

|                   |              |             |
|-------------------|--------------|-------------|
| White-naped Crane | -6173914.769 | 5936212.662 |
| White-naped Crane | -5330945.699 | 5585421.915 |
| White-naped Crane | -5842211.63  | 6329865.675 |
| White-naped Crane | -6188047.892 | 5977164.195 |
| White-naped Crane | -6178366.436 | 5932647.586 |
| White-naped Crane | -6228216.417 | 5906913.465 |
| White-naped Crane | -6173921.448 | 5936207.766 |
| White-naped Crane | -6188052.345 | 5977169.114 |
| White-naped Crane | -5330947.925 | 5585407.803 |
| White-naped Crane | -6228209.738 | 5906924.85  |
| White-naped Crane | -6178363.096 | 5932645.955 |
| White-naped Crane | -5842162.649 | 6329886.191 |
| White-naped Crane | -6173924.788 | 5936204.502 |
| White-naped Crane | -5330950.152 | 5585401.531 |
| White-naped Crane | -6188054.571 | 5977167.474 |
| White-naped Crane | -6178364.209 | 5932645.955 |
| White-naped Crane | -5842209.403 | 6329870.804 |
| White-naped Crane | -6228211.964 | 5906924.85  |
| White-naped Crane | -5842220.535 | 6329865.675 |
| White-naped Crane | -6173924.788 | 5936207.766 |
| White-naped Crane | -5330947.925 | 5585406.235 |
| White-naped Crane | -6178365.322 | 5932645.955 |
| White-naped Crane | -6228209.738 | 5906928.102 |
| White-naped Crane | -6173927.014 | 5936209.398 |
| White-naped Crane | -5842191.592 | 6329874.223 |
| White-naped Crane | -5330950.152 | 5585407.803 |
| White-naped Crane | -6228228.662 | 5906981.775 |
| White-naped Crane | -6178365.322 | 5932634.536 |
| White-naped Crane | -6228249.813 | 5906965.51  |
| White-naped Crane | -5330950.152 | 5585406.235 |
| White-naped Crane | -5842193.819 | 6329872.513 |
| White-naped Crane | -6173910.316 | 5936201.238 |
| White-naped Crane | -6178363.096 | 5932654.111 |
| White-naped Crane | -5842200.498 | 6329874.223 |
| White-naped Crane | -5330950.152 | 5585403.099 |
| White-naped Crane | -6228256.492 | 5906970.39  |
| White-naped Crane | -6178363.096 | 5932649.217 |
| White-naped Crane | -6173921.448 | 5936211.03  |
| White-naped Crane | -6173923.675 | 5936212.662 |
| White-naped Crane | -6178361.983 | 5932645.955 |
| White-naped Crane | -5330954.604 | 5585530.106 |
| White-naped Crane | -6228206.398 | 5907033.821 |
| White-naped Crane | -5842196.045 | 6329874.223 |
| White-naped Crane | -5842383.062 | 6329745.999 |
| White-naped Crane | -6173924.788 | 5936214.294 |
| White-naped Crane | -6227963.722 | 5907100.505 |
| White-naped Crane | -6178321.908 | 5932900.438 |
| White-naped Crane | -5331079.282 | 5585537.946 |
| White-naped Crane | -5842567.852 | 6329453.655 |
| White-naped Crane | -6177991.289 | 5932773.195 |
| White-naped Crane | -6172012.319 | 5937921.484 |
| White-naped Crane | -5331010.264 | 5585552.058 |
| White-naped Crane | -6228020.494 | 5907123.275 |
| White-naped Crane | -6171990.055 | 5937905.161 |
| White-naped Crane | -6174626.101 | 5934416.071 |
| White-naped Crane | -6228304.359 | 5907048.459 |
| White-naped Crane | -5843244.675 | 6322006.636 |
| White-naped Crane | -6171666.115 | 5937430.183 |

|                   |              |             |
|-------------------|--------------|-------------|
| White-naped Crane | -6172071.318 | 5937784.374 |
| White-naped Crane | -6228467.999 | 5906882.563 |
| White-naped Crane | -5332179.119 | 5587896.525 |
| White-naped Crane | -6172066.866 | 5937777.845 |
| White-naped Crane | -5868360.578 | 6317065.003 |
| White-naped Crane | -6228441.282 | 5906929.729 |
| White-naped Crane | -6171682.813 | 5937549.334 |
| White-naped Crane | -5332377.267 | 5587858.883 |
| White-naped Crane | -6171652.757 | 5937554.23  |
| White-naped Crane | -5330023.973 | 5584982.892 |
| White-naped Crane | -6228441.282 | 5906945.993 |
| White-naped Crane | -5868355.012 | 6317054.761 |
| White-naped Crane | -5332800.281 | 5587515.409 |
| White-naped Crane | -6172052.394 | 5937413.862 |
| White-naped Crane | -6171656.097 | 5937544.437 |
| White-naped Crane | -6228440.169 | 5906928.102 |
| White-naped Crane | -5868349.446 | 6317076.952 |
| White-naped Crane | -6172212.694 | 5937627.68  |
| White-naped Crane | -5332775.791 | 5587455.812 |
| White-naped Crane | -6228505.847 | 5906893.948 |
| White-naped Crane | -5868344.993 | 6317056.468 |
| White-naped Crane | -6172133.657 | 5937727.246 |
| White-naped Crane | -5868349.446 | 6317044.518 |
| White-naped Crane | -6178363.096 | 5932642.692 |
| White-naped Crane | -5332715.679 | 5587407.194 |
| White-naped Crane | -6172247.203 | 5937544.437 |
| White-naped Crane | -6178359.756 | 5932645.955 |
| White-naped Crane | -5868105.656 | 6317117.921 |
| White-naped Crane | -5332833.677 | 5587397.784 |
| White-naped Crane | -6229168.198 | 5906841.902 |
| White-naped Crane | -6172404.164 | 5937072.743 |
| White-naped Crane | -5332742.395 | 5587142.151 |
| White-naped Crane | -6178358.643 | 5932647.586 |
| White-naped Crane | -5868332.748 | 6317068.417 |
| White-naped Crane | -6229180.444 | 5906877.684 |
| White-naped Crane | -5868349.446 | 6317070.124 |
| White-naped Crane | -6178355.304 | 5932621.486 |
| White-naped Crane | -5332241.458 | 5591241.003 |
| White-naped Crane | -6172355.183 | 5936994.402 |
| White-naped Crane | -6229178.217 | 5906843.529 |
| White-naped Crane | -5868332.748 | 6317056.468 |
| White-naped Crane | -6171855.359 | 5937723.981 |
| White-naped Crane | -6228211.964 | 5906926.476 |
| White-naped Crane | -6178431.001 | 5932768.301 |
| White-naped Crane | -5332330.513 | 5591269.245 |
| White-naped Crane | -6172528.842 | 5937040.101 |
| White-naped Crane | -6178366.436 | 5932637.798 |
| White-naped Crane | -6228483.584 | 5906893.948 |
| White-naped Crane | -5332201.383 | 5589576.451 |
| White-naped Crane | -5868872.648 | 6318056.851 |
| White-naped Crane | -5868338.314 | 6317071.831 |
| White-naped Crane | -5332250.363 | 5591248.848 |
| White-naped Crane | -6228482.47  | 5906835.397 |
| White-naped Crane | -6178377.568 | 5932644.324 |
| White-naped Crane | -6173849.091 | 5936579.859 |
| White-naped Crane | -6174437.971 | 5936256.725 |
| White-naped Crane | -5868357.238 | 6317097.437 |
| White-naped Crane | -6178366.436 | 5932647.586 |

|                   |              |             |
|-------------------|--------------|-------------|
| White-naped Crane | -5332245.91  | 5591248.848 |
| White-naped Crane | -6228553.715 | 5907035.447 |
| White-naped Crane | -6228553.715 | 5907033.821 |
| White-naped Crane | -5332237.005 | 5591261.4   |
| White-naped Crane | -6178365.322 | 5932639.43  |
| White-naped Crane | -5868353.899 | 6317095.73  |
| White-naped Crane | -5868362.804 | 6317073.538 |
| White-naped Crane | -6174372.292 | 5936446.034 |
| White-naped Crane | -5332234.778 | 5591258.262 |
| White-naped Crane | -6178364.209 | 5932644.324 |
| White-naped Crane | -6228550.375 | 5907030.568 |
| White-naped Crane | -5868361.691 | 6317105.972 |
| White-naped Crane | -6174367.84  | 5936457.458 |
| White-naped Crane | -6178365.322 | 5932644.324 |
| White-naped Crane | -6228553.715 | 5907040.326 |
| White-naped Crane | -5330939.02  | 5585415.643 |
| White-naped Crane | -6174368.953 | 5936462.354 |
| White-naped Crane | -6178359.756 | 5932647.586 |
| White-naped Crane | -6228519.206 | 5906916.718 |
| White-naped Crane | -5330936.793 | 5585420.347 |
| White-naped Crane | -5868341.654 | 6317095.73  |
| White-naped Crane | -5868337.201 | 6317097.437 |
| White-naped Crane | -6178361.983 | 5932642.692 |
| White-naped Crane | -6174375.632 | 5936454.194 |
| White-naped Crane | -5330939.02  | 5585415.643 |
| White-naped Crane | -6228522.545 | 5906913.465 |
| White-naped Crane | -6178361.983 | 5932639.43  |
| White-naped Crane | -5330943.472 | 5585417.211 |
| White-naped Crane | -6174371.179 | 5936457.458 |
| White-naped Crane | -5868352.786 | 6317097.437 |
| White-naped Crane | -6228519.206 | 5906905.333 |
| White-naped Crane | -6174364.5   | 5936459.09  |
| White-naped Crane | -6178361.983 | 5932641.061 |
| White-naped Crane | -5330943.472 | 5585412.507 |
| White-naped Crane | -6228515.866 | 5906908.585 |
| White-naped Crane | -6174302.161 | 5936398.706 |
| White-naped Crane | -6178364.209 | 5932662.268 |
| White-naped Crane | -5332468.549 | 5587233.112 |
| White-naped Crane | -5868367.257 | 6317073.538 |
| White-naped Crane | -6228467.999 | 5906931.355 |
| White-naped Crane | -5868468.558 | 6317053.054 |
| White-naped Crane | -6171686.153 | 5937652.163 |
| White-naped Crane | -6178363.096 | 5932637.798 |
| White-naped Crane | -5332490.813 | 5587231.543 |
| White-naped Crane | -6228442.395 | 5906911.838 |
| White-naped Crane | -5869326.831 | 6316894.301 |
| White-naped Crane | -6172527.728 | 5937028.676 |
| White-naped Crane | -6228455.754 | 5907097.252 |
| White-naped Crane | -5329819.146 | 5585992.677 |
| White-naped Crane | -6178549     | 5932761.776 |
| White-naped Crane | -5329848.089 | 5584750.846 |
| White-naped Crane | -6172547.766 | 5937066.215 |
| White-naped Crane | -6228519.206 | 5907102.132 |
| White-naped Crane | -5879574.904 | 6312827.508 |
| White-naped Crane | -6178476.642 | 5932913.488 |
| White-naped Crane | -6173578.584 | 5936153.912 |
| White-naped Crane | -6228362.245 | 5907113.517 |
| White-naped Crane | -6189495.045 | 5980275.344 |

|                   |              |             |
|-------------------|--------------|-------------|
| White-naped Crane | -5879873.24  | 6313184.104 |
| White-naped Crane | -6173056.496 | 5934174.596 |
| White-naped Crane | -6227993.778 | 5907090.746 |
| White-naped Crane | -6178438.793 | 5932562.76  |
| White-naped Crane | -5332657.793 | 5587694.202 |
| White-naped Crane | -6178358.643 | 5932637.798 |
| White-naped Crane | -5880384.196 | 6312991.301 |
| White-naped Crane | -6173940.373 | 5934381.807 |
| White-naped Crane | -6227574.103 | 5907606.348 |
| White-naped Crane | -5332660.019 | 5587694.202 |
| White-naped Crane | -5332715.679 | 5588197.665 |
| White-naped Crane | -6173935.92  | 5934386.702 |
| White-naped Crane | -5879833.165 | 6313250.648 |
| White-naped Crane | -6227575.217 | 5907638.879 |
| White-naped Crane | -6178364.209 | 5932642.692 |
| White-naped Crane | -5880024.634 | 6313097.087 |
| White-naped Crane | -5332708.999 | 5588029.841 |
| White-naped Crane | -6173981.561 | 5934438.914 |
| White-naped Crane | -6227756.667 | 5907669.783 |
| White-naped Crane | -6172482.087 | 5937020.516 |
| White-naped Crane | -6178176.079 | 5932840.079 |
| White-naped Crane | -6228494.716 | 5907001.292 |
| White-naped Crane | -5880405.347 | 6312940.115 |
| White-naped Crane | -5332234.778 | 5591262.969 |
| White-naped Crane | -6178360.87  | 5932647.586 |
| White-naped Crane | -5332248.137 | 5591281.797 |
| White-naped Crane | -6172459.823 | 5937043.365 |
| White-naped Crane | -6174023.862 | 5935316.767 |
| White-naped Crane | -6178351.964 | 5932675.318 |
| White-naped Crane | -5874293.907 | 6283306.826 |
| White-naped Crane | -5332228.099 | 5591226.882 |
| White-naped Crane | -6177842.121 | 5932546.448 |
| White-naped Crane | -6174080.635 | 5935383.671 |
| White-naped Crane | -5874257.171 | 6283281.324 |
| White-naped Crane | -6228840.919 | 5906568.67  |
| White-naped Crane | -6174010.504 | 5933743.873 |
| White-naped Crane | -6178364.209 | 5932639.43  |
| White-naped Crane | -6229223.858 | 5906732.934 |
| White-naped Crane | -5874741.411 | 6282458.5   |
| White-naped Crane | -5332330.513 | 5589584.295 |
| White-naped Crane | -6171892.094 | 5937774.581 |
| White-naped Crane | -6229167.085 | 5906726.428 |
| White-naped Crane | -5872048.593 | 6254249.334 |
| White-naped Crane | -5330313.404 | 5585053.448 |
| White-naped Crane | -5330478.157 | 5585075.399 |
| White-naped Crane | -6178562.358 | 5933102.724 |
| White-naped Crane | -6173975.995 | 5935943.394 |
| White-naped Crane | -6174252.067 | 5935998.879 |
| White-naped Crane | -5330544.949 | 5585141.251 |
| White-naped Crane | -6229192.689 | 5906659.747 |
| White-naped Crane | -6178364.209 | 5932645.955 |
| White-naped Crane | -6178367.549 | 5932641.061 |
| White-naped Crane | -6229160.406 | 5906724.802 |
| White-naped Crane | -5330558.307 | 5585127.14  |
| White-naped Crane | -5870653.76  | 6249804.831 |
| White-naped Crane | -6178365.322 | 5932641.061 |
| White-naped Crane | -6229248.348 | 5906854.914 |
| White-naped Crane | -5330549.401 | 5585139.684 |

|                   |              |             |
|-------------------|--------------|-------------|
| White-naped Crane | -6174265.426 | 5935997.247 |
| White-naped Crane | -6174262.086 | 5936010.302 |
| White-naped Crane | -6178368.662 | 5932655.742 |
| White-naped Crane | -5870659.326 | 6249799.751 |
| White-naped Crane | -5330562.76  | 5585128.708 |
| White-naped Crane | -6229243.896 | 5906848.408 |
| White-naped Crane | -5870653.76  | 6249818.378 |
| White-naped Crane | -6174264.312 | 5935997.247 |
| White-naped Crane | -5330556.081 | 5585134.98  |
| White-naped Crane | -6178369.775 | 5932654.111 |
| White-naped Crane | -6229240.556 | 5906853.287 |
| White-naped Crane | -5330553.854 | 5585133.412 |
| White-naped Crane | -6229243.896 | 5906858.167 |
| White-naped Crane | -6178370.888 | 5932670.424 |
| White-naped Crane | -5870654.873 | 6249804.831 |
| White-naped Crane | -6174264.312 | 5936013.566 |
| White-naped Crane | -5870649.307 | 6249806.524 |
| White-naped Crane | -5330558.307 | 5585141.251 |
| White-naped Crane | -6178370.888 | 5932654.111 |
| White-naped Crane | -6229240.556 | 5906846.782 |
| White-naped Crane | -6174266.539 | 5936007.039 |
| White-naped Crane | -6174273.218 | 5935998.879 |
| White-naped Crane | -5330553.854 | 5585138.116 |
| White-naped Crane | -5870654.873 | 6249799.751 |
| White-naped Crane | -6178369.775 | 5932647.586 |
| White-naped Crane | -6229241.669 | 5906858.167 |
| White-naped Crane | -5869195.474 | 6251479.711 |
| White-naped Crane | -6174277.671 | 5935998.879 |
| White-naped Crane | -6178372.002 | 5932647.586 |
| White-naped Crane | -6229114.765 | 5906854.914 |
| White-naped Crane | -5329681.109 | 5585802.941 |
| White-naped Crane | -6171771.869 | 5937781.11  |
| White-naped Crane | -6177995.742 | 5932980.373 |
| White-naped Crane | -5332363.909 | 5587498.157 |
| White-naped Crane | -6229161.519 | 5906645.109 |
| White-naped Crane | -5332167.987 | 5587560.891 |
| White-naped Crane | -6228789.712 | 5906386.521 |
| White-naped Crane | -5863936.742 | 6265864.625 |
| White-naped Crane | -5863927.836 | 6265857.839 |
| White-naped Crane | -6177504.823 | 5932497.51  |
| White-naped Crane | -5332245.91  | 5587607.942 |
| White-naped Crane | -6225497.995 | 5905553.884 |
| White-naped Crane | -6172679.123 | 5937102.121 |
| White-naped Crane | -6178364.209 | 5932641.061 |
| White-naped Crane | -5863928.949 | 6265844.266 |
| White-naped Crane | -5329703.373 | 5585853.119 |
| White-naped Crane | -6228700.657 | 5906545.901 |
| White-naped Crane | -5863823.196 | 6265730.595 |
| White-naped Crane | -5328990.928 | 5586060.104 |
| White-naped Crane | -6171717.322 | 5937725.613 |
| White-naped Crane | -6228725.147 | 5906503.616 |
| White-naped Crane | -6178321.908 | 5932892.281 |
| White-naped Crane | -6178288.512 | 5932703.05  |
| White-naped Crane | -5864489.999 | 6268706.902 |
| White-naped Crane | -6227768.912 | 5904905.069 |
| White-naped Crane | -6174088.428 | 5934732.609 |
| White-naped Crane | -5329100.022 | 5586133.805 |
| White-naped Crane | -5879667.299 | 6258936.912 |



|                   |              |             |
|-------------------|--------------|-------------|
| White-naped Crane | -5329242.511 | 5586035.015 |
| White-naped Crane | -6178319.681 | 5932908.594 |
| White-naped Crane | -6178360.87  | 5932642.692 |
| White-naped Crane | -6228302.133 | 5907035.447 |
| White-naped Crane | -5329787.976 | 5585878.208 |
| White-naped Crane | -5879378.981 | 6259275.957 |
| White-naped Crane | -6174229.803 | 5934934.939 |
| White-naped Crane | -6174154.106 | 5935158.486 |
| White-naped Crane | -5899300.717 | 6238845.935 |
| White-naped Crane | -6228380.056 | 5907095.626 |
| White-naped Crane | -5330569.439 | 5585127.14  |
| White-naped Crane | -5906715.709 | 6241251.061 |
| White-naped Crane | -6173977.108 | 5935533.797 |
| White-naped Crane | -6228456.867 | 5906994.786 |
| White-naped Crane | -6174010.504 | 5935584.384 |
| White-naped Crane | -5331275.204 | 5585677.499 |
| White-naped Crane | -6228501.395 | 5907001.292 |
| White-naped Crane | -6178355.304 | 5932650.849 |
| White-naped Crane | -6178358.643 | 5932644.324 |
| White-naped Crane | -6228508.074 | 5906980.148 |
| White-naped Crane | -5330622.872 | 5583789.8   |
| White-naped Crane | -6173955.957 | 5935654.553 |
| White-naped Crane | -6171766.303 | 5937790.903 |
| White-naped Crane | -6226330.665 | 5905083.935 |
| White-naped Crane | -6178606.886 | 5933146.771 |
| White-naped Crane | -5961996.968 | 6238957.55  |
| White-naped Crane | -5332179.119 | 5584680.293 |
| White-naped Crane | -6171806.378 | 5937817.019 |
| White-naped Crane | -6226005.612 | 5905287.197 |
| White-naped Crane | -5332176.892 | 5584708.514 |
| White-naped Crane | -5961494.917 | 6238243.915 |
| White-naped Crane | -6178503.359 | 5933050.521 |
| White-naped Crane | -6173753.356 | 5936204.502 |
| White-naped Crane | -6225588.164 | 5904948.972 |
| White-naped Crane | -5329781.297 | 5585842.143 |
| White-naped Crane | -6178363.096 | 5932649.217 |
| White-naped Crane | -5946736.179 | 6239630.654 |
| White-naped Crane | -6174079.522 | 5936261.621 |
| White-naped Crane | -6228493.602 | 5906928.102 |
| White-naped Crane | -5330418.044 | 5584689.7   |
| White-naped Crane | -6178366.436 | 5932647.586 |
| White-naped Crane | -5946730.613 | 6239622.197 |
| White-naped Crane | -6178372.002 | 5932645.955 |
| White-naped Crane | -5330424.724 | 5584694.403 |
| White-naped Crane | -6228494.716 | 5906919.97  |
| White-naped Crane | -6174115.144 | 5936282.836 |
| White-naped Crane | -5330426.95  | 5584689.7   |
| White-naped Crane | -5946735.066 | 6239632.345 |
| White-naped Crane | -6178376.454 | 5932647.586 |
| White-naped Crane | -6228493.602 | 5906919.97  |
| White-naped Crane | -5946725.047 | 6239628.963 |
| White-naped Crane | -6174095.107 | 5936284.468 |
| White-naped Crane | -5330422.497 | 5584686.564 |
| White-naped Crane | -6178372.002 | 5932641.061 |
| White-naped Crane | -6228489.15  | 5906915.091 |
| White-naped Crane | -6174095.107 | 5936286.1   |
| White-naped Crane | -5330424.724 | 5584689.7   |
| White-naped Crane | -5946733.952 | 6239630.654 |

|                   |              |             |
|-------------------|--------------|-------------|
| White-naped Crane | -6228493.602 | 5906924.85  |
| White-naped Crane | -6178359.756 | 5932644.324 |
| White-naped Crane | -5946728.386 | 6239639.11  |
| White-naped Crane | -5330420.271 | 5584700.675 |
| White-naped Crane | -6228490.263 | 5906928.102 |
| White-naped Crane | -6174085.088 | 5936290.996 |
| White-naped Crane | -6178374.228 | 5932637.798 |
| White-naped Crane | -5946733.952 | 6239639.11  |
| White-naped Crane | -6174083.975 | 5936287.732 |
| White-naped Crane | -6228493.602 | 5906931.355 |
| White-naped Crane | -5330422.497 | 5584702.243 |
| White-naped Crane | -6178372.002 | 5932650.849 |
| White-naped Crane | -6174080.635 | 5936271.412 |
| White-naped Crane | -6228486.923 | 5906926.476 |
| White-naped Crane | -5330464.799 | 5584711.65  |
| White-naped Crane | -5946733.952 | 6239635.728 |
| White-naped Crane | -6178370.888 | 5932647.586 |
| White-naped Crane | -5946741.745 | 6239652.641 |
| White-naped Crane | -6174089.541 | 5936277.94  |
| White-naped Crane | -6228488.036 | 5906976.895 |
| White-naped Crane | -5332250.363 | 5580943.328 |
| White-naped Crane | -6178367.549 | 5932634.536 |
| White-naped Crane | -5944871.577 | 6244887.123 |
| White-naped Crane | -6172199.336 | 5937595.035 |
| White-naped Crane | -5333325.709 | 5584743.007 |
| White-naped Crane | -6225674.993 | 5905329.476 |
| White-naped Crane | -6178259.569 | 5932815.609 |
| White-naped Crane | -6171286.516 | 5936465.618 |
| White-naped Crane | -5945012.953 | 6244816.045 |
| White-naped Crane | -5332844.809 | 5584601.901 |
| White-naped Crane | -6228215.304 | 5906931.355 |
| White-naped Crane | -6178180.532 | 5933079.885 |
| White-naped Crane | -6171230.856 | 5936441.138 |
| White-naped Crane | -6228106.21  | 5906931.355 |
| White-naped Crane | -5330542.722 | 5584056.312 |
| White-naped Crane | -6178363.096 | 5932645.955 |
| White-naped Crane | -5330148.651 | 5584797.882 |
| White-naped Crane | -6178360.87  | 5932634.536 |
| White-naped Crane | -6227714.366 | 5907637.252 |
| White-naped Crane | -6171327.704 | 5936584.755 |
| White-naped Crane | -5929421.545 | 6253475.103 |
| White-naped Crane | -6173879.147 | 5935427.729 |
| White-naped Crane | -6227596.367 | 5908136.619 |
| White-naped Crane | -5332181.345 | 5584738.303 |
| White-naped Crane | -6178496.679 | 5932734.044 |
| White-naped Crane | -5929145.473 | 6253603.854 |
| White-naped Crane | -5331838.481 | 5585368.604 |
| White-naped Crane | -6178366.436 | 5932649.217 |
| White-naped Crane | -6173708.828 | 5935951.554 |
| White-naped Crane | -5332018.819 | 5586320.411 |
| White-naped Crane | -6172331.806 | 5936286.1   |
| White-naped Crane | -6178368.662 | 5932647.586 |
| White-naped Crane | -6229517.742 | 5908287.899 |
| White-naped Crane | -6173665.414 | 5935951.554 |
| White-naped Crane | -5331934.216 | 5586583.861 |
| White-naped Crane | -6178364.209 | 5932644.324 |
| White-naped Crane | -6229250.575 | 5908224.459 |
| White-naped Crane | -5329779.07  | 5585878.208 |

|                   |              |             |
|-------------------|--------------|-------------|
| White-naped Crane | -6011292.578 | 6322261.139 |
| White-naped Crane | -6228363.359 | 5914824.741 |
| White-naped Crane | -6178340.832 | 5932991.792 |
| White-naped Crane | -6173698.809 | 5935931.971 |
| White-naped Crane | -6173679.885 | 5935886.278 |
| White-naped Crane | -6228490.263 | 5907009.424 |
| White-naped Crane | -6178056.967 | 5933216.92  |
| White-naped Crane | -6065726.696 | 6315593.667 |
| White-naped Crane | -6173660.961 | 5935945.026 |
| White-naped Crane | -5329663.298 | 5585719.835 |
| White-naped Crane | -6228509.187 | 5907001.292 |
| White-naped Crane | -6172532.181 | 5937692.969 |
| White-naped Crane | -5329718.958 | 5585754.332 |
| White-naped Crane | -6178292.965 | 5932704.681 |
| White-naped Crane | -6065629.848 | 6315620.974 |
| White-naped Crane | -6228526.998 | 5907014.303 |
| White-naped Crane | -5329759.033 | 5585893.888 |
| White-naped Crane | -6228460.206 | 5906853.287 |
| White-naped Crane | -6065642.093 | 6315550.998 |
| White-naped Crane | -6178361.983 | 5932644.324 |
| White-naped Crane | -6171273.158 | 5936302.42  |
| White-naped Crane | -6065594.225 | 6315607.321 |
| White-naped Crane | -6172085.79  | 5938011.26  |
| White-naped Crane | -6178394.265 | 5932696.524 |
| White-naped Crane | -6228297.68  | 5907059.844 |
| White-naped Crane | -5329663.298 | 5585713.563 |
| White-naped Crane | -6173829.053 | 5935455.47  |
| White-naped Crane | -5329678.883 | 5585737.084 |
| White-naped Crane | -6066423.556 | 6311385.92  |
| White-naped Crane | -6226161.459 | 5904929.459 |
| White-naped Crane | -6178064.76  | 5932962.428 |
| White-naped Crane | -6174100.673 | 5934726.083 |
| White-naped Crane | -5329669.977 | 5585722.972 |
| White-naped Crane | -6227289.125 | 5904705.068 |
| White-naped Crane | -6066558.252 | 6311408.096 |
| White-naped Crane | -6178365.322 | 5932647.586 |
| White-naped Crane | -5329678.883 | 5585773.149 |
| White-naped Crane | -6227291.352 | 5904698.564 |
| White-naped Crane | -6178363.096 | 5932641.061 |
| White-naped Crane | -6174304.387 | 5936356.275 |
| White-naped Crane | -6066558.252 | 6311391.037 |
| White-naped Crane | -6066544.894 | 6311375.684 |
| White-naped Crane | -6174301.048 | 5936362.803 |
| White-naped Crane | -5329672.204 | 5585773.149 |
| White-naped Crane | -6227290.239 | 5904692.06  |
| White-naped Crane | -6178367.549 | 5932647.586 |
| White-naped Crane | -6066552.686 | 6311411.508 |
| White-naped Crane | -6227286.899 | 5904696.938 |
| White-naped Crane | -5329672.204 | 5585774.717 |
| White-naped Crane | -6178366.436 | 5932649.217 |
| White-naped Crane | -5329672.204 | 5585780.989 |
| White-naped Crane | -6066550.46  | 6311401.273 |
| White-naped Crane | -6227286.899 | 5904701.816 |
| White-naped Crane | -6178359.756 | 5932642.692 |
| White-naped Crane | -6174341.123 | 5936367.699 |
| White-naped Crane | -6066558.252 | 6311384.214 |
| White-naped Crane | -6174299.935 | 5936361.171 |
| White-naped Crane | -5329678.883 | 5585771.581 |

|                   |              |             |
|-------------------|--------------|-------------|
| White-naped Crane | -6227289.125 | 5904693.686 |
| White-naped Crane | -6178353.077 | 5932652.48  |
| White-naped Crane | -6174303.274 | 5936359.539 |
| White-naped Crane | -6227280.22  | 5904672.548 |
| White-naped Crane | -5329674.43  | 5585780.989 |
| White-naped Crane | -6178363.096 | 5932652.48  |
| White-naped Crane | -6227286.899 | 5904669.296 |
| White-naped Crane | -5329676.657 | 5585780.989 |
| White-naped Crane | -6174299.935 | 5936361.171 |
| White-naped Crane | -6066546.007 | 6311401.273 |
| White-naped Crane | -5329763.486 | 5585857.823 |
| White-naped Crane | -6227264.635 | 5904732.71  |
| White-naped Crane | -6178141.57  | 5932693.262 |
| White-naped Crane | -6171681.7   | 5937601.564 |
| White-naped Crane | -5331504.523 | 5586417.636 |
| White-naped Crane | -6225599.296 | 5904914.825 |
| White-naped Crane | -6177997.968 | 5933076.622 |
| White-naped Crane | -5329767.939 | 5585931.522 |
| White-naped Crane | -6065600.905 | 6315033.876 |
| White-naped Crane | -6178102.608 | 5933119.038 |
| White-naped Crane | -6171697.285 | 5937619.519 |
| White-naped Crane | -6228156.304 | 5906937.861 |
| White-naped Crane | -6173816.808 | 5935576.224 |
| White-naped Crane | -6178113.74  | 5932946.115 |
| White-naped Crane | -6065718.903 | 6313499.765 |
| White-naped Crane | -6178364.209 | 5932641.061 |
| White-naped Crane | -6228180.795 | 5907015.93  |
| White-naped Crane | -6173958.184 | 5935535.429 |
| White-naped Crane | -6173962.637 | 5935652.921 |
| White-naped Crane | -6065685.507 | 6313359.849 |
| White-naped Crane | -6228195.266 | 5906960.631 |
| White-naped Crane | -6178360.87  | 5932641.061 |
| White-naped Crane | -5330188.726 | 5586224.755 |
| White-naped Crane | -6173952.618 | 5935636.602 |
| White-naped Crane | -6228119.569 | 5907072.855 |
| White-naped Crane | -5329736.769 | 5585595.962 |
| White-naped Crane | -6177974.591 | 5932975.479 |
| White-naped Crane | -6173951.505 | 5935633.339 |
| White-naped Crane | -5329792.429 | 5585864.095 |
| White-naped Crane | -6173943.712 | 5935665.976 |
| White-naped Crane | -6228942.22  | 5915446.626 |
| White-naped Crane | -6178269.588 | 5932866.18  |
| White-naped Crane | -6173932.58  | 5935742.673 |
| White-naped Crane | -6228078.381 | 5914614.744 |
| White-naped Crane | -5330206.537 | 5586141.645 |
| White-naped Crane | -6178359.756 | 5932642.692 |
| White-naped Crane | -6077649.013 | 6355087.292 |
| White-naped Crane | -6228117.342 | 5914665.208 |
| White-naped Crane | -6178477.755 | 5932799.296 |
| White-naped Crane | -5329725.637 | 5585995.813 |
| White-naped Crane | -6173639.81  | 5936007.039 |
| White-naped Crane | -6178354.19  | 5932649.217 |
| White-naped Crane | -5329792.429 | 5586111.851 |
| White-naped Crane | -6228401.207 | 5914570.791 |
| White-naped Crane | -6173643.15  | 5935977.664 |
| White-naped Crane | -6173516.245 | 5936044.573 |
| White-naped Crane | -5329678.883 | 5585799.805 |
| White-naped Crane | -6178364.209 | 5932645.955 |

|                   |              |             |
|-------------------|--------------|-------------|
| White-naped Crane | -6069950.157 | 6328633.097 |
| White-naped Crane | -6173535.17  | 5936073.947 |
| White-naped Crane | -6069862.215 | 6328349.339 |
| White-naped Crane | -6229241.669 | 5906760.583 |
| White-naped Crane | -5330233.254 | 5586240.436 |
| White-naped Crane | -6178467.736 | 5932854.761 |
| White-naped Crane | -6069843.29  | 6328409.167 |
| White-naped Crane | -6178360.87  | 5932645.955 |
| White-naped Crane | -6171834.208 | 5937691.337 |
| White-naped Crane | -5329767.939 | 5586044.423 |
| White-naped Crane | -6229143.708 | 5906820.759 |
| White-naped Crane | -6226370.74  | 5905075.805 |
| White-naped Crane | -6069848.856 | 6328393.783 |
| White-naped Crane | -6178361.983 | 5932642.692 |
| White-naped Crane | -5330222.122 | 5586234.164 |
| White-naped Crane | -6069552.747 | 6328521.986 |
| White-naped Crane | -6173686.564 | 5935936.867 |
| White-naped Crane | -6178593.527 | 5933246.285 |
| White-naped Crane | -5330400.233 | 5585497.178 |
| White-naped Crane | -6226006.725 | 5905259.553 |
| White-naped Crane | -6069783.178 | 6323257.023 |
| White-naped Crane | -6174140.748 | 5935768.783 |
| White-naped Crane | -5330395.78  | 5585506.586 |
| White-naped Crane | -6178367.549 | 5932644.324 |
| White-naped Crane | -6227281.333 | 5904677.426 |
| White-naped Crane | -5330400.233 | 5585492.474 |
| White-naped Crane | -6227279.107 | 5904672.548 |
| White-naped Crane | -6178365.322 | 5932628.011 |
| White-naped Crane | -6069787.631 | 6323258.732 |
| White-naped Crane | -6174112.918 | 5935703.508 |
| White-naped Crane | -6069778.725 | 6323253.607 |
| White-naped Crane | -5330393.554 | 5585500.314 |
| White-naped Crane | -6227275.767 | 5904666.044 |
| White-naped Crane | -6178367.549 | 5932637.798 |
| White-naped Crane | -6174141.861 | 5935750.832 |
| White-naped Crane | -5330398.007 | 5585495.61  |
| White-naped Crane | -6174140.748 | 5935757.36  |
| White-naped Crane | -6069774.272 | 6323257.023 |
| White-naped Crane | -6178363.096 | 5932641.061 |
| White-naped Crane | -6227272.428 | 5904669.296 |
| White-naped Crane | -6069768.706 | 6323274.106 |
| White-naped Crane | -6174137.408 | 5935763.887 |
| White-naped Crane | -6227267.975 | 5904672.548 |
| White-naped Crane | -5330393.554 | 5585503.45  |
| White-naped Crane | -6178382.02  | 5932647.586 |
| White-naped Crane | -6174140.748 | 5935760.623 |
| White-naped Crane | -5330411.365 | 5585519.13  |
| White-naped Crane | -6227274.654 | 5904669.296 |
| White-naped Crane | -6178384.247 | 5932645.955 |
| White-naped Crane | -6174142.974 | 5935744.305 |
| White-naped Crane | -5330418.044 | 5585512.858 |
| White-naped Crane | -6227272.428 | 5904670.922 |
| White-naped Crane | -6178378.681 | 5932659.005 |
| White-naped Crane | -6174140.748 | 5935745.937 |
| White-naped Crane | -5330415.818 | 5585525.402 |
| White-naped Crane | -6227293.578 | 5904672.548 |
| White-naped Crane | -6069782.065 | 6323257.023 |
| White-naped Crane | -6178390.926 | 5932634.536 |

|                   |              |             |
|-------------------|--------------|-------------|
| White-naped Crane | -6069765.367 | 6323267.273 |
| White-naped Crane | -6174148.54  | 5935762.255 |
| White-naped Crane | -5331379.845 | 5586014.63  |
| White-naped Crane | -6227286.899 | 5904825.393 |
| White-naped Crane | -6178290.738 | 5932461.623 |
| White-naped Crane | -6178062.533 | 5932525.241 |
| White-naped Crane | -6227282.446 | 5904680.678 |
| White-naped Crane | -6171690.606 | 5937684.808 |
| White-naped Crane | -5330208.764 | 5586231.028 |
| White-naped Crane | -6225660.521 | 5905360.373 |
| White-naped Crane | -6178288.512 | 5932727.519 |
| White-naped Crane | -6069183.166 | 6324203.48  |
| White-naped Crane | -5329765.712 | 5585940.93  |
| White-naped Crane | -6178326.361 | 5932875.968 |
| White-naped Crane | -6225210.791 | 5905760.41  |
| White-naped Crane | -6172611.218 | 5937160.878 |
| White-naped Crane | -6172549.992 | 5937098.857 |
| White-naped Crane | -5330233.254 | 5586191.825 |
| White-naped Crane | -6226152.553 | 5904846.531 |
| White-naped Crane | -6178367.549 | 5933037.47  |
| White-naped Crane | -6227195.617 | 5904892.06  |
| White-naped Crane | -6178006.874 | 5933287.07  |
| White-naped Crane | -5329469.602 | 5581408.796 |
| White-naped Crane | -6172505.464 | 5937040.101 |
| White-naped Crane | -6174301.048 | 5934931.675 |
| White-naped Crane | -6178091.476 | 5932978.742 |
| White-naped Crane | -5329469.602 | 5581753.602 |
| White-naped Crane | -6229222.745 | 5906736.187 |
| White-naped Crane | -6174155.219 | 5934977.363 |
| White-naped Crane | -6178171.627 | 5932977.11  |
| White-naped Crane | -6229189.349 | 5906728.055 |
| White-naped Crane | -6174146.314 | 5934894.146 |
| White-naped Crane | -6229202.707 | 5906856.54  |
| White-naped Crane | -6178183.872 | 5933030.945 |
| White-naped Crane | -5329641.034 | 5581603.14  |
| White-naped Crane | -5331477.806 | 5584779.068 |
| White-naped Crane | -6174138.521 | 5934961.046 |
| White-naped Crane | -5855310.594 | 6304849.871 |
| White-naped Crane | -6178183.872 | 5932848.235 |
| White-naped Crane | -6178183.872 | 5932900.438 |
| White-naped Crane | -5331437.731 | 5584775.932 |
| White-naped Crane | -6174226.464 | 5936341.587 |
| White-naped Crane | -6174206.426 | 5936354.643 |
| White-naped Crane | -5331549.05  | 5584852.757 |
| White-naped Crane | -6226919.545 | 5916298.126 |
| White-naped Crane | -6178358.643 | 5932644.324 |
| White-naped Crane | -5331582.446 | 5584896.658 |
| White-naped Crane | -6173498.434 | 5936163.704 |
| White-naped Crane | -5856959.236 | 6302409.334 |
| White-naped Crane | -6227065.373 | 5916325.805 |
| White-naped Crane | -6178349.738 | 5932631.273 |
| White-naped Crane | -5858332.918 | 6302792.751 |
| White-naped Crane | -6178502.245 | 5932817.24  |
| White-naped Crane | -6229296.216 | 5906741.066 |
| White-naped Crane | -5331600.257 | 5585139.684 |
| White-naped Crane | -6178373.115 | 5933153.297 |
| White-naped Crane | -6228341.095 | 5906986.654 |
| White-naped Crane | -6172183.751 | 5937169.038 |

|                   |              |             |
|-------------------|--------------|-------------|
| White-naped Crane | -5329959.408 | 5585617.914 |
| White-naped Crane | -6174524.8   | 5935145.432 |
| White-naped Crane | -5860033.88  | 6301645.96  |
| White-naped Crane | -6178011.326 | 5933008.106 |
| White-naped Crane | -5859413.831 | 6301657.887 |
| White-naped Crane | -5330141.972 | 5585661.819 |
| White-naped Crane | -6178364.209 | 5932647.586 |
| White-naped Crane | -6178366.436 | 5932634.536 |
| White-naped Crane | -5859418.283 | 6301634.033 |
| White-naped Crane | -5330146.425 | 5585668.091 |
| White-naped Crane | -6229197.142 | 5906788.231 |
| White-naped Crane | -5859397.133 | 6301635.737 |
| White-naped Crane | -5330146.425 | 5585666.523 |
| White-naped Crane | -6178361.983 | 5932645.955 |
| White-naped Crane | -6229128.123 | 5906721.549 |
| White-naped Crane | -6174535.932 | 5935189.489 |
| White-naped Crane | -5859383.774 | 6301628.922 |
| White-naped Crane | -5330141.972 | 5585666.523 |
| White-naped Crane | -6229108.086 | 5906692.274 |
| White-naped Crane | -6178374.228 | 5932639.43  |
| White-naped Crane | -6174527.026 | 5935199.28  |
| White-naped Crane | -6174609.403 | 5935191.121 |
| White-naped Crane | -5330141.972 | 5585674.363 |
| White-naped Crane | -5859383.774 | 6301620.402 |
| White-naped Crane | -6229079.143 | 5906721.549 |
| White-naped Crane | -6178359.756 | 5932644.324 |
| White-naped Crane | -5859381.548 | 6301632.329 |
| White-naped Crane | -5330144.198 | 5585672.795 |
| White-naped Crane | -6229094.728 | 5906698.78  |
| White-naped Crane | -6174613.856 | 5935184.594 |
| White-naped Crane | -6178355.304 | 5932645.955 |
| White-naped Crane | -6174610.516 | 5935182.962 |
| White-naped Crane | -6229088.048 | 5906693.901 |
| White-naped Crane | -5330141.972 | 5585672.795 |
| White-naped Crane | -6178354.19  | 5932642.692 |
| White-naped Crane | -5859448.34  | 6301632.329 |
| White-naped Crane | -6174610.516 | 5935179.699 |
| White-naped Crane | -6229083.596 | 5906697.153 |
| White-naped Crane | -5330146.425 | 5585668.091 |
| White-naped Crane | -6178364.209 | 5932647.586 |
| White-naped Crane | -6229043.521 | 5906674.384 |
| White-naped Crane | -5330431.403 | 5586260.822 |
| White-naped Crane | -6178172.74  | 5932499.141 |
| White-naped Crane | -6172246.09  | 5937438.344 |
| White-naped Crane | -6171783.001 | 5937888.839 |
| White-naped Crane | -6226034.555 | 5905205.892 |
| White-naped Crane | -5329761.259 | 5585911.137 |
| White-naped Crane | -5861207.188 | 6298370.042 |
| White-naped Crane | -6178131.551 | 5932691.631 |
| White-naped Crane | -6228210.851 | 5906924.85  |
| White-naped Crane | -6178359.756 | 5932644.324 |
| White-naped Crane | -5331333.091 | 5586077.353 |
| White-naped Crane | -5864685.922 | 6279337.946 |
| White-naped Crane | -5329663.298 | 5585473.658 |
| White-naped Crane | -6228207.511 | 5906919.97  |
| White-naped Crane | -6172361.862 | 5937883.942 |
| White-naped Crane | -6178358.643 | 5932637.798 |
| White-naped Crane | -6228208.624 | 5906926.476 |

|                   |              |             |
|-------------------|--------------|-------------|
| White-naped Crane | -5329636.582 | 5585312.157 |
| White-naped Crane | -6178429.888 | 5932761.776 |
| White-naped Crane | -6172005.64  | 5937924.749 |
| White-naped Crane | -6228524.772 | 5907100.505 |
| White-naped Crane | -6173637.584 | 5935786.733 |
| White-naped Crane | -6178472.189 | 5932805.821 |
| White-naped Crane | -5867811.773 | 6259335.291 |
| White-naped Crane | -6178437.68  | 5932618.223 |
| White-naped Crane | -6173758.922 | 5935556.643 |
| White-naped Crane | -6173833.506 | 5935439.152 |
| White-naped Crane | -5871539.863 | 6253088.861 |
| White-naped Crane | -6178358.643 | 5932644.324 |
| White-naped Crane | -6228037.192 | 5907126.528 |
| White-naped Crane | -5871595.522 | 6252519.695 |
| White-naped Crane | -6174366.726 | 5934951.256 |
| White-naped Crane | -6178365.322 | 5932642.692 |
| White-naped Crane | -6226136.969 | 5904810.759 |
| White-naped Crane | -6172532.181 | 5937606.461 |
| White-naped Crane | -6178286.286 | 5932458.36  |
| White-naped Crane | -6172396.371 | 5937123.339 |
| White-naped Crane | -5402115.589 | 5763276.802 |
| White-naped Crane | -6228201.945 | 5906937.861 |
| White-naped Crane | -6178360.87  | 5932659.005 |
| White-naped Crane | -5402133.4   | 5763332.795 |
| White-naped Crane | -6228211.964 | 5906929.729 |
| White-naped Crane | -5860048.352 | 6301606.771 |
| White-naped Crane | -6174160.785 | 5935050.791 |
| White-naped Crane | -6178148.249 | 5932479.566 |
| White-naped Crane | -5859927.013 | 6301599.956 |
| White-naped Crane | -5402271.436 | 5763423.985 |
| White-naped Crane | -6228514.753 | 5907014.303 |
| White-naped Crane | -6174254.294 | 5934983.89  |
| White-naped Crane | -5402512.999 | 5763334.395 |
| White-naped Crane | -6172145.902 | 5937606.461 |
| White-naped Crane | -5859760.034 | 6301783.976 |
| White-naped Crane | -6228551.488 | 5907077.735 |
| White-naped Crane | -6178084.797 | 5933032.576 |
| White-naped Crane | -5859439.434 | 6301579.509 |
| White-naped Crane | -6172332.919 | 5936289.364 |
| White-naped Crane | -5402582.017 | 5763289.6   |
| White-naped Crane | -6226153.667 | 5905139.222 |
| White-naped Crane | -6178365.322 | 5932634.536 |
| White-naped Crane | -5859736.657 | 6301858.948 |
| White-naped Crane | -6174496.97  | 5935714.931 |
| White-naped Crane | -6178359.756 | 5932641.061 |
| White-naped Crane | -5402990.56  | 5761835.497 |
| White-naped Crane | -6226085.762 | 5905194.509 |
| White-naped Crane | -6174604.95  | 5934683.659 |
| White-naped Crane | -5402995.013 | 5761833.897 |
| White-naped Crane | -6228215.304 | 5906934.608 |
| White-naped Crane | -5859141.098 | 6301729.451 |
| White-naped Crane | -5402997.239 | 5761829.099 |
| White-naped Crane | -5859178.946 | 6301700.485 |
| White-naped Crane | -6178361.983 | 5932641.061 |
| White-naped Crane | -6228216.417 | 5906915.091 |
| White-naped Crane | -6174613.856 | 5934721.188 |
| White-naped Crane | -5859172.267 | 6301686.854 |
| White-naped Crane | -6174607.176 | 5934685.291 |



|                   |              |             |
|-------------------|--------------|-------------|
| White-naped Crane | -5403002.805 | 5761816.302 |
| White-naped Crane | -6228215.304 | 5906911.838 |
| White-naped Crane | -6178369.775 | 5932645.955 |
| White-naped Crane | -6174601.61  | 5934695.081 |
| White-naped Crane | -5402998.352 | 5761813.103 |
| White-naped Crane | -5859176.72  | 6301693.669 |
| White-naped Crane | -6228215.304 | 5906913.465 |
| White-naped Crane | -6178364.209 | 5932645.955 |
| White-naped Crane | -6174606.063 | 5934698.344 |
| White-naped Crane | -5402997.239 | 5761819.502 |
| White-naped Crane | -6228214.19  | 5906924.85  |
| White-naped Crane | -6178363.096 | 5932649.217 |
| White-naped Crane | -5859153.343 | 6301703.892 |
| White-naped Crane | -6174606.063 | 5934695.081 |
| White-naped Crane | -5403000.579 | 5761817.902 |
| White-naped Crane | -6228214.19  | 5906937.861 |
| White-naped Crane | -6178361.983 | 5932650.849 |
| White-naped Crane | -5403003.918 | 5761814.703 |
| White-naped Crane | -6228216.417 | 5906916.718 |
| White-naped Crane | -5859138.871 | 6301715.82  |
| White-naped Crane | -6174597.158 | 5934696.713 |
| White-naped Crane | -6178358.643 | 5932626.38  |
| White-naped Crane | -5859145.551 | 6301707.3   |
| White-naped Crane | -6174313.293 | 5935075.267 |
| White-naped Crane | -5403005.032 | 5761817.902 |
| White-naped Crane | -6228237.567 | 5907041.953 |
| White-naped Crane | -6178361.983 | 5932641.061 |
| White-naped Crane | -5402359.378 | 5763080.028 |
| White-naped Crane | -6228236.454 | 5907035.447 |
| White-naped Crane | -5402450.66  | 5763121.622 |
| White-naped Crane | -6228168.549 | 5907063.097 |
| White-naped Crane | -6177796.48  | 5932556.235 |
| White-naped Crane | -6168905.392 | 5940130.235 |
| White-naped Crane | -6168927.656 | 5940042.07  |
| White-naped Crane | -5402521.905 | 5762984.043 |
| White-naped Crane | -6228020.494 | 5907129.781 |
| White-naped Crane | -5859418.283 | 6301606.771 |
| White-naped Crane | -6173773.393 | 5934629.815 |
| White-naped Crane | -5402534.15  | 5762963.246 |
| White-naped Crane | -6227987.099 | 5907103.758 |
| White-naped Crane | -6168846.393 | 5939849.416 |
| White-naped Crane | -5859423.849 | 6301615.29  |
| White-naped Crane | -6171318.799 | 5936454.194 |
| White-naped Crane | -6227989.325 | 5907103.758 |
| White-naped Crane | -5859701.035 | 6301768.641 |
| White-naped Crane | -6172557.785 | 5935693.717 |
| White-naped Crane | -6227984.872 | 5907098.879 |
| White-naped Crane | -6178365.322 | 5932641.061 |
| White-naped Crane | -6174830.929 | 5934672.238 |
| White-naped Crane | -6227989.325 | 5907105.384 |
| White-naped Crane | -5857246.44  | 6303264.804 |
| White-naped Crane | -6178368.662 | 5932645.955 |
| White-naped Crane | -6228214.19  | 5906928.102 |
| White-naped Crane | -6178363.096 | 5932639.43  |
| White-naped Crane | -6178482.208 | 5932424.104 |
| White-naped Crane | -6178336.379 | 5932494.247 |
| White-naped Crane | -5879902.183 | 6262428.033 |
| White-naped Crane | -6224844.549 | 5929519.366 |

|                   |              |             |
|-------------------|--------------|-------------|
| White-naped Crane | -6228661.695 | 5907624.24  |
| White-naped Crane | -5879905.522 | 6262397.507 |
| White-naped Crane | -6224821.172 | 5929405.218 |
| White-naped Crane | -6228646.11  | 5907596.588 |
| White-naped Crane | -6178485.547 | 5932727.519 |
| White-naped Crane | -6224816.72  | 5929408.48  |
| White-naped Crane | -6228632.752 | 5907596.588 |
| White-naped Crane | -6178367.549 | 5932642.692 |
| White-naped Crane | -6224574.043 | 5929558.502 |
| White-naped Crane | -6228216.417 | 5906916.718 |
| White-naped Crane | -6228089.513 | 5907027.315 |
| White-naped Crane | -5884106.72  | 6259235.271 |
| White-naped Crane | -6178363.096 | 5932644.324 |
| White-naped Crane | -6224886.851 | 5929501.428 |
| White-naped Crane | -5884172.399 | 6259526.858 |
| White-naped Crane | -6224935.831 | 5929463.923 |
| White-naped Crane | -6178364.209 | 5932645.955 |
| White-naped Crane | -6228024.947 | 5907142.793 |
| White-naped Crane | -5517856.69  | 5888939.067 |
| White-naped Crane | -5884122.305 | 6259282.738 |
| White-naped Crane | -5517836.652 | 5888950.429 |
| White-naped Crane | -6228232.002 | 5907072.855 |
| White-naped Crane | -6224944.737 | 5929452.508 |
| White-naped Crane | -6178172.74  | 5932517.085 |
| White-naped Crane | -6224942.511 | 5929431.309 |
| White-naped Crane | -5517836.652 | 5888921.214 |
| White-naped Crane | -5884106.72  | 6259228.49  |
| White-naped Crane | -6228238.681 | 5907030.568 |
| White-naped Crane | -6178245.097 | 5932667.161 |
| White-naped Crane | -5884101.154 | 6259223.404 |
| White-naped Crane | -5517833.313 | 5888942.314 |
| White-naped Crane | -6224936.945 | 5929432.94  |
| White-naped Crane | -6228240.907 | 5907040.326 |
| White-naped Crane | -6178368.662 | 5932632.905 |
| White-naped Crane | -5884097.814 | 6259230.185 |
| White-naped Crane | -6224934.718 | 5929439.462 |
| White-naped Crane | -6228245.36  | 5907020.809 |
| White-naped Crane | -6178359.756 | 5932637.798 |
| White-naped Crane | -5523179.988 | 5887110.089 |
| White-naped Crane | -5523194.459 | 5887124.694 |
| White-naped Crane | -6224925.813 | 5929431.309 |
| White-naped Crane | -6228242.02  | 5907040.326 |
| White-naped Crane | -5884105.607 | 6259230.185 |
| White-naped Crane | -6178363.096 | 5932639.43  |
| White-naped Crane | -5884105.607 | 6259231.88  |
| White-naped Crane | -6228242.02  | 5907040.326 |
| White-naped Crane | -5523207.818 | 5887119.826 |
| White-naped Crane | -6178369.775 | 5932645.955 |
| White-naped Crane | -6224934.718 | 5929431.309 |
| White-naped Crane | -6224946.963 | 5929436.201 |
| White-naped Crane | -6228240.907 | 5907040.326 |
| White-naped Crane | -5884106.72  | 6259233.575 |
| White-naped Crane | -5523215.61  | 5887116.58  |
| White-naped Crane | -6178383.134 | 5932637.798 |
| White-naped Crane | -5884103.38  | 6259223.404 |
| White-naped Crane | -6224942.511 | 5929432.94  |
| White-naped Crane | -5523186.667 | 5887129.562 |
| White-naped Crane | -6228242.02  | 5907038.7   |

|                   |              |             |
|-------------------|--------------|-------------|
| White-naped Crane | -6178384.247 | 5932647.586 |
| White-naped Crane | -5883854.025 | 6259194.585 |
| White-naped Crane | -6224955.869 | 5929496.536 |
| White-naped Crane | -5523187.78  | 5887090.617 |
| White-naped Crane | -6223296.095 | 5929600.9   |
| White-naped Crane | -5523099.838 | 5886994.878 |
| White-naped Crane | -5883404.294 | 6259086.09  |
| White-naped Crane | -6225934.367 | 5905064.422 |
| White-naped Crane | -6178600.207 | 5932885.756 |
| White-naped Crane | -5883608.009 | 6259508.21  |
| White-naped Crane | -6230623.144 | 5933210.395 |
| White-naped Crane | -6225685.012 | 5904843.279 |
| White-naped Crane | -6178624.697 | 5933274.019 |
| White-naped Crane | -5521978.851 | 5888161.664 |
| White-naped Crane | -6230706.634 | 5932955.903 |
| White-naped Crane | -6225739.558 | 5905088.814 |
| White-naped Crane | -5517833.313 | 5888596.612 |
| White-naped Crane | -6178355.304 | 5933424.109 |
| White-naped Crane | -6230593.088 | 5933238.128 |
| White-naped Crane | -6225650.503 | 5904974.989 |
| White-naped Crane | -5513781.283 | 5889583.44  |
| White-naped Crane | -6178039.156 | 5933305.015 |
| White-naped Crane | -5877426.437 | 6253151.539 |
| White-naped Crane | -6225129.527 | 5905301.832 |
| White-naped Crane | -6230509.598 | 5935473.42  |
| White-naped Crane | -6178197.23  | 5933433.897 |
| White-naped Crane | -6178443.246 | 5933212.026 |
| White-naped Crane | -5471781.553 | 5898229.489 |
| White-naped Crane | -6225113.943 | 5905048.162 |
| White-naped Crane | -6230489.561 | 5935543.588 |
| White-naped Crane | -6230468.41  | 5935546.852 |
| White-naped Crane | -5471812.722 | 5898203.493 |
| White-naped Crane | -6225090.565 | 5905184.753 |
| White-naped Crane | -6178363.096 | 5932639.43  |
| White-naped Crane | -5471856.137 | 5898180.746 |
| White-naped Crane | -6225165.15  | 5905150.605 |
| White-naped Crane | -6225258.658 | 5905116.457 |
| White-naped Crane | -5471998.626 | 5898414.717 |
| White-naped Crane | -6178365.322 | 5932662.268 |
| White-naped Crane | -6189122.125 | 5979092.745 |
| White-naped Crane | -6189747.74  | 5979691.405 |
| White-naped Crane | -5472038.701 | 5898434.215 |
| White-naped Crane | -6178697.055 | 5932778.089 |
| White-naped Crane | -6189706.552 | 5979722.569 |
| White-naped Crane | -6225787.425 | 5905423.792 |
| White-naped Crane | -5472038.701 | 5898429.341 |
| White-naped Crane | -6178670.338 | 5932822.134 |
| White-naped Crane | -5861186.037 | 6292567.518 |
| White-naped Crane | -5860492.516 | 6301647.664 |
| White-naped Crane | -5472006.418 | 5898382.221 |
| White-naped Crane | -6225731.766 | 5905283.945 |
| White-naped Crane | -6178487.774 | 5932825.397 |
| White-naped Crane | -6189696.533 | 5979809.502 |
| White-naped Crane | -5860028.314 | 6301513.059 |
| White-naped Crane | -6189716.571 | 5979752.094 |
| White-naped Crane | -5472049.833 | 5898354.599 |
| White-naped Crane | -6225896.519 | 5905370.129 |
| White-naped Crane | -6178117.08  | 5932921.645 |

|                   |              |             |
|-------------------|--------------|-------------|
| White-naped Crane | -5472014.21  | 5898422.841 |
| White-naped Crane | -6228001.57  | 5907121.649 |
| White-naped Crane | -6189735.495 | 5979679.924 |
| White-naped Crane | -6178360.87  | 5932637.798 |
| White-naped Crane | -6185169.17  | 5975086.896 |
| White-naped Crane | -5472060.964 | 5898443.964 |
| White-naped Crane | -6228013.815 | 5907120.023 |
| White-naped Crane | -6178357.53  | 5932642.692 |
| White-naped Crane | -6185207.018 | 5975163.945 |
| White-naped Crane | -6228528.111 | 5906919.97  |
| White-naped Crane | -5472047.606 | 5898422.841 |
| White-naped Crane | -6178360.87  | 5932642.692 |
| White-naped Crane | -6185245.98  | 5975191.815 |
| White-naped Crane | -5472057.625 | 5898437.465 |
| White-naped Crane | -5855292.783 | 6304826.008 |
| White-naped Crane | -6228520.319 | 5906911.838 |
| White-naped Crane | -6178364.209 | 5932639.43  |
| White-naped Crane | -6185234.848 | 5975186.896 |
| White-naped Crane | -6228493.602 | 5906913.465 |
| White-naped Crane | -5472052.059 | 5898447.214 |
| White-naped Crane | -6178364.209 | 5932644.324 |
| White-naped Crane | -5855291.67  | 6304839.644 |
| White-naped Crane | -6185238.188 | 5975196.733 |
| White-naped Crane | -6178364.209 | 5932644.324 |
| White-naped Crane | -5472045.38  | 5898447.214 |
| White-naped Crane | -6228498.055 | 5906923.223 |
| White-naped Crane | -5472045.38  | 5898437.465 |
| White-naped Crane | -5855297.236 | 6304839.644 |
| White-naped Crane | -6228495.829 | 5906915.091 |
| White-naped Crane | -6178359.756 | 5932657.374 |
| White-naped Crane | -6185232.622 | 5975193.454 |
| White-naped Crane | -5855295.009 | 6304829.417 |
| White-naped Crane | -6185235.961 | 5975191.815 |
| White-naped Crane | -5472048.719 | 5898440.714 |
| White-naped Crane | -6228508.074 | 5906924.85  |
| White-naped Crane | -6178354.19  | 5932644.324 |
| White-naped Crane | -6185245.98  | 5975193.454 |
| White-naped Crane | -6228502.508 | 5906921.597 |
| White-naped Crane | -5855305.028 | 6304831.122 |
| White-naped Crane | -5472049.833 | 5898440.714 |
| White-naped Crane | -6178356.417 | 5932610.067 |
| White-naped Crane | -5855336.198 | 6304844.758 |
| White-naped Crane | -5472049.833 | 5898443.964 |
| White-naped Crane | -6228499.168 | 5906916.718 |
| White-naped Crane | -6185243.754 | 5975196.733 |
| White-naped Crane | -6178375.341 | 5932626.38  |
| White-naped Crane | -6228491.376 | 5907006.171 |
| White-naped Crane | -5472063.191 | 5898435.84  |
| White-naped Crane | -5855396.31  | 6304853.28  |
| White-naped Crane | -6178510.038 | 5932872.705 |
| White-naped Crane | -6188128.042 | 5977998.863 |
| White-naped Crane | -5472050.946 | 5898484.585 |
| White-naped Crane | -6228004.91  | 5907115.143 |
| White-naped Crane | -6178591.301 | 5933425.74  |
| White-naped Crane | -5854658.262 | 6307702.048 |
| White-naped Crane | -6178540.094 | 5933440.423 |
| White-naped Crane | -5471527.744 | 5898135.252 |
| White-naped Crane | -6189982.624 | 5979791.459 |

|                   |              |             |
|-------------------|--------------|-------------|
| White-naped Crane | -6228006.023 | 5907113.517 |
| White-naped Crane | -5471584.517 | 5897782.684 |
| White-naped Crane | -6228209.738 | 5906928.102 |
| White-naped Crane | -6178079.231 | 5933645.985 |
| White-naped Crane | -6189939.21  | 5979804.581 |
| White-naped Crane | -6188097.986 | 5977993.943 |
| White-naped Crane | -6228214.19  | 5906923.223 |
| White-naped Crane | -6178147.136 | 5933645.985 |
| White-naped Crane | -5858711.405 | 6304476.586 |
| White-naped Crane | -5857862.037 | 6303499.988 |
| White-naped Crane | -6188012.269 | 5978000.502 |
| White-naped Crane | -5422803.203 | 5923347.802 |
| White-naped Crane | -6228111.776 | 5907082.614 |
| White-naped Crane | -6178270.701 | 5933828.711 |
| White-naped Crane | -6189380.386 | 5971667.908 |
| White-naped Crane | -6228213.077 | 5906924.85  |
| White-naped Crane | -6190147.377 | 5971602.36  |
| White-naped Crane | -6178661.432 | 5933324.592 |
| White-naped Crane | -5382700.356 | 5958663.276 |
| White-naped Crane | -6228216.417 | 5906931.355 |
| White-naped Crane | -6190101.736 | 5971522.066 |
| White-naped Crane | -5382435.416 | 5958643.641 |
| White-naped Crane | -6178616.904 | 5932853.129 |
| White-naped Crane | -6228142.946 | 5907076.108 |
| White-naped Crane | -6189110.993 | 5979094.385 |
| White-naped Crane | -5382351.926 | 5958445.662 |
| White-naped Crane | -6178363.096 | 5932650.849 |
| White-naped Crane | -6228210.851 | 5906929.729 |
| White-naped Crane | -5382256.192 | 5957976.094 |
| White-naped Crane | -6178356.417 | 5932650.849 |
| White-naped Crane | -6189109.88  | 5979081.264 |
| White-naped Crane | -6228214.19  | 5906926.476 |
| White-naped Crane | -6186570.682 | 5978520.366 |
| White-naped Crane | -5382160.457 | 5958105.346 |
| White-naped Crane | -6228208.624 | 5906926.476 |
| White-naped Crane | -6178360.87  | 5932647.586 |
| White-naped Crane | -6178455.491 | 5932738.938 |
| White-naped Crane | -6228207.511 | 5906919.97  |
| White-naped Crane | -5382354.153 | 5958483.294 |
| White-naped Crane | -5859618.658 | 6301669.815 |
| White-naped Crane | -6189444.951 | 5979863.63  |
| White-naped Crane | -5382412.039 | 5958326.223 |
| White-naped Crane | -6178959.769 | 5933265.862 |
| White-naped Crane | -6228213.077 | 5906908.585 |
| White-naped Crane | -6189443.838 | 5979860.35  |
| White-naped Crane | -5860211.991 | 6301879.395 |
| White-naped Crane | -6178973.127 | 5933319.698 |
| White-naped Crane | -5382400.907 | 5958336.04  |
| White-naped Crane | -6228213.077 | 5906921.597 |
| White-naped Crane | -5858895.082 | 6301918.586 |
| White-naped Crane | -5382334.115 | 5958826.899 |
| White-naped Crane | -6185889.407 | 5976409.948 |
| White-naped Crane | -6228211.964 | 5906924.85  |
| White-naped Crane | -6178722.658 | 5933164.716 |
| White-naped Crane | -5382245.06  | 5958270.594 |
| White-naped Crane | -5855354.009 | 6304693.056 |
| White-naped Crane | -6185888.294 | 5976418.146 |
| White-naped Crane | -6228226.436 | 5906942.74  |

|                   |              |             |
|-------------------|--------------|-------------|
| White-naped Crane | -6178363.096 | 5932639.43  |
| White-naped Crane | -5382262.871 | 5958252.596 |
| White-naped Crane | -6185888.294 | 5976419.785 |
| White-naped Crane | -5855335.084 | 6304640.216 |
| White-naped Crane | -6178359.756 | 5932644.324 |
| White-naped Crane | -6228225.322 | 5906924.85  |
| White-naped Crane | -5855349.556 | 6304653.852 |
| White-naped Crane | -6185884.954 | 5976434.542 |
| White-naped Crane | -5382263.984 | 5958255.869 |
| White-naped Crane | -6178360.87  | 5932632.905 |
| White-naped Crane | -6228210.851 | 5906923.223 |
| White-naped Crane | -6185880.501 | 5976434.542 |
| White-naped Crane | -5382261.758 | 5958273.866 |
| White-naped Crane | -6228210.851 | 5906921.597 |
| White-naped Crane | -6178363.096 | 5932644.324 |
| White-naped Crane | -6185890.52  | 5976441.1   |
| White-naped Crane | -6228214.19  | 5906929.729 |
| White-naped Crane | -5381901.082 | 5958123.343 |
| White-naped Crane | -6178363.096 | 5932641.061 |
| White-naped Crane | -5381940.044 | 5958126.615 |
| White-naped Crane | -6228213.077 | 5906924.85  |
| White-naped Crane | -5855346.216 | 6304660.67  |
| White-naped Crane | -6185883.841 | 5976462.415 |
| White-naped Crane | -6178364.209 | 5932637.798 |
| White-naped Crane | -5381944.497 | 5958124.979 |
| White-naped Crane | -6228211.964 | 5906924.85  |
| White-naped Crane | -6185888.294 | 5976437.821 |
| White-naped Crane | -6185909.444 | 5976457.496 |
| White-naped Crane | -5855343.99  | 6304653.852 |
| White-naped Crane | -5381951.176 | 5958146.248 |
| White-naped Crane | -6228209.738 | 5906924.85  |
| White-naped Crane | -6178351.964 | 5932650.849 |
| White-naped Crane | -6178599.093 | 5933311.541 |
| White-naped Crane | -5855202.614 | 6304740.782 |
| White-naped Crane | -5382269.55  | 5957949.917 |
| White-naped Crane | -6228205.285 | 5907015.93  |
| White-naped Crane | -6178631.376 | 5933453.474 |
| White-naped Crane | -6189944.776 | 5979778.337 |
| White-naped Crane | -5854492.396 | 6305969.827 |
| White-naped Crane | -6178410.963 | 5933667.194 |
| White-naped Crane | -5381451.352 | 5958192.06  |
| White-naped Crane | -6189961.474 | 5979771.776 |
| White-naped Crane | -6228021.608 | 5907133.034 |
| White-naped Crane | -6189777.797 | 5979686.484 |
| White-naped Crane | -6228011.589 | 5907120.023 |
| White-naped Crane | -6178474.416 | 5933570.938 |
| White-naped Crane | -5858011.205 | 6303428.41  |
| White-naped Crane | -6228002.683 | 5907129.781 |
| White-naped Crane | -6179038.805 | 5933435.529 |
| White-naped Crane | -6189782.249 | 5979678.283 |
| White-naped Crane | -6188067.929 | 5977867.672 |
| White-naped Crane | -6178880.732 | 5933412.689 |
| White-naped Crane | -6228001.57  | 5907100.505 |
| White-naped Crane | -5859156.683 | 6301707.3   |
| White-naped Crane | -6228008.249 | 5907100.505 |
| White-naped Crane | -6190053.869 | 5971612.192 |
| White-naped Crane | -6178911.901 | 5933349.063 |
| White-naped Crane | -6229149.274 | 5906703.659 |

|                   |              |             |
|-------------------|--------------|-------------|
| White-naped Crane | -6178360.87  | 5932641.061 |
| White-naped Crane | -6190027.152 | 5971502.402 |
| White-naped Crane | -6229158.18  | 5906882.563 |
| White-naped Crane | -6178366.436 | 5932639.43  |
| White-naped Crane | -5869256.7   | 6292276.476 |
| White-naped Crane | -6189989.304 | 5971433.578 |
| White-naped Crane | -5869268.945 | 6292296.9   |
| White-naped Crane | -6178158.268 | 5932567.654 |
| White-naped Crane | -6189875.758 | 5971364.755 |
| White-naped Crane | -6189873.531 | 5971254.968 |
| White-naped Crane | -5168063.02  | 6031396.003 |
| White-naped Crane | -6228486.923 | 5906954.125 |
| White-naped Crane | -6178425.435 | 5932654.111 |
| White-naped Crane | -5870919.813 | 6251391.641 |
| White-naped Crane | -6190268.716 | 5971569.587 |
| White-naped Crane | -5168194.377 | 6031384.452 |
| White-naped Crane | -6178364.209 | 5932642.692 |
| White-naped Crane | -6228417.905 | 5906924.85  |
| White-naped Crane | -5167100.106 | 6031298.644 |
| White-naped Crane | -5871033.359 | 6246902.949 |
| White-naped Crane | -6228189.7   | 5907004.545 |
| White-naped Crane | -6178359.756 | 5932636.167 |
| White-naped Crane | -6190300.998 | 5971587.612 |
| White-naped Crane | -5871085.679 | 6246821.697 |
| White-naped Crane | -6189843.475 | 5979686.484 |
| White-naped Crane | -6228111.776 | 5907056.591 |
| White-naped Crane | -6178493.34  | 5932539.923 |
| White-naped Crane | -5167243.708 | 6031300.294 |
| White-naped Crane | -5870767.305 | 6247058.684 |
| White-naped Crane | -6189726.59  | 5979694.686 |
| White-naped Crane | -5166907.524 | 6031476.861 |
| White-naped Crane | -6228211.964 | 5906928.102 |
| White-naped Crane | -6189728.816 | 5979699.606 |
| White-naped Crane | -5164783.548 | 6032117.153 |
| White-naped Crane | -5869678.601 | 6246936.804 |
| White-naped Crane | -6228164.097 | 5907093.999 |
| White-naped Crane | -6178338.606 | 5933349.063 |
| White-naped Crane | -5164865.924 | 6032136.956 |
| White-naped Crane | -6185655.636 | 5976837.893 |
| White-naped Crane | -6178363.096 | 5932645.955 |
| White-naped Crane | -6229088.048 | 5906715.044 |
| White-naped Crane | -5164865.924 | 6032128.705 |
| White-naped Crane | -6185674.56  | 5976841.172 |
| White-naped Crane | -5870713.872 | 6249764.191 |
| White-naped Crane | -6178360.87  | 5932637.798 |
| White-naped Crane | -6229060.219 | 5906664.626 |
| White-naped Crane | -5870716.098 | 6249760.804 |
| White-naped Crane | -5164863.698 | 6032136.956 |
| White-naped Crane | -6178364.209 | 5932641.061 |
| White-naped Crane | -6229061.332 | 5906671.131 |
| White-naped Crane | -6185587.731 | 5976842.812 |
| White-naped Crane | -5164727.888 | 6032032.988 |
| White-naped Crane | -5870717.212 | 6249770.964 |
| White-naped Crane | -6178365.322 | 5932639.43  |
| White-naped Crane | -6229063.558 | 5906672.758 |
| White-naped Crane | -6185510.921 | 5976688.683 |
| White-naped Crane | -5870716.098 | 6249772.657 |
| White-naped Crane | -6185963.991 | 5976613.26  |

|                   |              |             |
|-------------------|--------------|-------------|
| White-naped Crane | -5164729.001 | 6032031.338 |
| White-naped Crane | -6229061.332 | 5906676.011 |
| White-naped Crane | -6178365.322 | 5932631.273 |
| White-naped Crane | -5870690.495 | 6249760.804 |
| White-naped Crane | -5164735.68  | 6032028.037 |
| White-naped Crane | -6229064.671 | 5906674.384 |
| White-naped Crane | -6178359.756 | 5932637.798 |
| White-naped Crane | -6185975.123 | 5976608.341 |
| White-naped Crane | -6185968.444 | 5976600.143 |
| White-naped Crane | -5870716.098 | 6249767.577 |
| White-naped Crane | -6229078.03  | 5906667.879 |
| White-naped Crane | -5164753.491 | 6032024.736 |
| White-naped Crane | -6178364.209 | 5932629.642 |
| White-naped Crane | -5870716.098 | 6249770.964 |
| White-naped Crane | -6185965.104 | 5976605.062 |
| White-naped Crane | -5164736.793 | 6032024.736 |
| White-naped Crane | -6178363.096 | 5932639.43  |
| White-naped Crane | -6229060.219 | 5906671.131 |
| White-naped Crane | -5870887.531 | 6249708.311 |
| White-naped Crane | -6185889.407 | 5976557.512 |
| White-naped Crane | -6229218.292 | 5906728.055 |
| White-naped Crane | -6178255.116 | 5932944.483 |
| White-naped Crane | -5871161.376 | 6248912.488 |
| White-naped Crane | -6188038.986 | 5977874.231 |
| White-naped Crane | -6178142.683 | 5933350.695 |
| White-naped Crane | -5167783.608 | 6031476.861 |
| White-naped Crane | -6177817.631 | 5933433.897 |
| White-naped Crane | -6225848.651 | 5905043.284 |
| White-naped Crane | -6189938.097 | 5979666.802 |
| White-naped Crane | -6227950.363 | 5907120.023 |
| White-naped Crane | -6177684.047 | 5933078.254 |
| White-naped Crane | -5871070.094 | 6248882.011 |
| White-naped Crane | -6189162.2   | 5972379.129 |
| White-naped Crane | -6189036.409 | 5972229.997 |
| White-naped Crane | -6228000.457 | 5907110.264 |
| White-naped Crane | -5871231.508 | 6250477.114 |
| White-naped Crane | -6178361.983 | 5932645.955 |
| White-naped Crane | -5151690.149 | 6032174.913 |
| White-naped Crane | -5870995.51  | 6250367.039 |
| White-naped Crane | -6228206.398 | 5907002.918 |
| White-naped Crane | -6178361.983 | 5932649.217 |
| White-naped Crane | -6188874.996 | 5971949.767 |
| White-naped Crane | -5870943.19  | 6251511.891 |
| White-naped Crane | -6228147.399 | 5907077.735 |
| White-naped Crane | -6189257.935 | 5972198.86  |
| White-naped Crane | -6178297.418 | 5932479.566 |
| White-naped Crane | -5870958.775 | 6251488.18  |
| White-naped Crane | -6189538.46  | 5972395.517 |
| White-naped Crane | -6178498.906 | 5932445.31  |
| White-naped Crane | -5151622.244 | 6029376.448 |
| White-naped Crane | -6228018.268 | 5907126.528 |
| White-naped Crane | -6228134.04  | 5907111.89  |
| White-naped Crane | -5155259.052 | 6027688.902 |
| White-naped Crane | -5870907.568 | 6251503.423 |
| White-naped Crane | -6178358.643 | 5932530.135 |
| White-naped Crane | -6189312.481 | 5972157.89  |
| White-naped Crane | -6189203.388 | 5972298.827 |
| White-naped Crane | -5167809.211 | 6031628.678 |



|                   |              |             |
|-------------------|--------------|-------------|
| White-naped Crane | -5870928.719 | 6251500.036 |
| White-naped Crane | -6178366.436 | 5932634.536 |
| White-naped Crane | -6228136.267 | 5907108.637 |
| White-naped Crane | -5870938.737 | 6251488.18  |
| White-naped Crane | -5167769.136 | 6030902.62  |
| White-naped Crane | -6189250.142 | 5972388.962 |
| White-naped Crane | -6228268.737 | 5906985.027 |
| White-naped Crane | -6178359.756 | 5932647.586 |
| White-naped Crane | -5870958.775 | 6251472.937 |
| White-naped Crane | -5167252.614 | 6028780.903 |
| White-naped Crane | -6228173.002 | 5907095.626 |
| White-naped Crane | -6178370.888 | 5932659.005 |
| White-naped Crane | -6187383.314 | 5975229.52  |
| White-naped Crane | -6187250.844 | 5975239.356 |
| White-naped Crane | -5871035.585 | 6248951.431 |
| White-naped Crane | -6228012.702 | 5907155.805 |
| White-naped Crane | -5168242.244 | 6033678.477 |
| White-naped Crane | -6178927.486 | 5933353.958 |
| White-naped Crane | -5167506.422 | 6031674.884 |
| White-naped Crane | -6228148.512 | 5907058.217 |
| White-naped Crane | -6179035.466 | 5933114.144 |
| White-naped Crane | -5870702.74  | 6249745.564 |
| White-naped Crane | -6187246.391 | 5975616.42  |
| White-naped Crane | -6187282.014 | 5975518.054 |
| White-naped Crane | -5167697.892 | 6031361.35  |
| White-naped Crane | -6179055.503 | 5933502.417 |
| White-naped Crane | -6228210.851 | 5907074.482 |
| White-naped Crane | -5870236.311 | 6250202.775 |
| White-naped Crane | -6187265.316 | 5975375.425 |
| White-naped Crane | -5167977.304 | 6031382.802 |
| White-naped Crane | -6228176.342 | 5906991.533 |
| White-naped Crane | -6178237.305 | 5933559.518 |
| White-naped Crane | -5167975.077 | 6031480.161 |
| White-naped Crane | -6178363.096 | 5932644.324 |
| White-naped Crane | -6186184.403 | 5975796.761 |
| White-naped Crane | -5870739.476 | 6249754.031 |
| White-naped Crane | -6228223.096 | 5907063.097 |
| White-naped Crane | -5167973.964 | 6031490.063 |
| White-naped Crane | -5870732.796 | 6249770.964 |
| White-naped Crane | -6228139.606 | 5907097.252 |
| White-naped Crane | -6178359.756 | 5932642.692 |
| White-naped Crane | -6186174.385 | 5975767.25  |
| White-naped Crane | -5870730.57  | 6249765.884 |
| White-naped Crane | -6186140.989 | 5975706.59  |
| White-naped Crane | -5167956.153 | 6031485.112 |
| White-naped Crane | -6228130.701 | 5907084.241 |
| White-naped Crane | -6178367.549 | 5932644.324 |
| White-naped Crane | -5167963.945 | 6031486.762 |
| White-naped Crane | -5870729.457 | 6249769.271 |
| White-naped Crane | -6228128.474 | 5907089.12  |
| White-naped Crane | -6186149.894 | 5975703.311 |
| White-naped Crane | -6178355.304 | 5932636.167 |
| White-naped Crane | -5870736.136 | 6249776.044 |
| White-naped Crane | -6186154.347 | 5975704.95  |
| White-naped Crane | -5167962.832 | 6031485.112 |
| White-naped Crane | -6228139.606 | 5907089.12  |
| White-naped Crane | -6178365.322 | 5932634.536 |
| White-naped Crane | -6186130.97  | 5975785.284 |

|                   |              |             |
|-------------------|--------------|-------------|
| White-naped Crane | -5167956.153 | 6031523.066 |
| White-naped Crane | -5870749.494 | 6249781.124 |
| White-naped Crane | -6228127.361 | 5907093.999 |
| White-naped Crane | -6178373.115 | 5932650.849 |
| White-naped Crane | -6186155.46  | 5975709.869 |
| White-naped Crane | -5870736.136 | 6249776.044 |
| White-naped Crane | -6228130.701 | 5907089.12  |
| White-naped Crane | -5167960.606 | 6031486.762 |
| White-naped Crane | -6178390.926 | 5932642.692 |
| White-naped Crane | -6186151.008 | 5975708.229 |
| White-naped Crane | -5870704.967 | 6249750.644 |
| White-naped Crane | -5167946.134 | 6031514.815 |
| White-naped Crane | -6228116.229 | 5907098.879 |
| White-naped Crane | -6178364.209 | 5932637.798 |
| White-naped Crane | -5870856.361 | 6249726.938 |
| White-naped Crane | -6187171.807 | 5975460.674 |
| White-naped Crane | -5167109.012 | 6031100.63  |
| White-naped Crane | -6178441.02  | 5932996.686 |
| White-naped Crane | -6189778.91  | 5979684.844 |
| White-naped Crane | -5167093.427 | 6031917.469 |
| White-naped Crane | -5870305.33  | 6250243.417 |
| White-naped Crane | -6225996.706 | 5905332.729 |
| White-naped Crane | -6178434.341 | 5933629.67  |
| White-naped Crane | -6226081.309 | 5905342.485 |
| White-naped Crane | -5167504.196 | 6031953.775 |
| White-naped Crane | -6178376.454 | 5933645.985 |
| White-naped Crane | -5870885.304 | 6251733.767 |
| White-naped Crane | -6189098.748 | 5979082.904 |
| White-naped Crane | -5167524.233 | 6031950.474 |
| White-naped Crane | -6225849.764 | 5905324.598 |
| White-naped Crane | -6178009.1   | 5933507.312 |
| White-naped Crane | -6189804.513 | 5979737.331 |
| White-naped Crane | -6225755.143 | 5905155.483 |
| White-naped Crane | -5871196.999 | 6252619.635 |
| White-naped Crane | -6226721.396 | 5904804.255 |
| White-naped Crane | -5149958.018 | 5954094.548 |
| White-naped Crane | -6178163.834 | 5932645.955 |
| White-naped Crane | -6189796.721 | 5971721.985 |
| White-naped Crane | -5904204.341 | 6221371.148 |
| White-naped Crane | -6228240.907 | 5906955.752 |
| White-naped Crane | -6189683.175 | 5971613.831 |
| White-naped Crane | -6178357.53  | 5932637.798 |
| White-naped Crane | -5150932.063 | 5953438.8   |
| White-naped Crane | -5151191.438 | 5953662.828 |
| White-naped Crane | -6228312.152 | 5906941.114 |
| White-naped Crane | -6178373.115 | 5932639.43  |
| White-naped Crane | -6228158.531 | 5907025.688 |
| White-naped Crane | -6190139.585 | 5971594.167 |
| White-naped Crane | -6189734.382 | 5971251.69  |
| White-naped Crane | -6228177.455 | 5906993.16  |
| White-naped Crane | -5161928.203 | 5946101.431 |
| White-naped Crane | -6177945.648 | 5932740.569 |
| White-naped Crane | -5161933.769 | 5946065.487 |
| White-naped Crane | -6228208.624 | 5907040.326 |
| White-naped Crane | -6189743.288 | 5979724.21  |
| White-naped Crane | -6177046.186 | 5931510.661 |
| White-naped Crane | -6189737.722 | 5979714.368 |
| White-naped Crane | -5162029.503 | 5946219.067 |

|                   |              |             |
|-------------------|--------------|-------------|
| White-naped Crane | -6177031.715 | 5931491.089 |
| White-naped Crane | -6227954.816 | 5907110.264 |
| White-naped Crane | -6189734.382 | 5979702.887 |
| White-naped Crane | -6228179.681 | 5906991.533 |
| White-naped Crane | -6055230.381 | 6294259.504 |
| White-naped Crane | -5161913.731 | 5946060.585 |
| White-naped Crane | -6178366.436 | 5932634.536 |
| White-naped Crane | -6055346.153 | 6294205.028 |
| White-naped Crane | -6178366.436 | 5932636.167 |
| White-naped Crane | -5161920.41  | 5946045.881 |
| White-naped Crane | -6228472.452 | 5907090.746 |
| White-naped Crane | -6189745.514 | 5979684.844 |
| White-naped Crane | -5161879.222 | 5946060.585 |
| White-naped Crane | -6189738.835 | 5979679.924 |
| White-naped Crane | -6228178.568 | 5906988.28  |
| White-naped Crane | -6178369.775 | 5932655.742 |
| White-naped Crane | -6054588.067 | 6293874.776 |
| White-naped Crane | -5161899.26  | 5946073.656 |
| White-naped Crane | -6228180.795 | 5906983.401 |
| White-naped Crane | -6189133.257 | 5979091.105 |
| White-naped Crane | -6178367.549 | 5932649.217 |
| White-naped Crane | -6055149.118 | 6294433.147 |
| White-naped Crane | -6186069.744 | 5976903.48  |
| White-naped Crane | -5161899.26  | 5946065.487 |
| White-naped Crane | -6178363.096 | 5932641.061 |
| White-naped Crane | -6228199.719 | 5907009.424 |
| White-naped Crane | -6055146.891 | 6294412.718 |
| White-naped Crane | -6186067.518 | 5976898.561 |
| White-naped Crane | -5161904.826 | 5946065.487 |
| White-naped Crane | -6178363.096 | 5932639.43  |
| White-naped Crane | -6228190.813 | 5906999.665 |
| White-naped Crane | -6186051.933 | 5976655.89  |
| White-naped Crane | -5161904.826 | 5946081.825 |
| White-naped Crane | -6055158.023 | 6294414.421 |
| White-naped Crane | -6228134.04  | 5907092.373 |
| White-naped Crane | -6055149.118 | 6294419.528 |
| White-naped Crane | -6185912.784 | 5976542.756 |
| White-naped Crane | -5161904.826 | 5946075.29  |
| White-naped Crane | -6228129.588 | 5907097.252 |
| White-naped Crane | -6178357.53  | 5932659.005 |
| White-naped Crane | -6185911.671 | 5976542.756 |
| White-naped Crane | -5161902.599 | 5946080.191 |
| White-naped Crane | -6228132.927 | 5907098.879 |
| White-naped Crane | -6055159.136 | 6294404.206 |
| White-naped Crane | -6178361.983 | 5932645.955 |
| White-naped Crane | -6185915.01  | 5976509.963 |
| White-naped Crane | -5161902.599 | 5946080.191 |
| White-naped Crane | -6228134.04  | 5907097.252 |
| White-naped Crane | -6055151.344 | 6294404.206 |
| White-naped Crane | -6178367.549 | 5932644.324 |
| White-naped Crane | -6055160.25  | 6294402.504 |
| White-naped Crane | -6186010.745 | 5975796.761 |
| White-naped Crane | -5161914.844 | 5946076.924 |
| White-naped Crane | -6228137.38  | 5907051.712 |
| White-naped Crane | -6178384.247 | 5932632.905 |
| White-naped Crane | -6055148.004 | 6294402.504 |
| White-naped Crane | -6186005.179 | 5975795.121 |
| White-naped Crane | -6228132.927 | 5907095.626 |

|                   |              |             |
|-------------------|--------------|-------------|
| White-naped Crane | -6178364.209 | 5932639.43  |
| White-naped Crane | -6186008.519 | 5975668.882 |
| White-naped Crane | -6228127.361 | 5907084.241 |
| White-naped Crane | -6178310.776 | 5932479.566 |
| White-naped Crane | -5162030.617 | 5946364.481 |
| White-naped Crane | -6228215.304 | 5907056.591 |
| White-naped Crane | -6054515.71  | 6294342.92  |
| White-naped Crane | -6188080.174 | 5977982.464 |
| White-naped Crane | -6177728.575 | 5932611.698 |
| White-naped Crane | -6226032.328 | 5905205.892 |
| White-naped Crane | -5162570.516 | 5949399.122 |
| White-naped Crane | -6055476.397 | 6294594.878 |
| White-naped Crane | -6188069.042 | 5977982.464 |
| White-naped Crane | -6055390.681 | 6294691.917 |
| White-naped Crane | -6189944.776 | 5979781.618 |
| White-naped Crane | -5162343.424 | 5949538.052 |
| White-naped Crane | -6226175.931 | 5905205.892 |
| White-naped Crane | -5162019.485 | 5949779.958 |
| White-naped Crane | -6227145.523 | 5904692.06  |
| White-naped Crane | -6177583.86  | 5933314.804 |
| White-naped Crane | -6055219.249 | 6294215.242 |
| White-naped Crane | -6189775.57  | 5979671.722 |
| White-naped Crane | -6055200.325 | 6294254.396 |
| White-naped Crane | -6227038.657 | 5904661.166 |
| White-naped Crane | -6178346.398 | 5933526.889 |
| White-naped Crane | -6189102.087 | 5979099.305 |
| White-naped Crane | -6226908.413 | 5904659.54  |
| White-naped Crane | -6054686.029 | 6293983.724 |
| White-naped Crane | -6178423.209 | 5933371.903 |
| White-naped Crane | -6054868.593 | 6293871.372 |
| White-naped Crane | -6189121.012 | 5979097.665 |
| White-naped Crane | -6227097.656 | 5904563.607 |
| White-naped Crane | -6177995.742 | 5933608.461 |
| White-naped Crane | -6054856.347 | 6293881.586 |
| White-naped Crane | -6178035.817 | 5933641.091 |
| White-naped Crane | -6189995.983 | 5979712.728 |
| White-naped Crane | -5277427.74  | 5876199.425 |
| White-naped Crane | -6189227.878 | 5979962.046 |
| White-naped Crane | -6226498.757 | 5904693.686 |
| White-naped Crane | -6177960.119 | 5933699.824 |
| White-naped Crane | -6054740.575 | 6293789.662 |
| White-naped Crane | -6189280.198 | 5979924.32  |
| White-naped Crane | -5276993.594 | 5875919.056 |
| White-naped Crane | -6178118.193 | 5933711.244 |
| White-naped Crane | -6054870.819 | 6293888.395 |
| White-naped Crane | -6189232.331 | 5979970.247 |
| White-naped Crane | -5276502.675 | 5875990.363 |
| White-naped Crane | -6228136.267 | 5907103.758 |
| White-naped Crane | -6054857.461 | 6293878.181 |
| White-naped Crane | -6189475.008 | 5979794.74  |
| White-naped Crane | -5276473.732 | 5875975.777 |
| White-naped Crane | -6177788.687 | 5933393.112 |
| White-naped Crane | -6189578.535 | 5979789.819 |
| White-naped Crane | -5274142.702 | 5877757.019 |
| White-naped Crane | -6054878.611 | 6293830.517 |
| White-naped Crane | -5274127.117 | 5877758.64  |
| White-naped Crane | -6226045.687 | 5905204.266 |
| White-naped Crane | -5273124.129 | 5877132.976 |

|                   |              |             |
|-------------------|--------------|-------------|
| White-naped Crane | -6055712.394 | 6293243.25  |
| White-naped Crane | -6178383.134 | 5931575.904 |
| White-naped Crane | -6228191.926 | 5907012.677 |
| White-naped Crane | -6185651.183 | 5976942.833 |
| White-naped Crane | -6055185.853 | 6294237.373 |
| White-naped Crane | -6178808.374 | 5930279.298 |
| White-naped Crane | -5273100.752 | 5877108.663 |
| White-naped Crane | -6228229.775 | 5907037.074 |
| White-naped Crane | -6185622.24  | 5976926.436 |
| White-naped Crane | -5272940.452 | 5876998.448 |
| White-naped Crane | -6178806.148 | 5930276.036 |
| White-naped Crane | -6185628.919 | 5976911.678 |
| White-naped Crane | -6055190.306 | 6294249.289 |
| White-naped Crane | -6228129.588 | 5907087.493 |
| White-naped Crane | -6185626.693 | 5976918.237 |
| White-naped Crane | -5272939.338 | 5877008.172 |
| White-naped Crane | -6055196.985 | 6294233.968 |
| White-naped Crane | -6228130.701 | 5907090.746 |
| White-naped Crane | -5272938.225 | 5877011.414 |
| White-naped Crane | -6055199.211 | 6294245.885 |
| White-naped Crane | -6185618.9   | 5976916.597 |
| White-naped Crane | -6228136.267 | 5907093.999 |
| White-naped Crane | -6178791.676 | 5930285.821 |
| White-naped Crane | -6055199.211 | 6294266.313 |
| White-naped Crane | -6185613.334 | 5976926.436 |
| White-naped Crane | -5272850.283 | 5877056.797 |
| White-naped Crane | -6228136.267 | 5907095.626 |
| White-naped Crane | -6178806.148 | 5930284.191 |
| White-naped Crane | -6185575.486 | 5976852.65  |
| White-naped Crane | -5272845.83  | 5877056.797 |
| White-naped Crane | -6228138.493 | 5907092.373 |
| White-naped Crane | -6055201.438 | 6294216.944 |
| White-naped Crane | -6178799.468 | 5930277.667 |
| White-naped Crane | -6185594.41  | 5976839.532 |
| White-naped Crane | -6055202.551 | 6294244.182 |
| White-naped Crane | -5272864.754 | 5877058.418 |
| White-naped Crane | -6228138.493 | 5907087.493 |
| White-naped Crane | -6178815.053 | 5930271.144 |
| White-naped Crane | -6055240.4   | 6294240.777 |
| White-naped Crane | -6228135.154 | 5907087.493 |
| White-naped Crane | -5272853.622 | 5877056.797 |
| White-naped Crane | -6185574.373 | 5976847.731 |
| White-naped Crane | -6178802.808 | 5930284.191 |
| White-naped Crane | -6228034.966 | 5907129.781 |
| White-naped Crane | -5274364.228 | 5877672.73  |
| White-naped Crane | -6054601.426 | 6294007.556 |
| White-naped Crane | -6178929.712 | 5929408.48  |
| White-naped Crane | -6187180.713 | 5978120.216 |
| White-naped Crane | -6055909.43  | 6295985.887 |
| White-naped Crane | -5274595.773 | 5877734.326 |
| White-naped Crane | -6225840.859 | 5905290.449 |
| White-naped Crane | -6050661.829 | 6296239.597 |
| White-naped Crane | -5274217.286 | 5877429.593 |
| White-naped Crane | -6225928.801 | 5905251.423 |
| White-naped Crane | -6178056.967 | 5932632.905 |
| White-naped Crane | -6189940.323 | 5979788.179 |
| White-naped Crane | -6049390.56  | 6297785.861 |
| White-naped Crane | -6226158.119 | 5904895.313 |

|                   |              |             |
|-------------------|--------------|-------------|
| White-naped Crane | -6188047.892 | 5977872.591 |
| White-naped Crane | -6188043.439 | 5977864.392 |
| White-naped Crane | -5274433.246 | 5877089.213 |
| White-naped Crane | -6226316.193 | 5905041.657 |
| White-naped Crane | -6178367.549 | 5932637.798 |
| White-naped Crane | -6049125.62  | 6298949.154 |
| White-naped Crane | -6048792.775 | 6300761.693 |
| White-naped Crane | -5274394.284 | 5877077.868 |
| White-naped Crane | -6227164.448 | 5904653.036 |
| White-naped Crane | -6177891.101 | 5932089.708 |
| White-naped Crane | -6187897.61  | 5977900.469 |
| White-naped Crane | -6188063.476 | 5977877.511 |
| White-naped Crane | -6046573.064 | 6304814.076 |
| White-naped Crane | -6178366.436 | 5932644.324 |
| White-naped Crane | -5273373.485 | 5877186.463 |
| White-naped Crane | -6227154.429 | 5904653.036 |
| White-naped Crane | -6227170.014 | 5904649.784 |
| White-naped Crane | -6178364.209 | 5932654.111 |
| White-naped Crane | -6046706.647 | 6304877.144 |
| White-naped Crane | -6190366.677 | 5971792.449 |
| White-naped Crane | -6227180.032 | 5904877.426 |
| White-naped Crane | -6047357.866 | 6304667.488 |
| White-naped Crane | -5274693.734 | 5877852.656 |
| White-naped Crane | -6177862.158 | 5932019.568 |
| White-naped Crane | -6190272.055 | 5971744.926 |
| White-naped Crane | -5491254.671 | 5877462.011 |
| White-naped Crane | -5273944.553 | 5877791.059 |
| White-naped Crane | -6050078.515 | 6302112.837 |
| White-naped Crane | -6190296.545 | 5971797.365 |
| White-naped Crane | -6178358.643 | 5932645.955 |
| White-naped Crane | -6227177.806 | 5904890.434 |
| White-naped Crane | -6227377.068 | 5904913.199 |
| White-naped Crane | -6178149.363 | 5932882.493 |
| White-naped Crane | -5273706.33  | 5877068.143 |
| White-naped Crane | -6050080.741 | 6302085.573 |
| White-naped Crane | -5492200.887 | 5877970.988 |
| White-naped Crane | -5273584.992 | 5876348.527 |
| White-naped Crane | -6227736.63  | 5904987.997 |
| White-naped Crane | -6189108.766 | 5979114.066 |
| White-naped Crane | -6177904.46  | 5933163.085 |
| White-naped Crane | -6050035.1   | 6302133.284 |
| White-naped Crane | -6225433.43  | 5905015.64  |
| White-naped Crane | -5272536.362 | 5875914.194 |
| White-naped Crane | -6050009.497 | 6302180.996 |
| White-naped Crane | -6189162.2   | 5979097.665 |
| White-naped Crane | -6177679.594 | 5933091.305 |
| White-naped Crane | -6048825.057 | 6304057.3   |
| White-naped Crane | -6225349.94  | 5905257.927 |
| White-naped Crane | -6189941.436 | 5979748.813 |
| White-naped Crane | -5274330.832 | 5877836.446 |
| White-naped Crane | -5492167.491 | 5877938.568 |
| White-naped Crane | -6048761.605 | 6303980.604 |
| White-naped Crane | -6190049.416 | 5979722.569 |
| White-naped Crane | -5492163.038 | 5877927.221 |
| White-naped Crane | -5272924.867 | 5876604.6   |
| White-naped Crane | -6225225.262 | 5905322.972 |
| White-naped Crane | -6177744.16  | 5933125.563 |
| White-naped Crane | -6185555.448 | 5976851.01  |

|                   |              |             |
|-------------------|--------------|-------------|
| White-naped Crane | -5492194.208 | 5877962.883 |
| White-naped Crane | -6048840.642 | 6304091.388 |
| White-naped Crane | -6178369.775 | 5932647.586 |
| White-naped Crane | -6226567.775 | 5904682.304 |
| White-naped Crane | -5492189.755 | 5877956.399 |
| White-naped Crane | -6185553.222 | 5976854.289 |
| White-naped Crane | -5272872.547 | 5876622.428 |
| White-naped Crane | -6178368.662 | 5932645.955 |
| White-naped Crane | -6185543.203 | 5976849.37  |
| White-naped Crane | -5492189.755 | 5877954.778 |
| White-naped Crane | -6178359.756 | 5932632.905 |
| White-naped Crane | -5272667.719 | 5876606.221 |
| White-naped Crane | -6048559.004 | 6304074.344 |
| White-naped Crane | -6227154.429 | 5904487.186 |
| White-naped Crane | -6048567.909 | 6304094.796 |
| White-naped Crane | -6185542.09  | 5976849.37  |
| White-naped Crane | -5272526.343 | 5876487.908 |
| White-naped Crane | -5492191.981 | 5877953.157 |
| White-naped Crane | -6227121.033 | 5904480.682 |
| White-naped Crane | -6178361.983 | 5932642.692 |
| White-naped Crane | -6185546.543 | 5976844.451 |
| White-naped Crane | -5272519.664 | 5876491.149 |
| White-naped Crane | -5492189.755 | 5877956.399 |
| White-naped Crane | -6048554.551 | 6304087.979 |
| White-naped Crane | -6178363.096 | 5932649.217 |
| White-naped Crane | -6227277.993 | 5904708.32  |
| White-naped Crane | -6048565.683 | 6304122.066 |
| White-naped Crane | -6185543.203 | 5976859.208 |
| White-naped Crane | -5492183.076 | 5877954.778 |
| White-naped Crane | -5272525.23  | 5876491.149 |
| White-naped Crane | -6227361.483 | 5904892.06  |
| White-naped Crane | -6178365.322 | 5932642.692 |
| White-naped Crane | -6048533.4   | 6304106.727 |
| White-naped Crane | -6185547.656 | 5976846.091 |
| White-naped Crane | -5492180.849 | 5877946.673 |
| White-naped Crane | -5272536.362 | 5876496.011 |
| White-naped Crane | -6227363.709 | 5904892.06  |
| White-naped Crane | -6178367.549 | 5932641.061 |
| White-naped Crane | -6185543.203 | 5976852.65  |
| White-naped Crane | -5492183.076 | 5877951.536 |
| White-naped Crane | -6227362.596 | 5904882.304 |
| White-naped Crane | -5272528.57  | 5876494.391 |
| White-naped Crane | -6048533.4   | 6304087.979 |
| White-naped Crane | -6178367.549 | 5932649.217 |
| White-naped Crane | -6048526.721 | 6304091.388 |
| White-naped Crane | -6185546.543 | 5976851.01  |
| White-naped Crane | -5272530.796 | 5876491.149 |
| White-naped Crane | -5492180.849 | 5877946.673 |
| White-naped Crane | -6227363.709 | 5904883.93  |
| White-naped Crane | -6178356.417 | 5932655.742 |
| White-naped Crane | -5492169.717 | 5877911.011 |
| White-naped Crane | -5277785.076 | 5876633.773 |
| White-naped Crane | -6227171.127 | 5904879.052 |
| White-naped Crane | -6185599.976 | 5976860.848 |
| White-naped Crane | -6178355.304 | 5932637.798 |
| White-naped Crane | -5490758.186 | 5876779.641 |
| White-naped Crane | -6225531.391 | 5905256.301 |
| White-naped Crane | -5277937.584 | 5875957.951 |

|                   |              |             |
|-------------------|--------------|-------------|
| White-naped Crane | -6177453.616 | 5931911.912 |
| White-naped Crane | -6048186.083 | 6304832.826 |
| White-naped Crane | -5490802.714 | 5876842.851 |
| White-naped Crane | -6225276.469 | 5905279.067 |
| White-naped Crane | -6177829.876 | 5931969.002 |
| White-naped Crane | -5277932.018 | 5875867.197 |
| White-naped Crane | -6048351.95  | 6303799.944 |
| White-naped Crane | -5491492.895 | 5877395.555 |
| White-naped Crane | -6225067.188 | 5905410.783 |
| White-naped Crane | -5277893.056 | 5875841.267 |
| White-naped Crane | -6178368.662 | 5932657.374 |
| White-naped Crane | -6185595.523 | 5976862.488 |
| White-naped Crane | -5491490.668 | 5877392.313 |
| White-naped Crane | -5279253.38  | 5875708.379 |
| White-naped Crane | -6227065.373 | 5904500.194 |
| White-naped Crane | -6055465.265 | 6294749.801 |
| White-naped Crane | -6178364.209 | 5932639.43  |
| White-naped Crane | -6055474.171 | 6294700.429 |
| White-naped Crane | -5491490.668 | 5877390.692 |
| White-naped Crane | -5281069.001 | 5874047.456 |
| White-naped Crane | -6227171.127 | 5904501.82  |
| White-naped Crane | -5281035.605 | 5874049.077 |
| White-naped Crane | -6054947.629 | 6294097.78  |
| White-naped Crane | -5491499.574 | 5877387.45  |
| White-naped Crane | -5490386.379 | 5876862.301 |
| White-naped Crane | -6227079.845 | 5905093.692 |
| White-naped Crane | -6054968.78  | 6294097.78  |
| White-naped Crane | -6177891.101 | 5932071.765 |
| White-naped Crane | -5281102.397 | 5873844.927 |
| White-naped Crane | -6185587.731 | 5976855.929 |
| White-naped Crane | -5490326.267 | 5876713.19  |
| White-naped Crane | -5281070.114 | 5873885.432 |
| White-naped Crane | -6227943.684 | 5907107.011 |
| White-naped Crane | -6177488.125 | 5933247.917 |
| White-naped Crane | -5490341.851 | 5876675.913 |
| White-naped Crane | -6001856.025 | 6303605.653 |
| White-naped Crane | -5281022.247 | 5874023.153 |
| White-naped Crane | -6177690.726 | 5933112.512 |
| White-naped Crane | -6185594.41  | 5976849.37  |
| White-naped Crane | -6227165.561 | 5904518.079 |
| White-naped Crane | -5491909.23  | 5876812.056 |
| White-naped Crane | -6227050.902 | 5904470.926 |
| White-naped Crane | -5281018.907 | 5874039.355 |
| White-naped Crane | -6185587.731 | 5976867.407 |
| White-naped Crane | -6226535.492 | 5904911.573 |
| White-naped Crane | -5281011.115 | 5874055.558 |
| White-naped Crane | -5491884.739 | 5876813.677 |
| White-naped Crane | -6177331.164 | 5933185.924 |
| White-naped Crane | -5942123.099 | 6301438.089 |
| White-naped Crane | -5492895.52  | 5881030.337 |
| White-naped Crane | -6178363.096 | 5932624.748 |
| White-naped Crane | -6185613.334 | 5976906.759 |
| White-naped Crane | -5493111.48  | 5880954.124 |
| White-naped Crane | -6227324.748 | 5904662.792 |
| White-naped Crane | -6178359.756 | 5932641.061 |
| White-naped Crane | -5278044.45  | 5875726.206 |
| White-naped Crane | -5277053.707 | 5876870.405 |
| White-naped Crane | -5894763.335 | 6265686.485 |



|                   |              |             |
|-------------------|--------------|-------------|
| White-naped Crane | -5493164.914 | 5880929.801 |
| White-naped Crane | -6178359.756 | 5932641.061 |
| White-naped Crane | -6227259.069 | 5904812.385 |
| White-naped Crane | -5277044.801 | 5876980.619 |
| White-naped Crane | -5492876.596 | 5880952.503 |
| White-naped Crane | -6178330.813 | 5932632.905 |
| White-naped Crane | -6226199.308 | 5905109.953 |
| White-naped Crane | -5870708.306 | 6249606.712 |
| White-naped Crane | -5277060.386 | 5876962.79  |
| White-naped Crane | -6228140.72  | 5907095.626 |
| White-naped Crane | -6178369.775 | 5932645.955 |
| White-naped Crane | -5870798.475 | 6248876.932 |
| White-naped Crane | -5277052.594 | 5876974.135 |
| White-naped Crane | -6178363.096 | 5932637.798 |
| White-naped Crane | -6228134.04  | 5907087.493 |
| White-naped Crane | -6185614.448 | 5976887.083 |
| White-naped Crane | -5870802.928 | 6248854.921 |
| White-naped Crane | -6185589.957 | 5976865.767 |
| White-naped Crane | -5277048.141 | 5876967.652 |
| White-naped Crane | -6228144.059 | 5907097.252 |
| White-naped Crane | -6178364.209 | 5932641.061 |
| White-naped Crane | -6185586.618 | 5976877.245 |
| White-naped Crane | -5277041.462 | 5876987.102 |
| White-naped Crane | -5870787.343 | 6248887.091 |
| White-naped Crane | -6178361.983 | 5932644.324 |
| White-naped Crane | -6228010.476 | 5907100.505 |
| White-naped Crane | -5277042.575 | 5876985.481 |
| White-naped Crane | -6178361.983 | 5932642.692 |
| White-naped Crane | -6228129.588 | 5907095.626 |
| White-naped Crane | -6185587.731 | 5976864.127 |
| White-naped Crane | -6228140.72  | 5907107.011 |
| White-naped Crane | -6178363.096 | 5932642.692 |
| White-naped Crane | -5277044.801 | 5876991.964 |
| White-naped Crane | -5870746.155 | 6249000.533 |
| White-naped Crane | -5870740.589 | 6249002.226 |
| White-naped Crane | -6178364.209 | 5932641.061 |
| White-naped Crane | -5277044.801 | 5876982.239 |
| White-naped Crane | -6228141.833 | 5907095.626 |
| White-naped Crane | -5492911.105 | 5880876.29  |
| White-naped Crane | -5870746.155 | 6248988.681 |
| White-naped Crane | -6178365.322 | 5932639.43  |
| White-naped Crane | -5277088.216 | 5877021.139 |
| White-naped Crane | -5492909.992 | 5880873.047 |
| White-naped Crane | -6228138.493 | 5907095.626 |
| White-naped Crane | -5277906.414 | 5875991.984 |
| White-naped Crane | -6228166.323 | 5907053.338 |
| White-naped Crane | -6177802.046 | 5932104.388 |
| White-naped Crane | -5496915.267 | 5876620.807 |
| White-naped Crane | -5870857.474 | 6249732.018 |
| White-naped Crane | -5278013.281 | 5876421.459 |
| White-naped Crane | -6177289.976 | 5933412.689 |
| White-naped Crane | -6177377.919 | 5933432.266 |
| White-naped Crane | -5870643.741 | 6246176.79  |
| White-naped Crane | -6225679.446 | 5904841.653 |
| White-naped Crane | -5280228.539 | 5880736.839 |
| White-naped Crane | -5492908.879 | 5880869.804 |
| White-naped Crane | -5870635.948 | 6246159.864 |
| White-naped Crane | -5276931.255 | 5877102.18  |

|                   |              |             |
|-------------------|--------------|-------------|
| White-naped Crane | -6177327.825 | 5933208.763 |
| White-naped Crane | -5493292.931 | 5880936.287 |
| White-naped Crane | -5492950.067 | 5880887.641 |
| White-naped Crane | -5870908.681 | 6244374.358 |
| White-naped Crane | -6227961.495 | 5907110.264 |
| White-naped Crane | -5871119.075 | 6244323.591 |
| White-naped Crane | -5281882.746 | 5872631.467 |
| White-naped Crane | -6178366.436 | 5932639.43  |
| White-naped Crane | -6229197.142 | 5906837.023 |
| White-naped Crane | -5492993.482 | 5879820.736 |
| White-naped Crane | -5493076.971 | 5879890.453 |
| White-naped Crane | -5871160.263 | 6244325.283 |
| White-naped Crane | -5870709.419 | 6245980.45  |
| White-naped Crane | -5280998.87  | 5874068.52  |
| White-naped Crane | -5870642.628 | 6246154.786 |
| White-naped Crane | -5278120.148 | 5876082.739 |
| White-naped Crane | -6227450.539 | 5905067.675 |
| White-naped Crane | -6178285.172 | 5932712.837 |
| White-naped Crane | -5278104.563 | 5875520.396 |
| White-naped Crane | -6177866.611 | 5933561.149 |
| White-naped Crane | -6227273.541 | 5904659.54  |
| White-naped Crane | -5871087.906 | 6248089.653 |
| White-naped Crane | -5871792.558 | 6248959.897 |
| White-naped Crane | -6226000.046 | 5905095.318 |
| White-naped Crane | -6177422.446 | 5933340.906 |
| White-naped Crane | -5278057.809 | 5875476.641 |
| White-naped Crane | -5384868.86  | 5891976.317 |
| White-naped Crane | -5871913.896 | 6249146.148 |
| White-naped Crane | -6226042.347 | 5905082.309 |
| White-naped Crane | -5385334.176 | 5891896.76  |
| White-naped Crane | -5278095.657 | 5875513.914 |
| White-naped Crane | -6178363.096 | 5932641.061 |
| White-naped Crane | -6226045.687 | 5905070.927 |
| White-naped Crane | -5385341.968 | 5891848.052 |
| White-naped Crane | -6178365.322 | 5932645.955 |
| White-naped Crane | -5870861.927 | 6249743.871 |
| White-naped Crane | -5283690.575 | 5877914.253 |
| White-naped Crane | -6176744.511 | 5931763.48  |
| White-naped Crane | -5871115.735 | 6248837.99  |
| White-naped Crane | -5288973.798 | 5878643.725 |
| White-naped Crane | -6226193.742 | 5905292.076 |
| White-naped Crane | -5378815.306 | 5890580.121 |
| White-naped Crane | -5378808.627 | 5890570.381 |
| White-naped Crane | -5280169.539 | 5874350.45  |
| White-naped Crane | -5871131.32  | 6248824.444 |
| White-naped Crane | -6227303.597 | 5904947.346 |
| White-naped Crane | -6177147.487 | 5932264.245 |
| White-naped Crane | -5871062.302 | 6249107.204 |
| White-naped Crane | -5360400.836 | 5900008.815 |
| White-naped Crane | -5280178.445 | 5874138.191 |
| White-naped Crane | -6228007.136 | 5907118.396 |
| White-naped Crane | -6177460.295 | 5932331.124 |
| White-naped Crane | -6178365.322 | 5932641.061 |
| White-naped Crane | -5277034.783 | 5876881.75  |
| White-naped Crane | -6228166.323 | 5907084.241 |
| White-naped Crane | -5360436.458 | 5900064.069 |
| White-naped Crane | -5360425.326 | 5900052.694 |
| White-naped Crane | -5277031.443 | 5876876.888 |

|                   |              |             |
|-------------------|--------------|-------------|
| White-naped Crane | -5871770.294 | 6248882.011 |
| White-naped Crane | -6178365.322 | 5932644.324 |
| White-naped Crane | -6228149.625 | 5907102.132 |
| White-naped Crane | -5360420.874 | 5900051.068 |
| White-naped Crane | -5871776.973 | 6248910.795 |
| White-naped Crane | -5277034.783 | 5876872.025 |
| White-naped Crane | -6228131.814 | 5907095.626 |
| White-naped Crane | -6178364.209 | 5932639.43  |
| White-naped Crane | -5277030.33  | 5876876.888 |
| White-naped Crane | -6228136.267 | 5907100.505 |
| White-naped Crane | -6178373.115 | 5932650.849 |
| White-naped Crane | -5871839.312 | 6248966.67  |
| White-naped Crane | -6228139.606 | 5907118.396 |
| White-naped Crane | -5277045.915 | 5876899.579 |
| White-naped Crane | -6178364.209 | 5932595.385 |
| White-naped Crane | -5871867.142 | 6248986.988 |
| White-naped Crane | -5360425.326 | 5900060.819 |
| White-naped Crane | -5277057.046 | 5876889.854 |
| White-naped Crane | -6228141.833 | 5907090.746 |
| White-naped Crane | -5871859.35  | 6249039.476 |
| White-naped Crane | -6178363.096 | 5932641.061 |
| White-naped Crane | -5871843.765 | 6249017.465 |
| White-naped Crane | -5277060.386 | 5876883.371 |
| White-naped Crane | -6228134.04  | 5907089.12  |
| White-naped Crane | -6178374.228 | 5932628.011 |
| White-naped Crane | -5277052.594 | 5876886.612 |
| White-naped Crane | -5360452.043 | 5900062.444 |
| White-naped Crane | -5871853.784 | 6249036.09  |
| White-naped Crane | -6228129.588 | 5907095.626 |
| White-naped Crane | -6178314.115 | 5932616.592 |
| White-naped Crane | -5871742.464 | 6248837.99  |
| White-naped Crane | -6228134.04  | 5907084.241 |
| White-naped Crane | -5277670.417 | 5876082.739 |
| White-naped Crane | -6177532.653 | 5933101.093 |
| White-naped Crane | -5360376.346 | 5899989.314 |
| White-naped Crane | -5870847.455 | 6247923.742 |
| White-naped Crane | -6225357.732 | 5905347.364 |
| White-naped Crane | -5276954.633 | 5876920.649 |
| White-naped Crane | -6177301.108 | 5933234.866 |
| White-naped Crane | -5362325.55  | 5900642.636 |
| White-naped Crane | -5362449.115 | 5900733.65  |
| White-naped Crane | -5870895.323 | 6246794.614 |
| White-naped Crane | -6177323.372 | 5933190.818 |
| White-naped Crane | -5871123.528 | 6248807.513 |
| White-naped Crane | -5351557.616 | 5904122.978 |
| White-naped Crane | -6227934.778 | 5907108.637 |
| White-naped Crane | -6177342.296 | 5933298.49  |
| White-naped Crane | -5276954.633 | 5877082.73  |
| White-naped Crane | -6227944.797 | 5907103.758 |
| White-naped Crane | -5351457.428 | 5904059.568 |
| White-naped Crane | -5277919.773 | 5875977.398 |
| White-naped Crane | -5871339.488 | 6249842.084 |
| White-naped Crane | -6177229.864 | 5933309.91  |
| White-naped Crane | -6228008.249 | 5907116.77  |
| White-naped Crane | -6178363.096 | 5932652.48  |
| White-naped Crane | -5871032.246 | 6251496.648 |
| White-naped Crane | -5281023.36  | 5874047.456 |
| White-naped Crane | -5303872.799 | 5873423.68  |

|                   |              |             |
|-------------------|--------------|-------------|
| White-naped Crane | -5870900.889 | 6251669.406 |
| White-naped Crane | -6229186.01  | 5906721.549 |
| White-naped Crane | -6178365.322 | 5932647.586 |
| White-naped Crane | -6177618.369 | 5933166.348 |
| White-naped Crane | -5281012.228 | 5874040.975 |
| White-naped Crane | -5281020.02  | 5874045.836 |
| White-naped Crane | -6226733.641 | 5915137.306 |
| White-naped Crane | -6177927.837 | 5933694.929 |
| White-naped Crane | -5267972.263 | 5876171.874 |
| White-naped Crane | -5267958.904 | 5876152.426 |
| White-naped Crane | -5867226.232 | 6258857.239 |
| White-naped Crane | -5280999.983 | 5874050.697 |
| White-naped Crane | -6231100.705 | 5915720.139 |
| White-naped Crane | -6230947.084 | 5916221.601 |
| White-naped Crane | -5278085.639 | 5875484.744 |
| White-naped Crane | -5867416.589 | 6258972.511 |
| White-naped Crane | -5276930.142 | 5877050.314 |
| White-naped Crane | -5274894.109 | 5877851.035 |
| White-naped Crane | -6231818.716 | 5917771.762 |
| White-naped Crane | -6178367.549 | 5932647.586 |
| White-naped Crane | -6177062.884 | 5932037.51  |
| White-naped Crane | -6231883.281 | 5917851.557 |
| White-naped Crane | -5276945.727 | 5877102.18  |
| White-naped Crane | -5278065.601 | 5875868.817 |
| White-naped Crane | -5274867.392 | 5877859.14  |
| White-naped Crane | -6177460.295 | 5932355.593 |
| White-naped Crane | -5859717.733 | 6301737.97  |
| White-naped Crane | -6228518.093 | 5907024.062 |
| White-naped Crane | -5274903.014 | 5877857.519 |
| White-naped Crane | -5277944.263 | 5875839.646 |
| White-naped Crane | -6228501.395 | 5906996.413 |
| White-naped Crane | -6177167.525 | 5932272.401 |
| White-naped Crane | -5855372.933 | 6304723.737 |
| White-naped Crane | -5275123.427 | 5877823.479 |
| White-naped Crane | -5277011.405 | 5876936.857 |
| White-naped Crane | -6228352.227 | 5907001.292 |
| White-naped Crane | -6177140.808 | 5931854.822 |
| White-naped Crane | -5855340.65  | 6304677.715 |
| White-naped Crane | -5277075.971 | 5876991.964 |
| White-naped Crane | -6228187.474 | 5907063.097 |
| White-naped Crane | -6178356.417 | 5932644.324 |
| White-naped Crane | -5277043.688 | 5876988.723 |
| White-naped Crane | -5855367.367 | 6304643.625 |
| White-naped Crane | -6178361.983 | 5932645.955 |
| White-naped Crane | -6228147.399 | 5907102.132 |
| White-naped Crane | -5277042.575 | 5876990.343 |
| White-naped Crane | -5855355.122 | 6304638.512 |
| White-naped Crane | -6178369.775 | 5932642.692 |
| White-naped Crane | -6228138.493 | 5907095.626 |
| White-naped Crane | -5277043.688 | 5876987.102 |
| White-naped Crane | -6228132.927 | 5907100.505 |
| White-naped Crane | -5855368.48  | 6304648.739 |
| White-naped Crane | -6178351.964 | 5932641.061 |
| White-naped Crane | -5855380.725 | 6304631.694 |
| White-naped Crane | -5277050.367 | 5876990.343 |
| White-naped Crane | -6228132.927 | 5907095.626 |
| White-naped Crane | -6178367.549 | 5932644.324 |
| White-naped Crane | -6228135.154 | 5907085.867 |

|                   |              |             |
|-------------------|--------------|-------------|
| White-naped Crane | -5277053.707 | 5876991.964 |
| White-naped Crane | -5855359.575 | 6304636.807 |
| White-naped Crane | -6178370.888 | 5932639.43  |
| White-naped Crane | -5855356.235 | 6304645.33  |
| White-naped Crane | -6228141.833 | 5907095.626 |
| White-naped Crane | -5277050.367 | 5876987.102 |
| White-naped Crane | -6178375.341 | 5932637.798 |
| White-naped Crane | -5277032.556 | 5876873.646 |
| White-naped Crane | -6228140.72  | 5907095.626 |
| White-naped Crane | -5855337.311 | 6304665.784 |
| White-naped Crane | -6178370.888 | 5932636.167 |
| White-naped Crane | -5855341.764 | 6304664.079 |
| White-naped Crane | -5276955.746 | 5877076.247 |
| White-naped Crane | -6226028.989 | 5905217.275 |
| White-naped Crane | -6177188.675 | 5932208.784 |
| White-naped Crane | -5857774.094 | 6303609.062 |
| White-naped Crane | -6225371.091 | 5905035.153 |
| White-naped Crane | -6177001.659 | 5932202.259 |
| White-naped Crane | -5278473.03  | 5878929.046 |
| White-naped Crane | -5275444.027 | 5877719.738 |
| White-naped Crane | -5280958.795 | 5877888.317 |
| White-naped Crane | -6225993.367 | 5905070.927 |
| White-naped Crane | -6176952.678 | 5931787.946 |
| White-naped Crane | -5275448.48  | 5877684.077 |
| White-naped Crane | -5858263.9   | 6302545.658 |
| White-naped Crane | -6226003.385 | 5905079.057 |
| White-naped Crane | -6177538.219 | 5933125.563 |
| White-naped Crane | -5858313.994 | 6302480.904 |
| White-naped Crane | -5306814.973 | 5861667.805 |
| White-naped Crane | -5275403.952 | 5877619.24  |
| White-naped Crane | -6177391.277 | 5933411.057 |
| White-naped Crane | -6178376.454 | 5932649.217 |
| White-naped Crane | -5858748.14  | 6303447.157 |
| White-naped Crane | -5306953.009 | 5866767.455 |
| White-naped Crane | -6228516.979 | 5906999.665 |
| White-naped Crane | -5275410.631 | 5877669.488 |
| White-naped Crane | -5307060.989 | 5866684.892 |
| White-naped Crane | -6228501.395 | 5906994.786 |
| White-naped Crane | -6178367.549 | 5932644.324 |
| White-naped Crane | -5305911.058 | 5865368.84  |
| White-naped Crane | -5275412.858 | 5877659.763 |
| White-naped Crane | -6228485.81  | 5906991.533 |
| White-naped Crane | -6178374.228 | 5932636.167 |
| White-naped Crane | -5275397.273 | 5877687.319 |
| White-naped Crane | -6227947.024 | 5907105.384 |
| White-naped Crane | -6177148.6   | 5932208.784 |
| White-naped Crane | -5823080.262 | 6348984.617 |
| White-naped Crane | -5275415.084 | 5877656.521 |
| White-naped Crane | -5277943.15  | 5875980.639 |
| White-naped Crane | -5823407.541 | 6349164.547 |
| White-naped Crane | -6177745.273 | 5932934.695 |
| White-naped Crane | -6228238.681 | 5906949.246 |
| White-naped Crane | -5816948.784 | 6357910.44  |
| White-naped Crane | -5277946.489 | 5875982.26  |
| White-naped Crane | -6229149.274 | 5906702.033 |
| White-naped Crane | -5275421.763 | 5877674.351 |
| White-naped Crane | -5275455.159 | 5877658.142 |
| White-naped Crane | -5277940.923 | 5875868.817 |

|                   |              |             |
|-------------------|--------------|-------------|
| White-naped Crane | -6229282.858 | 5906679.263 |
| White-naped Crane | -6177441.371 | 5933167.979 |
| White-naped Crane | -5275386.141 | 5877671.109 |
| White-naped Crane | -5817655.663 | 6358462.833 |
| White-naped Crane | -5277940.923 | 5875842.888 |
| White-naped Crane | -6178364.209 | 5932628.011 |
| White-naped Crane | -6228880.994 | 5906552.407 |
| White-naped Crane | -5817348.421 | 6358310.149 |
| White-naped Crane | -5275419.537 | 5877674.351 |
| White-naped Crane | -5277958.734 | 5875860.714 |
| White-naped Crane | -6228512.527 | 5906978.522 |
| White-naped Crane | -6178369.775 | 5932639.43  |
| White-naped Crane | -5817156.952 | 6357913.871 |
| White-naped Crane | -6177462.521 | 5933225.077 |
| White-naped Crane | -6228509.187 | 5907001.292 |
| White-naped Crane | -5277819.585 | 5875859.094 |
| White-naped Crane | -5275390.594 | 5877679.214 |
| White-naped Crane | -5816848.597 | 6358042.53  |
| White-naped Crane | -6226750.339 | 5904705.068 |
| White-naped Crane | -5279090.854 | 5876210.77  |
| White-naped Crane | -6177709.651 | 5933070.097 |
| White-naped Crane | -6228138.493 | 5907090.746 |
| White-naped Crane | -5280404.424 | 5876985.481 |
| White-naped Crane | -5816869.748 | 6358193.494 |
| White-naped Crane | -6178364.209 | 5932637.798 |
| White-naped Crane | -5816840.805 | 6358162.615 |
| White-naped Crane | -5280447.838 | 5877009.793 |
| White-naped Crane | -6228131.814 | 5907082.614 |
| White-naped Crane | -6178369.775 | 5932660.636 |
| White-naped Crane | -5816838.578 | 6358160.899 |
| White-naped Crane | -5280441.159 | 5877009.793 |
| White-naped Crane | -6228138.493 | 5907092.373 |
| White-naped Crane | -6178363.096 | 5932639.43  |
| White-naped Crane | -5816827.446 | 6358147.175 |
| White-naped Crane | -6228137.38  | 5907102.132 |
| White-naped Crane | -5280450.065 | 5877009.793 |
| White-naped Crane | -6178360.87  | 5932628.011 |
| White-naped Crane | -5816833.012 | 6358155.753 |
| White-naped Crane | -6228146.286 | 5907108.637 |
| White-naped Crane | -5280448.951 | 5877006.552 |
| White-naped Crane | -6178358.643 | 5932644.324 |
| White-naped Crane | -5280448.951 | 5877008.172 |
| White-naped Crane | -6178376.454 | 5932639.43  |
| White-naped Crane | -5816830.786 | 6358150.606 |
| White-naped Crane | -5816834.125 | 6358150.606 |
| White-naped Crane | -5280446.725 | 5877013.035 |
| White-naped Crane | -6228135.154 | 5907093.999 |
| White-naped Crane | -6178367.549 | 5932632.905 |
| White-naped Crane | -5816840.805 | 6358145.46  |
| White-naped Crane | -5280441.159 | 5877003.31  |
| White-naped Crane | -6228043.872 | 5907133.034 |
| White-naped Crane | -6178363.096 | 5932641.061 |
| White-naped Crane | -5272700.002 | 5876901.2   |
| White-naped Crane | -5275383.915 | 5877650.037 |
| White-naped Crane | -5816903.143 | 6358159.184 |
| White-naped Crane | -6228146.286 | 5907090.746 |
| White-naped Crane | -5816010.361 | 6361167     |
| White-naped Crane | -5275426.216 | 5877658.142 |

|                   |              |             |
|-------------------|--------------|-------------|
| White-naped Crane | -6224887.964 | 5905077.431 |
| White-naped Crane | -5277014.745 | 5877098.938 |
| White-naped Crane | -6177140.808 | 5933464.894 |
| White-naped Crane | -5275417.31  | 5877612.756 |
| White-naped Crane | -5277939.81  | 5875983.88  |
| White-naped Crane | -6223328.378 | 5902432.212 |
| White-naped Crane | -6177240.996 | 5933251.179 |
| White-naped Crane | -5273454.748 | 5877507.397 |
| White-naped Crane | -5279583.999 | 5879679.68  |
| White-naped Crane | -6223706.864 | 5902170.498 |
| White-naped Crane | -6177330.051 | 5933195.712 |
| White-naped Crane | -5270830.947 | 5880012.055 |
| White-naped Crane | -5814779.168 | 6376043.676 |
| White-naped Crane | -6227565.198 | 5908338.326 |
| White-naped Crane | -5280005.9   | 5879760.746 |
| White-naped Crane | -6177328.938 | 5933097.83  |
| White-naped Crane | -5813885.272 | 6375680.932 |
| White-naped Crane | -5281310.564 | 5881886.565 |
| White-naped Crane | -5270853.211 | 5880021.784 |
| White-naped Crane | -6230053.188 | 5913703.184 |
| White-naped Crane | -5820347.368 | 6376427.068 |
| White-naped Crane | -5284069.061 | 5881743.855 |
| White-naped Crane | -5270846.532 | 5880005.57  |
| White-naped Crane | -6229725.909 | 5913669.002 |
| White-naped Crane | -6178367.549 | 5932647.586 |
| White-naped Crane | -5814144.646 | 6376437.383 |
| White-naped Crane | -5281573.278 | 5873943.761 |
| White-naped Crane | -5270797.551 | 5879995.842 |
| White-naped Crane | -6178364.209 | 5932637.798 |
| White-naped Crane | -5814445.209 | 6376547.419 |
| White-naped Crane | -5281204.811 | 5874133.331 |
| White-naped Crane | -6177678.481 | 5933120.669 |
| White-naped Crane | -5275317.123 | 5877494.429 |
| White-naped Crane | -5275194.671 | 5877465.253 |
| White-naped Crane | -5281463.072 | 5873710.449 |
| White-naped Crane | -6177726.349 | 5933039.101 |
| White-naped Crane | -6226546.624 | 5917081.32  |
| White-naped Crane | -5815248.936 | 6374842.039 |
| White-naped Crane | -5815125.371 | 6374775     |
| White-naped Crane | -5275221.388 | 5877460.39  |
| White-naped Crane | -6230848.01  | 5922642.249 |
| White-naped Crane | -6177414.654 | 5933130.457 |
| White-naped Crane | -5281524.298 | 5873804.421 |
| White-naped Crane | -5275214.709 | 5877450.665 |
| White-naped Crane | -6177303.334 | 5933283.807 |
| White-naped Crane | -5281613.353 | 5873963.203 |
| White-naped Crane | -5815097.541 | 6374986.432 |
| White-naped Crane | -5815474.914 | 6375407.594 |
| White-naped Crane | -5275232.52  | 5877445.802 |
| White-naped Crane | -5277946.489 | 5875961.192 |
| White-naped Crane | -6230718.879 | 5924322.309 |
| White-naped Crane | -6177076.243 | 5933406.163 |
| White-naped Crane | -5275199.124 | 5877473.358 |
| White-naped Crane | -6178366.436 | 5932639.43  |
| White-naped Crane | -5277889.716 | 5875996.845 |
| White-naped Crane | -6230723.332 | 5924301.123 |
| White-naped Crane | -5275408.405 | 5877659.763 |
| White-naped Crane | -6229848.361 | 5924183.785 |

|                   |              |             |
|-------------------|--------------|-------------|
| White-naped Crane | -5812123.085 | 6376444.261 |
| White-naped Crane | -6178358.643 | 5932650.849 |
| White-naped Crane | -5814320.531 | 6366794.358 |
| White-naped Crane | -5277766.152 | 5875948.227 |
| White-naped Crane | -6178364.209 | 5932649.217 |
| White-naped Crane | -6229964.133 | 5924252.232 |
| White-naped Crane | -5275297.085 | 5877593.305 |
| White-naped Crane | -5277453.344 | 5876789.366 |
| White-naped Crane | -5817231.536 | 6358030.522 |
| White-naped Crane | -5275326.028 | 5877536.573 |
| White-naped Crane | -6229906.247 | 5923540.087 |
| White-naped Crane | -5275328.255 | 5877512.259 |
| White-naped Crane | -6178369.775 | 5932636.167 |
| White-naped Crane | -5277493.419 | 5876810.436 |
| White-naped Crane | -6229966.359 | 5923575.938 |
| White-naped Crane | -5816839.691 | 6358047.677 |
| White-naped Crane | -5816840.805 | 6358037.384 |
| White-naped Crane | -5277495.645 | 5876808.815 |
| White-naped Crane | -6178366.436 | 5932639.43  |
| White-naped Crane | -6230064.32  | 5923525.421 |
| White-naped Crane | -5277492.306 | 5876825.023 |
| White-naped Crane | -6230108.848 | 5923378.763 |
| White-naped Crane | -6178364.209 | 5932642.692 |
| White-naped Crane | -5816833.012 | 6358106.003 |
| White-naped Crane | -5277491.192 | 5876815.298 |
| White-naped Crane | -6230117.754 | 5923370.615 |
| White-naped Crane | -6178358.643 | 5932647.586 |
| White-naped Crane | -5277491.192 | 5876820.16  |
| White-naped Crane | -6230124.433 | 5923351.061 |
| White-naped Crane | -5816860.842 | 6358064.832 |
| White-naped Crane | -6178363.096 | 5932645.955 |
| White-naped Crane | -5277493.419 | 5876818.54  |
| White-naped Crane | -5816847.484 | 6358054.539 |
| White-naped Crane | -6230106.622 | 5923351.061 |
| White-naped Crane | -6178347.511 | 5932660.636 |
| White-naped Crane | -5816815.201 | 6358030.522 |
| White-naped Crane | -5277490.079 | 5876807.194 |
| White-naped Crane | -6178363.096 | 5932637.798 |
| White-naped Crane | -5816995.539 | 6357855.546 |
| White-naped Crane | -6177952.327 | 5932071.765 |
| White-naped Crane | -5277190.63  | 5876816.919 |
| White-naped Crane | -6229892.888 | 5923647.639 |
| White-naped Crane | -5275361.651 | 5877659.763 |
| White-naped Crane | -5277118.272 | 5875919.056 |
| White-naped Crane | -6233083.305 | 5917516.097 |
| White-naped Crane | -6177686.274 | 5933107.618 |
| White-naped Crane | -5816912.049 | 6357907.009 |
| White-naped Crane | -5817249.347 | 6357929.31  |
| White-naped Crane | -6233194.624 | 5916356.741 |
| White-naped Crane | -5277280.799 | 5876596.496 |
| White-naped Crane | -6177129.676 | 5933226.709 |
| White-naped Crane | -5277343.138 | 5876677.533 |
| White-naped Crane | -6228501.395 | 5906989.907 |
| White-naped Crane | -6177529.313 | 5933172.873 |
| White-naped Crane | -5816523.544 | 6358164.33  |
| White-naped Crane | -5277334.232 | 5876669.43  |
| White-naped Crane | -6178177.192 | 5932805.821 |
| White-naped Crane | -5816477.903 | 6358078.555 |



|                   |              |             |
|-------------------|--------------|-------------|
| White-naped Crane | -5279323.511 | 5876345.286 |
| White-naped Crane | -6228472.452 | 5906993.16  |
| White-naped Crane | -5280315.368 | 5875024.527 |
| White-naped Crane | -6228508.074 | 5906985.027 |
| White-naped Crane | -5820260.539 | 6371550.892 |
| White-naped Crane | -6178365.322 | 5932644.324 |
| White-naped Crane | -5820167.031 | 6371477.006 |
| White-naped Crane | -5280313.142 | 5875019.665 |
| White-naped Crane | -6228495.829 | 5906996.413 |
| White-naped Crane | -6178373.115 | 5932637.798 |
| White-naped Crane | -5280322.047 | 5874996.979 |
| White-naped Crane | -5275328.255 | 5877406.901 |
| White-naped Crane | -6178360.87  | 5932644.324 |
| White-naped Crane | -5815385.859 | 6375854.566 |
| White-naped Crane | -6178420.982 | 5932851.498 |
| White-naped Crane | -5280327.613 | 5875000.22  |
| White-naped Crane | -6228559.281 | 5907020.809 |
| White-naped Crane | -5815572.876 | 6375589.818 |
| White-naped Crane | -6228506.961 | 5906994.786 |
| White-naped Crane | -6177809.838 | 5933066.834 |
| White-naped Crane | -5275221.388 | 5877423.11  |
| White-naped Crane | -5277411.042 | 5876834.747 |
| White-naped Crane | -6228511.413 | 5906998.039 |
| White-naped Crane | -6177690.726 | 5933084.779 |
| White-naped Crane | -5275214.709 | 5877408.522 |
| White-naped Crane | -5277874.132 | 5876659.705 |
| White-naped Crane | -6228508.074 | 5906988.28  |
| White-naped Crane | -6177373.466 | 5933288.701 |
| White-naped Crane | -5815578.442 | 6375770.327 |
| White-naped Crane | -6228434.603 | 5907079.361 |
| White-naped Crane | -6177000.545 | 5933311.541 |
| White-naped Crane | -5815553.951 | 6376026.484 |
| White-naped Crane | -6228470.225 | 5907102.132 |
| White-naped Crane | -6177016.13  | 5933455.106 |
| White-naped Crane | -5277835.17  | 5876886.612 |
| White-naped Crane | -5815252.275 | 6375959.435 |
| White-naped Crane | -6177449.163 | 5933223.446 |
| White-naped Crane | -6228463.546 | 5907067.976 |
| White-naped Crane | -5815168.786 | 6375902.702 |
| White-naped Crane | -6178367.549 | 5932619.854 |
| White-naped Crane | -5277487.853 | 5876803.953 |
| White-naped Crane | -5814112.364 | 6376452.857 |
| White-naped Crane | -5277483.4   | 5876815.298 |
| White-naped Crane | -6228512.527 | 5906898.827 |
| White-naped Crane | -6178363.096 | 5932645.955 |
| White-naped Crane | -5277484.513 | 5876815.298 |
| White-naped Crane | -6228474.678 | 5906858.167 |
| White-naped Crane | -5814093.44  | 6376458.015 |
| White-naped Crane | -6178366.436 | 5932641.061 |
| White-naped Crane | -5277476.721 | 5876823.402 |
| White-naped Crane | -6178366.436 | 5932629.642 |
| White-naped Crane | -5814081.194 | 6376471.769 |
| White-naped Crane | -6228469.112 | 5906897.2   |
| White-naped Crane | -5277480.061 | 5876825.023 |
| White-naped Crane | -6228472.452 | 5906897.2   |
| White-naped Crane | -5814107.911 | 6376451.138 |
| White-naped Crane | -6178365.322 | 5932644.324 |
| White-naped Crane | -5814096.779 | 6376470.05  |

|                   |              |             |
|-------------------|--------------|-------------|
| White-naped Crane | -5277483.4   | 5876820.16  |
| White-naped Crane | -6228482.47  | 5906890.695 |
| White-naped Crane | -6178348.624 | 5932644.324 |
| White-naped Crane | -5277477.834 | 5876823.402 |
| White-naped Crane | -6228479.131 | 5906893.948 |
| White-naped Crane | -5814091.213 | 6376459.734 |
| White-naped Crane | -6178351.964 | 5932634.536 |
| White-naped Crane | -5814055.591 | 6376411.594 |
| White-naped Crane | -5277442.212 | 5876820.16  |
| White-naped Crane | -6228472.452 | 5906885.816 |
| White-naped Crane | -6178365.322 | 5932639.43  |
| White-naped Crane | -6226024.536 | 5905201.014 |
| White-naped Crane | -5811144.586 | 6375744.54  |
| White-naped Crane | -6178167.174 | 5932500.772 |
| White-naped Crane | -5277748.34  | 5876923.891 |
| White-naped Crane | -5806029.456 | 6374625.453 |
| White-naped Crane | -6225962.197 | 5905236.788 |
| White-naped Crane | -5276913.444 | 5877056.797 |
| White-naped Crane | -6176980.508 | 5933318.067 |
| White-naped Crane | -5277812.906 | 5876818.54  |
| White-naped Crane | -6227165.561 | 5904737.588 |
| White-naped Crane | -6176951.565 | 5933401.269 |
| White-naped Crane | -5277907.527 | 5876800.711 |
| White-naped Crane | -6227298.031 | 5904687.182 |
| White-naped Crane | -6177008.338 | 5933437.16  |
| White-naped Crane | -5280745.061 | 5877465.253 |
| White-naped Crane | -5815319.067 | 6358371.908 |
| White-naped Crane | -5279840.034 | 5879391.092 |
| White-naped Crane | -6227170.014 | 5904664.418 |
| White-naped Crane | -5279551.716 | 5879699.136 |
| White-naped Crane | -6177387.937 | 5933166.348 |
| White-naped Crane | -6226969.638 | 5904731.084 |
| White-naped Crane | -5815181.031 | 6358329.02  |
| White-naped Crane | -5277311.968 | 5876873.646 |
| White-naped Crane | -5815163.22  | 6358329.02  |
| White-naped Crane | -6178360.87  | 5932641.061 |
| White-naped Crane | -5280099.408 | 5873932.419 |
| White-naped Crane | -6226713.604 | 5904948.972 |
| White-naped Crane | -6227301.371 | 5904646.532 |
| White-naped Crane | -5815163.22  | 6358317.011 |
| White-naped Crane | -5280030.39  | 5873896.774 |
| White-naped Crane | -6178360.87  | 5932642.692 |
| White-naped Crane | -5280010.353 | 5873912.976 |
| White-naped Crane | -6178363.096 | 5932650.849 |
| White-naped Crane | -5815365.821 | 6358387.348 |
| White-naped Crane | -6226065.724 | 5905040.031 |
| White-naped Crane | -5815345.784 | 6358394.21  |
| White-naped Crane | -6178354.19  | 5932660.636 |
| White-naped Crane | -5280030.39  | 5873934.039 |
| White-naped Crane | -6227089.864 | 5904493.69  |
| White-naped Crane | -5279999.221 | 5873874.091 |
| White-naped Crane | -6178357.53  | 5932645.955 |
| White-naped Crane | -5280160.634 | 5873846.547 |
| White-naped Crane | -6227102.109 | 5904623.768 |
| White-naped Crane | -5815808.873 | 6358514.3   |
| White-naped Crane | -5279996.994 | 5873865.99  |
| White-naped Crane | -6178349.738 | 5932133.749 |
| White-naped Crane | -6227158.882 | 5904654.662 |

|                   |              |             |
|-------------------|--------------|-------------|
| White-naped Crane | -5815307.935 | 6358377.055 |
| White-naped Crane | -6226969.638 | 5904836.775 |
| White-naped Crane | -6177059.545 | 5931505.768 |
| White-naped Crane | -5278001.036 | 5876593.255 |
| White-naped Crane | -5815305.709 | 6358368.477 |
| White-naped Crane | -6176949.338 | 5931474.778 |
| White-naped Crane | -5277894.169 | 5876731.018 |
| White-naped Crane | -6227244.598 | 5905100.196 |
| White-naped Crane | -6177243.222 | 5932244.67  |
| White-naped Crane | -6227044.223 | 5904698.564 |
| White-naped Crane | -5277817.359 | 5876839.61  |
| White-naped Crane | -5815164.333 | 6358332.451 |
| White-naped Crane | -5815075.277 | 6358294.709 |
| White-naped Crane | -6177341.183 | 5932252.826 |
| White-naped Crane | -5277480.061 | 5876821.781 |
| White-naped Crane | -5277481.174 | 5876812.056 |
| White-naped Crane | -6178365.322 | 5932632.905 |
| White-naped Crane | -5815101.994 | 6358095.71  |
| White-naped Crane | -5277478.947 | 5876820.16  |
| White-naped Crane | -6178363.096 | 5932644.324 |
| White-naped Crane | -6228141.833 | 5907097.252 |
| White-naped Crane | -5277480.061 | 5876818.54  |
| White-naped Crane | -5815112.013 | 6358106.003 |
| White-naped Crane | -6178365.322 | 5932639.43  |
| White-naped Crane | -6228136.267 | 5907100.505 |
| White-naped Crane | -5815105.334 | 6358116.296 |
| White-naped Crane | -6228131.814 | 5907095.626 |
| White-naped Crane | -5277483.4   | 5876823.402 |
| White-naped Crane | -6178367.549 | 5932645.955 |
| White-naped Crane | -5277485.626 | 5876820.16  |
| White-naped Crane | -6228140.72  | 5907113.517 |
| White-naped Crane | -5815179.918 | 6358119.727 |
| White-naped Crane | -6178354.19  | 5932650.849 |
| White-naped Crane | -5277478.947 | 5876826.643 |
| White-naped Crane | -6228145.172 | 5907097.252 |
| White-naped Crane | -6178360.87  | 5932642.692 |
| White-naped Crane | -5815177.691 | 6358114.581 |
| White-naped Crane | -6228130.701 | 5907098.879 |
| White-naped Crane | -5277474.495 | 5876820.16  |
| White-naped Crane | -6178361.983 | 5932652.48  |
| White-naped Crane | -5815179.918 | 6358123.158 |
| White-naped Crane | -5815113.126 | 6358119.727 |
| White-naped Crane | -6228132.927 | 5907100.505 |
| White-naped Crane | -5277494.532 | 5876803.953 |
| White-naped Crane | -6178364.209 | 5932636.167 |
| White-naped Crane | -6227981.533 | 5907107.011 |
| White-naped Crane | -5278042.224 | 5876384.183 |
| White-naped Crane | -5815201.068 | 6358066.547 |
| White-naped Crane | -5814870.45  | 6359212.568 |
| White-naped Crane | -5278041.111 | 5876405.252 |
| White-naped Crane | -6177256.58  | 5933270.756 |
| White-naped Crane | -6226185.949 | 5905087.187 |
| White-naped Crane | -6176923.735 | 5933562.781 |
| White-naped Crane | -5814680.093 | 6359706.709 |
| White-naped Crane | -5279263.399 | 5875781.305 |
| White-naped Crane | -5280127.238 | 5880195.273 |
| White-naped Crane | -5814851.525 | 6360588.687 |
| White-naped Crane | -5279246.701 | 5875513.914 |

|                   |              |             |
|-------------------|--------------|-------------|
| White-naped Crane | -6177330.051 | 5933215.289 |
| White-naped Crane | -6226790.414 | 5904830.271 |
| White-naped Crane | -5279965.825 | 5874859.243 |
| White-naped Crane | -5814550.963 | 6364145.007 |
| White-naped Crane | -5277900.848 | 5876755.33  |
| White-naped Crane | -6177602.784 | 5933287.07  |
| White-naped Crane | -6227171.127 | 5904669.296 |
| White-naped Crane | -5815208.861 | 6371178.035 |
| White-naped Crane | -5279961.372 | 5874844.66  |
| White-naped Crane | -6226526.587 | 5904924.581 |
| White-naped Crane | -6177566.048 | 5933088.042 |
| White-naped Crane | -5278183.6   | 5876619.186 |
| White-naped Crane | -5279956.919 | 5874846.28  |
| White-naped Crane | -5815169.899 | 6371222.708 |
| White-naped Crane | -6178359.756 | 5932639.43  |
| White-naped Crane | -6226980.77  | 5904820.515 |
| White-naped Crane | -5814121.269 | 6372398.044 |
| White-naped Crane | -5279970.278 | 5874860.864 |
| White-naped Crane | -6226882.809 | 5904796.125 |
| White-naped Crane | -5280170.653 | 5873841.686 |
| White-naped Crane | -6178366.436 | 5932637.798 |
| White-naped Crane | -5280010.353 | 5874807.391 |
| White-naped Crane | -6178365.322 | 5932647.586 |
| White-naped Crane | -5280181.785 | 5873848.167 |
| White-naped Crane | -6225679.446 | 5905202.64  |
| White-naped Crane | -5280175.105 | 5873869.23  |
| White-naped Crane | -6227657.593 | 5905023.771 |
| White-naped Crane | -6178360.87  | 5932652.48  |
| White-naped Crane | -5280526.875 | 5873951.862 |
| White-naped Crane | -5280676.043 | 5873901.635 |
| White-naped Crane | -6178341.945 | 5932562.76  |
| White-naped Crane | -6228751.864 | 5906308.457 |
| White-naped Crane | -6228503.621 | 5906993.16  |
| White-naped Crane | -5280662.685 | 5873895.154 |
| White-naped Crane | -5280204.048 | 5873854.648 |
| White-naped Crane | -6177867.724 | 5932086.445 |
| White-naped Crane | -5281171.415 | 5873177.422 |
| White-naped Crane | -5280246.35  | 5873846.547 |
| White-naped Crane | -6228503.621 | 5906993.16  |
| White-naped Crane | -5842996.432 | 6318594.649 |
| White-naped Crane | -6177670.689 | 5932352.33  |
| White-naped Crane | -5841817.559 | 6319327.135 |
| White-naped Crane | -5281368.45  | 5873678.046 |
| White-naped Crane | -6228521.432 | 5907095.626 |
| White-naped Crane | -6177330.051 | 5932461.623 |
| White-naped Crane | -5860817.569 | 6298162.253 |
| White-naped Crane | -6228341.095 | 5906986.654 |
| White-naped Crane | -6177264.373 | 5932564.391 |
| White-naped Crane | -5281352.866 | 5873691.007 |
| White-naped Crane | -6228508.074 | 5907009.424 |
| White-naped Crane | -6177405.748 | 5932497.51  |
| White-naped Crane | -5281492.015 | 5873697.488 |
| White-naped Crane | -5859133.305 | 6301250.669 |
| White-naped Crane | -5858869.478 | 6301824.87  |
| White-naped Crane | -5281624.485 | 5873577.595 |
| White-naped Crane | -6178363.096 | 5932642.692 |
| White-naped Crane | -5858878.384 | 6301833.389 |
| White-naped Crane | -6178356.417 | 5932639.43  |

|                   |              |             |
|-------------------|--------------|-------------|
| White-naped Crane | -5281611.127 | 5873563.013 |
| White-naped Crane | -6228136.267 | 5907098.879 |
| White-naped Crane | -6228134.04  | 5907092.373 |
| White-naped Crane | -5281893.878 | 5873527.369 |
| White-naped Crane | -6178358.643 | 5932637.798 |
| White-naped Crane | -5858872.818 | 6301833.389 |
| White-naped Crane | -6228138.493 | 5907103.758 |
| White-naped Crane | -5858871.705 | 6301838.501 |
| White-naped Crane | -5281899.444 | 5873533.85  |
| White-naped Crane | -6178363.096 | 5932644.324 |
| White-naped Crane | -5858869.478 | 6301835.093 |
| White-naped Crane | -5281898.331 | 5873537.09  |
| White-naped Crane | -6228132.927 | 5907098.879 |
| White-naped Crane | -6178364.209 | 5932639.43  |
| White-naped Crane | -5858882.837 | 6301831.685 |
| White-naped Crane | -6228136.267 | 5907103.758 |
| White-naped Crane | -5281897.218 | 5873532.23  |
| White-naped Crane | -6178363.096 | 5932642.692 |
| White-naped Crane | -5281899.444 | 5873533.85  |
| White-naped Crane | -6228132.927 | 5907100.505 |
| White-naped Crane | -5858875.044 | 6301826.574 |
| White-naped Crane | -6178357.53  | 5932662.268 |
| White-naped Crane | -6228135.154 | 5907103.758 |
| White-naped Crane | -6178359.756 | 5932641.061 |
| White-naped Crane | -5858868.365 | 6301828.277 |
| White-naped Crane | -5859463.924 | 6302504.76  |
| White-naped Crane | -5270787.533 | 5873535.47  |
| White-naped Crane | -6177618.369 | 5933099.461 |
| White-naped Crane | -5859492.867 | 6302467.271 |
| White-naped Crane | -6225246.413 | 5905415.661 |
| White-naped Crane | -5270781.967 | 5873736.373 |
| White-naped Crane | -6227942.571 | 5907115.143 |
| White-naped Crane | -5859318.096 | 6302201.444 |
| White-naped Crane | -6177380.145 | 5933223.446 |
| White-naped Crane | -6227942.571 | 5907123.275 |
| White-naped Crane | -5277964.3   | 5876802.332 |
| White-naped Crane | -6227989.325 | 5907108.637 |
| White-naped Crane | -6177006.111 | 5933393.112 |
| White-naped Crane | -6228131.814 | 5907111.89  |
| White-naped Crane | -5813483.409 | 6360574.959 |
| White-naped Crane | -5280181.785 | 5874353.691 |
| White-naped Crane | -5815570.649 | 6368091.012 |
| White-naped Crane | -5280517.969 | 5873768.777 |
| White-naped Crane | -6227633.103 | 5908112.22  |
| White-naped Crane | -6178366.436 | 5932642.692 |
| White-naped Crane | -5815569.536 | 6368233.57  |
| White-naped Crane | -5280477.894 | 5873715.31  |
| White-naped Crane | -6227521.783 | 5908156.139 |
| White-naped Crane | -6178364.209 | 5932642.692 |
| White-naped Crane | -5815644.12  | 6368257.616 |
| White-naped Crane | -6227581.896 | 5908213.072 |
| White-naped Crane | -5280421.121 | 5873807.662 |
| White-naped Crane | -6178351.964 | 5932636.167 |
| White-naped Crane | -5280499.045 | 5873938.9   |
| White-naped Crane | -5815768.798 | 6368185.478 |
| White-naped Crane | -6227606.386 | 5908092.7   |
| White-naped Crane | -6178360.87  | 5932644.324 |
| White-naped Crane | -6227108.788 | 5904573.362 |

|                   |              |             |
|-------------------|--------------|-------------|
| White-naped Crane | -5280748.401 | 5874031.254 |
| White-naped Crane | -6178370.888 | 5932655.742 |
| White-naped Crane | -5815560.63  | 6368224.982 |
| White-naped Crane | -5280690.515 | 5874050.697 |
| White-naped Crane | -6178360.87  | 5932644.324 |
| White-naped Crane | -6227149.976 | 5904631.898 |
| White-naped Crane | -6178365.322 | 5932639.43  |
| White-naped Crane | -5277982.111 | 5876742.363 |
| White-naped Crane | -5815572.876 | 6368223.265 |
| White-naped Crane | -6227165.561 | 5904718.076 |
| White-naped Crane | -5814247.06  | 6359375.562 |
| White-naped Crane | -5277958.734 | 5876966.031 |
| White-naped Crane | -6178373.115 | 5932649.217 |
| White-naped Crane | -6227159.995 | 5904739.214 |
| White-naped Crane | -5815032.976 | 6359320.658 |
| White-naped Crane | -5277865.226 | 5876966.031 |
| White-naped Crane | -6177333.391 | 5932561.129 |
| White-naped Crane | -6225949.952 | 5905209.144 |
| White-naped Crane | -5814516.454 | 6359427.035 |
| White-naped Crane | -5276972.444 | 5877141.08  |
| White-naped Crane | -6177261.033 | 5932637.798 |
| White-naped Crane | -6225899.858 | 5905235.162 |
| White-naped Crane | -5277059.273 | 5876993.585 |
| White-naped Crane | -5814514.227 | 6359415.025 |
| White-naped Crane | -6178365.322 | 5932641.061 |
| White-naped Crane | -5814516.454 | 6359415.025 |
| White-naped Crane | -5272727.831 | 5877073.005 |
| White-naped Crane | -6228139.606 | 5907093.999 |
| White-naped Crane | -6178360.87  | 5932641.061 |
| White-naped Crane | -5814530.925 | 6359428.751 |
| White-naped Crane | -5272722.265 | 5877077.868 |
| White-naped Crane | -6228137.38  | 5907102.132 |
| White-naped Crane | -6178307.436 | 5932649.217 |
| White-naped Crane | -5272734.511 | 5877074.626 |
| White-naped Crane | -5814499.756 | 6359416.74  |
| White-naped Crane | -6228138.493 | 5907100.505 |
| White-naped Crane | -6178356.417 | 5932639.43  |
| White-naped Crane | -5814336.116 | 6359471.645 |
| White-naped Crane | -5272744.529 | 5877066.522 |
| White-naped Crane | -6227943.684 | 5907103.758 |
| White-naped Crane | -6178380.907 | 5932642.692 |
| White-naped Crane | -5272748.982 | 5877071.384 |
| White-naped Crane | -6227955.929 | 5907118.396 |
| White-naped Crane | -5814357.267 | 6359490.518 |
| White-naped Crane | -6178369.775 | 5932644.324 |
| White-naped Crane | -6227955.929 | 5907072.855 |
| White-naped Crane | -6178359.756 | 5932642.692 |
| White-naped Crane | -5814360.606 | 6359497.382 |
| White-naped Crane | -5273157.525 | 5877100.559 |
| White-naped Crane | -6227998.231 | 5907133.034 |
| White-naped Crane | -6178363.096 | 5932637.798 |
| White-naped Crane | -5814933.902 | 6360521.764 |
| White-naped Crane | -6177415.767 | 5932422.473 |
| White-naped Crane | -6228041.645 | 5907128.155 |
| White-naped Crane | -5278778.046 | 5879368.394 |
| White-naped Crane | -6227722.158 | 5907835.694 |
| White-naped Crane | -6177284.41  | 5932513.822 |
| White-naped Crane | -5810258.483 | 6373609.639 |

|                   |              |             |
|-------------------|--------------|-------------|
| White-naped Crane | -6177460.295 | 5932309.918 |
| White-naped Crane | -5281253.791 | 5877019.518 |
| White-naped Crane | -6227668.725 | 5908043.901 |
| White-naped Crane | -5281244.886 | 5876980.619 |
| White-naped Crane | -6227187.825 | 5908387.127 |
| White-naped Crane | -5811471.865 | 6379720.153 |
| White-naped Crane | -5809768.677 | 6375036.283 |
| White-naped Crane | -6226581.133 | 5905074.179 |
| White-naped Crane | -5282075.329 | 5876752.088 |
| White-naped Crane | -6226556.643 | 5910591.584 |
| White-naped Crane | -5302272.024 | 5872292.895 |
| White-naped Crane | -5803980.064 | 6374293.71  |
| White-naped Crane | -6178367.549 | 5932636.167 |
| White-naped Crane | -5803993.422 | 6374288.553 |
| White-naped Crane | -5302266.458 | 5872313.954 |
| White-naped Crane | -6178363.096 | 5932637.798 |
| White-naped Crane | -6226629.001 | 5910650.16  |
| White-naped Crane | -5803974.498 | 6374297.148 |
| White-naped Crane | -6226740.32  | 5915075.443 |
| White-naped Crane | -6178365.322 | 5932637.798 |
| White-naped Crane | -5811354.98  | 6360914.734 |
| White-naped Crane | -6178359.756 | 5932641.061 |
| White-naped Crane | -5306519.976 | 5866956.868 |
| White-naped Crane | -5811316.018 | 6360806.623 |
| White-naped Crane | -6178300.757 | 5932486.091 |
| White-naped Crane | -5306639.088 | 5866765.836 |
| White-naped Crane | -6228866.523 | 5915197.541 |
| White-naped Crane | -5811312.679 | 6360804.907 |
| White-naped Crane | -6228742.958 | 5915199.169 |
| White-naped Crane | -6177436.918 | 5933161.453 |
| White-naped Crane | -5306615.711 | 5866772.312 |
| White-naped Crane | -5307140.026 | 5866707.556 |
| White-naped Crane | -6177196.468 | 5933229.971 |
| White-naped Crane | -6177010.564 | 5933311.541 |
| White-naped Crane | -5306949.669 | 5866663.846 |
| White-naped Crane | -5811635.505 | 6360870.117 |
| White-naped Crane | -5812537.193 | 6360834.079 |
| White-naped Crane | -5306659.125 | 5866508.435 |
| White-naped Crane | -6177740.82  | 5933043.995 |
| White-naped Crane | -6227699.894 | 5907814.549 |
| White-naped Crane | -5813523.484 | 6360571.527 |
| White-naped Crane | -6226034.555 | 5905210.77  |
| White-naped Crane | -5307190.119 | 5863434.784 |
| White-naped Crane | -6177893.328 | 5933305.015 |
| White-naped Crane | -6226027.876 | 5905212.396 |
| White-naped Crane | -5813629.237 | 6359679.256 |
| White-naped Crane | -6177857.706 | 5933215.289 |
| White-naped Crane | -5307563.04  | 5861484.979 |
| White-naped Crane | -6227233.466 | 5904638.402 |
| White-naped Crane | -5813721.632 | 6359780.49  |
| White-naped Crane | -6178369.775 | 5932636.167 |
| White-naped Crane | -5813622.558 | 6359663.814 |
| White-naped Crane | -5306587.881 | 5866966.582 |
| White-naped Crane | -6227301.371 | 5904646.532 |
| White-naped Crane | -6178350.851 | 5932629.642 |
| White-naped Crane | -5306581.202 | 5866961.725 |
| White-naped Crane | -5813616.992 | 6359665.529 |
| White-naped Crane | -6227294.691 | 5904734.336 |

|                   |              |             |
|-------------------|--------------|-------------|
| White-naped Crane | -6178356.417 | 5932647.586 |
| White-naped Crane | -5306575.636 | 5866960.106 |
| White-naped Crane | -6227293.578 | 5904750.596 |
| White-naped Crane | -5813616.992 | 6359677.54  |
| White-naped Crane | -6178356.417 | 5932642.692 |
| White-naped Crane | -5813620.332 | 6359665.529 |
| White-naped Crane | -6227298.031 | 5904748.97  |
| White-naped Crane | -5306584.541 | 5866953.63  |
| White-naped Crane | -6178368.662 | 5932662.268 |
| White-naped Crane | -5813630.35  | 6359662.098 |
| White-naped Crane | -5306583.428 | 5866953.63  |
| White-naped Crane | -6227300.257 | 5904740.84  |
| White-naped Crane | -6178363.096 | 5932642.692 |
| White-naped Crane | -5813640.369 | 6359651.803 |
| White-naped Crane | -5306581.202 | 5866811.165 |
| White-naped Crane | -6178383.134 | 5932639.43  |
| White-naped Crane | -6227298.031 | 5904748.97  |
| White-naped Crane | -6227298.031 | 5904745.718 |
| White-naped Crane | -6178386.473 | 5932634.536 |
| White-naped Crane | -5306590.107 | 5866812.784 |
| White-naped Crane | -6225733.992 | 5905183.127 |
| White-naped Crane | -6178400.945 | 5932500.772 |
| White-naped Crane | -5813418.843 | 6360384.486 |
| White-naped Crane | -6227973.74  | 5907113.517 |
| White-naped Crane | -5307830.206 | 5861588.526 |
| White-naped Crane | -6178365.322 | 5932251.195 |
| White-naped Crane | -5814007.723 | 6362320.315 |
| White-naped Crane | -6178259.569 | 5932169.635 |
| White-naped Crane | -6228030.513 | 5907137.914 |
| White-naped Crane | -6227987.099 | 5907108.637 |
| White-naped Crane | -5307150.044 | 5861954.187 |
| White-naped Crane | -5814587.698 | 6362279.122 |
| White-naped Crane | -6227713.253 | 5907780.39  |
| White-naped Crane | -5307152.271 | 5861946.097 |
| White-naped Crane | -5813838.518 | 6362277.406 |
| White-naped Crane | -5307187.893 | 5861949.333 |
| White-naped Crane | -6227744.422 | 5907705.568 |
| White-naped Crane | -6177155.28  | 5932404.529 |
| White-naped Crane | -6178356.417 | 5932639.43  |
| White-naped Crane | -6227471.689 | 5908405.021 |
| White-naped Crane | -5810186.125 | 6375627.639 |
| White-naped Crane | -6178364.209 | 5932644.324 |
| White-naped Crane | -5306558.938 | 5866723.745 |
| White-naped Crane | -6226528.813 | 5910576.94  |
| White-naped Crane | -5306529.995 | 5867023.245 |
| White-naped Crane | -5810190.578 | 6375632.796 |
| White-naped Crane | -6178364.209 | 5932650.849 |
| White-naped Crane | -6226534.379 | 5910585.075 |
| White-naped Crane | -5808947.139 | 6373726.511 |
| White-naped Crane | -5306533.334 | 5867054.005 |
| White-naped Crane | -6178448.812 | 5932590.492 |
| White-naped Crane | -5809033.969 | 6373767.761 |
| White-naped Crane | -5306578.975 | 5866963.344 |
| White-naped Crane | -6227945.91  | 5912555.732 |
| White-naped Crane | -6178451.038 | 5932521.979 |
| White-naped Crane | -6228532.564 | 5914880.091 |
| White-naped Crane | -5306869.519 | 5867073.432 |
| White-naped Crane | -6178492.227 | 5932624.748 |



|                   |              |             |
|-------------------|--------------|-------------|
| White-naped Crane | -6178407.624 | 5932322.968 |
| White-naped Crane | -6228455.754 | 5914617.999 |
| White-naped Crane | -5808597.596 | 6372123.096 |
| White-naped Crane | -5307853.584 | 5861599.852 |
| White-naped Crane | -5809300.022 | 6371191.78  |
| White-naped Crane | -5307880.3   | 5861594.998 |
| White-naped Crane | -6225836.406 | 5905407.531 |
| White-naped Crane | -6178356.417 | 5932644.324 |
| White-naped Crane | -6225860.896 | 5905392.895 |
| White-naped Crane | -6178370.888 | 5932647.586 |
| White-naped Crane | -6178514.491 | 5932500.772 |
| White-naped Crane | -6226020.083 | 5905205.892 |
| White-naped Crane | -5303529.935 | 5863501.133 |
| White-naped Crane | -5812547.212 | 6360209.46  |
| White-naped Crane | -5303593.387 | 5863467.149 |
| White-naped Crane | -5813632.577 | 6359667.245 |
| White-naped Crane | -6228164.097 | 5907076.108 |
| White-naped Crane | -5813627.011 | 6359670.677 |
| White-naped Crane | -5303596.726 | 5863460.676 |
| White-naped Crane | -6228135.154 | 5907095.626 |
| White-naped Crane | -5303588.934 | 5863470.386 |
| White-naped Crane | -6228132.927 | 5907110.264 |
| White-naped Crane | -6178350.851 | 5932650.849 |
| White-naped Crane | -5813630.35  | 6359674.108 |
| White-naped Crane | -5303591.16  | 5863467.149 |
| White-naped Crane | -6228140.72  | 5907100.505 |
| White-naped Crane | -6178365.322 | 5932642.692 |
| White-naped Crane | -5813618.105 | 6359632.929 |
| White-naped Crane | -6228139.606 | 5907110.264 |
| White-naped Crane | -5303574.462 | 5863496.278 |
| White-naped Crane | -6178360.87  | 5932645.955 |
| White-naped Crane | -5303584.481 | 5863483.332 |
| White-naped Crane | -6228134.04  | 5907102.132 |
| White-naped Crane | -6178370.888 | 5932634.536 |
| White-naped Crane | -5813631.464 | 6359674.108 |
| White-naped Crane | -5813627.011 | 6359679.256 |
| White-naped Crane | -5303574.462 | 5863486.569 |
| White-naped Crane | -6228129.588 | 5907089.12  |
| White-naped Crane | -6178360.87  | 5932645.955 |
| White-naped Crane | -6228128.474 | 5907085.867 |
| White-naped Crane | -5303575.576 | 5863481.714 |
| White-naped Crane | -5813641.482 | 6359687.835 |
| White-naped Crane | -6178365.322 | 5932650.849 |
| White-naped Crane | -5307820.188 | 5861454.239 |
| White-naped Crane | -6228179.681 | 5906980.148 |
| White-naped Crane | -6178024.685 | 5932538.291 |
| White-naped Crane | -5308035.034 | 5861533.517 |
| White-naped Crane | -6226023.423 | 5905228.657 |
| White-naped Crane | -5811992.841 | 6353473.761 |
| White-naped Crane | -5308379.012 | 5861209.938 |
| White-naped Crane | -6225830.84  | 5905412.409 |
| White-naped Crane | -5307993.846 | 5861572.347 |
| White-naped Crane | -6177310.014 | 5932396.373 |
| White-naped Crane | -5819823.054 | 6359862.85  |
| White-naped Crane | -6228509.187 | 5914971.255 |
| White-naped Crane | -5307260.251 | 5863031.842 |
| White-naped Crane | -6177193.128 | 5932564.391 |
| White-naped Crane | -6228528.111 | 5915024.977 |

|                   |              |             |
|-------------------|--------------|-------------|
| White-naped Crane | -5307239.1   | 5863133.789 |
| White-naped Crane | -6178347.511 | 5932670.424 |
| White-naped Crane | -6228564.847 | 5914982.65  |
| White-naped Crane | -5306572.296 | 5866900.206 |
| White-naped Crane | -6178366.436 | 5932639.43  |
| White-naped Crane | -5820180.389 | 6370731.316 |
| White-naped Crane | -5306635.748 | 5866929.346 |
| White-naped Crane | -6228589.337 | 5914937.068 |
| White-naped Crane | -6178365.322 | 5932637.798 |
| White-naped Crane | -6178359.756 | 5932634.536 |
| White-naped Crane | -6228514.753 | 5914972.883 |
| White-naped Crane | -6228516.979 | 5914972.883 |
| White-naped Crane | -5301685.371 | 5867484.657 |
| White-naped Crane | -6178467.736 | 5932732.413 |
| White-naped Crane | -6178589.075 | 5932882.493 |
| White-naped Crane | -5872816.697 | 6255809.874 |
| White-naped Crane | -6228597.129 | 5915024.977 |
| White-naped Crane | -5302180.742 | 5866702.699 |
| White-naped Crane | -5302190.761 | 5866688.129 |
| White-naped Crane | -6228508.074 | 5914891.486 |
| White-naped Crane | -6178324.134 | 5932884.124 |
| White-naped Crane | -5872302.401 | 6256264.027 |
| White-naped Crane | -5871859.35  | 6255913.242 |
| White-naped Crane | -6228395.641 | 5914645.673 |
| White-naped Crane | -5306469.882 | 5861834.455 |
| White-naped Crane | -5871034.472 | 6248871.853 |
| White-naped Crane | -5307207.931 | 5863093.334 |
| White-naped Crane | -6228274.303 | 5914505.677 |
| White-naped Crane | -6177109.639 | 5932216.94  |
| White-naped Crane | -6177013.904 | 5932205.522 |
| White-naped Crane | -5307286.967 | 5862942.841 |
| White-naped Crane | -5871070.094 | 6248836.296 |
| White-naped Crane | -5871221.489 | 6248924.34  |
| White-naped Crane | -5305911.058 | 5865661.818 |
| White-naped Crane | -6178363.096 | 5932649.217 |
| White-naped Crane | -6228854.277 | 5915490.582 |
| White-naped Crane | -5305938.888 | 5865669.912 |
| White-naped Crane | -5871191.433 | 6249113.977 |
| White-naped Crane | -6228781.92  | 5915288.708 |
| White-naped Crane | -6178377.568 | 5932644.324 |
| White-naped Crane | -5871191.433 | 6249120.749 |
| White-naped Crane | -5305937.775 | 5865666.674 |
| White-naped Crane | -6228784.146 | 5915290.336 |
| White-naped Crane | -6178364.209 | 5932645.955 |
| White-naped Crane | -5305893.247 | 5865655.343 |
| White-naped Crane | -6178364.209 | 5932642.692 |
| White-naped Crane | -6228758.543 | 5915275.684 |
| White-naped Crane | -5871184.754 | 6249120.749 |
| White-naped Crane | -5305838.701 | 5865635.919 |
| White-naped Crane | -6228768.561 | 5915283.824 |
| White-naped Crane | -5871225.942 | 6249091.965 |
| White-naped Crane | -6178365.322 | 5932642.692 |
| White-naped Crane | -5871185.867 | 6249117.363 |
| White-naped Crane | -5305837.588 | 5865635.919 |
| White-naped Crane | -6228764.109 | 5915274.056 |
| White-naped Crane | -6178356.417 | 5932636.167 |
| White-naped Crane | -5305834.248 | 5865635.919 |
| White-naped Crane | -6228790.825 | 5915296.848 |

|                   |              |             |
|-------------------|--------------|-------------|
| White-naped Crane | -6178360.87  | 5932644.324 |
| White-naped Crane | -5305838.701 | 5865631.063 |
| White-naped Crane | -6228766.335 | 5915278.94  |
| White-naped Crane | -5871189.206 | 6249119.056 |
| White-naped Crane | -6178355.304 | 5932644.324 |
| White-naped Crane | -5872537.285 | 6250993.64  |
| White-naped Crane | -6228787.486 | 5915288.708 |
| White-naped Crane | -5305816.437 | 5865619.732 |
| White-naped Crane | -6178356.417 | 5932654.111 |
| White-naped Crane | -5277955.395 | 5876786.124 |
| White-naped Crane | -6228783.033 | 5915288.708 |
| White-naped Crane | -6178364.209 | 5932652.48  |
| White-naped Crane | -6228784.146 | 5915301.732 |
| White-naped Crane | -5871095.698 | 6248704.232 |
| White-naped Crane | -6178476.642 | 5932551.341 |
| White-naped Crane | -5870900.889 | 6246740.446 |
| White-naped Crane | -6226028.989 | 5905214.022 |
| White-naped Crane | -5304729.959 | 5867418.277 |
| White-naped Crane | -6177384.598 | 5931926.592 |
| White-naped Crane | -6225641.597 | 5905453.063 |
| White-naped Crane | -5304804.543 | 5867468.466 |
| White-naped Crane | -5870994.397 | 6246708.285 |
| White-naped Crane | -5870965.454 | 6246716.748 |
| White-naped Crane | -5304536.263 | 5867559.132 |
| White-naped Crane | -6227161.108 | 5904740.84  |
| White-naped Crane | -6177369.013 | 5932590.492 |
| White-naped Crane | -6227168.9   | 5904742.466 |
| White-naped Crane | -5304721.053 | 5867405.324 |
| White-naped Crane | -6177405.748 | 5933411.057 |
| White-naped Crane | -5871754.709 | 6248780.423 |
| White-naped Crane | -6227156.655 | 5904905.069 |
| White-naped Crane | -5302305.42  | 5866176.577 |
| White-naped Crane | -6177200.921 | 5933500.786 |
| White-naped Crane | -5279271.191 | 5876066.532 |
| White-naped Crane | -6225551.428 | 5905072.553 |
| White-naped Crane | -5881209.074 | 6254927.057 |
| White-naped Crane | -5302326.571 | 5866199.24  |
| White-naped Crane | -5302338.816 | 5866194.384 |
| White-naped Crane | -6225453.467 | 5905022.145 |
| White-naped Crane | -5879435.754 | 6253503.902 |
| White-naped Crane | -6177294.429 | 5933257.705 |
| White-naped Crane | -6227526.236 | 5904979.867 |
| White-naped Crane | -5300054.54  | 5866692.986 |
| White-naped Crane | -5878483.973 | 6254113.796 |
| White-naped Crane | -6177312.24  | 5933123.932 |
| White-naped Crane | -6225473.505 | 5905105.074 |
| White-naped Crane | -6177268.825 | 5933148.402 |
| White-naped Crane | -5307379.363 | 5862567.431 |
| White-naped Crane | -5875077.596 | 6257741.89  |
| White-naped Crane | -6178358.643 | 5932639.43  |
| White-naped Crane | -5872212.232 | 6257507.99  |
| White-naped Crane | -5306909.594 | 5866152.296 |
| White-naped Crane | -6225255.318 | 5905148.979 |
| White-naped Crane | -6178361.983 | 5932637.798 |
| White-naped Crane | -5306741.502 | 5866607.186 |
| White-naped Crane | -6225074.981 | 5905178.248 |
| White-naped Crane | -5870857.474 | 6246503.469 |
| White-naped Crane | -6178354.19  | 5932632.905 |

|                   |              |             |
|-------------------|--------------|-------------|
| White-naped Crane | -5870969.907 | 6246708.285 |
| White-naped Crane | -5306690.295 | 5866498.722 |
| White-naped Crane | -6225141.772 | 5905223.779 |
| White-naped Crane | -6178398.718 | 5932634.536 |
| White-naped Crane | -5278001.036 | 5876666.188 |
| White-naped Crane | -6227301.371 | 5904659.54  |
| White-naped Crane | -5870933.172 | 6246691.358 |
| White-naped Crane | -5306741.502 | 5866613.661 |
| White-naped Crane | -6177258.807 | 5932236.514 |
| White-naped Crane | -5306738.162 | 5866599.091 |
| White-naped Crane | -5871131.32  | 6248150.601 |
| White-naped Crane | -6227282.446 | 5904670.922 |
| White-naped Crane | -6178366.436 | 5932642.692 |
| White-naped Crane | -5306737.049 | 5866605.567 |
| White-naped Crane | -6227299.144 | 5904648.158 |
| White-naped Crane | -6178367.549 | 5932641.061 |
| White-naped Crane | -5871804.803 | 6248841.376 |
| White-naped Crane | -5306739.275 | 5866605.567 |
| White-naped Crane | -6227223.447 | 5904636.776 |
| White-naped Crane | -5306740.389 | 5866608.805 |
| White-naped Crane | -6227216.768 | 5904644.906 |
| White-naped Crane | -6178364.209 | 5932647.586 |
| White-naped Crane | -5306742.615 | 5866612.042 |
| White-naped Crane | -6227220.107 | 5904640.028 |
| White-naped Crane | -5871789.218 | 6248849.842 |
| White-naped Crane | -6178376.454 | 5932641.061 |
| White-naped Crane | -5871790.332 | 6248844.762 |
| White-naped Crane | -5306739.275 | 5866607.186 |
| White-naped Crane | -6227217.881 | 5904635.15  |
| White-naped Crane | -6178367.549 | 5932631.273 |
| White-naped Crane | -5871801.464 | 6248858.307 |
| White-naped Crane | -5306743.728 | 5866605.567 |
| White-naped Crane | -6227294.691 | 5904748.97  |
| White-naped Crane | -6178374.228 | 5932634.536 |
| White-naped Crane | -5871788.105 | 6248851.535 |
| White-naped Crane | -6227293.578 | 5904748.97  |
| White-naped Crane | -6178356.417 | 5932634.536 |
| White-naped Crane | -6225191.866 | 5905225.405 |
| White-naped Crane | -5307362.665 | 5862538.305 |
| White-naped Crane | -6178429.888 | 5932468.148 |
| White-naped Crane | -5870834.097 | 6246845.396 |
| White-naped Crane | -6225168.489 | 5905199.388 |
| White-naped Crane | -6177185.336 | 5932137.012 |
| White-naped Crane | -5307681.038 | 5862429.892 |
| White-naped Crane | -5307341.514 | 5862541.541 |
| White-naped Crane | -6225310.978 | 5905233.536 |
| White-naped Crane | -6177001.659 | 5932327.862 |
| White-naped Crane | -5307122.215 | 5861870.051 |
| White-naped Crane | -6177291.089 | 5933353.958 |
| White-naped Crane | -6226305.061 | 5905033.527 |
| White-naped Crane | -5307288.081 | 5861646.772 |
| White-naped Crane | -6225798.557 | 5905251.423 |
| White-naped Crane | -5870986.605 | 6246913.106 |
| White-naped Crane | -6177186.449 | 5933274.019 |
| White-naped Crane | -5871137.999 | 6248118.434 |
| White-naped Crane | -5307192.346 | 5861282.742 |
| White-naped Crane | -6227133.278 | 5904581.492 |
| White-naped Crane | -6177101.846 | 5933760.188 |

|                   |              |             |
|-------------------|--------------|-------------|
| White-naped Crane | -5307156.724 | 5861242.296 |
| White-naped Crane | -6177049.526 | 5933592.147 |
| White-naped Crane | -5873309.843 | 6263242.103 |
| White-naped Crane | -6227084.298 | 5904591.248 |
| White-naped Crane | -5280159.521 | 5875056.936 |
| White-naped Crane | -5873532.482 | 6263415.103 |
| White-naped Crane | -6177434.691 | 5933158.191 |
| White-naped Crane | -5307537.436 | 5861434.824 |
| White-naped Crane | -6226345.136 | 5905018.893 |
| White-naped Crane | -5307151.158 | 5861269.799 |
| White-naped Crane | -6228503.621 | 5907001.292 |
| White-naped Crane | -6178361.983 | 5932626.38  |
| White-naped Crane | -6228504.734 | 5906996.413 |
| White-naped Crane | -6178361.983 | 5932649.217 |
| White-naped Crane | -5881784.595 | 6323954.042 |
| White-naped Crane | -5307209.044 | 5861292.45  |
| White-naped Crane | -6228506.961 | 5906999.665 |
| White-naped Crane | -6178366.436 | 5932644.324 |
| White-naped Crane | -5307837.999 | 5861389.523 |
| White-naped Crane | -6178365.322 | 5932649.217 |
| White-naped Crane | -5278077.846 | 5876601.358 |
| White-naped Crane | -5881747.86  | 6323918.165 |
| White-naped Crane | -5307785.679 | 5861357.165 |
| White-naped Crane | -6228539.243 | 5906864.672 |
| White-naped Crane | -6178364.209 | 5932632.905 |
| White-naped Crane | -5881273.639 | 6323943.791 |
| White-naped Crane | -5307770.094 | 5861501.158 |
| White-naped Crane | -6228502.508 | 5906996.413 |
| White-naped Crane | -6178366.436 | 5932652.48  |
| White-naped Crane | -5306968.594 | 5866263.992 |
| White-naped Crane | -6177151.94  | 5933691.666 |
| White-naped Crane | -6228441.282 | 5907090.746 |
| White-naped Crane | -5306916.273 | 5866573.189 |
| White-naped Crane | -6176811.302 | 5933714.507 |
| White-naped Crane | -6228493.602 | 5907093.999 |
| White-naped Crane | -5881861.406 | 6324205.188 |
| White-naped Crane | -5306841.689 | 5866628.231 |
| White-naped Crane | -5881869.198 | 6324198.354 |
| White-naped Crane | -6228434.603 | 5906898.827 |
| White-naped Crane | -6178363.096 | 5932642.692 |
| White-naped Crane | -5881861.406 | 6324206.897 |
| White-naped Crane | -5306838.35  | 5866634.706 |
| White-naped Crane | -6228534.791 | 5906869.551 |
| White-naped Crane | -6178360.87  | 5932641.061 |
| White-naped Crane | -5306836.123 | 5866634.706 |
| White-naped Crane | -6228535.904 | 5906877.684 |
| White-naped Crane | -6178343.059 | 5932650.849 |
| White-naped Crane | -5881856.953 | 6324210.314 |
| White-naped Crane | -6228541.47  | 5906884.189 |
| White-naped Crane | -5306837.237 | 5866637.944 |
| White-naped Crane | -6178363.096 | 5932642.692 |
| White-naped Crane | -6228545.922 | 5906880.936 |
| White-naped Crane | -5306839.463 | 5866642.801 |
| White-naped Crane | -6178364.209 | 5932642.692 |
| White-naped Crane | -5881859.18  | 6324191.52  |
| White-naped Crane | -5306839.463 | 5866636.325 |
| White-naped Crane | -6228542.583 | 5906877.684 |
| White-naped Crane | -6178357.53  | 5932642.692 |

|                   |              |             |
|-------------------|--------------|-------------|
| White-naped Crane | -6228540.357 | 5906872.804 |
| White-naped Crane | -5306797.162 | 5866620.137 |
| White-naped Crane | -5881861.406 | 6324188.103 |
| White-naped Crane | -6178364.209 | 5932634.536 |
| White-naped Crane | -5306788.256 | 5866590.997 |
| White-naped Crane | -5881854.727 | 6324191.52  |
| White-naped Crane | -6228540.357 | 5906876.057 |
| White-naped Crane | -6178364.209 | 5932636.167 |
| White-naped Crane | -6228553.715 | 5907085.867 |
| White-naped Crane | -6177560.483 | 5933221.814 |
| White-naped Crane | -5307150.044 | 5862811.769 |
| White-naped Crane | -5882206.496 | 6324085.594 |
| White-naped Crane | -6176792.378 | 5933787.924 |
| White-naped Crane | -5307115.535 | 5862755.134 |
| White-naped Crane | -6225369.977 | 5905197.761 |
| White-naped Crane | -5307606.454 | 5862614.356 |
| White-naped Crane | -5881723.37  | 6323936.958 |
| White-naped Crane | -6225217.47  | 5905179.874 |
| White-naped Crane | -6176776.793 | 5933647.616 |
| White-naped Crane | -6225247.526 | 5905174.996 |
| White-naped Crane | -5881694.427 | 6323960.876 |
| White-naped Crane | -6176639.87  | 5933660.668 |
| White-naped Crane | -5307071.008 | 5863124.08  |
| White-naped Crane | -5307193.459 | 5863460.676 |
| White-naped Crane | -6228486.923 | 5906994.786 |
| White-naped Crane | -6176825.774 | 5933902.129 |
| White-naped Crane | -6228604.922 | 5907105.384 |
| White-naped Crane | -5306811.633 | 5863459.058 |
| White-naped Crane | -6177004.998 | 5933823.817 |
| White-naped Crane | -5883642.518 | 6324259.861 |
| White-naped Crane | -5883482.218 | 6324324.784 |
| White-naped Crane | -5306993.084 | 5863331.215 |
| White-naped Crane | -6176883.66  | 5933562.781 |
| White-naped Crane | -6228462.433 | 5907107.011 |
| White-naped Crane | -5307164.516 | 5863480.095 |
| White-naped Crane | -5881520.768 | 6323909.623 |
| White-naped Crane | -6176950.452 | 5933673.72  |
| White-naped Crane | -6228294.34  | 5907077.735 |
| White-naped Crane | -6228180.795 | 5907048.459 |
| White-naped Crane | -6177350.089 | 5933287.07  |
| White-naped Crane | -5882271.062 | 6324051.424 |
| White-naped Crane | -6228512.527 | 5906952.499 |
| White-naped Crane | -6177082.922 | 5931613.419 |
| White-naped Crane | -5306422.015 | 5863465.531 |
| White-naped Crane | -5882275.514 | 6324070.218 |
| White-naped Crane | -6177790.914 | 5931911.912 |
| White-naped Crane | -5306466.543 | 5863447.73  |
| White-naped Crane | -6229062.445 | 5906796.363 |
| White-naped Crane | -5882253.251 | 6324051.424 |
| White-naped Crane | -5306174.886 | 5865739.516 |
| White-naped Crane | -6229204.934 | 5906680.89  |
| White-naped Crane | -6178360.87  | 5932637.798 |
| White-naped Crane | -5306192.697 | 5865627.826 |
| White-naped Crane | -6228503.621 | 5907082.614 |
| White-naped Crane | -6178363.096 | 5932636.167 |
| White-naped Crane | -5303521.029 | 5866935.822 |
| White-naped Crane | -6228167.436 | 5907092.373 |
| White-naped Crane | -5881950.462 | 6324007.004 |

|                   |              |             |
|-------------------|--------------|-------------|
| White-naped Crane | -6178360.87  | 5932642.692 |
| White-naped Crane | -5881707.785 | 6324147.099 |
| White-naped Crane | -6228269.85  | 5907056.591 |
| White-naped Crane | -6178360.87  | 5932636.167 |
| White-naped Crane | -5300346.197 | 5860603.261 |
| White-naped Crane | -5879009.401 | 6323516.69  |
| White-naped Crane | -6178358.643 | 5932644.324 |
| White-naped Crane | -6226034.555 | 5905218.901 |
| White-naped Crane | -5879554.866 | 6323504.732 |
| White-naped Crane | -5300731.363 | 5863703.422 |
| White-naped Crane | -6227987.099 | 5907107.011 |
| White-naped Crane | -6178490     | 5932504.035 |
| White-naped Crane | -5883488.897 | 6324358.955 |
| White-naped Crane | -6228138.493 | 5907097.252 |
| White-naped Crane | -6178503.359 | 5932433.892 |
| White-naped Crane | -5300735.815 | 5863708.277 |
| White-naped Crane | -5883488.897 | 6324343.578 |
| White-naped Crane | -5300733.589 | 5863727.697 |
| White-naped Crane | -6178343.059 | 5932650.849 |
| White-naped Crane | -6228136.267 | 5907108.637 |
| White-naped Crane | -5883488.897 | 6324364.081 |
| White-naped Crane | -5300733.589 | 5863727.697 |
| White-naped Crane | -6228145.172 | 5907103.758 |
| White-naped Crane | -6178369.775 | 5932647.586 |
| White-naped Crane | -6228140.72  | 5907100.505 |
| White-naped Crane | -5300735.815 | 5863734.17  |
| White-naped Crane | -5883493.35  | 6324358.955 |
| White-naped Crane | -6178354.19  | 5932626.38  |
| White-naped Crane | -5300749.174 | 5863732.552 |
| White-naped Crane | -6228140.72  | 5907098.879 |
| White-naped Crane | -6178356.417 | 5932634.536 |
| White-naped Crane | -5883477.765 | 6324379.457 |
| White-naped Crane | -6228142.946 | 5907102.132 |
| White-naped Crane | -5300742.495 | 5863730.933 |
| White-naped Crane | -5883486.67  | 6324360.663 |
| White-naped Crane | -6178363.096 | 5932642.692 |
| White-naped Crane | -5883484.444 | 6324353.829 |
| White-naped Crane | -5300731.363 | 5863680.765 |
| White-naped Crane | -6228138.493 | 5907102.132 |
| White-naped Crane | -6178358.643 | 5932634.536 |
| White-naped Crane | -5300771.438 | 5863643.544 |
| White-naped Crane | -6228178.568 | 5907056.591 |
| White-naped Crane | -6178456.604 | 5932572.548 |
| White-naped Crane | -5878911.439 | 6323328.773 |
| White-naped Crane | -6225992.253 | 5905161.987 |
| White-naped Crane | -5304380.415 | 5866686.511 |
| White-naped Crane | -5879018.306 | 6323438.106 |
| White-naped Crane | -6177826.536 | 5931996.731 |
| White-naped Crane | -5278003.262 | 5876562.461 |
| White-naped Crane | -6177942.308 | 5932388.217 |
| White-naped Crane | -5307016.461 | 5862719.535 |
| White-naped Crane | -5879232.04  | 6323653.36  |
| White-naped Crane | -6228002.683 | 5907118.396 |
| White-naped Crane | -6177285.523 | 5932282.188 |
| White-naped Crane | -5879579.356 | 6323518.399 |
| White-naped Crane | -5306807.18  | 5862971.969 |
| White-naped Crane | -5306680.276 | 5866846.781 |
| White-naped Crane | -5879445.773 | 6323566.233 |

|                   |              |             |
|-------------------|--------------|-------------|
| White-naped Crane | -6228009.363 | 5907111.89  |
| White-naped Crane | -6178171.627 | 5932505.666 |
| White-naped Crane | -6178222.833 | 5932616.592 |
| White-naped Crane | -5306949.669 | 5866581.284 |
| White-naped Crane | -6228009.363 | 5907108.637 |
| White-naped Crane | -6228505.847 | 5906991.533 |
| White-naped Crane | -6178033.59  | 5932771.564 |
| White-naped Crane | -6178051.401 | 5933083.148 |
| White-naped Crane | -5981536.878 | 6343050.812 |
| White-naped Crane | -6228525.885 | 5914984.278 |
| White-naped Crane | -5307105.517 | 5863031.842 |
| White-naped Crane | -5307141.139 | 5862685.554 |
| White-naped Crane | -6228548.149 | 5915023.349 |
| White-naped Crane | -6178251.777 | 5933198.975 |
| White-naped Crane | -6046062.108 | 6340133.428 |
| White-naped Crane | -5307437.249 | 5866519.767 |
| White-naped Crane | -6045988.637 | 6340177.934 |
| White-naped Crane | -6228545.922 | 5915021.721 |
| White-naped Crane | -6178038.043 | 5933205.501 |
| White-naped Crane | -6046017.58  | 6340143.698 |
| White-naped Crane | -5307383.815 | 5866586.14  |
| White-naped Crane | -6178176.079 | 5933158.191 |
| White-naped Crane | -6228545.922 | 5915002.185 |
| White-naped Crane | -5307372.683 | 5866539.193 |
| White-naped Crane | -6058908.377 | 6332251.001 |
| White-naped Crane | -6228550.375 | 5914982.65  |
| White-naped Crane | -6178156.042 | 5933197.344 |
| White-naped Crane | -6059721.009 | 6331914.107 |
| White-naped Crane | -5307530.757 | 5866471.202 |
| White-naped Crane | -6228543.696 | 5915003.813 |
| White-naped Crane | -6178369.775 | 5932637.798 |
| White-naped Crane | -6059700.972 | 6331917.527 |
| White-naped Crane | -6228530.338 | 5914981.022 |
| White-naped Crane | -6178360.87  | 5932641.061 |
| White-naped Crane | -5307352.646 | 5866531.099 |
| White-naped Crane | -6059647.538 | 6332050.915 |
| White-naped Crane | -5307348.193 | 5866542.431 |
| White-naped Crane | -6178360.87  | 5932650.849 |
| White-naped Crane | -5306849.482 | 5866649.276 |
| White-naped Crane | -6059700.972 | 6332071.436 |
| White-naped Crane | -6178365.322 | 5932644.324 |
| White-naped Crane | -5306740.389 | 5866613.661 |
| White-naped Crane | -6178374.228 | 5932642.692 |
| White-naped Crane | -6228145.172 | 5914741.718 |
| White-naped Crane | -6059594.105 | 6331837.153 |
| White-naped Crane | -6059594.105 | 6331838.863 |
| White-naped Crane | -5306738.162 | 5866608.805 |
| White-naped Crane | -6228145.172 | 5914733.579 |
| White-naped Crane | -6178360.87  | 5932637.798 |
| White-naped Crane | -5306738.162 | 5866603.948 |
| White-naped Crane | -6059562.935 | 6331828.603 |
| White-naped Crane | -6178365.322 | 5932639.43  |
| White-naped Crane | -6228140.72  | 5914762.881 |
| White-naped Crane | -6059574.067 | 6331818.342 |
| White-naped Crane | -5306738.162 | 5866610.423 |
| White-naped Crane | -6228149.625 | 5914722.184 |
| White-naped Crane | -6178363.096 | 5932644.324 |
| White-naped Crane | -6059589.652 | 6331826.893 |



|                   |              |             |
|-------------------|--------------|-------------|
| White-naped Crane | -5306747.068 | 5866610.423 |
| White-naped Crane | -6228156.304 | 5914733.579 |
| White-naped Crane | -6178365.322 | 5932650.849 |
| White-naped Crane | -5306744.841 | 5866610.423 |
| White-naped Crane | -6228145.172 | 5914733.579 |
| White-naped Crane | -6059578.52  | 6331826.893 |
| White-naped Crane | -6178363.096 | 5932649.217 |
| White-naped Crane | -5306747.068 | 5866613.661 |
| White-naped Crane | -6228154.078 | 5914731.951 |
| White-naped Crane | -6059580.747 | 6331818.342 |
| White-naped Crane | -6178372.002 | 5932650.849 |
| White-naped Crane | -6059560.709 | 6331828.603 |
| White-naped Crane | -6228154.078 | 5914723.812 |
| White-naped Crane | -5306744.841 | 5866607.186 |
| White-naped Crane | -6178363.096 | 5932641.061 |
| White-naped Crane | -5307081.026 | 5862641.864 |
| White-naped Crane | -6226018.97  | 5916892.435 |
| White-naped Crane | -6059618.595 | 6332015.002 |
| White-naped Crane | -6178291.852 | 5932482.829 |
| White-naped Crane | -6059647.538 | 6332081.697 |
| White-naped Crane | -6226030.102 | 5905205.892 |
| White-naped Crane | -6178176.079 | 5932508.929 |
| White-naped Crane | -6059616.369 | 6331826.893 |
| White-naped Crane | -5307063.215 | 5862905.623 |
| White-naped Crane | -6225927.688 | 5905280.693 |
| White-naped Crane | -6177419.107 | 5932282.188 |
| White-naped Crane | -6059591.879 | 6332095.378 |
| White-naped Crane | -5306898.462 | 5866560.239 |
| White-naped Crane | -6177374.579 | 5932278.925 |
| White-naped Crane | -6225756.256 | 5905448.184 |
| White-naped Crane | -6059843.461 | 6331236.94  |
| White-naped Crane | -6228585.997 | 5915031.488 |
| White-naped Crane | -5306787.143 | 5866597.472 |
| White-naped Crane | -6177232.09  | 5932228.358 |
| White-naped Crane | -5306902.915 | 5866586.14  |
| White-naped Crane | -6177719.669 | 5932659.005 |
| White-naped Crane | -6228543.696 | 5915007.069 |
| White-naped Crane | -5307902.564 | 5861266.564 |
| White-naped Crane | -6062570.788 | 6328395.492 |
| White-naped Crane | -6228585.997 | 5915021.721 |
| White-naped Crane | -6177744.16  | 5932655.742 |
| White-naped Crane | -5307635.397 | 5861273.035 |
| White-naped Crane | -6228528.111 | 5914925.672 |
| White-naped Crane | -6177726.349 | 5932662.268 |
| White-naped Crane | -5307263.59  | 5861358.783 |
| White-naped Crane | -6178367.549 | 5932634.536 |
| White-naped Crane | -5307043.178 | 5866498.722 |
| White-naped Crane | -6228223.096 | 5916228.114 |
| White-naped Crane | -6178369.775 | 5932634.536 |
| White-naped Crane | -6178367.549 | 5932641.061 |
| White-naped Crane | -5306967.48  | 5866696.224 |
| White-naped Crane | -6228334.415 | 5917177.392 |
| White-naped Crane | -5961519.407 | 6159925.988 |
| White-naped Crane | -6178365.322 | 5932641.061 |
| White-naped Crane | -5306894.01  | 5866667.084 |
| White-naped Crane | -6228826.448 | 5916176.013 |
| White-naped Crane | -5306867.293 | 5866688.129 |
| White-naped Crane | -6178363.096 | 5932639.43  |

|                   |              |             |
|-------------------|--------------|-------------|
| White-naped Crane | -6228630.525 | 5915734.791 |
| White-naped Crane | -5961212.165 | 6160572.69  |
| White-naped Crane | -6178449.925 | 5932673.687 |
| White-naped Crane | -5306891.783 | 5866702.699 |
| White-naped Crane | -6228365.585 | 5915459.65  |
| White-naped Crane | -5307844.678 | 5861035.211 |
| White-naped Crane | -5959317.508 | 6160815.636 |
| White-naped Crane | -6178514.491 | 5932787.877 |
| White-naped Crane | -6228053.89  | 5914593.581 |
| White-naped Crane | -5303253.862 | 5863232.501 |
| White-naped Crane | -6228318.831 | 5907082.614 |
| White-naped Crane | -6178349.738 | 5932637.798 |
| White-naped Crane | -5306853.935 | 5866644.42  |
| White-naped Crane | -6178363.096 | 5932631.273 |
| White-naped Crane | -5955871.056 | 6159006.281 |
| White-naped Crane | -5955864.377 | 6158999.581 |
| White-naped Crane | -5306851.708 | 5866636.325 |
| White-naped Crane | -6178363.096 | 5932632.905 |
| White-naped Crane | -6228162.983 | 5907074.482 |
| White-naped Crane | -5955864.377 | 6159021.358 |
| White-naped Crane | -5306851.708 | 5866644.42  |
| White-naped Crane | -6178363.096 | 5932637.798 |
| White-naped Crane | -6228165.21  | 5907084.241 |
| White-naped Crane | -5306851.708 | 5866647.657 |
| White-naped Crane | -6228142.946 | 5907110.264 |
| White-naped Crane | -5955871.056 | 6159009.632 |
| White-naped Crane | -6178372.002 | 5932642.692 |
| White-naped Crane | -5955868.83  | 6159011.307 |
| White-naped Crane | -5306856.161 | 5866652.514 |
| White-naped Crane | -6228142.946 | 5907108.637 |
| White-naped Crane | -6178360.87  | 5932645.955 |
| White-naped Crane | -5955857.698 | 6159012.982 |
| White-naped Crane | -5306853.935 | 5866649.276 |
| White-naped Crane | -6228138.493 | 5907102.132 |
| White-naped Crane | -6178367.549 | 5932631.273 |
| White-naped Crane | -6228136.267 | 5907102.132 |
| White-naped Crane | -5306856.161 | 5866646.039 |
| White-naped Crane | -5955868.83  | 6159019.682 |
| White-naped Crane | -6178354.19  | 5932637.798 |
| White-naped Crane | -5306862.84  | 5866646.039 |
| White-naped Crane | -6228140.72  | 5907093.999 |
| White-naped Crane | -5955866.603 | 6158994.555 |
| White-naped Crane | -6178356.417 | 5932647.586 |
| White-naped Crane | -5952705.13  | 6159807.04  |
| White-naped Crane | -6226023.423 | 5905197.761 |
| White-naped Crane | -5307860.263 | 5861404.084 |
| White-naped Crane | -6178423.209 | 5932520.347 |
| White-naped Crane | -6178443.246 | 5932207.153 |
| White-naped Crane | -6226132.516 | 5905163.613 |
| White-naped Crane | -5307504.04  | 5861103.16  |
| White-naped Crane | -5307630.945 | 5861284.36  |
| White-naped Crane | -6226210.44  | 5905049.788 |
| White-naped Crane | -6177546.011 | 5931615.05  |
| White-naped Crane | -5953027.956 | 6158215.648 |
| White-naped Crane | -5306212.734 | 5861064.332 |
| White-naped Crane | -6226174.817 | 5905041.657 |
| White-naped Crane | -5953388.632 | 6157394.942 |
| White-naped Crane | -5306157.075 | 5861148.46  |

|                   |              |             |
|-------------------|--------------|-------------|
| White-naped Crane | -6227192.277 | 5904674.174 |
| White-naped Crane | -6177764.197 | 5932543.185 |
| White-naped Crane | -5953388.632 | 6157389.918 |
| White-naped Crane | -6227216.768 | 5904879.052 |
| White-naped Crane | -5306045.755 | 5861007.708 |
| White-naped Crane | -6228552.602 | 5914984.278 |
| White-naped Crane | -6177717.443 | 5932659.005 |
| White-naped Crane | -6178354.19  | 5932647.586 |
| White-naped Crane | -6228514.753 | 5914981.022 |
| White-naped Crane | -5307274.722 | 5866658.99  |
| White-naped Crane | -5280157.294 | 5873768.777 |
| White-naped Crane | -6228572.639 | 5915021.721 |
| White-naped Crane | -6178369.775 | 5932641.061 |
| White-naped Crane | -5279549.49  | 5875928.78  |
| White-naped Crane | -5280157.294 | 5873827.104 |
| White-naped Crane | -5928232.653 | 6254977.889 |
| White-naped Crane | -6228516.979 | 5914982.65  |
| White-naped Crane | -6178358.643 | 5932650.849 |
| White-naped Crane | -5928457.518 | 6254840.644 |
| White-naped Crane | -5279549.49  | 5875941.744 |
| White-naped Crane | -5280146.162 | 5873784.979 |
| White-naped Crane | -6228534.791 | 5915028.233 |
| White-naped Crane | -6178360.87  | 5932642.692 |
| White-naped Crane | -5928372.916 | 6254803.369 |
| White-naped Crane | -5280108.314 | 5874028.013 |
| White-naped Crane | -6226479.833 | 5915090.095 |
| White-naped Crane | -6178367.549 | 5932623.117 |
| White-naped Crane | -5277993.243 | 5875018.045 |
| White-naped Crane | -6226586.699 | 5915143.818 |
| White-naped Crane | -6178367.549 | 5932637.798 |
| White-naped Crane | -5928343.972 | 6262957.17  |
| White-naped Crane | -5276969.104 | 5876841.23  |
| White-naped Crane | -6178363.096 | 5932641.061 |
| White-naped Crane | -6226684.661 | 5914762.881 |
| White-naped Crane | -5277997.696 | 5876991.964 |
| White-naped Crane | -6228131.814 | 5914746.602 |
| White-naped Crane | -6178374.228 | 5932659.005 |
| White-naped Crane | -5927159.533 | 6265477.811 |
| White-naped Crane | -6228476.904 | 5906898.827 |
| White-naped Crane | -5278516.445 | 5878184.961 |
| White-naped Crane | -6178369.775 | 5932645.955 |
| White-naped Crane | -5278509.766 | 5878184.961 |
| White-naped Crane | -5926990.327 | 6265430.308 |
| White-naped Crane | -6178211.702 | 5932784.614 |
| White-naped Crane | -6228414.565 | 5906867.925 |
| White-naped Crane | -5927337.644 | 6265340.394 |
| White-naped Crane | -5278509.766 | 5878189.824 |
| White-naped Crane | -6228421.245 | 5906906.959 |
| White-naped Crane | -6178356.417 | 5932632.905 |
| White-naped Crane | -5278511.992 | 5878196.308 |
| White-naped Crane | -6178349.738 | 5932645.955 |
| White-naped Crane | -6228425.697 | 5906908.585 |
| White-naped Crane | -5927326.512 | 6265348.877 |
| White-naped Crane | -5278507.539 | 5878202.792 |
| White-naped Crane | -6228430.15  | 5906911.838 |
| White-naped Crane | -6178365.322 | 5932644.324 |
| White-naped Crane | -5927326.512 | 6265357.359 |
| White-naped Crane | -5278511.992 | 5878206.034 |

|                   |              |             |
|-------------------|--------------|-------------|
| White-naped Crane | -6228479.131 | 5906887.442 |
| White-naped Crane | -6178369.775 | 5932641.061 |
| White-naped Crane | -5927339.871 | 6265352.27  |
| White-naped Crane | -5278518.671 | 5878191.445 |
| White-naped Crane | -6228467.999 | 5906887.442 |
| White-naped Crane | -6178363.096 | 5932632.905 |
| White-naped Crane | -6228474.678 | 5906887.442 |
| White-naped Crane | -5927328.739 | 6265374.324 |
| White-naped Crane | -5278498.634 | 5878199.55  |
| White-naped Crane | -6178427.661 | 5932678.58  |
| White-naped Crane | -5927339.871 | 6265372.627 |
| White-naped Crane | -5278505.313 | 5878194.687 |
| White-naped Crane | -6228474.678 | 5906882.563 |
| White-naped Crane | -6178378.681 | 5932642.692 |
| White-naped Crane | -6226032.328 | 5905217.275 |
| White-naped Crane | -6178385.36  | 5932513.822 |
| White-naped Crane | -5277890.829 | 5876828.264 |
| White-naped Crane | -6225197.432 | 5905201.014 |
| White-naped Crane | -6178345.285 | 5932425.735 |
| White-naped Crane | -5925988.452 | 6268939.417 |
| White-naped Crane | -5277053.707 | 5877006.552 |
| White-naped Crane | -6228191.926 | 5907072.855 |
| White-naped Crane | -5919407.244 | 6272770.915 |
| White-naped Crane | -6227984.872 | 5907120.023 |
| White-naped Crane | -5277129.404 | 5877121.63  |
| White-naped Crane | -6227982.646 | 5907110.264 |
| White-naped Crane | -5277187.29  | 5877189.705 |
| White-naped Crane | -6228027.174 | 5907139.54  |
| White-naped Crane | -5277844.075 | 5876889.854 |
| White-naped Crane | -5277723.85  | 5876936.857 |
| White-naped Crane | -6227991.551 | 5907108.637 |
| White-naped Crane | -5277832.943 | 5877030.864 |
| White-naped Crane | -5278425.163 | 5878196.308 |
| White-naped Crane | -6228058.343 | 5907136.287 |
| White-naped Crane | -5807092.557 | 6343073.073 |
| White-naped Crane | -5278431.842 | 5878191.445 |
| White-naped Crane | -6228214.19  | 5907074.482 |
| White-naped Crane | -5278391.767 | 5878363.276 |
| White-naped Crane | -6228499.168 | 5906991.533 |
| White-naped Crane | -5278645.576 | 5878191.445 |
| White-naped Crane | -5803419.014 | 6346130.242 |
| White-naped Crane | -6228503.621 | 5906985.027 |
| White-naped Crane | -6228439.056 | 5906869.551 |
| White-naped Crane | -5807415.383 | 6352967.989 |
| White-naped Crane | -6177855.479 | 5932838.448 |
| White-naped Crane | -5278124.6   | 5876833.127 |
| White-naped Crane | -5807232.819 | 6353232.015 |
| White-naped Crane | -6177786.461 | 5933061.94  |
| White-naped Crane | -5278064.488 | 5876875.267 |
| White-naped Crane | -6228501.395 | 5907076.108 |
| White-naped Crane | -5278017.734 | 5876841.23  |
| White-naped Crane | -5807321.875 | 6353202.869 |
| White-naped Crane | -6228140.72  | 5907105.384 |
| White-naped Crane | -6177802.046 | 5933107.618 |
| White-naped Crane | -5277950.942 | 5876831.506 |
| White-naped Crane | -5278525.351 | 5877405.28  |
| White-naped Crane | -6226014.517 | 5905227.031 |
| White-naped Crane | -5807402.025 | 6352978.276 |

|                   |              |             |
|-------------------|--------------|-------------|
| White-naped Crane | -6177786.461 | 5933241.391 |
| White-naped Crane | -5278560.973 | 5877552.782 |
| White-naped Crane | -5807413.157 | 6353226.872 |
| White-naped Crane | -6178360.87  | 5932637.798 |
| White-naped Crane | -6226580.02  | 5904666.044 |
| White-naped Crane | -5807410.93  | 6353204.584 |
| White-naped Crane | -6226582.247 | 5904662.792 |
| White-naped Crane | -5278558.746 | 5877526.847 |
| White-naped Crane | -6178363.096 | 5932647.586 |
| White-naped Crane | -5807393.119 | 6353204.584 |
| White-naped Crane | -5278567.652 | 5877546.298 |
| White-naped Crane | -6178356.417 | 5932641.061 |
| White-naped Crane | -6226517.681 | 5904779.864 |
| White-naped Crane | -5278572.105 | 5877547.919 |
| White-naped Crane | -6226515.455 | 5904799.377 |
| White-naped Crane | -5807422.062 | 6353216.585 |
| White-naped Crane | -6178369.775 | 5932644.324 |
| White-naped Crane | -5278572.105 | 5877549.54  |
| White-naped Crane | -6226519.908 | 5904796.125 |
| White-naped Crane | -5807415.383 | 6353211.442 |
| White-naped Crane | -6178376.454 | 5932637.798 |
| White-naped Crane | -5278567.652 | 5877549.54  |
| White-naped Crane | -6226513.229 | 5904784.742 |
| White-naped Crane | -6178360.87  | 5932636.167 |
| White-naped Crane | -5807406.478 | 6353228.586 |
| White-naped Crane | -5807413.157 | 6353216.585 |
| White-naped Crane | -5278569.878 | 5877544.677 |
| White-naped Crane | -6226515.455 | 5904787.995 |
| White-naped Crane | -6178358.643 | 5932645.955 |
| White-naped Crane | -5278565.426 | 5877536.573 |
| White-naped Crane | -5807430.968 | 6353199.44  |
| White-naped Crane | -6226515.455 | 5904783.116 |
| White-naped Crane | -6178376.454 | 5932678.58  |
| White-naped Crane | -6225994.48  | 5905103.448 |
| White-naped Crane | -5808887.027 | 6353533.77  |
| White-naped Crane | -6178363.096 | 5932636.167 |
| White-naped Crane | -5809835.469 | 6354075.583 |
| White-naped Crane | -6178365.322 | 5932645.955 |
| White-naped Crane | -5278039.998 | 5876995.206 |
| White-naped Crane | -5811456.281 | 6353484.048 |
| White-naped Crane | -5277942.036 | 5876841.23  |
| White-naped Crane | -6178365.322 | 5932631.273 |
| White-naped Crane | -6225816.369 | 5905033.527 |
| White-naped Crane | -5812821.058 | 6355166.176 |
| White-naped Crane | -6225480.184 | 5905009.136 |
| White-naped Crane | -5278082.299 | 5877006.552 |
| White-naped Crane | -6178380.907 | 5932628.011 |
| White-naped Crane | -5811387.263 | 6356354.674 |
| White-naped Crane | -5278594.369 | 5877397.176 |
| White-naped Crane | -6225580.371 | 5905181.5   |
| White-naped Crane | -6178193.89  | 5932512.191 |
| White-naped Crane | -5278632.217 | 5877504.155 |
| White-naped Crane | -6178265.135 | 5932597.017 |
| White-naped Crane | -6226535.492 | 5910746.161 |
| White-naped Crane | -5278629.991 | 5877337.203 |
| White-naped Crane | -5810806.175 | 6354953.533 |
| White-naped Crane | -5278035.545 | 5876953.065 |
| White-naped Crane | -6178383.134 | 5932637.798 |

|                   |              |             |
|-------------------|--------------|-------------|
| White-naped Crane | -5811211.378 | 6354679.164 |
| White-naped Crane | -5278100.11  | 5876602.979 |
| White-naped Crane | -5278111.242 | 5877079.488 |
| White-naped Crane | -6226526.587 | 5911037.424 |
| White-naped Crane | -6178363.096 | 5932644.324 |
| White-naped Crane | -5278616.633 | 5878204.413 |
| White-naped Crane | -6226635.68  | 5911065.087 |
| White-naped Crane | -6178354.19  | 5932641.061 |
| White-naped Crane | -5278614.406 | 5878188.203 |
| White-naped Crane | -5810852.929 | 6354845.499 |
| White-naped Crane | -6228105.097 | 5914681.486 |
| White-naped Crane | -6178360.87  | 5932652.48  |
| White-naped Crane | -5279046.326 | 5876502.494 |
| White-naped Crane | -5810870.74  | 6354864.362 |
| White-naped Crane | -5278908.29  | 5877496.05  |
| White-naped Crane | -6228125.135 | 5914705.905 |
| White-naped Crane | -6178229.513 | 5932504.035 |
| White-naped Crane | -5810910.815 | 6355064.999 |
| White-naped Crane | -5278122.374 | 5876792.607 |
| White-naped Crane | -6178213.928 | 5932484.46  |
| White-naped Crane | -6227973.74  | 5914653.812 |
| White-naped Crane | -5278914.969 | 5877675.972 |
| White-naped Crane | -6227978.193 | 5914663.58  |
| White-naped Crane | -6178260.682 | 5932564.391 |
| White-naped Crane | -5810930.853 | 6354886.655 |
| White-naped Crane | -5810973.154 | 6354878.081 |
| White-naped Crane | -5278398.446 | 5878144.435 |
| White-naped Crane | -6228608.261 | 5915054.28  |
| White-naped Crane | -6178365.322 | 5932642.692 |
| White-naped Crane | -5278407.352 | 5878165.509 |
| White-naped Crane | -5811200.246 | 6354638.009 |
| White-naped Crane | -6178360.87  | 5932645.955 |
| White-naped Crane | -6228864.296 | 5915363.597 |
| White-naped Crane | -5810821.76  | 6355152.457 |
| White-naped Crane | -6228937.767 | 5915396.157 |
| White-naped Crane | -5278538.709 | 5878240.076 |
| White-naped Crane | -6178367.549 | 5932644.324 |
| White-naped Crane | -5811451.828 | 6354543.697 |
| White-naped Crane | -5278420.71  | 5878212.519 |
| White-naped Crane | -6178356.417 | 5932645.955 |
| White-naped Crane | -6228926.635 | 5915485.698 |
| White-naped Crane | -5811182.435 | 6354715.174 |
| White-naped Crane | -5278532.03  | 5878199.55  |
| White-naped Crane | -6228939.993 | 5915466.162 |
| White-naped Crane | -6178358.643 | 5932623.117 |
| White-naped Crane | -5811313.792 | 6354643.154 |
| White-naped Crane | -5278534.256 | 5878202.792 |
| White-naped Crane | -6228933.314 | 5915472.674 |
| White-naped Crane | -6178363.096 | 5932649.217 |
| White-naped Crane | -6228904.371 | 5915427.089 |
| White-naped Crane | -6178358.643 | 5932639.43  |
| White-naped Crane | -5278538.709 | 5878201.171 |
| White-naped Crane | -5811200.246 | 6354584.852 |
