# Supplementary material for: Why choose Random Forest to predict rare species distribution with few samples in large undersampled areas? Three Asian crane species models provide supporting evidence
Source: PeerJ journal article supplement (doi:10.7717/peerj.2849), 2017-01-12
Supplement: Supporting_Information_Figure.pdf [file Supporting_Information_Figure.pdf]

1 Supplement S2 Prediction of three crane species with different predictor groups

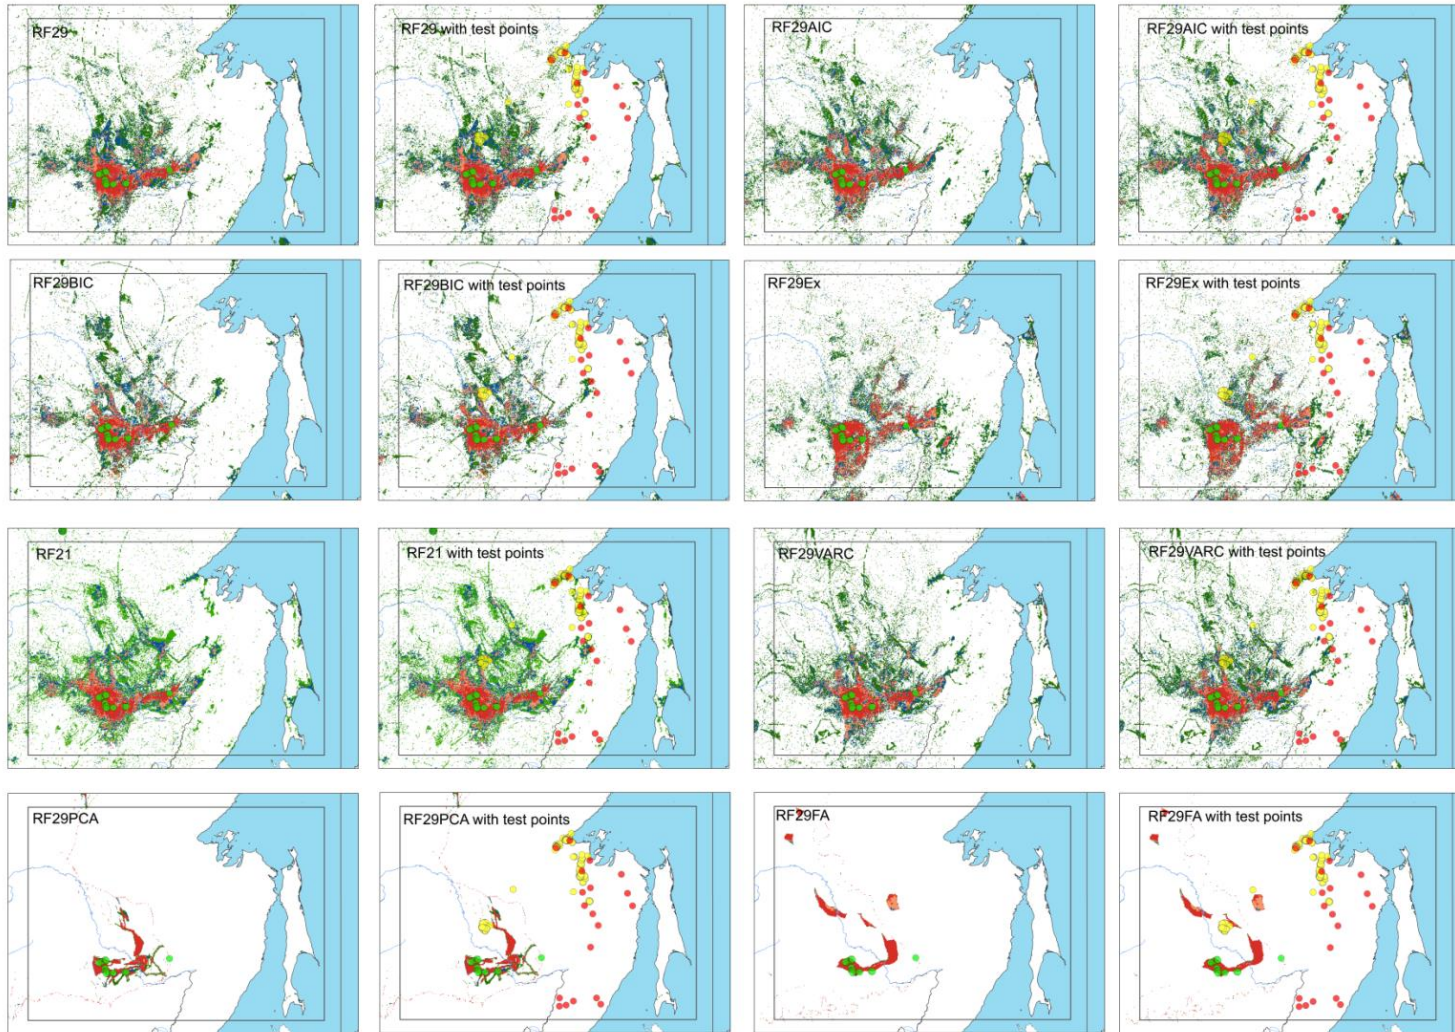

2  
3 For Hooded Cranes, RF21 and RF29VARC are the best, RF21 a little bit better than RF29VARC. PCA and Factor Analysis(FA) are bad

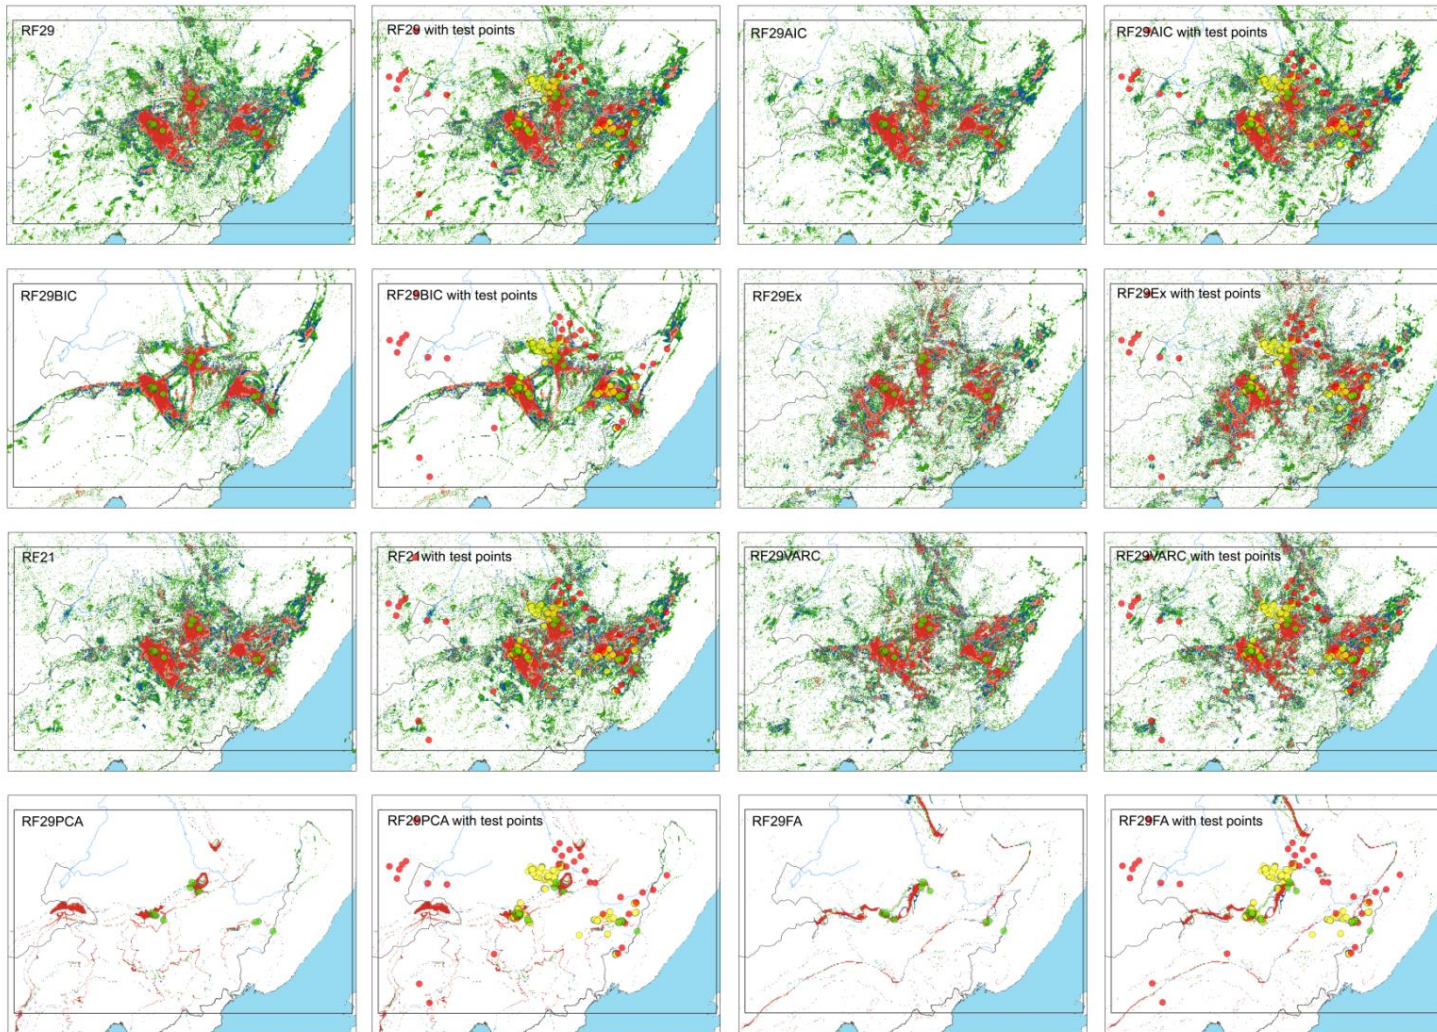

1  
 2 For White-naped Cranes, RF21 was in the first level group, PCA and Factor Analysis(FA) are bad.

3

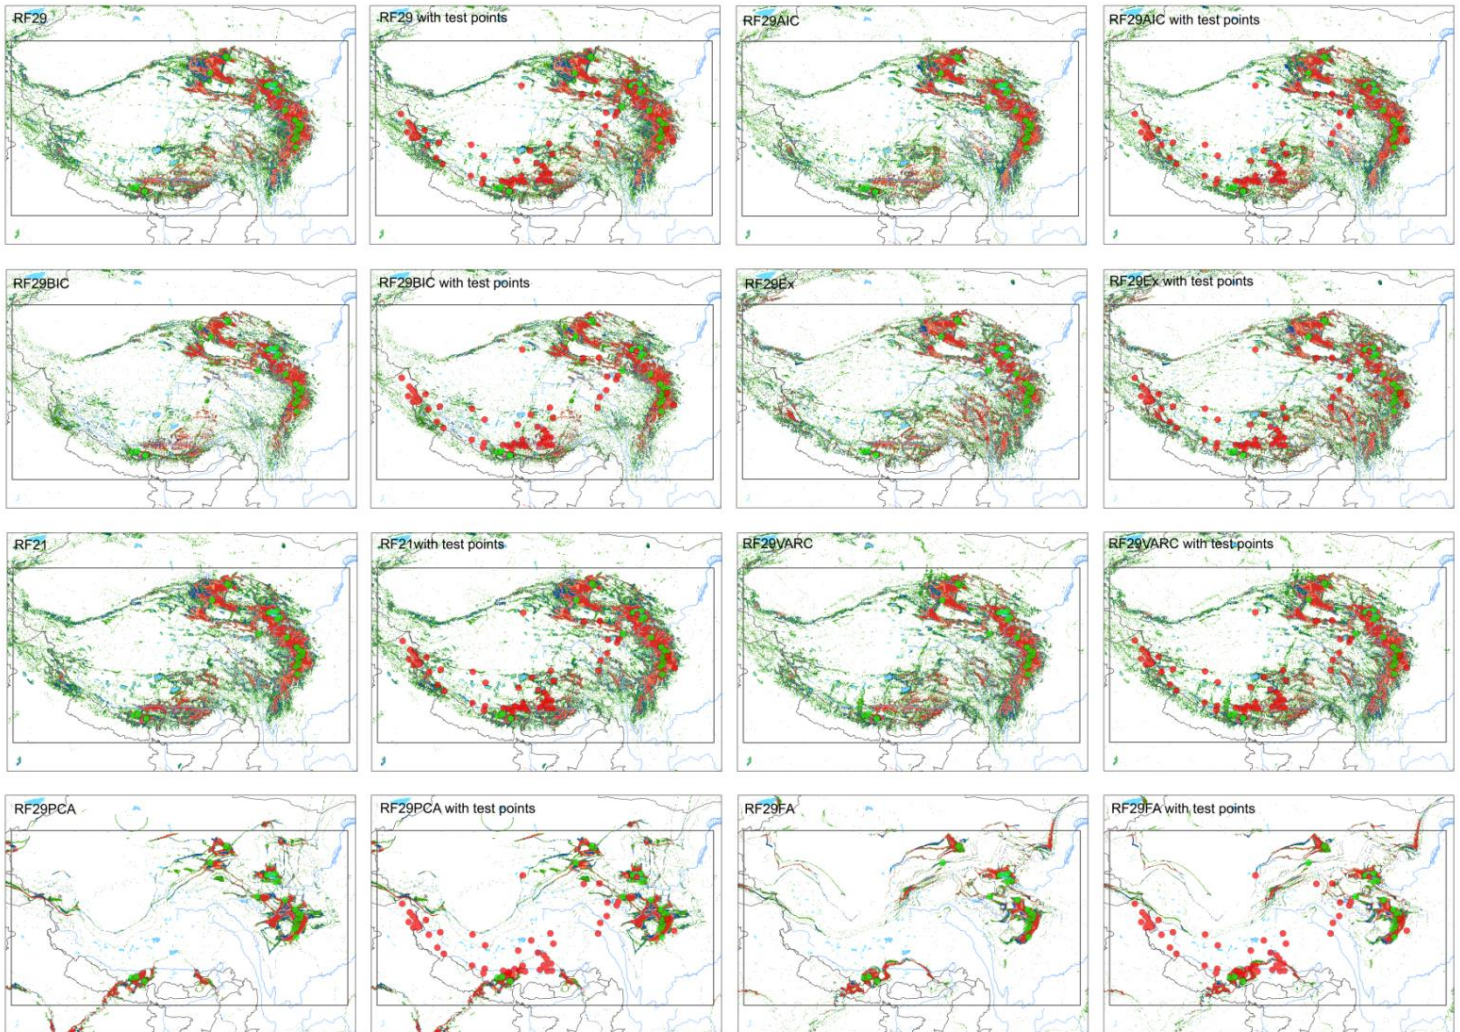

1  
2 For Black-necked Cranes, RF21 was in the first level group, PCA and Factor Analysis (FA) are bad

3  
4
